# Supplementary material for: Beneficial Effects of Phosphite in <em>Arabidopsis thaliana</em> Are Mediated by Activation of ABA, SA, and JA Biosynthesis and Signaling Pathways
Source: Preprints.org preprint supplement (doi:10.20944/preprints202405.2100.v1), 2024-05-31
Supplement: Supplementary file 1 [file supplementary]

## Supporting Information

### **Beneficial effects of Phosphite in *Arabidopsis thaliana* are mediated by activation of ABA, SA, and JA biosynthesis and signaling pathways**

Francisco Gabriel Perez-Zavala<sup>1</sup>, Jonathan Odilón Ojeda-Rivera<sup>1,†</sup>, Luis Herrera-Estrella<sup>1,2</sup>, Damar López-Arredondo<sup>1,\*</sup>

<sup>1</sup> Institute of Genomics for Crop Abiotic Stress Tolerance, Department of Plant and Soil Science, Texas Tech University, Lubbock, TX, United States

<sup>2</sup>Unidad de Genómica Avanzada/Langebío, Centro de Investigación y de Estudios Avanzados, Irapuato, México

<sup>†</sup>Current address: Institute for Genomic Diversity, Cornell University, Ithaca, NY USA 14853

\*Corresponding Author

Damar.Lopez-Arredondo@ttu.edu

Texas Tech University

2500 Broadway W, Lubbock, TX, 79409, USA.

Tel(O):806-83364

Keywords: phosphite, abscisic acid, jasmonic acid, salicylic acid, phosphorus sensing, defense responses, stress conditions

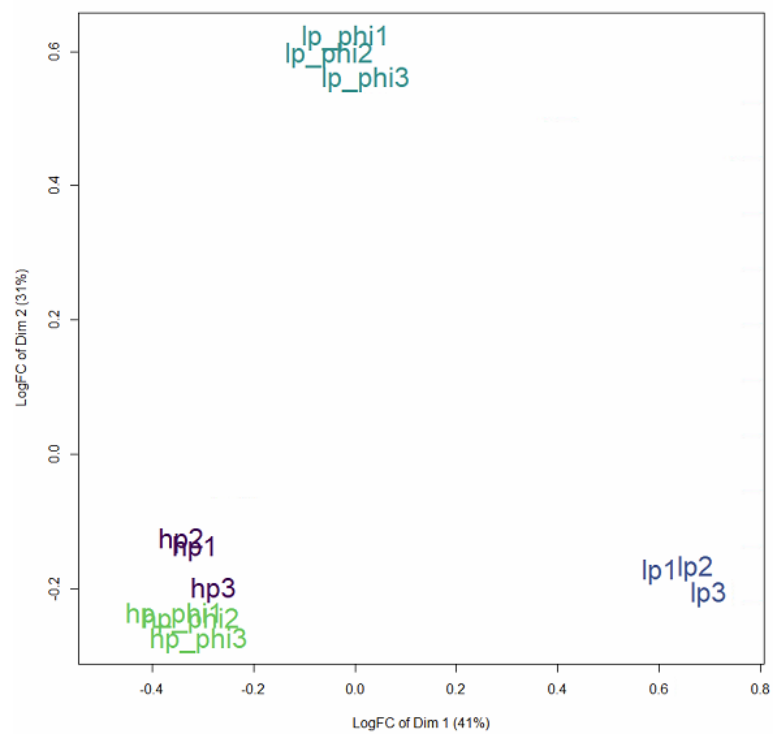

**Figure S1.** Multidimensional scaling (MDS) plot constructed on normalized counts of the RNA-seq libraries. Labels represent the three replicates (1,2, 3) of the different treatments: high phosphate (hp, purple), high phosphate + phosphite (hp\_phi, green), low phosphate (lp, blue), low phosphate+ phosphite (lp\_phi, cyan).

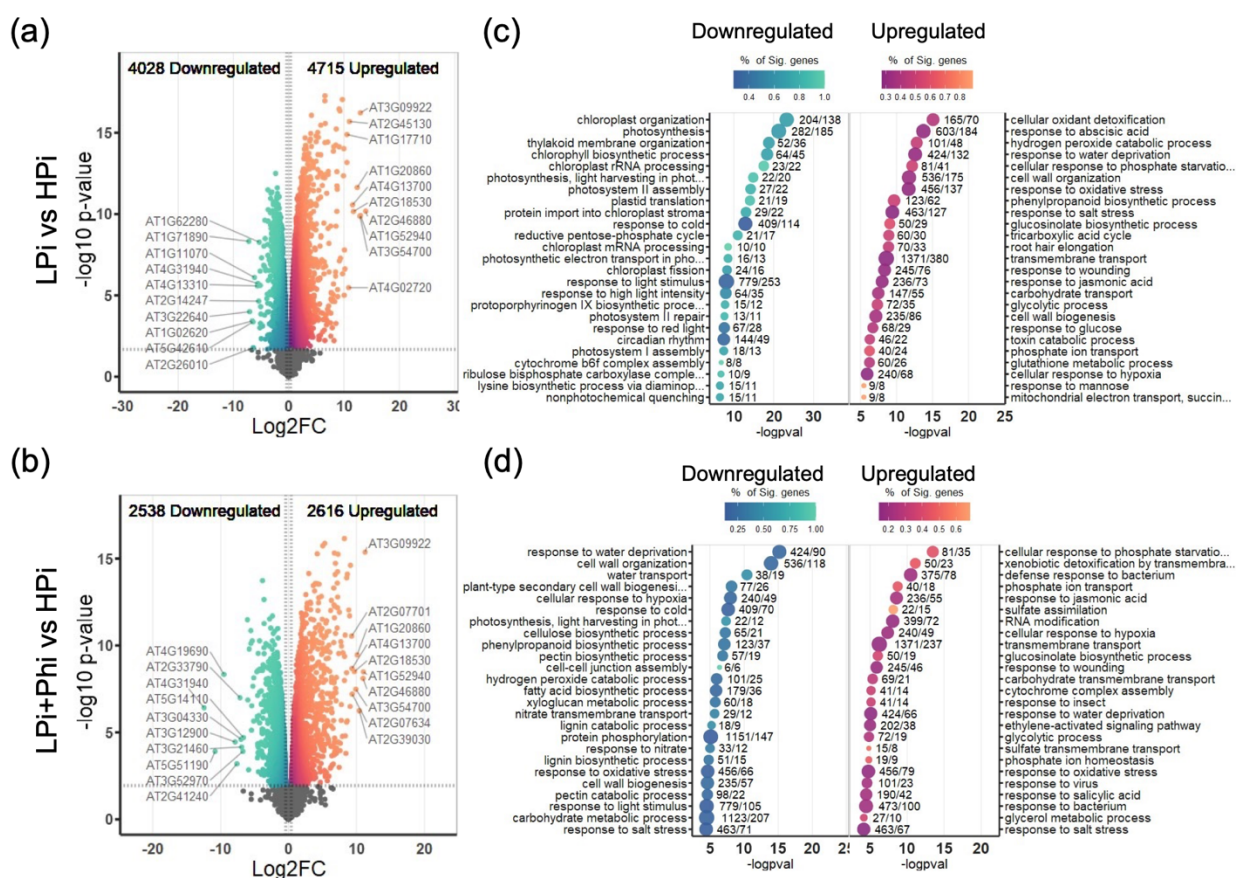

**Figure S2.** Transcriptional landscape of Arabidopsis seedlings under phosphate starvation (LPi), and Pi starvation treated with phosphite (LPi+Phi). Volcano plot of all the differentially expressed genes (DEGs) in (a) LPi and (b) LPi+Phi relative to high Pi control (HPi). Gene Ontology (GO) enriched terms of DEGs in (c) A and (d) B. The top 10 genes ranked according to fold-change are highlighted in a and c.

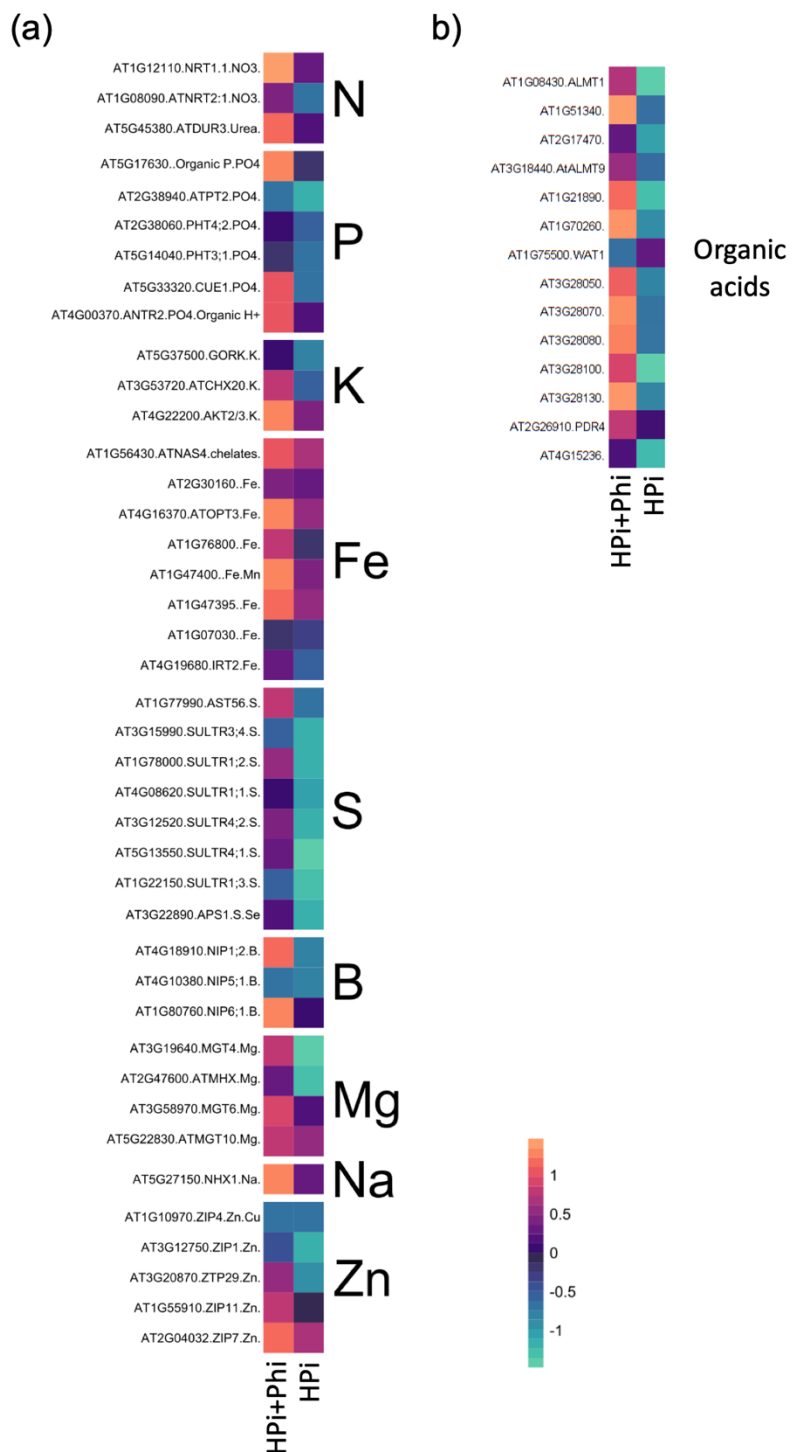

**Figure S3.** Effect of Phosphite (Phi) on the expression of nutrient acquisition-related genes. heatmap showing the expression level (z-score) of genes encoding transporters of (a) macro and microelements, and (b) transporters of organic acids. All heatmaps share the same color scale.

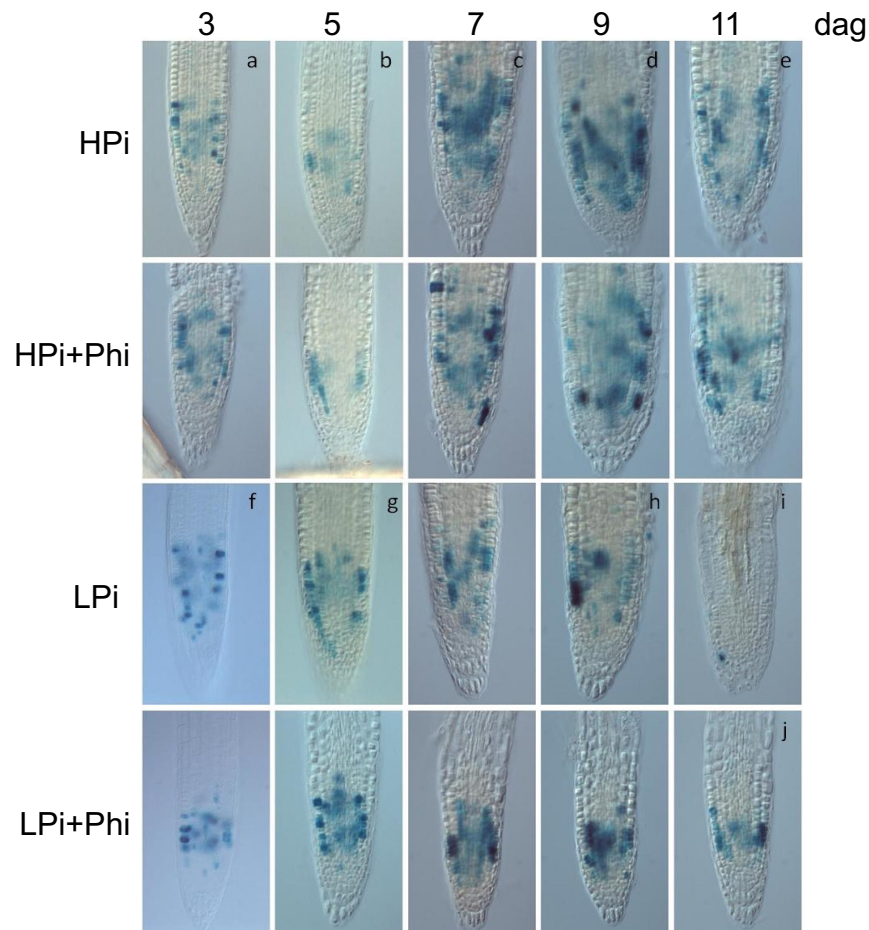

**Figure S4.** Effect of phosphite (Phi) on mitotic activity of the meristematic region of *Arabidopsis* CycB1;1::uidA seedlings. Photographs of representative meristematic regions of the primary root of *Arabidopsis* CycB1;1::uidA seedlings grown on agar plates under deficiency (0 M, LPi) or sufficiency (1 mM, HPi) of phosphate (Pi) supplemented with 1 mM phosphite (Phi), at different days after the germination (dag).

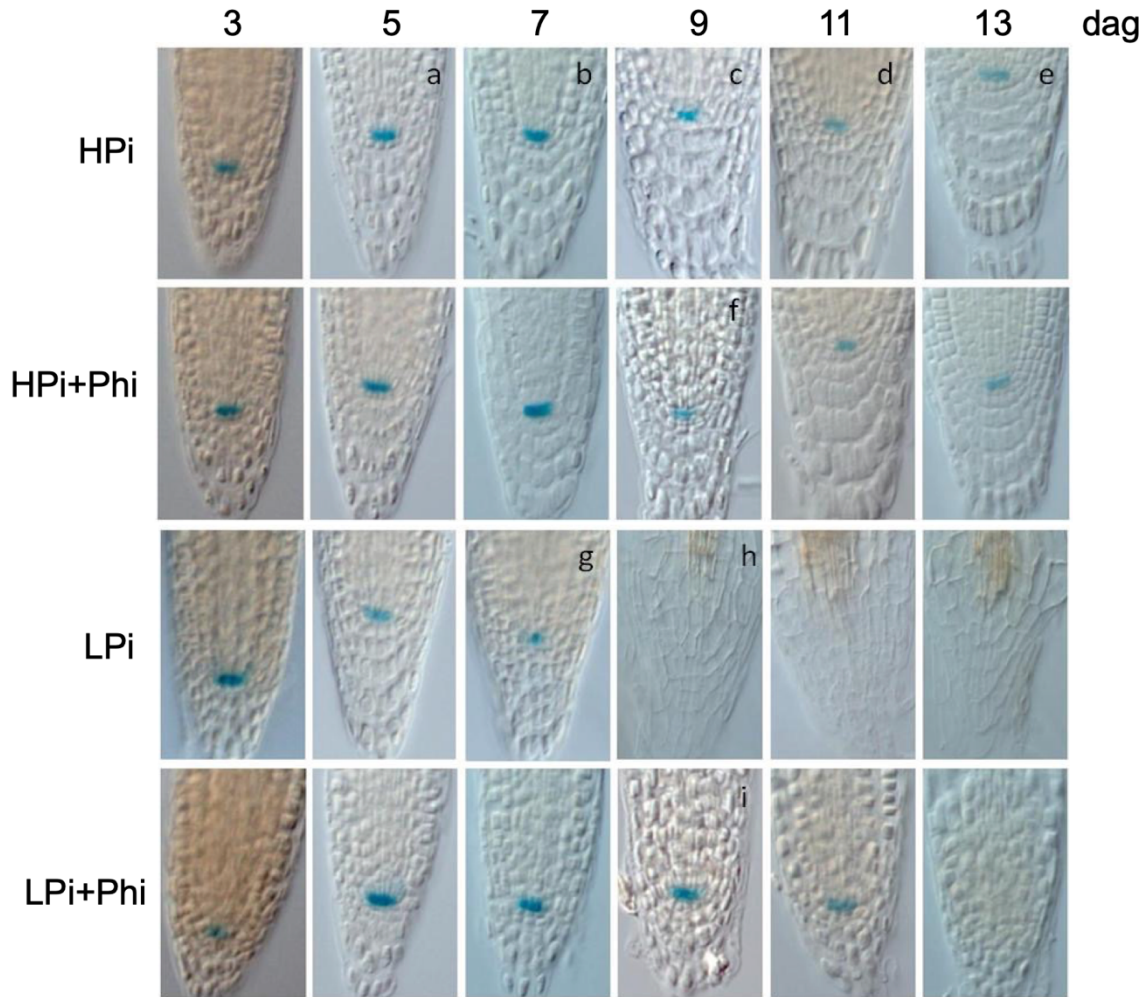

**Figure S5.** Effect of phosphite (Phi) on the activity of quiescent center (QC) activity of *Arabidopsis* QC46::uidA seedlings. Photographs of representative meristematic regions of the primary root of *Arabidopsis* QC46::uidA seedlings grown on agar plates under deficiency (0 M, L<sub>Pi</sub>) or sufficiency (1mM, H<sub>Pi</sub>) of phosphate (Pi) supplemented with 1 mM phosphite (Phi), at different days after the germination (dag). The meristematic regions were photographed using the same magnification.

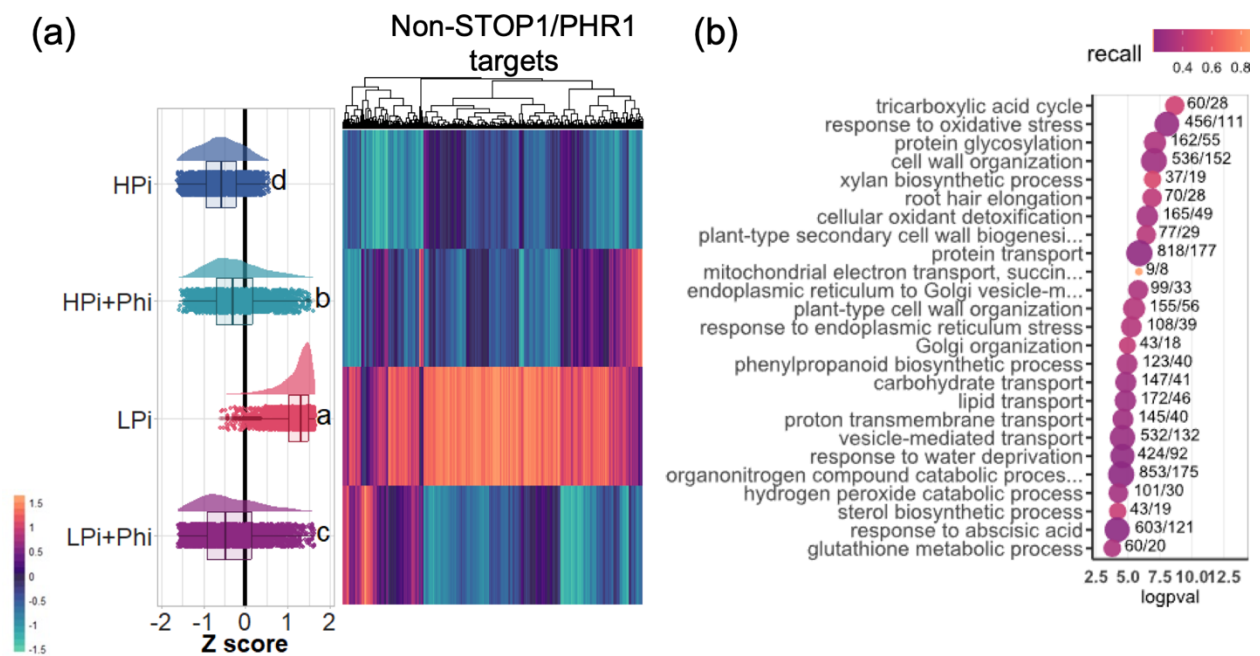

**Figure S6.** Effect of phosphite (Phi) on the expression pattern of non-STOP1/PHR1 target genes or genes previously described as part of the local or systemic PSRs that are upregulated in low phosphate (LPi) treatments. (a) Heatmap and rain cloud plots and (b) GO terms enrichment analysis of the non-STOP1/PHR1 target genes.

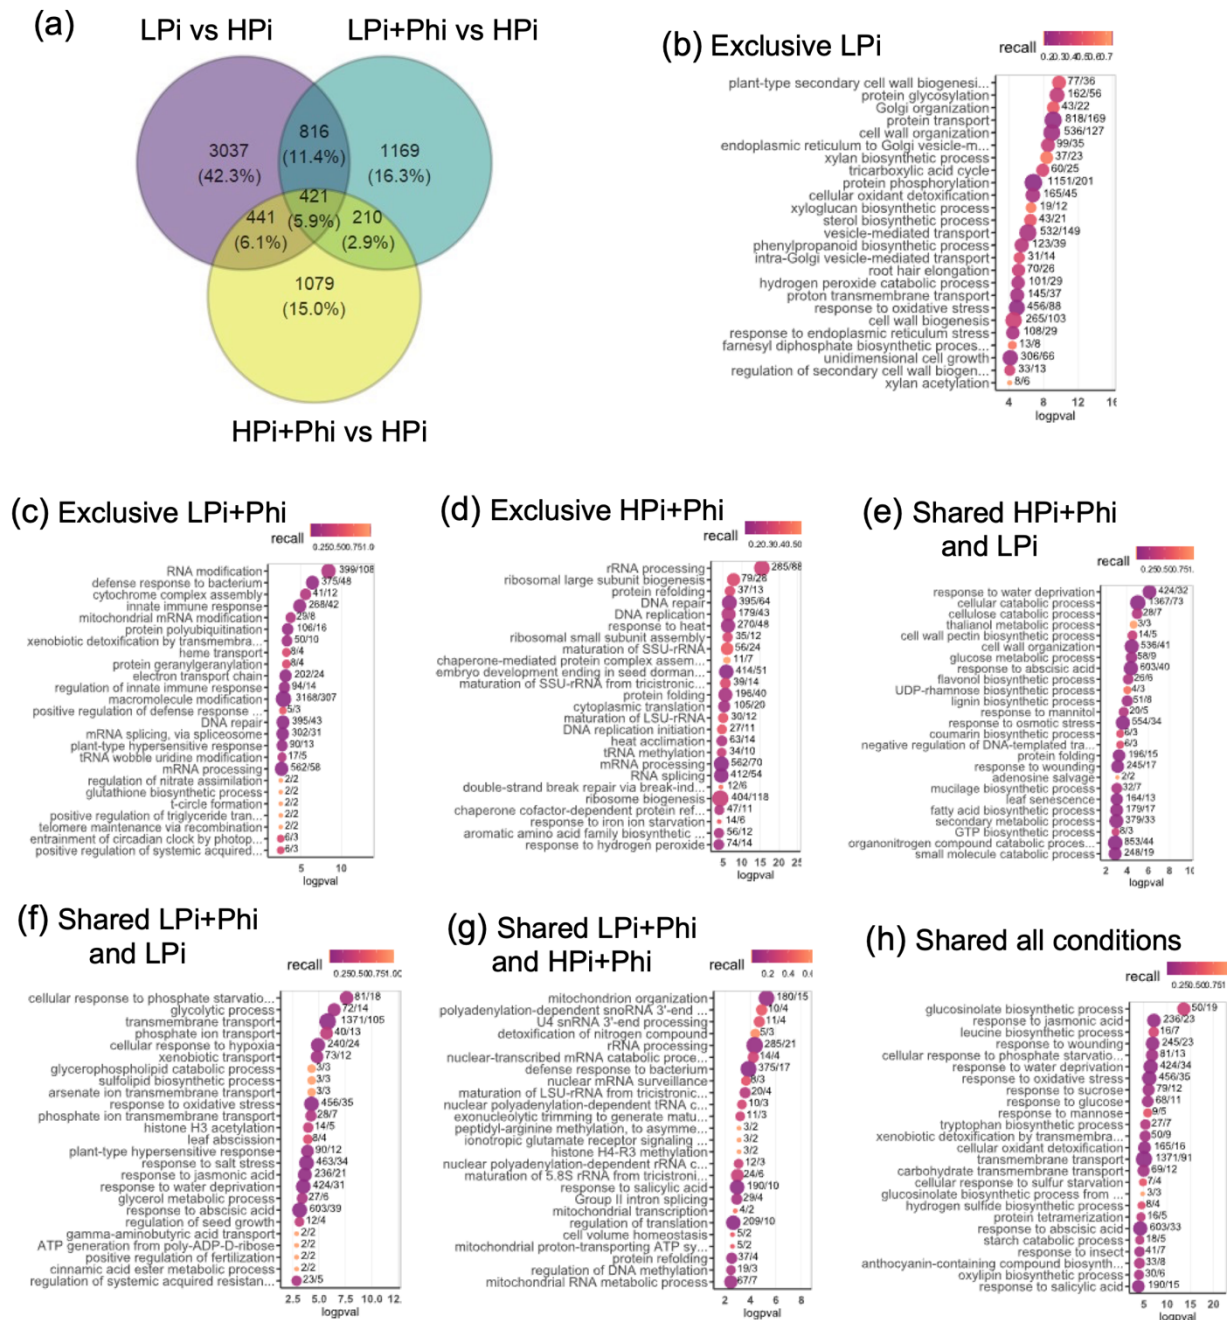

**Figure S7.** Effect of phosphite (Phi) on the transcriptional profile of Arabidopsis under the different treatments relative to the control with high phosphorus level (HPI). Each number refers to a specific set of enriched terms of the Gene Ontology. (a) Venn diagram showing the intersections of differentially expressed genes (DEGs) in all treatments. (b-g) Gene ontology (GO) terms shared and exclusive to the different treatments, and (h) GO terms shared between all conditions.
