# Supplementary material for: Beneficial Effects of Phosphite in <em>Arabidopsis thaliana</em> Are Mediated by Activation of ABA, SA, and JA Biosynthesis and Signaling Pathways
Source: Preprints.org preprint supplement (doi:10.20944/preprints202405.2100.v1), 2024-05-31
Supplement: Supplementary file 1 [file supplementary]

## Sheet: Supplementary Table 1
Sequencing run information
Treatment	Sample	Raw reads	Raw data	Effective(%)	Error(%)	Q20(%)	Q30(%)	GC(%)
HPi	A1	44321302	6.6	96.35	0.03	97.61	93.26	45.8
HPi	A2	42854466	6.4	96.89	0.03	97.55	93.11	45.76
HPi	A3	43320070	6.5	98.37	0.03	97.31	92.58	45.73
LPi	A4	39976302	6	97.35	0.03	97.58	93.15	45.5
LPi	A5	40862048	6.1	97.73	0.03	97.49	93	45.24
LPi	A6	41136866	6.2	97.88	0.03	97.52	93.07	45.26
LPi+Phi	A7	42129246	6.3	97.71	0.03	97.44	92.85	45.47
LPi+Phi	A8	42059934	6.3	97.74	0.03	97.56	93.13	45.68
LPi+Phi	A9	41707928	6.3	98.46	0.03	97.48	92.92	45.24
HPi+Phi	phi1	48058126	7.2	98.79	0.02	98.44	95.26	45.66
HPi+Phi	phi2	45882546	6.9	98.59	0.02	98.29	94.87	45.64
HPi+Phi	phi3	42036678	6.3	98.69	0.02	98.44	95.29	45.56

## Sheet: Supplementary Table 2
Kallisto run information
Treatment	NCBI library ID	pairs processed	pairs pseudoaligned	% of unique pairs pseudo aligned
HPi	A1	22147498	21523128	96.3
HPi	A2	21415824	20745728	96
HPi	A3	21648355	21046826	96.3
LPi	A4	19977737	19501695	96.7
LPi	A5	20422275	19868017	96.3
LPi	A6	20559564	20068691	96.6
LPi+Phi	A7	21054825	20178901	95
LPi+Phi	A8	21017339	20038266	94.5
LPi+Phi	A9	20844022	19800765	94.1
HPi+Phi	Phi1	24005983	23503093	97
HPi+Phi	Phi2	22920280	22466261	97.1
HPi+Phi	Phi3	20998083	20586884	97.1

## Sheet: Supplementary Table 3
Differentially expressed genes in Lpi treatment relative to HPi
gene ID	logFC	unshrunk.logFC	logCPM	PValue
AT1G01070	0.90473	0.904973	4.30716	0.000129357
AT1G01190	1.15923	1.15996	3.18858	8.6507e-05
AT1G01200	1.30296	1.30511	1.80722	5.89822e-05
AT1G01230	0.444429	0.444562	4.25446	0.0137894
AT1G01250	2.69183	2.69662	2.16174	8.98146e-07
AT1G01360	0.84918	0.849455	4.12108	3.58108e-06
AT1G01380	3.07145	3.0791	1.78611	8.39075e-08
AT1G01453	3.3854	3.39777	1.29625	1.0303e-05
AT1G01470	2.37408	2.37432	6.08145	6.04379e-12
AT1G01480	1.98304	1.98576	2.307	4.75579e-05
AT1G01560	1.23496	1.23723	1.74927	0.0201214
AT1G01590	3.72777	3.84359	-0.802051	3.60715e-06
AT1G01630	0.596433	0.596504	5.71896	0.00134589
AT1G01660	2.09206	2.09698	1.3967	3.32851e-05
AT1G01680	4.0842	4.13248	1.22008	1.52862e-06
AT1G01750	2.51717	2.51792	4.3919	9.43097e-09
AT1G01780	1.01878	1.01907	4.13928	2.45075e-05
AT1G02205	0.624492	0.624749	4.13896	0.00805257
AT1G02220	1.19519	1.19538	5.2729	3.51236e-06
AT1G02230	1.56057	1.56398	1.60216	2.49537e-05
AT1G02260	0.487952	0.488113	4.28737	0.00934679
AT1G02310	2.93984	2.94543	1.95384	2.98452e-08
AT1G02335	0.495582	0.495724	4.10898	0.00721777
AT1G02340	0.625935	0.62628	3.12428	0.00776598
AT1G02390	2.25503	2.25844	2.30123	1.06614e-06
AT1G02450	5.74344	1.44269e+08	-1.18074	0.00281494
AT1G02460	0.732154	0.734191	1.33076	0.0141667
AT1G02520	0.766831	0.766923	5.59046	0.000500122
AT1G02570	3.82422	3.84349	0.943369	5.19223e-08
AT1G02575	2.24046	2.25184	0.0957204	5.56071e-05
AT1G02810	0.98665	0.986887	4.50991	2.4857e-05
AT1G02850	0.82319	0.82327	6.71584	0.000990396
AT1G02880	0.592297	0.592415	4.72026	0.000207202
AT1G02900	0.578492	0.578582	5.02432	0.0113459
AT1G02950	0.496181	0.496469	3.06671	0.0164639
AT1G03020	4.11966	4.14184	1.33529	1.96244e-09
AT1G03070	1.88473	1.88759	1.78463	1.66811e-06
AT1G03170	1.97919	1.98822	0.483567	5.65115e-06
AT1G03230	1.14089	1.14101	5.5316	1.90872e-05
AT1G03250	1.52985	1.53014	5.08859	2.09264e-09
AT1G03550	0.834094	0.834344	4.1508	9.50273e-06
AT1G03700	1.21658	1.22039	0.702969	0.00400869
AT1G03730	0.642042	0.642375	3.35891	0.00258716
AT1G03790	3.47429	3.51333	0.309606	1.50598e-06
AT1G03820	0.767758	0.768424	2.94513	0.00536153
AT1G03840	1.45191	1.45351	2.50895	2.46341e-05
AT1G03850	1.02254	1.02284	4.36182	0.00014905
AT1G03905	0.691549	0.691959	3.24509	0.00329362
AT1G03920	0.885398	0.886301	2.28218	0.000324396
AT1G04010	0.705849	0.706186	3.74033	0.000426073
AT1G04040	0.500695	0.50071	7.28216	0.00398329
AT1G04120	0.756118	0.756146	7.34184	0.000262446
AT1G04160	1.17114	1.17148	4.27519	4.30258e-07
AT1G04200	0.52963	0.529715	5.12902	0.00215825
AT1G04220	1.19009	1.19028	5.20563	6.10478e-05
AT1G04250	0.673261	0.67329	7.03169	0.000337394
AT1G04310	0.778721	0.779087	3.57668	0.000310337
AT1G04330	2.14155	2.14597	1.82319	2.51672e-07
AT1G04340	0.536866	0.536984	4.63566	0.00562948
AT1G04490	1.87577	1.886	0.60867	0.000212625
AT1G04610	1.04463	1.0457	2.04851	0.00514203
AT1G04690	0.512504	0.512546	6.19798	0.000904155
AT1G04700	1.12104	1.12195	2.69603	5.43808e-05
AT1G04750	0.408144	0.408174	6.30085	0.0169619
AT1G04820	0.841914	0.841926	8.54633	3.04603e-05
AT1G04910	0.503664	0.503763	4.88887	0.00102303
AT1G04980	1.07087	1.07116	4.40601	1.90769e-06
AT1G04990	1.12155	1.12186	4.58144	1.23138e-06
AT1G05000	2.55755	2.5578	6.29293	2.57738e-12
AT1G05100	2.79487	2.7985	2.43025	1.79649e-07
AT1G05170	0.683268	0.683437	4.54689	0.000591864
AT1G05205	0.633784	0.634019	3.90891	0.000635278
AT1G05210	0.902805	0.903456	2.76949	0.000360769
AT1G05220	1.14543	1.14918	0.707205	0.0117742
AT1G05250	3.17426	3.1744	7.49016	5.7149e-09
AT1G05260	1.12848	1.12853	6.51514	7.68136e-07
AT1G05280	1.80558	1.80838	1.95257	2.58191e-05
AT1G05300	1.93324	1.93411	3.72988	7.80342e-11
AT1G05340	1.36729	1.36757	4.52751	9.23016e-07
AT1G05360	0.628201	0.628383	4.33829	0.00063775
AT1G05450	2.33007	2.34739	0.108269	0.00172732
AT1G05490	1.18097	1.18704	0.632141	0.00318065
AT1G05530	1.40591	1.40816	1.47258	0.000417944
AT1G05610	3.95234	3.96705	1.47318	2.07754e-08
AT1G05620	0.995461	0.995639	4.85169	2.81695e-06
AT1G05660	1.17685	1.17744	2.98722	4.36005e-05
AT1G05710	0.746985	0.74728	4.02915	0.000895594
AT1G05720	0.569614	0.5698	4.08974	0.0036808
AT1G05805	0.56361	0.563794	4.22942	0.0116148
AT1G05990	3.2575	3.27607	0.568446	1.63988e-05
AT1G06000	1.81879	1.81886	7.42386	0.000555971
AT1G06090	1.3713	1.37152	4.90729	1.73979e-06
AT1G06120	0.716396	0.716901	2.4677	0.00758261
AT1G06210	0.579508	0.579628	4.88113	0.00037924
AT1G06270	0.681595	0.682417	2.37237	0.0129645
AT1G06310	1.24749	1.25054	1.07643	0.00230023
AT1G06330	1.70477	1.72591	-0.923248	0.00378136
AT1G06350	1.08018	1.08289	1.68262	0.000600551
AT1G06540	2.82852	2.83534	2.25385	0.00105313
AT1G06550	1.11924	1.11933	6.36807	5.73839e-05
AT1G06620	1.16149	1.16181	4.32228	2.11128e-08
AT1G06640	0.488278	0.488297	7.14205	0.00343473
AT1G06740	0.590006	0.590594	2.6872	0.017592
AT1G06760	0.556256	0.556268	7.7844	0.00190058
AT1G06780	0.836655	0.836838	4.65972	1.56772e-05
AT1G06850	0.544559	0.544792	3.59739	0.0173904
AT1G06870	0.64319	0.643299	4.99052	0.000702812
AT1G06890	0.446187	0.446227	5.93706	0.00558351
AT1G06923	2.27728	2.28508	0.846026	7.73041e-07
AT1G06930	1.45551	1.45971	0.75475	0.0010326
AT1G07020	0.819706	0.82018	3.40064	0.000381087
AT1G07175	2.58529	2.61836	-0.732991	0.00228253
AT1G07230	0.638125	0.638234	5.16989	0.000358294
AT1G07260	0.555181	0.555441	3.41616	0.00287753
AT1G07290	1.30047	1.30236	1.96242	0.000143517
AT1G07410	1.20738	1.20894	2.15685	0.000281758
AT1G07420	0.788096	0.788255	4.77417	5.75897e-06
AT1G07430	5.23814	5.35985	0.605824	1.85095e-07
AT1G07460	2.64791	2.69583	-1.37648	0.00103459
AT1G07530	0.741625	0.741718	5.56103	1.99528e-05
AT1G07620	1.03692	1.03761	3.14368	3.55127e-05
AT1G07670	1.06541	1.06546	6.8427	6.08361e-07
AT1G07680	6.46624	1.44269e+08	-1.34502	0.000308865
AT1G07730	1.10928	1.11006	2.64166	0.000981711
AT1G07750	0.96049	0.960578	5.79971	1.55719e-07
AT1G07770	0.665198	0.665208	8.62632	0.000170374
AT1G07795	2.15217	2.16155	0.337893	0.000139623
AT1G07820	0.67854	0.67861	5.67982	0.00010178
AT1G07890	0.510493	0.510496	9.57761	0.00717437
AT1G07900	3.15263	3.1768	0.774508	6.52729e-06
AT1G07985	1.07662	1.07957	1.32081	0.00215671
AT1G08040	0.60835	0.608533	4.37847	0.000955235
AT1G08050	0.96274	0.963144	3.66816	0.000823572
AT1G08160	0.625675	0.625911	3.73687	0.00234519
AT1G08165	5.77509	5.78374	4.19185	2.85017e-13
AT1G08170	7.57113	7.80978	1.03839	5.4939e-10
AT1G08180	1.45274	1.45382	3.05987	1.8097e-05
AT1G08230	1.30163	1.30194	4.74525	1.28311e-07
AT1G08310	6.54552	6.55057	5.77756	5.3774e-18
AT1G08315	0.737785	0.738114	3.64245	0.000647215
AT1G08320	0.513285	0.513394	4.44461	0.00494405
AT1G08340	1.51783	1.51848	3.62329	2.82492e-09
AT1G08430	1.20222	1.20247	5.20495	6.16978e-06
AT1G08440	5.444	1.44269e+08	-0.930779	0.0051703
AT1G08480	0.515334	0.515378	6.07052	0.000757024
AT1G08500	1.13023	1.13079	3.20888	7.39014e-05
AT1G08650	3.74536	3.74558	7.51029	3.76106e-14
AT1G08820	0.501807	0.501882	5.30795	0.00115337
AT1G08830	1.21814	1.21816	8.48528	1.24016e-06
AT1G08890	1.58413	1.58484	3.4627	5.76619e-08
AT1G08920	1.62618	1.62644	5.36645	2.54063e-09
AT1G08990	0.740237	0.740478	3.95153	0.00109929
AT1G09060	0.446193	0.446246	5.68399	0.00645643
AT1G09070	0.879217	0.879237	7.841	7.19947e-06
AT1G09170	1.66268	1.66377	3.03125	4.92032e-06
AT1G09176	3.59379	3.63312	-0.0953875	0.000137357
AT1G09180	2.16028	2.17118	0.811381	0.000205501
AT1G09200	0.571382	0.571439	5.76463	0.00469982
AT1G09210	0.865498	0.865523	7.59761	1.40761e-05
AT1G09240	1.2854	1.28585	4.31772	8.42834e-06
AT1G09310	0.94802	0.948038	8.62782	2.50933e-05
AT1G09350	4.8959	4.91971	2.11919	6.13415e-08
AT1G09500	1.91256	1.91562	2.78691	2.16011e-06
AT1G09530	1.93806	1.93853	4.84627	4.67658e-11
AT1G09540	1.2568	1.25832	1.94234	2.93972e-05
AT1G09580	0.92656	0.927015	3.45161	5.81237e-05
AT1G09740	0.541196	0.54123	6.31978	0.00768394
AT1G09780	1.27338	1.2734	8.28222	7.76755e-09
AT1G09850	0.863294	0.863482	4.7697	4.85901e-06
AT1G09930	3.95003	4.17552	-0.960158	0.000156746
AT1G09932	1.31278	1.31422	2.71412	0.000171978
AT1G09950	0.998178	1.00328	-0.0188926	0.0161999
AT1G09960	0.697146	0.697463	3.59155	0.000638814
AT1G09970	0.466282	0.466293	7.89023	0.00606849
AT1G10030	0.691371	0.691591	3.99713	0.000380206
AT1G10040	1.28111	1.28242	2.4673	2.73884e-05
AT1G10050	0.91959	0.919832	4.36671	3.2762e-05
AT1G10060	1.20928	1.20975	3.94524	7.67725e-07
AT1G10090	0.485929	0.486039	4.53536	0.0171414
AT1G10200	0.532395	0.532452	5.5515	0.00266306
AT1G10210	0.502443	0.502781	3.07116	0.018004
AT1G10220	1.43989	1.44853	0.147009	0.00388827
AT1G10300	1.15747	1.16026	1.56042	0.0045043
AT1G10385	3.33491	3.35521	0.461999	1.25589e-05
AT1G10400	1.26311	1.26576	1.44084	0.000732889
AT1G10410	0.470349	0.470397	5.73312	0.0075776
AT1G10530	1.46474	1.46756	1.55099	0.00151595
AT1G10560	1.36935	1.37102	1.9838	0.000267621
AT1G10630	0.598522	0.598564	6.22376	0.000376003
AT1G10690	0.854046	0.855441	2.02839	0.00307316
AT1G10810	0.815709	0.817193	1.37834	0.0179472
AT1G11000	0.745183	0.74548	3.77675	8.65491e-05
AT1G11130	0.543622	0.543759	4.57341	0.00230335
AT1G11160	1.29573	1.29673	2.84734	1.53502e-05
AT1G11190	1.88534	1.88675	3.26831	1.52318e-08
AT1G11210	3.17223	3.17755	2.11171	9.50546e-07
AT1G11310	0.611713	0.611743	6.75964	0.000193253
AT1G11420	0.701187	0.701927	2.6962	0.00497572
AT1G11450	0.678794	0.679037	4.05574	0.000205747
AT1G11460	2.50243	2.50555	2.32021	3.82933e-08
AT1G11490	2.24452	2.26722	-0.580125	0.00141844
AT1G11540	1.00468	1.00604	1.98022	0.00116201
AT1G11545	0.463457	0.463519	5.1472	0.00602765
AT1G11655	2.26207	2.27263	0.391663	8.07099e-05
AT1G11670	0.685933	0.686001	5.61127	2.83051e-05
AT1G11680	0.511949	0.51197	7.07113	0.000595776
AT1G11700	0.523682	0.523819	4.62176	0.0168852
AT1G11840	1.06628	1.0663	8.3001	6.43229e-08
AT1G11905	0.528311	0.528539	3.71115	0.0020182
AT1G11910	0.460789	0.460792	9.41453	0.00911112
AT1G11920	3.06214	3.11842	-0.682683	0.000578929
AT1G11940	0.498198	0.498669	2.60914	0.0176245
AT1G12000	0.891724	0.891754	7.43809	2.22089e-05
AT1G12040	2.80535	2.80607	4.82187	1.01888e-06
AT1G12050	0.901817	0.90198	5.32156	3.88856e-07
AT1G12080	1.20087	1.20096	5.99728	1.02041e-06
AT1G12140	0.442688	0.442751	5.50178	0.00522222
AT1G12150	1.96112	1.96482	1.57238	1.52758e-05
AT1G12160	0.470943	0.471168	3.47167	0.0174694
AT1G12200	2.04345	2.04375	5.86637	2.67723e-11
AT1G12420	1.22907	1.22939	4.42194	9.26992e-08
AT1G12450	0.884693	0.885354	2.99628	0.00035018
AT1G12480	1.06048	1.06343	1.47236	0.00298684
AT1G12560	2.41603	2.41665	4.65947	1.03941e-09
AT1G12845	1.11573	1.11882	1.7465	0.00326302
AT1G12890	2.78324	2.92483	-1.20665	0.0128218
AT1G12950	2.94158	2.94312	4.02017	1.26193e-11
AT1G13000	0.483816	0.483977	4.10774	0.0076262
AT1G13130	1.61991	1.62405	1.22233	5.62522e-05
AT1G13180	0.655733	0.656127	3.33857	0.00174959
AT1G13210	0.784747	0.784865	5.08298	0.000134973
AT1G13250	0.511525	0.511823	3.54933	0.0144192
AT1G13280	0.955979	0.956165	4.9029	2.9964e-06
AT1G13300	0.868776	0.868983	4.52422	5.38233e-05
AT1G13340	0.991318	0.992056	3.17342	0.00244594
AT1G13420	1.70432	1.70463	4.8284	8.65667e-06
AT1G13440	0.461731	0.461733	10.8461	0.0122917
AT1G13530	0.8297	0.830975	1.64248	0.00608563
AT1G13580	0.610816	0.611069	3.68047	0.0034979
AT1G13590	1.47381	1.47558	2.34746	8.14895e-06
AT1G13620	1.46333	1.47608	-0.439258	0.016463
AT1G13635	1.1062	1.10828	1.52809	0.000132354
AT1G13750	4.1185	4.11979	5.433	8.48426e-17
AT1G13830	0.890774	0.891372	2.93508	0.00111917
AT1G13900	0.502355	0.502446	5.0089	0.00102237
AT1G13910	0.544659	0.545262	2.4774	0.0148943
AT1G13930	0.948307	0.948332	7.95316	2.10483e-05
AT1G13950	0.692613	0.692905	3.6053	9.26852e-05
AT1G13970	1.15005	1.15059	3.42555	1.17723e-05
AT1G13990	1.23285	1.23314	4.8597	1.37096e-06
AT1G14000	0.666141	0.666189	6.26258	1.44155e-05
AT1G14010	0.750613	0.750775	4.67068	2.24468e-05
AT1G14040	0.57975	0.57995	4.02768	0.00932479
AT1G14080	1.26004	1.26059	3.49983	5.56195e-06
AT1G14110	1.03109	1.03574	0.569008	0.0135263
AT1G14160	0.726094	0.726513	2.90885	0.00071173
AT1G14170	0.952945	0.953136	4.62425	1.7488e-06
AT1G14220	2.88798	2.88912	4.18051	4.85163e-11
AT1G14240	0.991879	0.992308	3.64111	1.57915e-05
AT1G14360	0.876861	0.877106	4.64148	4.10335e-05
AT1G14390	1.14819	1.14938	2.39173	0.000238775
AT1G14450	0.47833	0.478382	5.79467	0.00459381
AT1G14490	0.859206	0.861273	1.32101	0.0116147
AT1G14520	2.19488	2.19899	2.0976	1.08542e-07
AT1G14530	0.766396	0.766951	2.87022	0.000414379
AT1G14660	1.18862	1.18961	2.88888	2.69418e-06
AT1G14670	0.51763	0.51765	7.14553	0.002646
AT1G14730	0.801736	0.801973	4.02096	1.19817e-05
AT1G14780	1.33955	1.34014	3.54403	1.12111e-07
AT1G14830	0.489364	0.489389	6.74787	0.00195916
AT1G14860	0.816987	0.817339	3.61208	8.98066e-05
AT1G14870	0.842058	0.842083	7.29201	0.000109519
AT1G14920	0.534181	0.534236	5.57552	0.00409959
AT1G14960	1.85304	1.85386	3.71859	1.1026e-06
AT1G14980	0.641256	0.641304	6.59858	0.00164108
AT1G14990	0.604782	0.605244	2.98692	0.00465997
AT1G15010	1.7183	1.73469	-0.259787	0.00594162
AT1G15040	2.28896	2.29013	3.78368	2.85638e-06
AT1G15100	0.565926	0.565972	5.94154	0.00970705
AT1G15110	1.20056	1.20077	4.96328	4.78882e-07
AT1G15120	0.511008	0.511033	6.80229	0.00096416
AT1G15150	2.27512	2.31566	-0.675928	0.00153381
AT1G15210	0.652154	0.652186	6.64732	0.00678054
AT1G15270	0.487698	0.487733	6.47709	0.0068758
AT1G15310	1.22689	1.22787	2.97935	5.74743e-07
AT1G15385	2.58107	2.62006	-0.669522	0.000354035
AT1G15520	1.91095	1.91262	3.75121	5.74485e-05
AT1G15600	8.04503	1.44269e+08	-0.972099	9.03508e-06
AT1G15760	0.623016	0.624045	1.81148	0.0165534
AT1G16000	0.614993	0.615286	3.67299	0.00340971
AT1G16060	1.28348	1.28406	3.8255	9.34263e-07
AT1G16230	3.41036	3.5599	-1.75168	0.00111385
AT1G16300	0.538787	0.538944	4.29901	0.00593989
AT1G16310	0.703173	0.703691	2.91616	0.00172761
AT1G16370	0.765301	0.76584	2.66493	0.0069993
AT1G16400	1.45817	1.45829	6.23869	2.3448e-09
AT1G16410	1.36758	1.36776	6.07263	2.75624e-06
AT1G16440	1.99949	2.00228	1.95805	1.18146e-06
AT1G16500	1.63242	1.6338	2.83417	4.89035e-07
AT1G16700	0.576599	0.576639	6.34325	0.000201692
AT1G16840	0.44071	0.440802	4.83421	0.020323
AT1G16850	2.50276	2.51085	1.2695	9.27734e-06
AT1G16860	0.533034	0.533089	5.67593	0.000752238
AT1G16900	0.53069	0.530828	4.45768	0.00542052
AT1G16905	2.77446	2.77952	1.92264	1.53543e-06
AT1G16930	0.637649	0.637999	3.26856	0.000497375
AT1G17020	1.26572	1.26705	3.3631	5.20804e-05
AT1G17030	1.59805	1.60341	1.13562	0.000159846
AT1G17080	0.437734	0.437792	5.3606	0.0168738
AT1G17090	0.709253	0.709942	2.55324	0.00375111
AT1G17170	0.729776	0.729821	6.43553	0.000370942
AT1G17180	1.14247	1.14253	6.7461	4.24571e-06
AT1G17190	1.09391	1.09405	5.18022	4.18664e-05
AT1G17285	1.9219	1.92664	1.62843	3.37805e-05
AT1G17300	1.4315	1.4326	2.5203	0.00010173
AT1G17310	2.03023	2.05081	-0.493597	0.000227255
AT1G17430	0.683182	0.68356	3.13143	0.00150999
AT1G17460	0.851175	0.853113	1.70163	0.00695228
AT1G17500	0.532301	0.532371	5.39306	0.00519844
AT1G17540	5.32757	5.44947	-0.113411	1.17158e-06
AT1G17550	0.762539	0.762645	5.63196	1.83415e-05
AT1G17620	0.747798	0.747868	5.7974	1.64567e-06
AT1G17710	10.5247	10.5354	8.57314	1.28746e-15
AT1G17730	0.4428	0.442891	4.7691	0.0109159
AT1G17745	2.36786	2.36799	7.3293	2.07806e-12
AT1G17750	0.816977	0.817892	2.54132	0.0137576
AT1G17760	0.522866	0.52298	4.88357	0.00193924
AT1G17830	2.86913	2.87024	4.55263	2.45375e-12
AT1G17890	0.891561	0.891666	5.4739	1.17748e-06
AT1G17950	1.33274	1.3353	1.5713	0.000879353
AT1G18100	1.67979	1.68466	1.72159	0.000523317
AT1G18140	0.941197	0.941623	3.29883	0.000237753
AT1G18150	1.21114	1.21127	5.79643	2.05037e-08
AT1G18180	0.680729	0.681381	2.32509	0.00379171
AT1G18360	0.43885	0.439113	3.70568	0.0181099
AT1G18410	3.0557	3.07261	0.793772	5.4969e-06
AT1G18420	1.33024	1.33074	3.91308	1.72299e-08
AT1G18470	0.696897	0.696978	5.54602	1.20794e-05
AT1G18550	0.87876	0.879288	3.08867	9.33101e-05
AT1G18570	0.622468	0.622707	3.70319	0.00757287
AT1G18590	1.15028	1.15045	5.48879	3.60724e-07
AT1G18710	2.362	2.38098	0.550962	0.000218821
AT1G18720	0.420455	0.420487	6.10073	0.018493
AT1G18840	0.425462	0.425535	5.04397	0.0132188
AT1G18870	3.10278	3.105	3.98106	1.56783e-07
AT1G18880	0.662933	0.663019	5.40786	9.47173e-05
AT1G18940	1.28471	1.28617	2.21901	0.00100829
AT1G18970	1.50751	1.50774	5.304	9.29754e-07
AT1G18980	1.03352	1.03364	5.61677	9.37491e-06
AT1G19115	2.10071	2.13668	-0.962852	0.00566175
AT1G19180	1.00657	1.00677	4.83918	2.21315e-05
AT1G19190	1.2108	1.21302	1.73907	0.000167369
AT1G19200	5.80477	5.81086	4.60401	2.28008e-14
AT1G19230	1.38455	1.38507	3.78956	5.94843e-07
AT1G19250	2.44243	2.44824	1.8271	0.000230743
AT1G19270	1.2841	1.28451	4.15988	2.2969e-08
AT1G19310	1.01876	1.0196	2.82784	3.99753e-05
AT1G19330	0.856602	0.857199	3.40453	0.0010874
AT1G19360	0.713823	0.71388	6.00136	1.61617e-05
AT1G19370	1.22001	1.2205	3.76783	3.38252e-06
AT1G19397	0.612929	0.613625	2.54105	0.00681063
AT1G19570	1.20091	1.20094	7.76006	5.17058e-08
AT1G19630	2.31503	2.32414	1.43282	9.83068e-06
AT1G19640	1.19142	1.19472	1.75917	0.00689263
AT1G19850	0.50061	0.500719	4.89629	0.0170005
AT1G19940	1.26014	1.26355	1.22424	0.00172206
AT1G19960	1.01623	1.0194	2.62593	0.0124511
AT1G20030	1.6632	1.66586	1.84805	2.41542e-05
AT1G20050	0.638781	0.638837	6.02978	3.73444e-05
AT1G20070	0.899454	0.89981	4.00855	1.53992e-05
AT1G20260	0.625326	0.625343	7.59547	4.87663e-05
AT1G20380	1.62547	1.62604	4.14893	1.85647e-08
AT1G20440	0.732806	0.732818	8.2058	0.00026893
AT1G20450	0.942238	0.942289	6.72335	0.000136639
AT1G20510	1.09765	1.09792	4.80998	5.85135e-07
AT1G20575	0.418626	0.418758	4.17741	0.0160448
AT1G20620	0.863661	0.863669	9.5772	0.000282985
AT1G20640	0.441962	0.442059	4.84602	0.00917204
AT1G20693	1.31384	1.31389	7.14327	1.56165e-08
AT1G20696	1.28132	1.28139	6.89115	1.07102e-09
AT1G20735	10.1631	1.44269e+08	1.01339	2.37402e-07
AT1G20840	0.892163	0.892228	6.1535	6.29781e-06
AT1G20860	12.3877	1.44269e+08	3.29749	2.32946e-12
AT1G20880	0.742679	0.742946	3.97442	3.23025e-05
AT1G20900	0.672745	0.672942	4.18776	0.000520726
AT1G20930	1.84749	1.84812	4.21916	3.11007e-10
AT1G20950	0.885435	0.885481	6.9344	0.000144954
AT1G21210	1.79922	1.80404	1.29946	0.000193234
AT1G21250	0.945946	0.946675	5.04585	0.0195197
AT1G21320	2.90001	2.90902	2.22562	1.03157e-06
AT1G21340	2.08389	2.11424	-0.972987	0.00913896
AT1G21360	1.56841	1.56964	2.63968	9.52936e-07
AT1G21370	0.464516	0.464637	4.33463	0.00803008
AT1G21380	0.424046	0.424088	5.82721	0.0147578
AT1G21390	0.850204	0.850766	3.17945	0.000508212
AT1G21440	1.14239	1.14249	6.31342	2.10331e-09
AT1G21670	0.663513	0.663659	4.56197	0.0030502
AT1G21750	1.3303	1.33034	7.6524	5.6243e-08
AT1G21760	0.834142	0.834305	4.94931	3.39805e-06
AT1G21890	2.84465	2.93181	0.113525	0.000856812
AT1G22065	1.21211	1.21284	3.50658	7.48686e-06
AT1G22070	2.48619	2.48682	5.02716	1.1406e-12
AT1G22110	2.44627	2.47265	-0.239752	4.63444e-05
AT1G22150	8.51369	8.56481	4.37056	5.67208e-15
AT1G22160	1.6862	1.68807	3.67931	1.87195e-06
AT1G22170	2.83818	2.83883	5.12329	1.02655e-14
AT1G22180	0.644133	0.644392	3.93412	0.000128047
AT1G22210	5.43816	1.44269e+08	-1.34464	0.0032453
AT1G22220	3.40155	3.40325	4.1307	6.3046e-13
AT1G22230	0.971347	0.971798	3.3687	1.86081e-06
AT1G22280	0.429471	0.429532	5.32659	0.0161917
AT1G22290	2.51446	2.53094	0.0629133	0.000245549
AT1G22300	0.568888	0.568901	7.89778	0.000410277
AT1G22360	0.929619	0.929721	5.88542	3.86011e-06
AT1G22370	0.850816	0.853424	1.79003	0.0149925
AT1G22410	2.02879	2.02883	8.59763	6.82557e-10
AT1G22440	0.488893	0.488956	5.45498	0.0190341
AT1G22460	1.39274	1.3956	1.27889	0.00121733
AT1G22470	0.811405	0.812703	1.64348	0.00562818
AT1G22640	0.575597	0.575753	4.50686	0.00277421
AT1G22840	0.394377	0.394392	7.32481	0.020555
AT1G22990	4.29307	4.30379	2.34439	4.17294e-10
AT1G23040	0.954988	0.955236	4.33532	8.78056e-06
AT1G23060	1.85778	1.86167	1.43409	7.36347e-05
AT1G23080	0.621977	0.62203	6.05905	0.00109049
AT1G23100	1.01073	1.01183	2.65329	0.000251402
AT1G23110	9.1068	9.1267	6.20808	3.4637e-17
AT1G23120	1.52919	1.53062	2.66587	7.9779e-06
AT1G23130	0.543109	0.543117	8.81163	0.0132521
AT1G23140	4.44863	4.45065	5.0679	1.38275e-13
AT1G23150	1.70846	1.70915	4.15831	7.37331e-08
AT1G23160	2.09446	2.10159	0.801756	0.000395848
AT1G23170	1.14788	1.14838	3.65651	7.44322e-06
AT1G23190	0.731968	0.731998	7.17408	1.11967e-05
AT1G23200	2.49386	2.49915	2.00459	4.2633e-07
AT1G23210	1.80284	1.80925	0.680682	0.000325285
AT1G23340	0.904216	0.904841	2.88776	0.000461121
AT1G23410	7.25838	7.34531	2.41483	0.000106692
AT1G23440	0.555267	0.555307	6.2115	0.00160995
AT1G23530	0.67338	0.673971	2.46389	0.0026312
AT1G23540	1.71881	1.7281	0.102438	0.000739202
AT1G23560	0.811156	0.81211	2.13288	0.0028063
AT1G23750	1.25501	1.25541	4.00464	1.10125e-07
AT1G23890	1.10788	1.10836	3.69819	1.65008e-07
AT1G24100	0.737749	0.737811	6.26533	5.5547e-05
AT1G24130	1.32562	1.32775	1.54847	3.58808e-05
AT1G24150	0.515188	0.515307	4.47222	0.00946875
AT1G24170	0.589451	0.589494	6.10478	0.000347862
AT1G24180	0.652469	0.65249	7.33477	2.64758e-05
AT1G24240	0.67891	0.679448	2.79661	0.00606588
AT1G24267	1.09375	1.09386	5.87358	3.46113e-09
AT1G24270	3.37648	3.48979	-1.04175	0.00022436
AT1G24320	1.05145	1.05274	1.98153	0.000420927
AT1G24430	1.31573	1.31699	2.62368	0.00015462
AT1G24575	3.7413	3.74417	3.95198	2.72076e-11
AT1G24620	1.81881	1.82429	0.872939	7.12049e-06
AT1G24625	0.554289	0.554637	3.47187	0.00311668
AT1G24735	1.87812	1.88102	2.1205	1.42971e-06
AT1G25180	4.07551	4.07752	4.58501	1.38461e-06
AT1G25220	0.986364	0.98655	5.15318	9.65534e-07
AT1G25240	3.1799	3.22151	-0.534695	0.000138975
AT1G25275	0.982105	0.982213	5.93618	7.9296e-05
AT1G25320	0.834751	0.835448	2.78779	0.000641801
AT1G25370	1.43449	1.43533	3.26546	8.02625e-07
AT1G25425	1.68981	1.69671	1.13083	0.000550485
AT1G25510	0.811864	0.812195	3.72647	0.000161177
AT1G25530	1.37919	1.37966	4.37264	1.80894e-07
AT1G25540	0.464827	0.464904	5.06453	0.0197246
AT1G25550	1.84106	1.84119	6.44966	1.08192e-10
AT1G25580	0.662273	0.662508	4.0484	0.000876438
AT1G26360	2.93351	2.9422	1.28394	1.21772e-06
AT1G26440	0.960486	0.960679	4.70492	2.01814e-07
AT1G26450	0.812724	0.81325	3.35738	0.00138198
AT1G26640	0.898617	0.898796	4.82112	3.71809e-07
AT1G26650	0.4561	0.456257	4.12437	0.00782593
AT1G26690	0.705724	0.705945	4.21142	0.0003478
AT1G26700	2.0586	2.06568	0.611022	0.000464614
AT1G26730	0.838635	0.840638	1.62599	0.011277
AT1G26762	4.1836	4.30189	-0.401264	3.90062e-06
AT1G26770	0.732094	0.73219	5.7785	0.00191468
AT1G26820	1.161	1.16138	4.05133	1.28763e-06
AT1G26870	1.38507	1.39655	-0.200647	0.0165284
AT1G26890	1.24771	1.25774	-0.229445	0.0109118
AT1G26900	0.560471	0.560961	2.67697	0.0129359
AT1G26920	0.439956	0.440078	4.45492	0.0198022
AT1G26960	0.499474	0.499688	3.50155	0.0133068
AT1G26970	1.65211	1.65433	2.11869	1.16175e-06
AT1G27030	1.33043	1.33057	5.97436	2.87825e-10
AT1G27110	0.892907	0.894083	1.94812	0.00349005
AT1G27140	2.22028	2.22108	3.95499	7.28739e-09
AT1G27200	0.984442	0.984566	5.33264	1.60475e-06
AT1G27300	0.43414	0.434269	4.44296	0.0116565
AT1G27330	0.685974	0.686071	5.47226	0.000185416
AT1G27350	0.759875	0.760006	5.06211	9.73174e-05
AT1G27380	1.36659	1.37078	0.784241	0.00121734
AT1G27450	0.468804	0.468823	6.99188	0.00473849
AT1G27530	0.572656	0.572704	6.1182	0.000184295
AT1G27630	0.874672	0.875002	3.9813	3.0058e-05
AT1G27660	1.32472	1.32602	2.62836	1.69455e-05
AT1G27670	0.732073	0.733656	1.17684	0.0179559
AT1G27720	2.00947	2.01276	1.90126	6.9143e-07
AT1G27740	1.42649	1.42854	1.84454	0.000114799
AT1G27760	1.2487	1.24875	7.3708	2.6279e-08
AT1G28050	0.826672	0.827192	3.34279	0.000199595
AT1G28090	0.911263	0.911477	4.56974	6.30495e-07
AT1G28135	1.4859	1.48642	4.07528	5.32481e-06
AT1G28170	1.95681	1.97057	0.0633299	0.00184274
AT1G28190	1.39316	1.39409	3.18926	4.09341e-06
AT1G28230	3.13017	3.14088	1.72883	4.7094e-09
AT1G28250	0.640569	0.64086	3.72027	0.000795016
AT1G28390	0.756681	0.757028	3.5634	3.98606e-05
AT1G28470	1.13638	1.1376	2.46526	3.08899e-05
AT1G28480	1.22569	1.22989	1.1322	0.00345912
AT1G28570	0.724841	0.725268	3.6281	0.00100647
AT1G28590	1.82721	1.84413	-0.301528	0.0017708
AT1G28680	0.97989	0.97997	6.14661	2.79014e-06
AT1G28815	0.8715	0.873376	1.29874	0.00496291
AT1G29000	1.17197	1.17583	0.894085	0.000656349
AT1G29025	1.14463	1.14493	4.1755	5.23481e-07
AT1G29050	0.569347	0.569446	5.00351	0.000268101
AT1G29160	0.784183	0.784777	2.98031	0.00138031
AT1G29195	0.908329	0.909712	2.06326	0.00227192
AT1G29230	2.55778	2.5666	1.10134	2.96418e-06
AT1G29270	0.797079	0.799713	1.41831	0.00502922
AT1G29280	0.906468	0.906574	5.51668	3.23895e-06
AT1G29290	1.28617	1.28947	1.33556	0.000484138
AT1G29300	0.517578	0.51773	4.02385	0.00591913
AT1G29310	0.754425	0.75451	5.5659	9.60592e-05
AT1G29330	0.683822	0.683974	4.52149	3.95208e-05
AT1G29355	0.535515	0.535682	4.32958	0.0124004
AT1G29395	0.873104	0.87516	2.01189	0.0156684
AT1G29400	1.0065	1.00656	6.86679	2.15958e-08
AT1G29540	7.59816	1.44269e+08	-1.17036	0.00322041
AT1G29640	0.650373	0.650667	3.71274	0.016146
AT1G29690	0.506783	0.506865	4.9261	0.00772298
AT1G29800	0.519932	0.520126	3.94435	0.00318621
AT1G29860	1.67298	1.69668	-0.21649	0.0195122
AT1G29980	0.862956	0.863216	4.38444	2.75164e-06
AT1G30040	1.02952	1.03035	2.72684	0.000175313
AT1G30050	1.51161	1.5225	-0.4219	0.0051529
AT1G30080	0.986704	0.987637	2.46453	0.000155923
AT1G30250	4.43665	4.5329	-0.138524	1.06429e-05
AT1G30300	1.02489	1.02536	3.69071	1.21106e-05
AT1G30320	1.41721	1.41751	4.82656	1.97581e-09
AT1G30420	0.698947	0.699124	4.64868	0.0143689
AT1G30475	1.02046	1.02209	2.14047	0.000989019
AT1G30500	3.20012	3.20169	4.28623	2.31624e-12
AT1G30510	1.37309	1.37318	6.63855	6.37398e-09
AT1G30530	1.04538	1.04544	6.94379	0.000651964
AT1G30550	2.81402	2.81689	2.8209	4.55105e-07
AT1G30560	7.14913	7.20004	2.93476	3.66435e-13
AT1G30620	0.958352	0.958666	4.09259	6.80426e-05
AT1G30630	0.602139	0.602176	6.56339	4.4557e-05
AT1G30640	0.702473	0.702654	4.35186	6.51021e-05
AT1G30750	1.03808	1.03834	4.11897	9.01067e-05
AT1G30760	0.879649	0.880693	2.52404	0.00182284
AT1G30840	0.880835	0.881051	4.34969	2.12766e-05
AT1G30845	0.673289	0.674526	1.65834	0.0165905
AT1G30850	2.36898	2.37544	1.21179	7.99267e-06
AT1G30870	2.41278	2.41301	6.0139	7.08686e-09
AT1G30900	0.981377	0.981565	4.64429	7.38729e-06
AT1G30990	1.54376	1.5474	1.00416	0.000113892
AT1G31120	0.513175	0.513258	5.0647	0.00114687
AT1G31320	0.493233	0.493772	2.73341	0.0173657
AT1G31470	0.77429	0.774779	3.06001	0.000260938
AT1G31480	1.23397	1.23421	4.83629	7.06655e-09
AT1G31550	1.53513	1.54038	2.02302	2.45854e-05
AT1G31580	1.80366	1.80378	7.76383	1.15286e-06
AT1G31720	1.10483	1.10989	0.189456	0.0134677
AT1G31750	1.49224	1.49766	0.922833	0.00103508
AT1G31830	0.434695	0.434816	4.40376	0.0113847
AT1G31850	0.807941	0.808012	5.97599	1.26082e-05
AT1G32127	0.603672	0.603958	3.40027	0.00840899
AT1G32130	0.387187	0.387213	6.46794	0.0168454
AT1G32170	0.709288	0.709386	5.0777	0.000550295
AT1G32210	0.44132	0.4414	4.95662	0.014008
AT1G32360	0.459178	0.45931	4.4866	0.00775471
AT1G32560	4.55129	4.98023	-1.53433	0.000407838
AT1G32900	0.618528	0.618535	9.03173	0.00697942
AT1G33090	2.56565	2.56917	2.47896	1.57328e-08
AT1G33100	2.43249	2.4536	0.144028	9.55742e-06
AT1G33230	0.401407	0.401478	5.07726	0.0154383
AT1G33280	2.07781	2.08139	1.80598	3.80382e-05
AT1G33340	0.859151	0.860967	1.66771	0.00634165
AT1G33440	0.808671	0.809826	2.08145	0.00654027
AT1G33540	1.84848	1.85837	0.157289	0.000291486
AT1G33590	0.95654	0.956588	6.95783	5.09507e-06
AT1G33670	1.32884	1.33834	-0.312803	0.0179476
AT1G33700	1.98138	1.98174	5.08335	1.82474e-09
AT1G33720	1.46002	1.46379	1.41261	0.000481039
AT1G33730	5.08314	5.51718	-1.57013	0.000203337
AT1G33750	1.46532	1.46587	3.89856	4.80427e-05
AT1G33780	1.35983	1.36005	5.22218	7.22855e-10
AT1G33800	1.87638	1.87664	5.33173	6.27853e-09
AT1G33890	5.11198	5.1826	0.519462	7.88159e-08
AT1G33970	0.887919	0.888418	3.64556	6.1296e-05
AT1G34040	1.10016	1.10062	3.72199	3.20726e-05
AT1G34060	2.6273	2.63289	3.33706	5.24153e-09
AT1G34065	0.590965	0.591673	2.52133	0.0122037
AT1G34130	0.540343	0.540409	5.51187	0.00252135
AT1G34260	0.698644	0.69879	4.86845	6.06794e-05
AT1G34270	0.519565	0.519961	2.87904	0.0191703
AT1G34340	1.45526	1.45599	3.87277	2.03649e-08
AT1G34350	0.56315	0.563464	3.38905	0.0174768
AT1G34510	3.27504	3.27941	2.59338	2.09145e-05
AT1G34520	1.99645	2.02069	-0.973028	0.00728282
AT1G34540	3.62049	3.65432	0.018135	8.68138e-05
AT1G34640	2.51837	2.52062	3.16694	9.90794e-10
AT1G34670	0.852197	0.852663	3.24887	0.000161951
AT1G34750	0.615614	0.615803	4.30555	0.000709339
AT1G35160	0.642035	0.642065	6.95025	3.74351e-05
AT1G35190	0.665682	0.665791	5.288	0.000243185
AT1G35250	0.78682	0.787463	2.91636	0.00332781
AT1G35260	0.708296	0.708702	3.50457	0.00122818
AT1G35310	0.979314	0.98229	1.76044	0.00804274
AT1G35330	1.1633	1.16499	1.71212	6.52949e-05
AT1G35720	3.37838	3.37841	10.1653	4.84475e-14
AT1G35780	0.551104	0.551213	4.86084	0.000614789
AT1G35910	2.23352	2.23852	2.27382	5.19753e-06
AT1G36060	1.29113	1.29157	4.2316	4.25829e-06
AT1G36940	0.954711	0.957859	1.01953	0.00904134
AT1G41830	0.883198	0.883238	6.92501	4.98512e-06
AT1G42480	0.80562	0.805933	3.91677	1.02582e-05
AT1G43010	2.28789	2.31209	-0.390101	0.000345841
AT1G43020	0.829903	0.830771	2.25811	0.00641391
AT1G43620	0.763194	0.763577	3.77401	0.00118972
AT1G43790	0.537297	0.537483	3.92731	0.00305025
AT1G43910	1.76607	1.76641	5.80116	4.06498e-07
AT1G44130	1.73372	1.74258	0.185842	0.00175797
AT1G44170	0.706314	0.706374	5.97485	1.34337e-05
AT1G44180	1.45759	1.46027	1.9389	5.5535e-05
AT1G44318	2.50427	2.52795	-0.596912	0.000366607
AT1G44608	0.915359	0.916351	2.29718	0.0009934
AT1G44820	0.458482	0.458559	5.09942	0.00816704
AT1G44970	1.1773	1.17787	3.48268	5.70253e-05
AT1G45130	0.795032	0.795106	5.83062	5.76461e-06
AT1G45145	1.49487	1.49493	6.8221	3.89486e-07
AT1G45231	0.724043	0.724581	3.1868	0.00204625
AT1G45249	1.73088	1.73109	5.68456	9.64682e-11
AT1G45545	1.00661	1.00831	2.01313	0.00153611
AT1G47128	0.475548	0.475551	9.56767	0.0152781
AT1G47130	1.38371	1.39653	-0.322161	0.0188169
AT1G47240	1.07274	1.07302	4.50482	1.97414e-07
AT1G47420	0.442193	0.442208	7.4365	0.00586952
AT1G47480	0.586955	0.587093	4.37727	0.00376114
AT1G47560	0.838403	0.839478	2.09646	0.00136002
AT1G47570	0.460877	0.461019	4.55799	0.00393096
AT1G47600	1.59498	1.5951	5.96184	2.10144e-07
AT1G47603	1.28922	1.29285	0.797539	0.00134757
AT1G47620	2.26098	2.2721	0.34913	1.14524e-05
AT1G47640	0.532873	0.53294	5.44335	0.0017277
AT1G47670	0.524125	0.524218	4.84604	0.00125735
AT1G47710	1.01926	1.01952	4.71912	3.51525e-08
AT1G47840	0.965119	0.965532	3.83364	2.36579e-06
AT1G47900	0.623093	0.623183	5.34125	0.000385476
AT1G47960	1.08071	1.0815	3.1191	6.26081e-05
AT1G48000	0.942639	0.945355	1.36907	0.0133748
AT1G48260	0.857289	0.857794	3.29866	0.000113145
AT1G48320	0.651634	0.651842	4.28347	0.0083435
AT1G48325	2.18315	2.22765	-1.36129	0.00531728
AT1G48330	1.24082	1.24244	2.0353	0.00017191
AT1G48370	3.23206	3.23365	4.22616	9.56667e-13
AT1G48500	1.33366	1.33474	2.88756	1.83904e-06
AT1G48510	1.61794	1.62009	2.20076	5.5292e-05
AT1G48600	0.411543	0.411554	7.79236	0.0123188
AT1G48640	2.02612	2.02986	1.54572	4.63944e-06
AT1G48670	1.25489	1.25755	1.43881	0.000102579
AT1G48870	0.873201	0.87445	2.15803	0.0133418
AT1G48930	2.80557	2.8062	5.0157	2.11865e-10
AT1G49230	1.58168	1.58686	0.911959	0.000820637
AT1G49410	0.416553	0.416622	5.15915	0.016462
AT1G49470	1.04959	1.04978	4.9802	3.02613e-07
AT1G49475	1.03601	1.03953	0.887779	0.00880229
AT1G49570	2.70639	2.71212	2.54701	3.0194e-06
AT1G49620	1.14172	1.14379	2.03562	0.000784573
AT1G49720	0.889726	0.890849	2.29158	0.00206567
AT1G49900	5.42525	5.45883	2.08493	3.43497e-12
AT1G49910	0.818097	0.819998	1.55248	0.0178914
AT1G49960	1.21746	1.21779	4.13843	3.63595e-07
AT1G50010	0.735334	0.735346	8.42954	2.24022e-05
AT1G50060	2.22714	2.22839	3.25455	0.000104446
AT1G50110	2.56998	2.57106	4.13384	5.92734e-11
AT1G50430	0.397529	0.397555	6.46505	0.0125339
AT1G50520	0.689751	0.690198	2.96948	0.004454
AT1G50580	0.922796	0.923926	2.18245	0.00306822
AT1G50630	1.04192	1.04214	4.50053	1.32916e-07
AT1G50670	0.481797	0.481872	5.20874	0.00572217
AT1G50930	1.44595	1.4508	0.634324	0.00141317
AT1G51035	1.7677	1.79204	-0.232419	0.00159525
AT1G51090	1.71929	1.73436	-0.101005	0.0126157
AT1G51140	1.16354	1.16389	4.80123	1.82717e-06
AT1G51170	1.02746	1.02807	3.47783	6.37775e-05
AT1G51260	1.20763	1.21163	0.479675	0.0198197
AT1G51420	1.25489	1.25513	5.15038	3.74896e-08
AT1G51470	1.6292	1.62934	5.86463	1.41004e-07
AT1G51510	0.413579	0.413628	5.6428	0.0105912
AT1G51610	1.39358	1.39413	4.08541	3.54771e-09
AT1G51630	0.403945	0.403993	5.67505	0.0162049
AT1G51650	0.663764	0.663786	7.48523	6.76015e-05
AT1G51680	1.01671	1.01673	7.95392	3.88905e-07
AT1G51760	0.70171	0.70178	6.08646	0.000172335
AT1G51770	2.05115	2.07425	-0.704323	0.000420484
AT1G51850	0.671131	0.671224	5.22551	0.000273413
AT1G51870	1.57691	1.58344	0.594068	0.00322418
AT1G51880	1.50702	1.50874	1.96496	1.29162e-05
AT1G52000	1.76191	1.7631	4.16545	2.68736e-06
AT1G52030	1.76934	1.7922	0.161232	0.0013134
AT1G52050	1.70686	1.70722	4.50122	8.49524e-05
AT1G52060	1.16957	1.16973	4.98863	0.00212856
AT1G52070	1.55954	1.55962	6.44241	0.00051925
AT1G52080	0.733432	0.733763	3.73618	0.00069797
AT1G52110	1.62612	1.64674	-0.862659	0.00497275
AT1G52120	6.23745	6.39961	1.33032	1.96236e-07
AT1G52155	0.576339	0.576784	2.80159	0.0148305
AT1G52240	1.11381	1.11551	1.96831	2.93872e-05
AT1G52280	0.529352	0.529489	4.4684	0.00259522
AT1G52400	0.875629	0.875759	5.69839	0.00298536
AT1G52410	0.614333	0.614675	3.74551	0.0150652
AT1G52540	0.41876	0.418831	4.83917	0.0196591
AT1G52565	1.09032	1.09134	2.74026	2.58739e-05
AT1G52600	0.429133	0.429221	4.88227	0.00910123
AT1G52660	2.37678	2.37933	2.45553	7.55398e-08
AT1G52690	4.27194	4.30076	2.56059	3.42794e-05
AT1G52720	0.562117	0.562303	4.27193	0.0041795
AT1G52760	0.704948	0.704988	6.71088	4.31907e-06
AT1G52800	3.99915	4.00755	2.2918	2.31563e-09
AT1G52855	1.51639	1.52552	0.671712	0.000880181
AT1G52890	7.27133	7.35524	2.66525	6.35503e-09
AT1G52910	1.17946	1.17996	3.64445	8.9014e-07
AT1G52940	12.9686	1.44269e+08	3.93309	1.23909e-10
AT1G53040	0.64357	0.643723	4.56769	0.000545633
AT1G53070	1.29153	1.29231	3.3387	2.22926e-07
AT1G53100	1.40869	1.41419	0.427202	0.000848603
AT1G53130	3.0268	3.04199	0.75343	5.70798e-07
AT1G53270	1.05764	1.05881	2.26198	0.00025842
AT1G53310	2.54419	2.54424	8.76736	1.24435e-12
AT1G53320	0.759367	0.759476	5.44702	1.68476e-06
AT1G53340	1.25599	1.25722	2.36957	3.71071e-05
AT1G53380	0.631302	0.631398	5.23534	2.88985e-05
AT1G53470	1.35419	1.35462	4.23486	4.19008e-05
AT1G53610	2.64953	2.65435	1.75436	1.87225e-08
AT1G53620	1.75111	1.76003	0.0888638	0.00169128
AT1G53633	0.653298	0.654149	1.72098	0.0160102
AT1G53645	0.456401	0.456478	5.25993	0.0191391
AT1G53660	1.57938	1.58448	0.743225	0.000110901
AT1G53680	0.922991	0.92335	3.4071	0.000203772
AT1G53700	0.942207	0.944224	1.47491	0.0204729
AT1G53708	2.18744	2.19711	0.4762	0.000862029
AT1G53790	0.548302	0.548929	2.58643	0.0134197
AT1G53830	1.1836	1.1838	4.71948	1.93918e-06
AT1G53885	1.15324	1.16098	0.278217	0.00397969
AT1G53903	1.15324	1.16098	0.278217	0.00397969
AT1G53920	1.24176	1.2424	3.50298	5.2386e-07
AT1G54000	1.66038	1.66042	7.78601	2.75294e-09
AT1G54010	0.487015	0.487031	7.5432	0.00602999
AT1G54030	0.921093	0.921158	6.46247	1.6413e-07
AT1G54040	1.39582	1.40215	1.43774	0.00133219
AT1G54095	1.68855	1.69083	1.89336	3.24329e-06
AT1G54100	0.546953	0.546974	7.37085	0.00413141
AT1G54120	0.864578	0.866124	1.70298	0.00406892
AT1G54160	1.26553	1.26806	1.98177	0.000205399
AT1G54180	1.03808	1.03887	2.86926	0.000424246
AT1G54215	1.82822	1.85301	-0.833983	0.0030892
AT1G54217	1.03142	1.03438	1.04115	0.0132803
AT1G54320	0.62252	0.622558	6.43777	5.74956e-05
AT1G54340	0.435842	0.435905	5.42189	0.0104986
AT1G54410	0.469748	0.469753	8.87453	0.0122168
AT1G54450	1.33359	1.33464	2.79597	2.55928e-07
AT1G54510	0.848968	0.849289	4.001	0.000191544
AT1G54530	1.9567	1.96046	1.62611	1.26139e-06
AT1G54540	0.870246	0.870755	3.10483	0.00806774
AT1G54570	1.19623	1.19654	4.7859	7.05365e-06
AT1G54575	2.36071	2.3617	4.47037	7.20533e-11
AT1G54580	0.546394	0.546419	6.98318	0.00245957
AT1G54710	0.450524	0.450579	5.47875	0.00986619
AT1G54830	0.487019	0.487149	4.44085	0.00640406
AT1G54890	3.33932	3.34186	3.43267	8.16573e-10
AT1G54940	2.66812	2.67323	1.77668	3.50014e-07
AT1G54960	1.05878	1.05971	2.74957	0.000104262
AT1G54970	2.56357	2.56517	3.41533	8.82003e-05
AT1G54990	0.929599	0.929754	5.21546	1.01389e-06
AT1G55020	0.888624	0.888671	7.05447	0.000492749
AT1G55110	0.6411	0.641289	4.63813	0.00071818
AT1G55120	1.97408	1.97525	3.60974	2.89326e-09
AT1G55210	1.33911	1.33922	6.24618	6.55589e-09
AT1G55230	2.5535	2.60662	-0.769993	0.00610312
AT1G55240	1.49146	1.49286	2.46042	8.91289e-06
AT1G55280	0.756486	0.757365	2.45366	0.00392574
AT1G55290	1.92506	1.9289	1.3347	1.51174e-05
AT1G55320	0.892071	0.892247	5.13393	0.00411031
AT1G55420	0.774706	0.775813	1.81229	0.0135945
AT1G55440	1.78333	1.80376	-0.762518	0.0144441
AT1G55500	1.14977	1.14993	5.50431	4.33227e-08
AT1G55640	1.97187	1.99219	-0.713141	0.00248966
AT1G55700	2.30399	2.32054	-0.0543515	0.000174829
AT1G55730	0.718206	0.718387	4.39099	0.000182362
AT1G55740	0.809757	0.80994	4.73606	9.5495e-05
AT1G55760	0.527705	0.528102	3.10028	0.0088719
AT1G55775	2.8202	2.86033	-0.39573	0.000837845
AT1G55840	0.557963	0.558017	6.0136	0.000746341
AT1G55940	1.75357	1.75563	2.36722	1.25331e-06
AT1G56020	0.97628	0.976702	3.66255	2.36559e-06
AT1G56170	1.60248	1.60527	2.20593	3.92226e-06
AT1G56230	0.501386	0.501504	4.59581	0.00511082
AT1G56300	1.68774	1.6911	1.72714	0.000266836
AT1G56320	1.39763	1.39837	3.36451	8.81138e-06
AT1G56330	0.617939	0.617969	6.81348	8.32258e-05
AT1G56340	0.802431	0.802454	7.73945	2.76267e-05
AT1G56360	8.47351	1.44269e+08	-0.422231	3.65189e-07
AT1G56423	0.538859	0.539084	3.84885	0.00884164
AT1G56450	0.6777	0.677751	6.2812	2.00882e-05
AT1G56550	1.26469	1.26502	4.20601	2.76882e-06
AT1G56580	0.506298	0.506326	6.85282	0.00521523
AT1G56600	6.58188	6.58809	5.53773	3.67087e-13
AT1G56630	1.09674	1.09736	2.98513	1.79539e-05
AT1G56650	4.36795	4.37483	3.93144	7.49327e-10
AT1G56680	2.05912	2.06016	3.48382	2.18644e-06
AT1G56710	2.22642	2.24049	1.28914	3.92994e-05
AT1G57540	0.535152	0.535683	2.67469	0.0102839
AT1G57560	1.82185	1.82446	2.17571	3.64583e-05
AT1G57570	2.34905	2.3557	1.34144	5.25042e-07
AT1G57590	1.46713	1.46818	2.95156	0.000595184
AT1G57600	0.538585	0.538814	3.69484	0.0120939
AT1G57620	0.566095	0.56624	4.35499	0.002661
AT1G57700	0.57928	0.579592	3.39104	0.00981706
AT1G57765	0.444762	0.444913	4.08592	0.0118697
AT1G57830	6.70491	1.44269e+08	-1.63873	0.000164249
AT1G58007	1.49381	1.50065	0.537286	0.00388832
AT1G58080	0.540724	0.540745	7.14409	0.000659103
AT1G58170	0.763117	0.763891	2.45282	0.00912175
AT1G58270	1.19945	1.19948	7.37177	1.12597e-06
AT1G58280	3.38421	3.3848	5.98302	2.70533e-14
AT1G58300	2.54905	2.59167	0.103774	0.00102597
AT1G58330	3.80569	3.86503	-0.362028	3.80784e-05
AT1G58410	1.30033	1.30233	2.29818	4.46392e-05
AT1G59510	0.793013	0.794985	1.52322	0.0114581
AT1G59640	1.26381	1.26595	2.22614	2.171e-05
AT1G59660	0.797851	0.798412	3.13839	0.0120969
AT1G59725	2.82583	2.83935	0.68335	2.51631e-06
AT1G59730	1.29045	1.2944	1.33651	0.000573151
AT1G59850	1.17159	1.17233	3.23125	2.26929e-05
AT1G59940	1.74322	1.74461	2.94692	9.5281e-06
AT1G59970	0.658446	0.658735	3.70607	0.000666398
AT1G60030	1.01825	1.02094	1.26212	0.00312205
AT1G60050	2.19541	2.21566	-0.461209	0.000882035
AT1G60140	0.663495	0.663546	6.02799	0.000161433
AT1G60190	2.57305	2.57485	3.70077	7.33473e-06
AT1G60280	7.55376	1.44269e+08	-1.39278	0.000494547
AT1G60420	0.433316	0.43335	6.09126	0.00722095
AT1G60450	4.9976	5.02542	1.71002	2.96681e-11
AT1G60470	2.107	2.11149	2.49369	1.59525e-05
AT1G60680	1.31688	1.31715	4.7804	4.01136e-08
AT1G60810	0.986468	0.986586	5.3962	9.34328e-07
AT1G60860	0.981036	0.981341	4.25652	9.2597e-05
AT1G60960	0.693524	0.693628	4.99854	0.00050208
AT1G60989	1.05872	1.05915	4.02415	1.27886e-05
AT1G61050	0.796623	0.797184	2.84041	0.0113689
AT1G61080	3.1359	3.14222	2.05988	1.24196e-07
AT1G61230	2.1578	2.17003	0.241562	0.000124723
AT1G61240	0.467048	0.467231	3.85765	0.0106537
AT1G61255	1.3326	1.33958	0.684307	0.00561608
AT1G61260	0.551246	0.551595	2.92081	0.0200861
AT1G61270	2.58842	2.64178	-1.36027	0.00334078
AT1G61340	1.10284	1.10406	2.25729	0.000141719
AT1G61410	1.59199	1.59953	0.26349	0.00137933
AT1G61560	0.599478	0.599585	4.73754	0.00289044
AT1G61600	0.617756	0.618439	2.58875	0.00887729
AT1G61770	0.407538	0.407583	5.57525	0.0102393
AT1G61795	0.980175	0.981211	2.56615	0.000438344
AT1G61800	5.83597	5.83925	5.78079	2.19052e-09
AT1G61860	1.57777	1.58021	1.78498	6.71455e-06
AT1G61930	1.38345	1.38515	2.17314	4.59245e-06
AT1G61950	2.88773	2.89656	1.28316	4.43464e-06
AT1G62045	0.943208	0.944511	2.03197	0.00107639
AT1G62200	0.605309	0.605421	4.92869	0.000182118
AT1G62262	1.48024	1.49413	-0.152513	0.00612781
AT1G62300	0.639259	0.63933	5.43798	0.00304266
AT1G62305	0.660682	0.661203	2.84456	0.00329665
AT1G62310	1.2246	1.22488	4.73317	1.95656e-07
AT1G62320	1.53061	1.53185	2.63638	2.42876e-06
AT1G62330	0.511749	0.511871	4.68741	0.00509308
AT1G62370	0.824419	0.824928	3.1961	0.00153811
AT1G62422	0.583012	0.5832	4.20706	0.00974525
AT1G62430	1.08865	1.08898	4.46746	1.1208e-07
AT1G62440	1.58097	1.58215	2.96327	9.92474e-05
AT1G62540	3.88847	3.89119	4.31666	5.09935e-13
AT1G62560	1.13121	1.13142	5.25478	1.2006e-06
AT1G62570	1.59113	1.59121	6.63463	2.2928e-09
AT1G62610	0.504832	0.505097	3.49681	0.011161
AT1G62660	0.735031	0.735045	7.91355	5.35339e-05
AT1G62710	2.8607	2.8621	4.13363	7.26055e-10
AT1G62730	0.61983	0.62055	2.62184	0.0139619
AT1G62770	1.27356	1.27406	3.71031	4.18991e-06
AT1G62790	1.13816	1.13826	5.92106	9.23149e-09
AT1G62800	0.89309	0.893245	5.07632	1.68122e-06
AT1G62880	0.64568	0.646077	3.21353	0.00101595
AT1G62980	2.67118	2.67185	4.68815	8.80695e-09
AT1G62981	1.01496	1.01802	0.887189	0.00174624
AT1G62990	0.79573	0.79614	3.41939	0.000133883
AT1G63000	0.959878	0.959919	7.0535	1.28717e-06
AT1G63010	1.02517	1.02524	6.53771	4.62879e-08
AT1G63050	0.54688	0.547061	4.1672	0.00225001
AT1G63055	5.57288	5.80805	-0.387001	3.37309e-05
AT1G63220	1.01729	1.0175	4.59428	9.14441e-07
AT1G63440	0.590481	0.590651	4.3825	0.00256426
AT1G63450	1.74117	1.74223	3.0196	2.64989e-08
AT1G63460	0.518416	0.518515	4.75549	0.00204776
AT1G63530	0.896809	0.897493	2.63177	0.00105918
AT1G63550	2.31407	2.36524	-1.62051	0.00270691
AT1G63600	2.82211	2.83523	0.860278	2.42693e-06
AT1G63720	0.5747	0.57502	3.11786	0.0185674
AT1G63820	1.64087	1.64718	1.25474	9.3165e-05
AT1G63840	0.765752	0.765911	4.80124	0.000309815
AT1G63930	1.64148	1.64341	2.26594	7.18696e-07
AT1G64000	1.2834	1.28629	1.17593	0.000634437
AT1G64060	0.717204	0.717293	5.47299	9.33788e-05
AT1G64110	2.417	2.42351	2.38474	1.79608e-07
AT1G64160	3.80034	3.95341	-0.40614	0.000892812
AT1G64170	0.77183	0.772344	3.51447	0.00565409
AT1G64370	0.657073	0.657103	6.93248	0.000942529
AT1G64390	0.725859	0.725895	6.89865	0.000165625
AT1G64400	1.27063	1.27096	4.95449	4.34539e-07
AT1G64440	0.914055	0.914184	5.29217	3.55715e-07
AT1G64460	0.717287	0.717527	4.01917	3.94793e-05
AT1G64480	1.68771	1.70098	-0.42171	0.00210176
AT1G64590	3.14578	3.14611	6.14629	2.01525e-12
AT1G64650	0.900053	0.900114	6.33946	1.16742e-06
AT1G64660	0.912873	0.913078	5.1896	1.92383e-06
AT1G64710	0.683925	0.684135	4.87201	0.00221222
AT1G64890	1.37817	1.37952	2.5171	3.72134e-06
AT1G64900	0.477575	0.477638	5.96949	0.0146979
AT1G64910	0.880529	0.882759	0.845077	0.0119306
AT1G64920	1.23279	1.23391	2.35702	0.000124547
AT1G64930	2.37238	2.37658	1.87297	5.84689e-08
AT1G64970	1.1457	1.1462	4.76884	9.43224e-05
AT1G65020	0.523264	0.523416	4.36046	0.00229478
AT1G65040	0.564102	0.564196	5.21416	0.000984638
AT1G65060	1.78626	1.78643	6.30029	0.00101409
AT1G65180	1.38574	1.38816	1.7235	0.000196455
AT1G65270	0.445752	0.445798	5.71998	0.00430877
AT1G65310	1.2095	1.20969	5.02111	6.16962e-06
AT1G65380	0.973065	0.973515	3.57843	1.15804e-05
AT1G65570	1.53623	1.53744	2.73094	0.000681976
AT1G65610	1.5087	1.50898	4.77849	3.53178e-09
AT1G65690	0.678977	0.679102	4.82521	0.00726662
AT1G65820	0.801147	0.801182	7.02158	2.37251e-05
AT1G65840	2.27516	2.27522	8.0376	4.31302e-12
AT1G65860	0.739126	0.739369	4.43182	0.00406994
AT1G65890	3.07203	3.10698	0.352504	0.00178136
AT1G65900	1.12178	1.12292	2.41142	3.71672e-05
AT1G65920	0.804904	0.805392	3.42252	0.00621348
AT1G65980	0.616755	0.616772	7.89191	0.000597413
AT1G65985	1.40293	1.40355	3.79692	1.53574e-07
AT1G66020	1.52997	1.53422	1.11585	6.9106e-05
AT1G66110	5.24802	5.3303	0.501064	1.00637e-06
AT1G66270	1.70813	1.70815	8.85516	4.55799e-08
AT1G66280	1.31735	1.31738	7.44428	1.29348e-07
AT1G66380	4.56944	4.7999	-1.10198	1.25956e-05
AT1G66390	5.2799	5.30282	2.91057	9.84207e-08
AT1G66410	1.07876	1.07882	6.72209	8.09701e-08
AT1G66470	1.89734	1.89846	3.25816	2.14129e-07
AT1G66480	0.807646	0.808346	2.90546	0.00022218
AT1G66760	0.633697	0.633752	6.17595	0.000846891
AT1G66800	1.05499	1.05561	3.13682	0.000351342
AT1G66980	0.641996	0.642156	5.00625	0.000319717
AT1G67300	1.38619	1.38669	4.20585	3.99742e-08
AT1G67330	1.31681	1.31695	5.49038	1.46116e-08
AT1G67350	0.49353	0.49357	6.13898	0.00123612
AT1G67360	1.52767	1.5278	6.11478	1.34765e-08
AT1G67410	0.57787	0.578161	3.35445	0.00140902
AT1G67420	0.748872	0.749394	3.15391	0.00037205
AT1G67510	0.821841	0.822345	3.15073	0.000185268
AT1G67530	0.587085	0.587243	4.42585	0.000329609
AT1G67570	1.13126	1.13227	2.80976	0.00118543
AT1G67600	4.46882	4.47488	3.61285	3.66313e-12
AT1G67750	0.58025	0.580484	4.32397	0.013251
AT1G67760	1.64047	1.64609	1.03945	0.000322408
AT1G67785	0.45324	0.453285	5.87529	0.00838774
AT1G67810	2.56459	2.56533	4.64162	4.61505e-11
AT1G67820	0.744936	0.746055	2.1805	0.00156918
AT1G67850	0.517166	0.517368	3.90315	0.00460185
AT1G67920	3.66955	3.67435	3.17855	1.23083e-10
AT1G67940	0.858428	0.858673	4.36706	1.10651e-06
AT1G68050	0.959337	0.960398	2.54229	0.000589052
AT1G68150	0.675748	0.676131	3.08593	0.00193622
AT1G68160	0.5057	0.505938	3.64202	0.00657827
AT1G68300	0.43862	0.438675	5.47081	0.0156746
AT1G68330	1.03269	1.03448	1.56404	0.00444366
AT1G68340	0.606435	0.607255	2.23355	0.0104494
AT1G68390	1.18457	1.18722	1.46044	0.000401515
AT1G68450	1.63749	1.63888	2.79199	2.75784e-06
AT1G68470	1.18651	1.18793	2.48635	8.49788e-05
AT1G68490	0.480299	0.480353	5.65349	0.00659457
AT1G68500	1.12774	1.13044	1.4429	0.000652662
AT1G68600	0.602829	0.603312	3.19575	0.0123776
AT1G68650	1.14749	1.14806	3.57287	2.31177e-05
AT1G68670	1.84891	1.84907	6.27622	2.39519e-10
AT1G68680	0.643247	0.643485	4.04409	0.000129859
AT1G68740	3.41619	3.41672	6.16574	2.30432e-14
AT1G68750	4.90312	5.13555	-1.16808	9.36065e-05
AT1G68760	0.979758	0.980171	4.02473	3.0751e-06
AT1G68765	2.389	2.44809	-0.972967	0.00318316
AT1G68795	1.47884	1.48059	2.32063	2.63139e-05
AT1G68820	0.739645	0.739795	4.74785	2.64818e-05
AT1G68825	1.36328	1.37052	0.409193	0.00866054
AT1G68850	1.13575	1.13606	4.22029	1.38216e-05
AT1G68880	1.56109	1.56183	3.73912	6.33314e-08
AT1G69020	0.690977	0.691916	2.27893	0.00362193
AT1G69030	0.590877	0.591045	4.27549	0.000264796
AT1G69040	0.948746	0.948997	4.52599	0.000245024
AT1G69080	0.618639	0.619293	2.30077	0.0117355
AT1G69240	2.80879	2.81133	2.99626	2.7227e-10
AT1G69260	1.25767	1.25808	4.08733	2.65736e-05
AT1G69330	0.632956	0.633348	3.28146	0.00187663
AT1G69340	0.582019	0.582075	5.87999	4.52137e-05
AT1G69410	0.69465	0.694692	6.69804	5.20758e-05
AT1G69450	0.402331	0.402377	5.56137	0.0200862
AT1G69480	1.56346	1.56495	3.30361	3.3128e-06
AT1G69510	0.444696	0.444721	6.8	0.0088014
AT1G69520	0.732988	0.733814	2.52984	0.00166356
AT1G69580	0.650558	0.650832	3.82714	0.000571901
AT1G69600	0.650597	0.651206	2.37333	0.0118415
AT1G69790	0.920595	0.921896	1.83247	0.00299467
AT1G69810	0.770137	0.770313	4.42022	7.0755e-05
AT1G69830	0.988834	0.989302	4.43573	0.00569377
AT1G69850	0.588731	0.588802	5.75168	0.000166844
AT1G69870	2.07047	2.07067	6.27532	4.25358e-10
AT1G69880	1.70432	1.70947	2.50253	0.000718301
AT1G69920	1.76197	1.76544	1.55395	0.00260795
AT1G69930	4.02733	4.0359	2.70989	3.60288e-10
AT1G69990	2.12343	2.1631	-1.30301	0.00596459
AT1G70140	1.00899	1.00945	3.68076	2.38402e-06
AT1G70170	0.898675	0.898951	3.77713	0.000372411
AT1G70190	0.440168	0.440268	4.81454	0.00961148
AT1G70260	2.24049	2.27439	1.62585	0.000550156
AT1G70300	1.2049	1.20503	5.64125	8.2424e-09
AT1G70330	0.747689	0.747749	5.95254	1.48351e-05
AT1G70335	3.49923	3.54371	0.761825	0.00235721
AT1G70440	2.57257	2.57979	1.55986	1.9483e-06
AT1G70450	2.59578	2.61458	0.0388096	8.0416e-05
AT1G70460	2.11743	2.11826	3.88142	2.59516e-07
AT1G70560	0.682983	0.683172	4.31625	0.00578248
AT1G70640	2.34803	2.35996	0.276914	0.000127114
AT1G70770	0.633658	0.63368	7.34892	0.000164695
AT1G70800	3.4231	3.43382	1.54236	1.5514e-09
AT1G70830	0.555822	0.55586	6.57755	0.011091
AT1G70880	1.23851	1.24057	1.86183	9.95185e-05
AT1G70900	2.3834	2.38381	5.43783	5.18889e-12
AT1G70950	0.587052	0.587524	2.72297	0.0128433
AT1G70990	0.929972	0.93083	2.29355	0.000626936
AT1G71100	0.82187	0.82208	4.56615	0.000199191
AT1G71110	0.776917	0.777242	3.80722	0.000728549
AT1G71130	3.0908	3.09201	4.50468	2.65772e-12
AT1G71190	0.631621	0.6318	4.23458	0.00281363
AT1G71230	0.840369	0.841295	2.41178	0.00123935
AT1G71380	2.03866	2.04347	1.34379	6.60139e-05
AT1G71520	2.58237	2.59121	1.1282	6.93825e-05
AT1G71530	1.02849	1.02901	3.68279	3.11194e-05
AT1G71692	0.895787	0.896267	3.2616	0.000127889
AT1G71695	1.13584	1.1359	6.67488	2.8741e-07
AT1G71696	0.662484	0.662684	4.23673	0.00122364
AT1G71740	1.32123	1.32216	2.81091	1.37158e-05
AT1G71780	0.525636	0.525764	4.42958	0.00252079
AT1G71800	0.540734	0.540998	3.64915	0.003163
AT1G71830	0.444794	0.444988	3.77556	0.0189471
AT1G71940	0.724527	0.724842	3.69963	0.000267241
AT1G71950	0.458891	0.458973	5.05204	0.0164518
AT1G71960	0.658706	0.658854	4.60928	0.000277053
AT1G72020	0.674596	0.674628	6.93923	4.51706e-05
AT1G72070	3.42558	3.42818	3.82766	8.64294e-14
AT1G72120	0.728116	0.72893	2.44066	0.00431947
AT1G72125	1.23691	1.23817	2.30409	4.82772e-05
AT1G72140	0.648378	0.648638	3.68909	0.00212261
AT1G72230	1.12846	1.12874	4.33514	9.52737e-07
AT1G72280	0.665226	0.665903	2.61254	0.00676816
AT1G72330	0.533064	0.533249	4.30759	0.0151277
AT1G72500	0.388469	0.388506	5.93498	0.0191891
AT1G72510	0.471346	0.471371	6.60897	0.00979596
AT1G72630	0.513871	0.514172	3.55575	0.0181712
AT1G72650	0.592411	0.592492	5.45303	0.000209367
AT1G72690	0.761593	0.762657	2.02496	0.0017001
AT1G72700	0.641865	0.64191	6.21963	0.000620649
AT1G72730	0.915321	0.915483	4.98048	3.47961e-05
AT1G72830	1.51711	1.5177	4.04119	1.46836e-08
AT1G72870	0.685887	0.686652	2.14263	0.00548574
AT1G72890	3.15532	3.15706	4.14747	2.07785e-13
AT1G72900	1.8267	1.82729	4.54232	9.60097e-09
AT1G73000	5.66583	5.827	0.310017	9.3878e-09
AT1G73010	9.26682	9.2702	8.95917	4.55273e-17
AT1G73040	3.05975	3.08505	0.646212	1.16649e-05
AT1G73160	1.65452	1.65815	1.22667	2.00142e-05
AT1G73210	1.26237	1.26383	2.50945	7.07691e-06
AT1G73220	8.07214	8.07766	7.11628	1.36697e-14
AT1G73280	1.06298	1.06362	3.09742	2.72275e-06
AT1G73325	5.59718	5.63597	1.72205	9.80901e-07
AT1G73330	0.516836	0.516842	8.97666	0.0133294
AT1G73340	1.49887	1.5006	2.20785	9.9334e-06
AT1G73410	0.997989	0.999318	1.85266	0.000144652
AT1G73480	0.770871	0.77115	4.72941	0.00314591
AT1G73580	2.40436	2.40759	2.21898	1.27179e-07
AT1G73590	0.661878	0.662031	4.57734	0.00697169
AT1G73620	1.85589	1.85642	4.47248	1.18158e-07
AT1G73700	2.67294	2.69477	1.05733	1.09723e-05
AT1G73780	1.7532	1.75951	0.577891	0.000379475
AT1G73805	1.43607	1.44105	1.98729	0.00413698
AT1G73810	3.02824	3.03264	2.38407	1.14655e-09
AT1G73860	1.74131	1.74275	2.67943	4.51692e-07
AT1G73880	0.629617	0.629884	3.82243	0.00105764
AT1G73950	1.1121	1.11243	4.41149	2.56301e-07
AT1G73965	1.20067	1.20751	0.244058	0.0024103
AT1G73980	0.573412	0.573532	4.90657	0.000215548
AT1G74000	1.05424	1.05609	2.12377	0.000248699
AT1G74010	2.4188	2.42143	3.16667	1.75118e-08
AT1G74020	0.996099	0.996187	5.94695	9.08844e-07
AT1G74030	0.974608	0.974672	6.40318	2.41347e-05
AT1G74080	1.01265	1.01577	0.660488	0.00498284
AT1G74090	0.858154	0.858222	6.23927	5.79052e-06
AT1G74100	0.753533	0.753582	6.58884	2.08552e-05
AT1G74200	2.20243	2.20614	2.1761	7.49295e-08
AT1G74210	2.83557	2.83596	5.88133	1.72548e-13
AT1G74270	0.603014	0.603058	6.27942	0.000553423
AT1G74280	0.529604	0.529893	3.27538	0.00662845
AT1G74380	0.497631	0.49767	6.09612	0.00330679
AT1G74410	0.510691	0.510969	3.45722	0.01942
AT1G74460	1.32263	1.32278	5.46827	3.37582e-07
AT1G74490	0.962149	0.963545	1.88357	0.0013767
AT1G74500	1.89658	1.89752	3.61015	1.35381e-06
AT1G74710	1.23054	1.23091	4.7836	9.39401e-08
AT1G74810	2.59398	2.59609	3.61328	4.36033e-06
AT1G74830	2.44425	2.44868	1.78175	3.03162e-07
AT1G75140	0.545966	0.546292	3.38116	0.00478573
AT1G75160	4.29469	4.3553	0.109957	2.22912e-06
AT1G75270	0.518375	0.518428	6.07025	0.00465743
AT1G75280	0.549781	0.549824	7.2212	0.0127295
AT1G75290	0.866411	0.86818	2.05197	0.00151429
AT1G75390	2.28956	2.29003	5.24243	1.72933e-10
AT1G75400	0.567777	0.567849	5.46525	0.000383739
AT1G75540	0.571712	0.571756	6.07981	0.000210522
AT1G75590	1.33125	1.33462	1.40591	0.00165684
AT1G75620	1.58017	1.58165	2.41705	2.75707e-06
AT1G75780	1.31091	1.31101	5.91166	9.96137e-07
AT1G75830	3.69912	3.73871	1.10147	0.000142544
AT1G76020	0.562466	0.562792	3.3793	0.0122056
AT1G76070	0.703747	0.704112	3.32148	0.00172948
AT1G76090	0.453105	0.453127	6.56051	0.00904042
AT1G76185	0.709398	0.710206	2.25846	0.00325284
AT1G76200	0.479514	0.479547	6.35015	0.0105175
AT1G76260	0.589028	0.589287	3.67823	0.00078141
AT1G76410	1.53835	1.54117	1.67047	0.00019432
AT1G76430	6.08038	6.09421	3.72947	1.73653e-12
AT1G76470	2.09718	2.10625	1.45974	0.00197411
AT1G76500	1.11402	1.11473	3.09773	0.000331841
AT1G76520	0.846101	0.846167	6.45019	3.56517e-06
AT1G76550	0.740391	0.74047	5.68295	6.90304e-05
AT1G76590	1.11702	1.11874	2.22609	0.00237783
AT1G76680	0.567063	0.56708	7.6884	0.00685183
AT1G76690	1.20324	1.20337	5.67821	1.06462e-08
AT1G76760	0.523536	0.523889	3.01642	0.0186516
AT1G76790	1.16444	1.16464	5.30482	1.06744e-06
AT1G76952	1.52331	1.52916	0.851307	0.000264474
AT1G76955	6.12812	1.44269e+08	-0.403935	0.000124932
AT1G76960	3.48286	3.63314	2.19106	0.009044
AT1G76970	0.836037	0.836321	4.12461	0.000105976
AT1G76980	0.599006	0.599268	3.72188	0.00314288
AT1G77000	1.88809	1.88899	3.70336	3.13863e-10
AT1G77130	0.624308	0.624366	5.84481	1.86444e-05
AT1G77280	0.812727	0.812905	4.7148	1.26853e-05
AT1G77330	1.08253	1.08261	5.99752	9.42981e-06
AT1G77350	0.565445	0.565611	4.26413	0.000827704
AT1G77380	0.846406	0.846957	2.95322	0.000395857
AT1G77450	0.917536	0.917634	5.62896	1.77998e-06
AT1G77510	1.01508	1.01517	6.12645	2.75599e-07
AT1G77520	1.21659	1.21751	3.11601	0.000276788
AT1G77610	0.674827	0.674924	5.43844	3.88702e-05
AT1G77770	0.587925	0.58806	4.5521	0.000234746
AT1G77810	1.27677	1.27775	3.05302	3.0194e-06
AT1G77850	0.662563	0.662923	3.50445	0.000297726
AT1G77855	1.01193	1.01461	1.22173	0.011962
AT1G77890	0.621629	0.621923	3.57448	0.00430296
AT1G77920	1.43549	1.43585	4.98774	9.3676e-09
AT1G77960	2.53962	2.60001	-1.14077	0.00670017
AT1G78060	0.688131	0.688189	6.11057	1.69185e-05
AT1G78080	0.680391	0.680421	7.12501	3.69533e-05
AT1G78130	0.68841	0.688808	3.35832	0.000506326
AT1G78340	0.845197	0.845293	5.34455	0.00010985
AT1G78370	0.742058	0.742089	7.48522	6.75694e-05
AT1G78420	0.463162	0.463244	5.05603	0.00305304
AT1G78520	1.86842	1.87721	0.45745	0.000130038
AT1G78570	1.61564	1.61567	8.70832	0.000425924
AT1G78600	0.838227	0.838473	4.33413	0.000168565
AT1G78610	0.614965	0.615061	5.21807	0.000243026
AT1G78680	0.807608	0.8077	5.84642	2.76146e-06
AT1G78830	2.00369	2.00374	8.08554	3.9713e-09
AT1G78850	0.768749	0.768756	8.92978	0.00074185
AT1G78860	1.45249	1.45311	3.54418	2.44753e-08
AT1G78900	0.425664	0.425668	9.07933	0.0129591
AT1G78990	0.729315	0.729511	4.07817	0.00157098
AT1G79110	0.717311	0.71748	4.67354	0.00113618
AT1G79180	1.19451	1.19716	1.33796	0.000357667
AT1G79250	3.43866	3.45548	0.817587	5.26192e-08
AT1G79310	1.51393	1.51695	1.44571	9.7544e-06
AT1G79320	2.71125	2.71312	3.25751	5.05826e-09
AT1G79330	2.1522	2.15503	2.22931	6.37006e-09
AT1G79340	0.497656	0.497672	7.2842	0.000896495
AT1G79440	1.04203	1.04215	5.57362	2.43683e-07
AT1G79450	1.21356	1.21421	3.36154	5.31933e-05
AT1G79470	0.941723	0.941997	4.4524	1.53279e-05
AT1G79480	1.23011	1.23512	0.556809	0.0183642
AT1G79520	0.898393	0.898566	5.17637	7.02131e-05
AT1G79530	1.01754	1.01757	7.34916	1.02683e-06
AT1G79550	0.975017	0.975029	8.90508	8.57073e-07
AT1G79580	1.20703	1.2094	1.63951	0.00377824
AT1G79610	0.982886	0.98321	4.32654	2.52681e-06
AT1G79620	0.788255	0.788641	3.54569	0.000136133
AT1G79660	0.587574	0.587771	4.14846	0.0033625
AT1G79710	0.614982	0.615235	3.83635	0.00994178
AT1G79820	0.685932	0.686182	4.15174	0.000208568
AT1G79860	2.55719	2.56583	0.980061	4.15282e-05
AT1G79890	0.895836	0.898146	1.46881	0.00886862
AT1G79910	0.827303	0.828307	2.31706	0.00655858
AT1G80110	1.16808	1.17026	2.07352	0.000229983
AT1G80120	2.39939	2.40102	3.14537	3.33413e-09
AT1G80130	1.233	1.23342	4.64953	3.74534e-05
AT1G80170	0.749236	0.750005	2.52681	0.000855991
AT1G80230	0.452972	0.453011	6.08438	0.0056653
AT1G80240	1.89117	1.89144	5.23259	1.70769e-06
AT1G80270	0.569737	0.569848	5.07876	0.015797
AT1G80290	0.556564	0.556919	3.0906	0.00333503
AT1G80300	0.494549	0.494572	7.0938	0.00866361
AT1G80310	0.444287	0.444382	4.58167	0.0149732
AT1G80610	0.518255	0.518498	3.71893	0.00330254
AT1G80690	0.617974	0.61824	3.71777	0.000817038
AT1G80820	1.04803	1.04848	3.79608	0.000106955
AT1G80900	0.702003	0.702664	2.70043	0.00175662
AT1G80940	1.07452	1.07465	5.48582	8.85853e-07
AT1G80950	0.405454	0.405527	5.01596	0.0138063
AT2G01008	0.728122	0.729051	3.87661	0.011891
AT2G01140	0.481362	0.481372	8.26664	0.00639354
AT2G01150	1.82313	1.82376	4.05555	1.3718e-08
AT2G01170	0.92175	0.922135	3.88423	6.34222e-06
AT2G01275	1.15912	1.16239	0.83634	0.00547947
AT2G01350	0.424386	0.424434	5.77549	0.0104424
AT2G01460	0.609219	0.609343	4.77111	0.00152185
AT2G01505	1.0544	1.05566	2.44592	7.89971e-05
AT2G01540	1.11414	1.1144	4.54431	1.74405e-05
AT2G01580	1.03648	1.03893	1.13829	0.0149369
AT2G01660	0.973476	0.973906	3.61087	4.59992e-06
AT2G01670	1.0858	1.08587	6.72376	4.72583e-07
AT2G01880	3.10234	3.10344	4.57858	2.01132e-12
AT2G01890	0.872069	0.87217	5.53607	8.77488e-06
AT2G01990	1.15661	1.15758	3.01791	0.000242941
AT2G02020	0.619256	0.619499	4.05426	0.00149082
AT2G02050	0.465813	0.465852	6.03578	0.0100826
AT2G02100	0.647805	0.647842	6.55566	0.000494332
AT2G02130	2.28698	2.28705	7.67802	2.85171e-12
AT2G02230	0.624916	0.625334	3.30567	0.00689788
AT2G02240	2.24272	2.28774	-0.647966	0.00924845
AT2G02250	3.27903	3.31208	-0.180666	1.36962e-05
AT2G02300	1.62115	1.63039	-0.078867	0.0012957
AT2G02360	0.601141	0.601365	3.86936	0.000888022
AT2G02370	0.912589	0.913	3.63264	1.09555e-05
AT2G02390	0.611627	0.611673	6.28381	0.00215838
AT2G02570	0.475979	0.476042	5.49276	0.00564962
AT2G02630	1.27012	1.2718	1.97809	0.000240359
AT2G02680	1.0601	1.06069	3.30385	0.000257862
AT2G02690	1.19388	1.19796	0.734507	0.00422231
AT2G02810	0.62783	0.628115	3.88058	0.000782808
AT2G02850	1.65127	1.65185	4.3358	1.45595e-07
AT2G02960	0.753506	0.753589	5.51791	1.46547e-06
AT2G02990	6.14741	6.15555	4.54942	5.58868e-13
AT2G03090	0.415561	0.415621	5.48038	0.015224
AT2G03120	0.422866	0.422897	6.30948	0.00685585
AT2G03200	1.20112	1.20141	4.28196	4.61138e-07
AT2G03220	0.773649	0.773842	4.54466	6.07602e-05
AT2G03260	0.901425	0.903397	1.30751	0.00524623
AT2G03310	1.30051	1.30886	1.93828	0.000368132
AT2G03340	0.435499	0.435629	4.52025	0.0127256
AT2G03370	1.02517	1.02788	0.854805	0.00374367
AT2G03505	1.31291	1.31426	2.42969	3.72396e-05
AT2G03720	2.73328	2.73553	3.03623	4.29364e-08
AT2G03830	1.69696	1.70786	0.236676	0.000978229
AT2G04025	1.63221	1.63733	0.854258	0.000792526
AT2G04038	1.95348	1.97747	-0.732722	0.00103887
AT2G04090	1.01685	1.01808	2.30509	0.00108189
AT2G04100	0.842551	0.842892	3.79021	7.98098e-05
AT2G04160	1.7138	1.7139	6.95909	7.29873e-12
AT2G04170	1.96633	1.9666	5.47664	4.59728e-08
AT2G04240	0.724922	0.725344	3.56522	0.000601774
AT2G04340	0.561728	0.561985	3.65384	0.00326195
AT2G04350	0.560871	0.560913	6.46039	0.003157
AT2G04400	0.596017	0.59609	5.80518	0.000310438
AT2G04500	1.56806	1.57307	0.703764	0.00655361
AT2G04650	1.52107	1.52162	3.9326	5.48934e-08
AT2G04680	1.3712	1.37232	2.54909	7.03464e-06
AT2G04780	0.691628	0.691667	6.48834	1.79865e-05
AT2G05260	0.845656	0.845974	3.79528	1.65602e-05
AT2G05320	0.436248	0.436405	3.95102	0.0185201
AT2G05510	4.90041	4.90127	6.83574	9.53018e-10
AT2G05520	2.14619	2.14624	8.45341	5.11682e-08
AT2G05590	1.10253	1.10296	4.07317	7.83415e-07
AT2G05630	0.897723	0.898098	3.7862	7.50171e-05
AT2G05710	0.660199	0.660207	8.96281	0.000316108
AT2G05910	1.10514	1.10705	1.9203	0.00042086
AT2G06050	1.37844	1.37873	5.09062	2.05565e-08
AT2G06510	0.561436	0.561834	3.09601	0.0148099
AT2G07633	2.16134	2.25919	0.707553	0.0162764
AT2G07638	1.58486	1.60516	2.03051	0.00146063
AT2G07662	1.53087	1.53938	4.69116	0.000180856
AT2G07671	1.3998	1.40252	3.70138	4.188e-06
AT2G07672	1.53889	1.58696	1.80933	0.00841705
AT2G07674	1.20304	1.21078	2.46303	0.0021657
AT2G07684	2.13544	2.20115	0.645394	0.0192213
AT2G07687	1.82142	1.87092	0.351628	0.0157443
AT2G07698	2.10633	2.11538	2.44981	0.000253651
AT2G07722	1.83967	1.86299	5.25669	0.00109649
AT2G07727	1.18485	1.18855	3.24743	0.00120819
AT2G07728	1.82817	1.88076	1.72683	0.00803909
AT2G07739	1.31184	1.32028	4.10546	0.000109302
AT2G07774	1.42197	1.42863	2.4939	9.59528e-05
AT2G07777	0.873308	0.875517	3.78091	0.0127376
AT2G07815	1.50572	1.52811	2.11924	0.00933249
AT2G07827	3.3347	3.7416	-0.187118	0.00838867
AT2G10930	2.12577	2.13722	0.604312	4.27332e-06
AT2G11810	8.58721	8.59387	7.35896	5.91607e-16
AT2G12400	1.88975	1.88999	5.46291	1.83772e-10
AT2G12462	0.632705	0.633061	3.3714	0.0114125
AT2G12646	1.39715	1.39811	3.19918	0.000134127
AT2G13100	0.498249	0.498405	4.27223	0.00550205
AT2G13800	0.557928	0.558165	3.72993	0.00270968
AT2G13820	0.789327	0.789502	4.54989	1.19503e-05
AT2G14095	1.46953	1.47248	1.58556	2.92092e-05
AT2G14290	2.92048	2.97601	-0.874491	2.91828e-05
AT2G14520	0.849464	0.850496	2.33966	0.00153908
AT2G14560	4.29544	4.3757	3.78469	0.000485057
AT2G14680	1.36695	1.36725	4.71909	4.10357e-09
AT2G14720	0.414932	0.414961	6.39201	0.0081548
AT2G14750	1.21137	1.21145	6.71001	1.48552e-08
AT2G14760	2.00199	2.02051	-0.639483	0.00210368
AT2G14820	1.81343	1.81518	2.6811	7.65888e-06
AT2G14846	4.69715	4.85537	-0.960142	8.38356e-05
AT2G14860	1.43123	1.4333	2.39328	5.57283e-06
AT2G14900	0.920164	0.92053	3.91592	1.12991e-05
AT2G15010	4.72181	5.15255	-1.25876	0.000145483
AT2G15300	0.596891	0.597254	3.06384	0.0186097
AT2G15310	0.664515	0.665455	2.19035	0.00355286
AT2G15370	1.29785	1.29845	3.27305	4.96336e-05
AT2G15390	1.24321	1.24349	4.5225	9.90622e-07
AT2G15440	1.63852	1.64075	2.41582	6.71476e-08
AT2G15480	0.634648	0.634743	5.11418	0.000305874
AT2G15490	1.123	1.12312	5.88216	6.16978e-06
AT2G15560	0.785219	0.78542	4.56306	1.18822e-05
AT2G15570	0.534031	0.534182	4.22153	0.0013757
AT2G15780	6.1341	1.44269e+08	-1.31762	0.00175574
AT2G15830	1.64766	1.6489	2.8147	2.5956e-06
AT2G15860	0.500077	0.500171	5.02087	0.00209154
AT2G15970	0.956541	0.956577	7.19123	0.00388723
AT2G16005	3.14593	3.14727	4.21732	8.39582e-06
AT2G16050	0.968362	0.969696	2.30631	0.000165992
AT2G16230	1.52739	1.52963	1.7604	0.000225305
AT2G16385	1.60828	1.61261	1.80478	6.20965e-06
AT2G16430	1.46796	1.46806	6.45827	2.3403e-08
AT2G16570	1.35736	1.35836	3.32198	8.21777e-05
AT2G16595	1.47981	1.48055	3.54339	1.32691e-08
AT2G16600	0.857964	0.857984	8.0541	1.9969e-06
AT2G16660	0.67972	0.679977	4.83754	0.000275577
AT2G16740	0.868161	0.868347	4.90282	2.51152e-06
AT2G16750	0.735271	0.735521	3.86045	0.0013132
AT2G16760	1.47638	1.47725	3.22173	3.03584e-06
AT2G16790	0.577363	0.577657	3.39398	0.017972
AT2G16970	1.1239	1.12557	1.75027	0.000196466
AT2G16980	0.856155	0.856596	3.16112	0.00139993
AT2G17030	0.546184	0.546503	3.34544	0.00841273
AT2G17070	1.57638	1.58627	-0.0878532	0.00258854
AT2G17080	1.91161	1.91749	1.00475	0.000106319
AT2G17130	0.56862	0.568675	5.76006	0.000426583
AT2G17140	0.754066	0.755129	2.13623	0.0142039
AT2G17190	0.665927	0.665969	6.48909	4.39822e-05
AT2G17265	0.457898	0.457948	5.69023	0.00457909
AT2G17280	4.02211	4.02331	5.33766	7.07916e-13
AT2G17290	0.540186	0.540239	5.77998	0.000721208
AT2G17370	0.620268	0.620454	4.22136	0.0010225
AT2G17390	0.551997	0.55202	7.03492	0.0002764
AT2G17560	0.659947	0.660001	6.0322	0.000103296
AT2G17590	1.38958	1.39316	0.801421	0.00630719
AT2G17630	0.973178	0.973401	4.5485	3.14183e-05
AT2G17660	3.87146	3.96557	-0.752184	0.000300991
AT2G17700	0.79223	0.792446	4.56396	2.15673e-05
AT2G17720	1.10098	1.10105	6.32693	3.86814e-08
AT2G17760	0.610029	0.610113	5.36511	0.00136819
AT2G17770	1.13225	1.13932	0.209588	0.0194662
AT2G17790	0.725801	0.725875	5.78835	4.00948e-05
AT2G17840	1.10609	1.1062	5.65909	1.83036e-07
AT2G17890	1.84442	1.8543	0.0234208	0.00061855
AT2G18040	0.768847	0.768896	6.57318	2.52644e-06
AT2G18050	3.23211	3.23313	4.58408	2.75738e-11
AT2G18100	0.829045	0.830246	1.83194	0.00265086
AT2G18130	10.078	1.44269e+08	1.03363	1.61442e-08
AT2G18150	2.44518	2.44748	4.00514	4.91614e-09
AT2G18170	0.797876	0.798142	4.22343	7.87171e-05
AT2G18196	0.956011	0.956961	2.61244	0.000504652
AT2G18230	0.53902	0.539129	5.18745	0.001534
AT2G18350	0.93827	0.939282	2.49282	0.00266374
AT2G18360	1.31126	1.3118	4.03756	3.11268e-05
AT2G18370	2.12532	2.12559	5.70412	2.64787e-09
AT2G18400	0.611735	0.612021	3.73429	0.0104729
AT2G18450	1.6407	1.64191	2.87128	2.25019e-07
AT2G18480	2.33273	2.34615	0.973354	1.31429e-05
AT2G18530	11.6932	1.44269e+08	2.66368	7.0175e-11
AT2G18640	2.52106	2.53584	0.134711	3.90284e-05
AT2G18660	6.87259	6.89094	4.32101	5.29574e-12
AT2G18670	1.56496	1.56653	2.66235	1.58349e-05
AT2G18690	0.820657	0.82074	5.64024	0.00357773
AT2G18730	1.1436	1.14372	5.9139	1.66471e-08
AT2G18800	0.929311	0.929827	2.95142	0.00072493
AT2G18840	0.675013	0.67523	4.18483	0.00014953
AT2G18980	1.26177	1.26186	6.21092	2.73962e-08
AT2G19160	0.53321	0.533307	4.87075	0.00206948
AT2G19170	0.576294	0.576535	3.83063	0.00434638
AT2G19350	0.737695	0.738435	2.57436	0.00206605
AT2G19410	3.05857	3.0738	0.624885	2.46832e-05
AT2G19450	0.75079	0.751019	4.17713	0.000409116
AT2G19570	0.531838	0.531926	5.13127	0.000872274
AT2G19660	0.989307	0.990771	1.78711	0.00343938
AT2G19670	0.822066	0.822441	4.00768	0.00295768
AT2G19690	0.93563	0.936953	1.9634	0.0013133
AT2G19760	1.12306	1.12309	7.46796	2.26598e-07
AT2G19810	2.01829	2.01918	4.02742	1.33002e-06
AT2G19830	0.448531	0.448566	6.20826	0.0109142
AT2G19860	1.01223	1.01242	5.19024	6.68901e-06
AT2G19880	1.55453	1.55465	6.26289	1.0731e-11
AT2G19890	6.38153	6.82232	-0.431177	4.75858e-07
AT2G19900	1.87585	1.8793	2.02146	3.23734e-05
AT2G19930	0.532887	0.533173	3.48049	0.0152584
AT2G20030	0.90353	0.904933	1.50316	0.00482454
AT2G20130	0.5367	0.536879	4.07284	0.0030075
AT2G20142	1.72856	1.73136	2.31594	7.0439e-07
AT2G20320	0.535253	0.535395	4.42208	0.00914291
AT2G20370	0.845412	0.845534	5.3086	3.8227e-05
AT2G20420	0.528517	0.528535	7.41253	0.000911298
AT2G20510	2.83575	2.86986	-0.577992	0.000409438
AT2G20515	1.24778	1.2484	3.34692	0.000176478
AT2G20520	3.52151	3.52802	2.34494	3.18271e-06
AT2G20562	1.28989	1.29101	2.50243	3.63971e-06
AT2G20610	0.596635	0.596666	6.88868	0.000251232
AT2G20630	0.824843	0.824894	6.46133	5.8022e-06
AT2G20650	0.722699	0.723057	3.44249	0.000104076
AT2G20680	0.607859	0.608257	3.10211	0.0115351
AT2G20750	0.770401	0.770639	3.92816	0.0010654
AT2G20760	0.486782	0.486804	6.88469	0.00137838
AT2G20770	0.632906	0.633772	2.15556	0.0204843
AT2G20780	0.611429	0.611562	4.77613	0.000104189
AT2G20800	2.53338	2.54274	2.88153	0.000233216
AT2G21030	2.18571	2.21671	-1.05033	0.000229749
AT2G21045	0.633079	0.633132	5.78449	0.000973415
AT2G21060	0.781001	0.781164	4.70171	0.000278018
AT2G21100	1.6838	1.68458	3.58198	5.84801e-07
AT2G21130	1.44644	1.44871	2.28926	3.2565e-06
AT2G21160	0.607734	0.607756	7.23826	0.000328477
AT2G21180	1.32418	1.32491	3.53678	3.96417e-06
AT2G21185	0.926156	0.926479	4.36539	2.12261e-05
AT2G21250	0.498249	0.498317	5.57105	0.00112724
AT2G21400	1.66127	1.68849	-1.09175	0.0137538
AT2G21510	1.84959	1.85854	0.378807	6.68943e-05
AT2G21550	0.867837	0.868538	2.82762	0.000405377
AT2G21610	1.34574	1.3514	0.198707	0.0075032
AT2G21620	0.821638	0.821691	6.44016	6.11184e-06
AT2G21650	1.12996	1.13108	2.9558	0.000961639
AT2G21660	1.24105	1.24109	8.02162	3.28769e-06
AT2G21840	0.454826	0.454978	3.75131	0.0161103
AT2G21850	0.6359	0.636139	3.70558	0.002583
AT2G21870	0.408831	0.408838	8.32483	0.02056
AT2G21880	1.67743	1.67835	3.25003	8.58651e-09
AT2G21900	2.3238	2.51881	1.13375	0.0101167
AT2G21940	0.540682	0.540912	3.89544	0.00342023
AT2G22080	1.94761	1.94784	5.85842	1.10983e-11
AT2G22170	1.36805	1.36809	7.37271	7.14939e-08
AT2G22190	1.26129	1.26246	3.1569	1.75603e-06
AT2G22240	1.08132	1.08141	6.80027	0.00050624
AT2G22250	0.912216	0.912373	5.41326	2.75574e-05
AT2G22290	2.73551	2.74778	0.598781	1.21452e-06
AT2G22430	0.601702	0.601735	6.9941	0.0020659
AT2G22470	2.03992	2.04001	7.05311	1.43056e-10
AT2G22475	0.49996	0.50008	4.4938	0.00184266
AT2G22480	0.992208	0.992327	5.61883	7.91062e-07
AT2G22500	1.32667	1.32679	5.75224	1.36543e-07
AT2G22510	1.14505	1.14522	5.04309	6.27254e-08
AT2G22560	1.5516	1.55214	4.01964	2.22455e-07
AT2G22590	4.0811	4.0881	3.46147	0.00177911
AT2G22620	1.09504	1.09584	2.97774	0.000253019
AT2G22690	0.661303	0.661722	3.148	0.00217134
AT2G22770	0.781988	0.782126	5.11081	3.17113e-05
AT2G22780	0.610549	0.610584	6.71721	0.000125853
AT2G22830	0.690503	0.691267	2.46258	0.0162725
AT2G22840	0.526351	0.526508	4.10399	0.014288
AT2G22900	0.891008	0.89125	4.4196	5.34758e-06
AT2G22920	1.16101	1.16137	4.06056	7.11259e-07
AT2G22930	1.59259	1.59356	3.14036	7.17672e-07
AT2G22950	7.62089	1.44269e+08	-1.27499	0.000124035
AT2G22970	1.16838	1.16859	4.79194	9.78412e-06
AT2G23000	1.24181	1.24227	4.75531	0.00698428
AT2G23010	2.78408	2.79035	2.60996	1.90766e-07
AT2G23050	1.63948	1.64023	3.78236	7.34844e-05
AT2G23120	1.36967	1.36974	6.82339	9.7156e-09
AT2G23210	0.870079	0.871984	1.25235	0.00820855
AT2G23300	0.662175	0.66249	3.45622	0.00300502
AT2G23340	1.0276	1.02798	4.14645	0.000230046
AT2G23400	1.40419	1.41065	0.164027	0.00406366
AT2G23410	1.6625	1.66392	2.58854	7.86008e-06
AT2G23540	1.21129	1.21137	6.1935	4.47969e-08
AT2G23560	0.64562	0.646151	2.71691	0.00682232
AT2G23630	2.47836	2.47955	3.75564	3.62807e-06
AT2G23790	2.54883	2.54913	5.98252	1.34232e-11
AT2G23910	2.7913	2.79223	4.94067	0.000361366
AT2G23950	1.11448	1.11465	5.27342	4.65955e-07
AT2G23960	2.47095	2.47559	1.84857	1.41055e-07
AT2G23970	1.90825	1.94261	-0.959128	0.0117523
AT2G24000	8.76441	8.88902	3.0956	2.98544e-12
AT2G24010	3.78729	3.81723	0.635356	1.54964e-07
AT2G24040	0.781132	0.781759	2.92414	0.000606697
AT2G24170	1.49242	1.49278	4.44041	5.37286e-07
AT2G24200	0.478995	0.479007	7.92004	0.00250396
AT2G24260	0.655136	0.655264	4.94273	9.74058e-05
AT2G24300	0.85275	0.853027	3.91429	0.000709156
AT2G24390	1.40116	1.40182	3.76484	9.0248e-08
AT2G24430	0.947474	0.948421	2.42776	0.00156482
AT2G24610	1.71511	1.71574	3.85071	9.94638e-08
AT2G24640	0.657159	0.657323	4.51881	0.000360863
AT2G24850	3.37426	3.41009	3.02323	0.00133556
AT2G24940	0.64249	0.642527	6.67453	0.00098433
AT2G24980	3.61806	3.61898	5.35026	5.71817e-07
AT2G25110	0.857552	0.85766	5.67408	1.30337e-05
AT2G25130	2.29476	2.30339	0.903797	4.00063e-06
AT2G25150	1.74935	1.75188	2.0066	0.000229539
AT2G25160	1.30441	1.30471	4.67042	1.95976e-05
AT2G25215	1.48803	1.50194	-0.816493	0.0105452
AT2G25240	3.40436	3.40759	3.20138	1.15057e-10
AT2G25250	0.478163	0.478289	4.33384	0.00891784
AT2G25260	1.22969	1.23001	4.27026	1.63992e-08
AT2G25297	1.51856	1.53322	-0.365046	0.0148774
AT2G25460	0.660758	0.661393	2.31362	0.0107903
AT2G25590	0.439839	0.439959	4.37925	0.02059
AT2G25625	1.75661	1.76088	2.30431	0.000383231
AT2G25690	1.83232	1.83317	3.76075	1.56708e-08
AT2G25737	1.00641	1.00675	4.08569	3.78223e-06
AT2G25770	1.02409	1.03188	-0.331435	0.0198102
AT2G25790	1.19784	1.19809	4.76765	1.76712e-07
AT2G25810	1.61043	1.6106	5.58058	1.06557e-07
AT2G25940	0.511877	0.512264	2.68075	0.0109326
AT2G25950	0.739309	0.739606	3.90013	0.00042514
AT2G25980	1.46327	1.4634	5.8959	9.50335e-06
AT2G26170	0.611081	0.611176	5.34035	0.000890893
AT2G26230	0.656168	0.656256	5.32785	4.81738e-05
AT2G26260	0.782196	0.782463	4.1632	2.02013e-05
AT2G26310	3.10109	3.10372	3.35322	1.1193e-10
AT2G26390	1.79186	1.80419	-0.0319023	0.00336889
AT2G26410	1.92045	1.92332	1.79951	1.29941e-07
AT2G26420	2.08109	2.08271	2.86675	1.41439e-07
AT2G26440	0.552546	0.552945	3.33671	0.00953173
AT2G26480	1.71901	1.72038	2.84803	2.05285e-07
AT2G26560	0.76272	0.762852	4.96438	0.0155982
AT2G26600	0.584254	0.584385	4.6765	0.00114571
AT2G26660	2.77565	2.77606	5.83946	4.03502e-14
AT2G26870	0.951551	0.952335	2.81243	0.000646782
AT2G27000	0.563408	0.563603	3.85753	0.0045698
AT2G27010	0.991437	0.992265	2.58777	0.000554402
AT2G27030	0.544084	0.54412	6.49021	0.000306546
AT2G27080	0.500388	0.500509	4.30414	0.00911288
AT2G27180	1.07796	1.08405	0.116452	0.00834072
AT2G27190	3.06821	3.06841	7.09158	5.94649e-15
AT2G27200	1.42444	1.42539	3.16896	8.71417e-08
AT2G27310	0.742657	0.742964	3.69181	4.97251e-05
AT2G27370	1.19608	1.19643	3.92904	2.35175e-05
AT2G27430	1.32195	1.32422	1.58118	5.94463e-05
AT2G27450	0.458431	0.458485	5.64654	0.0041449
AT2G27510	0.57201	0.572045	6.59003	0.000728035
AT2G27550	2.45569	2.45692	4.45272	1.17614e-11
AT2G27730	0.599201	0.599237	6.60988	7.52113e-05
AT2G28315	1.07518	1.07593	2.90859	5.33428e-06
AT2G28360	0.691661	0.69185	4.39269	0.00103883
AT2G28400	1.24423	1.24566	2.50924	1.64193e-05
AT2G28440	1.87039	1.87279	2.32205	7.84732e-07
AT2G28650	0.909573	0.912254	0.9659	0.010536
AT2G28660	2.26742	2.26851	3.80081	4.45454e-10
AT2G28671	0.803527	0.803578	6.15032	0.000185943
AT2G28720	0.680188	0.680432	3.93919	0.00196903
AT2G28740	0.689145	0.6893	4.69867	0.000435887
AT2G28760	0.895385	0.895632	4.31468	1.03756e-05
AT2G28790	0.752749	0.752897	4.90337	0.00774006
AT2G29000	3.52817	3.55304	0.469568	9.53495e-05
AT2G29070	0.610131	0.610535	3.14279	0.00826487
AT2G29100	2.44866	2.4788	-0.362289	0.000613152
AT2G29390	0.494862	0.494971	4.68432	0.00274161
AT2G29440	0.845618	0.846174	3.18208	0.00309884
AT2G29460	2.1121	2.11309	4.43916	3.28774e-05
AT2G29470	2.56389	2.6113	-0.384852	0.0127131
AT2G29490	0.922256	0.922395	5.30379	4.40482e-06
AT2G29500	0.819228	0.820181	2.82702	0.0046469
AT2G29525	0.811455	0.812173	2.74059	0.00167851
AT2G29560	0.632578	0.63268	5.12866	6.58772e-05
AT2G29620	1.70219	1.70348	2.73869	8.70579e-06
AT2G29660	0.635996	0.636153	4.45142	0.000560975
AT2G29670	2.64804	2.64857	5.80572	1.69926e-13
AT2G29730	0.502622	0.502805	3.83887	0.0160162
AT2G29750	1.72586	1.72604	5.59332	1.64556e-10
AT2G29960	0.558468	0.558527	5.67024	0.000274442
AT2G29980	0.862133	0.862167	7.37633	1.31805e-05
AT2G29990	0.767174	0.767617	3.51492	0.000204076
AT2G29995	0.81744	0.817932	3.12345	0.0016866
AT2G30050	0.407794	0.407833	5.76787	0.0194489
AT2G30060	0.517861	0.517911	5.97747	0.0015129
AT2G30130	1.01016	1.01274	1.47511	0.00409544
AT2G30210	1.19861	1.19872	5.75551	2.22746e-06
AT2G30220	3.09177	3.16662	-1.14423	0.00360779
AT2G30250	1.14458	1.14485	4.59222	1.98897e-07
AT2G30340	1.32658	1.32737	3.22822	4.79901e-05
AT2G30395	1.82867	1.8319	1.62345	2.08941e-05
AT2G30400	1.48941	1.49847	0.117701	0.00639955
AT2G30432	3.51356	3.59081	-0.99694	0.000136883
AT2G30440	0.548558	0.548576	7.38146	0.00115635
AT2G30490	0.944356	0.944365	9.22147	0.00232038
AT2G30505	0.734066	0.735628	1.42057	0.0144882
AT2G30530	0.528205	0.528325	4.82704	0.00322052
AT2G30540	3.47873	3.48043	4.45518	1.41326e-09
AT2G30550	1.72741	1.72781	5.06392	5.97566e-09
AT2G30770	3.22085	3.22854	2.35476	0.00013781
AT2G30840	0.992723	0.993212	3.58381	9.64424e-07
AT2G30860	1.41605	1.41606	9.79654	3.02131e-09
AT2G30870	1.57182	1.57184	8.80233	4.23284e-10
AT2G30920	0.439326	0.439543	3.56464	0.0185489
AT2G30930	0.818021	0.818082	5.93483	0.000652838
AT2G30933	1.49908	1.5052	1.02041	0.000210634
AT2G31020	0.54834	0.548494	4.03104	0.0135484
AT2G31083	1.43467	1.43845	0.837035	0.00408686
AT2G31085	1.64151	1.64751	0.416472	0.000966861
AT2G31110	0.572161	0.572494	3.47727	0.0036955
AT2G31180	1.07334	1.07903	0.76815	0.0195925
AT2G31200	0.505466	0.505542	5.34117	0.00841739
AT2G31230	1.90305	1.90508	3.18933	3.31818e-09
AT2G31260	0.53629	0.536372	5.15688	0.00119713
AT2G31310	1.8147	1.82598	-0.0314969	0.00179928
AT2G31350	0.653217	0.653278	5.8016	6.75002e-05
AT2G31360	1.29933	1.29942	6.38949	1.8017e-10
AT2G31390	1.05287	1.05291	7.30319	1.12937e-07
AT2G31480	2.07145	2.0996	-0.705552	0.00257189
AT2G31490	0.412614	0.412651	5.94626	0.0110558
AT2G31865	1.34863	1.34938	3.51389	2.33391e-05
AT2G31870	0.840928	0.841966	2.45016	0.000418229
AT2G31900	0.567212	0.567373	4.23211	0.00948783
AT2G31920	1.27846	1.28337	0.529121	0.00514077
AT2G31945	0.818492	0.82027	1.30471	0.00996126
AT2G31980	3.33564	3.34465	1.59582	1.06861e-08
AT2G31990	0.982422	0.983195	2.68856	0.000189843
AT2G32140	1.71668	1.72326	0.953802	0.000207461
AT2G32190	1.70931	1.71172	2.20934	5.99045e-05
AT2G32260	1.45315	1.45327	6.17345	1.50259e-09
AT2G32270	0.54364	0.543786	4.18048	0.0133627
AT2G32280	0.941451	0.942654	2.21881	0.000260676
AT2G32300	1.06135	1.06154	4.57345	9.95658e-06
AT2G32380	0.813834	0.814082	4.02548	6.78172e-05
AT2G32487	0.855639	0.857222	2.8273	0.0122648
AT2G32610	1.58008	1.58154	2.70019	3.35394e-05
AT2G32620	1.52525	1.52689	2.34298	2.28351e-05
AT2G32720	0.570749	0.570839	5.31258	0.00176565
AT2G32830	6.35433	6.38433	2.90237	3.59594e-10
AT2G32920	0.449269	0.44931	6.00961	0.00350474
AT2G32960	2.73544	2.73585	5.82347	2.50672e-12
AT2G32970	0.669593	0.669827	4.25036	0.000625192
AT2G32990	1.08942	1.08971	4.59542	0.000168826
AT2G33040	0.491298	0.491305	8.51025	0.00235734
AT2G33240	2.33254	2.33571	2.53573	7.14478e-08
AT2G33260	1.51613	1.52481	0.148568	0.00153872
AT2G33380	2.53335	2.5378	3.74642	4.57664e-06
AT2G33385	1.67526	1.68443	0.354482	0.000253757
AT2G33460	1.55227	1.55503	1.59352	1.92213e-05
AT2G33710	1.12471	1.12521	3.45648	8.30686e-07
AT2G33790	1.8632	1.86434	2.89766	4.54901e-05
AT2G34020	1.3589	1.35933	4.08928	2.59116e-05
AT2G34090	0.960253	0.961594	2.17078	0.000156814
AT2G34140	0.854096	0.855304	2.06775	0.000919192
AT2G34150	0.880768	0.881334	3.1021	0.00078059
AT2G34190	0.522387	0.522633	3.44809	0.0126857
AT2G34210	10.5236	10.7632	4.29439	6.7058e-14
AT2G34220	1.7845	1.80494	-0.105431	0.00836941
AT2G34250	0.506819	0.506828	8.31724	0.00261519
AT2G34300	0.596408	0.596453	6.21095	0.000553571
AT2G34325	2.20629	2.22474	-0.0356354	0.000771562
AT2G34355	1.03999	1.0406	3.41607	3.0339e-05
AT2G34410	0.520281	0.520414	4.43067	0.00692225
AT2G34470	0.408694	0.408736	5.85978	0.00782923
AT2G34585	0.928273	0.928407	5.32692	6.14479e-05
AT2G34655	2.55286	2.57156	0.402403	0.000110219
AT2G34720	1.10202	1.10215	5.70615	9.1984e-08
AT2G34790	1.19918	1.19953	4.24287	1.8455e-07
AT2G34810	2.08334	2.08381	4.88572	9.39403e-07
AT2G34830	0.743811	0.744317	2.70025	0.0133495
AT2G34910	1.59181	1.59279	3.06178	9.13908e-06
AT2G35060	0.851932	0.852006	6.19681	4.8423e-06
AT2G35120	1.08516	1.08523	6.40452	2.47881e-07
AT2G35140	1.16745	1.16999	1.52104	0.00243395
AT2G35190	0.915939	0.916158	4.5877	4.73866e-05
AT2G35210	1.95406	1.9585	1.28418	2.01617e-05
AT2G35380	1.20195	1.20219	4.64323	1.57564e-06
AT2G35585	0.975237	0.976628	2.02913	0.00063143
AT2G35605	0.640248	0.640523	3.92816	0.00285869
AT2G35610	0.74765	0.747707	6.09284	5.03686e-05
AT2G35635	0.683993	0.684053	6.02901	1.0637e-05
AT2G35710	0.534269	0.534549	3.10845	0.00523367
AT2G35730	1.79869	1.80277	1.46481	6.26373e-05
AT2G35770	1.18318	1.18373	3.51701	1.65172e-05
AT2G35810	0.810507	0.810689	4.75866	1.90178e-06
AT2G35890	2.87355	2.88715	0.73929	8.43063e-07
AT2G35990	2.6598	2.68058	-0.138875	0.00029507
AT2G36080	0.555132	0.555347	3.83102	0.00349071
AT2G36090	0.872732	0.873257	3.06114	0.00141853
AT2G36100	0.905607	0.905674	5.83031	0.000270239
AT2G36120	0.65329	0.653315	7.68027	0.000246264
AT2G36210	0.97048	0.97447	0.377512	0.0131442
AT2G36220	0.572797	0.57297	4.08404	0.0118506
AT2G36270	2.19502	2.20902	0.770874	6.37838e-06
AT2G36290	0.818032	0.818086	6.44712	0.000527553
AT2G36295	1.12129	1.12472	0.76194	0.00602901
AT2G36350	0.549569	0.54975	4.29613	0.00358583
AT2G36380	0.852063	0.852083	7.73747	5.32473e-05
AT2G36390	1.27632	1.27645	5.94189	5.29058e-09
AT2G36530	1.03193	1.03194	10.4774	4.99848e-07
AT2G36580	1.08741	1.08745	7.52397	2.09292e-08
AT2G36650	0.736562	0.737925	1.5912	0.015322
AT2G36724	9.36193	1.44269e+08	0.301798	5.16209e-08
AT2G36780	2.51889	2.52638	1.71462	7.46535e-06
AT2G36880	0.888933	0.888941	9.2867	9.16572e-05
AT2G36890	0.910758	0.911187	3.52627	2.25959e-05
AT2G36970	2.28899	2.28943	5.22365	6.38295e-12
AT2G37040	1.48432	1.48434	9.43206	0.000147875
AT2G37090	0.738662	0.739279	2.56404	0.00424918
AT2G37110	0.51388	0.513909	6.70269	0.00330569
AT2G37130	0.631755	0.631762	8.59064	0.000652296
AT2G37210	1.07359	1.07755	0.544856	0.00602203
AT2G37260	1.10324	1.10454	2.49321	0.000313681
AT2G37280	0.794337	0.794749	3.65148	0.00244843
AT2G37290	1.24813	1.24981	2.10164	0.0001624
AT2G37330	0.660933	0.661399	3.13408	0.004132
AT2G37360	0.741597	0.741743	4.68287	0.000118723
AT2G37370	2.67368	2.6862	0.777509	8.20549e-07
AT2G37430	1.09815	1.09994	1.57124	0.013331
AT2G37440	1.30094	1.30223	2.4963	9.02888e-06
AT2G37530	1.18296	1.18568	1.41253	0.00230567
AT2G37580	1.62677	1.62984	1.84941	1.13656e-05
AT2G37585	0.615973	0.616319	3.44564	0.00284453
AT2G37670	2.21357	2.21662	2.12665	1.24637e-07
AT2G37700	1.29573	1.2983	1.35109	0.00125068
AT2G37740	2.04887	2.06461	0.261034	0.000214296
AT2G37820	1.14894	1.15265	0.574981	0.0205751
AT2G37870	4.59437	4.6235	1.87238	6.00743e-08
AT2G37880	2.90247	2.91853	0.535124	1.09576e-06
AT2G37890	2.34423	2.3456	3.76069	1.32241e-11
AT2G37975	0.64484	0.645452	2.67781	0.00336069
AT2G37980	2.28687	2.28784	3.84581	4.00217e-09
AT2G38000	0.485106	0.485371	3.63211	0.014621
AT2G38010	1.27401	1.27462	3.84139	1.72868e-06
AT2G38060	1.9808	1.98301	2.39995	2.355e-06
AT2G38100	1.54712	1.55384	0.163221	0.00195039
AT2G38110	0.977377	0.977636	4.34402	1.05316e-06
AT2G38152	1.60559	1.61273	0.280502	0.00232455
AT2G38240	2.7246	2.83135	-0.820395	0.00480343
AT2G38340	2.73437	2.76808	-0.0235659	5.81891e-05
AT2G38360	0.970413	0.970615	4.6522	6.84252e-05
AT2G38380	1.47467	1.47471	7.57766	5.39227e-08
AT2G38490	1.24881	1.2545	0.193883	0.01414
AT2G38500	1.62543	1.6286	1.56124	2.48811e-06
AT2G38670	0.772289	0.772418	5.17031	5.62726e-05
AT2G38700	0.6568	0.656847	6.28819	8.04273e-05
AT2G38710	0.548961	0.549055	5.19877	0.00130337
AT2G38740	3.06413	3.06443	6.48041	3.72027e-14
AT2G38750	0.781448	0.781562	5.12897	0.000414735
AT2G38760	0.722271	0.722689	3.20225	0.000997216
AT2G38790	8.86547	1.44269e+08	-0.309705	1.18502e-05
AT2G38840	0.538403	0.538501	4.88416	0.0010614
AT2G38860	0.513325	0.51337	6.20339	0.00900528
AT2G38940	4.96323	4.96357	8.25291	3.53277e-15
AT2G39040	0.961557	0.961936	3.32908	0.000175529
AT2G39050	1.40342	1.40371	4.72471	7.06991e-08
AT2G39110	1.20856	1.20892	4.21885	2.34253e-07
AT2G39130	0.508577	0.508662	5.06205	0.00119523
AT2G39270	0.441397	0.441501	4.72762	0.00770708
AT2G39300	0.537471	0.537703	3.63899	0.00599124
AT2G39330	2.5732	2.6575	-0.140276	0.0120625
AT2G39350	1.23727	1.23774	4.34408	2.88272e-05
AT2G39360	1.02497	1.02517	4.75896	2.39653e-06
AT2G39370	1.76869	1.77144	1.82693	2.72507e-07
AT2G39420	0.918913	0.91908	4.74648	4.41059e-07
AT2G39430	1.02098	1.02112	4.9434	6.01605e-06
AT2G39510	2.61684	2.61757	4.76737	2.10981e-07
AT2G39518	1.18796	1.18846	3.46736	5.81189e-05
AT2G39530	0.746764	0.746968	3.84142	0.00108611
AT2G39700	0.772549	0.772604	6.50356	3.62629e-05
AT2G39705	0.725681	0.726217	3.22298	0.00416678
AT2G39725	0.987771	0.98967	1.83436	0.00200723
AT2G39770	1.04973	1.04976	7.76053	1.24028e-06
AT2G39780	1.63337	1.63347	6.62141	1.29751e-10
AT2G39800	3.39296	3.39316	7.75951	3.74063e-11
AT2G39890	0.876749	0.876904	5.17002	3.18785e-05
AT2G39900	1.2255	1.22577	4.55183	8.72565e-07
AT2G40080	1.26143	1.26186	3.75861	1.44097e-05
AT2G40110	1.1996	1.19979	4.90783	2.40021e-07
AT2G40113	1.41174	1.41254	3.18782	7.02804e-05
AT2G40130	1.05934	1.06036	2.58395	0.000162671
AT2G40160	0.764804	0.765519	2.46237	0.00196414
AT2G40170	2.46856	2.51071	-0.89622	0.00185686
AT2G40250	1.56463	1.57078	0.592654	0.000980052
AT2G40260	0.827158	0.827556	3.57434	4.41385e-05
AT2G40320	0.698151	0.698548	3.05145	0.000513815
AT2G40370	0.876223	0.876587	3.68375	0.00212937
AT2G40470	1.15292	1.15591	1.14791	0.00369231
AT2G40475	0.912567	0.912942	4.19597	4.24004e-05
AT2G40530	1.20929	1.21476	0.877328	0.00161825
AT2G40620	0.73003	0.730202	4.47109	8.22834e-06
AT2G40750	2.72215	2.72775	2.31433	3.66209e-08
AT2G40765	0.465112	0.46516	5.85857	0.00747528
AT2G40800	0.492196	0.492284	5.05128	0.00297649
AT2G40810	0.539022	0.539579	2.58062	0.0152426
AT2G40840	0.820235	0.820331	5.95907	0.000187444
AT2G41070	1.9852	1.98664	3.38064	1.7556e-09
AT2G41090	0.779763	0.779835	7.02769	0.00155631
AT2G41110	0.515727	0.515784	5.48508	0.0045701
AT2G41150	0.718799	0.719225	3.4304	0.00313043
AT2G41180	0.651723	0.652408	3.08115	0.0140551
AT2G41190	1.34376	1.34459	3.80871	0.000116661
AT2G41220	0.486319	0.486334	7.58638	0.0154106
AT2G41300	0.654441	0.655366	1.95943	0.017083
AT2G41380	0.722644	0.722705	5.91591	0.000117481
AT2G41451	2.3734	2.44191	-1.87324	0.00398327
AT2G41475	0.888411	0.88853	5.36286	1.81144e-07
AT2G41480	0.97833	0.978897	3.13827	4.50175e-05
AT2G41505	1.77294	1.78024	0.792468	0.000118311
AT2G41510	0.784388	0.785882	1.84573	0.011105
AT2G41540	0.509315	0.509389	5.31583	0.000573271
AT2G41660	0.645013	0.645071	5.65425	0.000816863
AT2G41690	1.5255	1.53339	0.168023	0.00299305
AT2G41780	1.12374	1.12434	3.3556	1.00445e-05
AT2G41800	2.59134	2.59211	4.56778	8.33534e-08
AT2G41810	3.38673	3.46331	-0.733152	0.000393774
AT2G41830	0.525513	0.52566	4.25413	0.00537671
AT2G41835	0.745064	0.745694	2.70547	0.00289682
AT2G41870	1.11624	1.11678	4.02728	3.8233e-05
AT2G41970	1.97618	1.9772	3.31943	3.59693e-10
AT2G42110	1.09038	1.09209	1.8869	0.000527862
AT2G42140	1.90188	1.91415	-0.101691	0.00038475
AT2G42350	1.13793	1.13825	4.02179	3.70957e-06
AT2G42360	0.978513	0.979659	2.38267	0.000321196
AT2G42390	1.2885	1.28888	4.28898	9.44273e-08
AT2G42430	1.57396	1.57897	0.945641	0.000108067
AT2G42530	3.79354	3.82874	0.29643	2.82974e-06
AT2G42540	5.44132	5.49688	1.95932	1.23947e-07
AT2G42570	0.932271	0.932442	4.81717	6.98857e-05
AT2G42600	0.660467	0.660479	8.44324	2.27748e-05
AT2G42670	0.846049	0.846599	3.27779	8.85293e-05
AT2G42690	1.01214	1.01219	6.90232	8.59058e-07
AT2G42790	0.632441	0.6325	6.00411	9.50045e-05
AT2G42850	1.36785	1.3699	1.90992	0.00191597
AT2G42890	0.517454	0.517531	5.18079	0.0108914
AT2G42960	0.681102	0.681666	2.89346	0.00264261
AT2G43020	0.481612	0.481704	5.3013	0.00696195
AT2G43040	1.19668	1.19709	4.01937	1.0256e-06
AT2G43060	0.940459	0.941003	3.46105	2.21386e-05
AT2G43070	0.441167	0.441214	5.68639	0.00337276
AT2G43080	0.514021	0.514127	4.77977	0.000615837
AT2G43100	1.38839	1.38849	6.61896	1.50456e-09
AT2G43120	1.61887	1.61958	3.7449	3.54351e-09
AT2G43230	0.878233	0.881066	0.688383	0.017375
AT2G43240	0.506808	0.506997	3.98282	0.00551226
AT2G43390	1.07334	1.07628	0.896309	0.00546675
AT2G43480	1.65969	1.66222	2.11262	3.95038e-05
AT2G43490	0.665849	0.666015	4.49715	0.00126532
AT2G43500	1.55699	1.55766	4.01155	2.7761e-06
AT2G43510	2.12824	2.129	4.62359	2.89759e-06
AT2G43530	1.21541	1.21688	2.89226	3.29327e-05
AT2G43535	4.19076	4.19113	7.20732	5.42157e-14
AT2G43580	1.95939	1.97966	-0.531042	0.00362212
AT2G43600	2.2106	2.2208	0.401294	0.000118298
AT2G43610	2.05501	2.05515	6.408	2.65605e-08
AT2G43670	0.922968	0.924192	1.89756	0.0099498
AT2G43700	0.948902	0.95039	1.84071	0.00110503
AT2G43840	0.899968	0.900888	2.436	0.000892719
AT2G43870	3.09576	3.10214	2.03141	5.20481e-09
AT2G43880	1.63976	1.64142	2.26856	0.00018084
AT2G43910	0.465561	0.465569	8.42116	0.0131787
AT2G43920	3.98165	3.98237	6.70501	1.10334e-15
AT2G43940	0.808025	0.808288	4.10572	1.14809e-05
AT2G43980	0.676998	0.677187	4.34959	5.1398e-05
AT2G44010	0.724218	0.724503	3.56126	0.00131635
AT2G44060	0.613335	0.613354	7.50158	0.000203549
AT2G44080	0.65343	0.653758	3.67812	0.00236337
AT2G44110	2.20289	2.20367	3.93935	1.8868e-10
AT2G44260	2.04401	2.04444	4.82674	7.43517e-12
AT2G44280	0.672016	0.672356	3.61045	0.00019876
AT2G44300	0.940994	0.941299	4.02794	1.14328e-05
AT2G44350	0.609202	0.609219	7.62986	6.64659e-05
AT2G44390	2.47417	2.53398	-1.31621	0.0140922
AT2G44430	1.10731	1.10752	4.74628	7.48362e-08
AT2G44450	2.08851	2.08894	4.85769	2.30036e-11
AT2G44460	3.81862	3.82959	4.51668	0.000344716
AT2G44500	0.531981	0.532028	5.69282	0.00115375
AT2G44578	2.12693	2.14073	-0.0234481	0.00199112
AT2G44660	0.430988	0.431163	3.91729	0.0151599
AT2G44790	0.522061	0.522069	8.05183	0.00591942
AT2G45040	1.19823	1.20181	0.717704	0.00145296
AT2G45050	0.922147	0.922649	3.29218	0.000224929
AT2G45120	0.636972	0.638001	1.69154	0.0180142
AT2G45130	10.9676	11.0244	6.55387	2.02799e-16
AT2G45135	9.11221	9.19651	4.23102	7.34365e-15
AT2G45200	0.419946	0.420058	4.47197	0.0147899
AT2G45220	0.87541	0.875447	6.66303	2.49218e-05
AT2G45290	1.35984	1.35993	6.46123	2.70103e-08
AT2G45400	0.408682	0.408758	4.79066	0.0178993
AT2G45430	0.855537	0.855679	4.97376	2.84664e-05
AT2G45510	1.1986	1.19886	4.85092	4.97599e-09
AT2G45550	4.87318	5.10544	-0.352266	3.88332e-05
AT2G45600	0.647524	0.648089	2.74493	0.0166022
AT2G45720	0.569895	0.57004	4.44474	0.00167483
AT2G45750	1.64217	1.64251	4.7409	1.27434e-07
AT2G45760	1.72361	1.74169	-0.414634	0.001304
AT2G45790	0.53594	0.535982	6.1417	0.000231749
AT2G45890	1.52666	1.5274	3.38321	3.60059e-06
AT2G45910	1.378	1.37816	5.75192	2.47198e-09
AT2G45920	0.769473	0.76963	5.02314	5.03877e-05
AT2G46000	1.0932	1.09352	4.24238	2.09195e-06
AT2G46130	1.8966	1.91177	-0.240495	0.000483253
AT2G46140	1.99601	1.99629	5.30184	6.82382e-11
AT2G46150	0.732142	0.732675	2.74287	0.000995182
AT2G46170	0.981225	0.981374	5.2232	2.34786e-07
AT2G46220	0.942443	0.942474	7.40792	0.00458239
AT2G46270	0.582037	0.582091	5.71192	0.00043696
AT2G46300	2.04846	2.07645	-0.822465	0.00208676
AT2G46370	0.617434	0.617471	6.51978	0.000243574
AT2G46375	3.08518	3.14157	-0.851031	0.00272156
AT2G46430	0.599691	0.599835	4.68186	0.00253523
AT2G46505	0.563626	0.563677	5.94972	0.000119749
AT2G46530	1.31589	1.31652	3.60839	3.08993e-07
AT2G46535	0.900539	0.900936	3.79968	0.000428381
AT2G46540	0.637652	0.637764	5.00848	0.000109035
AT2G46550	0.49397	0.494083	4.73549	0.0059791
AT2G46600	0.534027	0.534089	5.59374	0.018173
AT2G46620	0.616242	0.616384	4.38051	0.0027937
AT2G46640	0.651716	0.652436	2.44706	0.00753358
AT2G46650	1.61654	1.61671	6.05298	1.01812e-10
AT2G46660	1.7514	1.75247	3.30425	3.70931e-09
AT2G46680	0.880071	0.880383	4.58939	0.000253947
AT2G46690	0.882716	0.882834	5.29926	0.000107317
AT2G46740	0.91768	0.917833	4.84808	1.96093e-07
AT2G46760	0.777521	0.779144	1.32194	0.0137719
AT2G46850	1.56254	1.56669	1.15892	0.00121767
AT2G46860	4.29808	4.30396	3.39074	2.50549e-11
AT2G46880	13.9112	1.44269e+08	4.71742	6.59483e-11
AT2G46890	0.975292	0.975643	3.95945	6.66728e-06
AT2G46940	1.90095	1.90198	3.46498	1.37271e-06
AT2G46950	1.52282	1.52789	1.03649	0.000482568
AT2G47000	0.973045	0.973074	7.66199	1.02549e-05
AT2G47130	1.08555	1.08577	4.77624	2.16527e-05
AT2G47140	1.53577	1.53636	3.68457	3.11976e-07
AT2G47170	0.477296	0.47731	7.6653	0.00335999
AT2G47190	3.4998	3.55807	-0.285116	0.000426078
AT2G47200	1.37036	1.37099	3.48472	5.57662e-07
AT2G47270	1.05939	1.06012	2.86733	0.000123029
AT2G47320	0.536853	0.536912	5.60854	0.00046027
AT2G47360	1.77248	1.77327	3.51402	5.14618e-08
AT2G47380	0.595539	0.595622	5.45156	0.000446452
AT2G47460	0.634883	0.63499	4.74603	0.00117563
AT2G47470	0.753472	0.753498	7.40828	7.43349e-05
AT2G47530	2.39363	2.39737	1.88616	3.74279e-08
AT2G47540	1.92676	1.92742	4.01463	1.60223e-08
AT2G47550	1.93615	1.93728	3.23308	1.37022e-07
AT2G47650	1.23619	1.23626	6.56227	1.1746e-08
AT2G47670	1.2406	1.24391	1.05326	0.00129216
AT2G47690	0.555871	0.555949	5.41157	0.00348333
AT2G47730	0.686681	0.686688	9.20805	5.36976e-05
AT2G47770	2.40374	2.41733	0.897796	0.00121089
AT2G47860	0.917504	0.917887	3.73274	1.87941e-05
AT2G47890	0.544509	0.544588	5.09558	0.00315427
AT2G47950	2.60245	2.63557	-0.239558	0.00234041
AT2G48010	0.571935	0.572191	3.68066	0.00343169
AT2G48090	0.846607	0.847924	2.34152	0.000742509
AT2G48130	0.742881	0.74298	5.16913	0.000128595
AT2G48140	0.687574	0.687696	4.74858	0.00101788
AT2G48150	2.47172	2.48748	0.250192	4.54074e-05
AT3G01080	1.76495	1.77436	0.342823	0.0012833
AT3G01090	0.436948	0.436996	5.70992	0.00595394
AT3G01170	0.917798	0.918059	4.34396	3.84105e-05
AT3G01190	0.597236	0.597252	7.23319	0.00315749
AT3G01220	0.859589	0.859939	3.6626	0.000195034
AT3G01290	0.858082	0.858094	8.25304	0.000212517
AT3G01360	0.551927	0.552085	4.30661	0.000604494
AT3G01470	0.859339	0.859361	7.65146	5.25985e-06
AT3G01513	0.882758	0.883538	2.34561	0.000740603
AT3G01516	1.25396	1.25639	1.38841	0.00174882
AT3G01650	0.81366	0.813839	4.60779	1.39685e-05
AT3G01720	0.956642	0.95671	6.25218	7.64947e-07
AT3G01730	4.70144	4.74267	0.977483	1.22683e-08
AT3G01750	1.07342	1.07459	2.4801	0.000116785
[truncated: 6,745 more rows]

## Sheet: Supplementary Table 4
Enriched Gene Ontology (GO) terms in the up- and downregulated differentially expressed genes (DEGs) in LPi treatment relative to HPi.
Enriched GO Terms in Upregulated DEGs of LPi vs HPi										Enriched GO Terms in Downregulated DEGs of LPi vs HPi
	GO.ID	Term	Annotated	Significant	Expected	elimFisher	-logpval'	% of Sig. genes			GO.ID	Term	Annotated	Significant	Expected	elimFisher	-logpval'	% of Sig. genes
1	GO:0098869	cellular oxidant detoxification	165	70	26.64	8.6e-16	15.0655	0.424242		1	GO:0009658	chloroplast organization	204	138	28.64	< 1e-30	23.2291	0.676471
2	GO:0009737	response to abscisic acid	603	184	97.35	1.9e-14	13.7212	0.305141		2	GO:0015979	photosynthesis	282	185	39.6	5.9e-22	21.2291	0.656028
3	GO:0042744	hydrogen peroxide catabolic process	101	48	16.31	1.6e-13	12.7959	0.475248		3	GO:0010027	thylakoid membrane organization	52	36	7.3	1.7e-19	18.7696	0.692308
4	GO:0009414	response to water deprivation	424	132	68.45	2.6e-13	12.585	0.311321		4	GO:0015995	chlorophyll biosynthetic process	64	45	8.99	4.8e-19	18.3188	0.703125
5	GO:0016036	cellular response to phosphate starvatio...	81	41	13.08	6.8e-13	12.1675	0.506173		5	GO:1901259	chloroplast rRNA processing	23	22	3.23	3.3e-18	17.4815	0.956522
6	GO:0071555	cell wall organization	536	175	86.53	1.9e-12	11.7212	0.326493		6	GO:0009768	photosynthesis, light harvesting in phot...	22	20	3.09	1.5e-15	14.8239	0.909091
7	GO:0006979	response to oxidative stress	456	137	73.62	2.1e-12	11.6778	0.300439		7	GO:0010207	photosystem II assembly	27	22	3.79	6.5e-15	14.1871	0.814815
8	GO:0009699	phenylpropanoid biosynthetic process	123	62	19.86	2.2e-10	9.65758	0.504065		8	GO:0032544	plastid translation	21	19	2.95	9.5e-15	14.0223	0.904762
9	GO:0009651	response to salt stress	463	127	74.75	3.8e-10	9.42022	0.274298		9	GO:0045037	protein import into chloroplast stroma	29	22	4.07	9.4e-14	13.0269	0.758621
10	GO:0019761	glucosinolate biosynthetic process	50	29	8.07	8.7e-10	9.06048	0.58		10	GO:0009409	response to cold	409	114	57.43	1.4e-13	12.8539	0.278729
11	GO:0006099	tricarboxylic acid cycle	60	30	9.69	1.2e-09	8.92082	0.5		11	GO:0019253	reductive pentose-phosphate cycle	21	17	2.95	1.1e-11	10.9586	0.809524
12	GO:0048767	root hair elongation	70	33	11.3	1.3e-09	8.88606	0.471429		12	GO:0010239	chloroplast mRNA processing	10	10	1.4	2.9e-09	8.5376	1
13	GO:0055085	transmembrane transport	1371	380	221.33	2.7e-09	8.56864	0.27717		13	GO:0009773	photosynthetic electron transport in pho...	16	13	2.25	3e-09	8.52288	0.8125
14	GO:0009611	response to wounding	245	76	39.55	4.5e-09	8.34679	0.310204		14	GO:0010020	chloroplast fission	24	16	3.37	5.3e-09	8.27572	0.666667
15	GO:0009753	response to jasmonic acid	236	73	38.1	1e-08	8	0.309322		15	GO:0009416	response to light stimulus	779	253	109.38	7.9e-09	8.10237	0.324775
16	GO:0008643	carbohydrate transport	147	55	23.73	3.4e-08	7.46852	0.37415		16	GO:0009644	response to high light intensity	64	35	8.99	1.1e-08	7.95861	0.546875
17	GO:0006096	glycolytic process	72	35	11.62	4.5e-08	7.34679	0.486111		17	GO:0006782	protoporphyrinogen IX biosynthetic proce...	15	12	2.11	1.7e-08	7.76955	0.8
18	GO:0042546	cell wall biogenesis	235	86	37.94	7.3e-08	7.13668	0.365957		18	GO:0010206	photosystem II repair	13	11	1.83	2.4e-08	7.61979	0.846154
19	GO:0009749	response to glucose	68	29	10.98	1.9e-07	6.72125	0.426471		19	GO:0010114	response to red light	67	28	9.41	2.6e-08	7.58503	0.41791
20	GO:0009407	toxin catabolic process	46	22	7.43	5.2e-07	6.284	0.478261		21	GO:0007623	circadian rhythm	144	49	20.22	3.5e-08	7.45593	0.340278
21	GO:0006817	phosphate ion transport	40	24	6.46	5.6e-07	6.25181	0.6		20	GO:0048564	photosystem I assembly	18	13	2.53	3.5e-08	7.45593	0.722222
22	GO:0006749	glutathione metabolic process	60	26	9.69	5.7e-07	6.24413	0.433333		22	GO:0010190	cytochrome b6f complex assembly	8	8	1.12	1.5e-07	6.82391	1
23	GO:0071456	cellular response to hypoxia	240	68	38.75	1.2e-06	5.92082	0.283333		23	GO:0110102	ribulose bisphosphate carboxylase comple...	10	9	1.4	1.8e-07	6.74473	0.9
25	GO:1905582	response to mannose	9	8	1.45	3.5e-06	5.45593	0.888889		25	GO:0009089	lysine biosynthetic process via diaminop...	15	11	2.11	3.3e-07	6.48149	0.733333
24	GO:0006121	mitochondrial electron transport, succin...	9	8	1.45	3.5e-06	5.45593	0.888889		24	GO:0010196	nonphotochemical quenching	15	11	2.11	3.3e-07	6.48149	0.733333
26	GO:0009809	lignin biosynthetic process	51	22	8.23	4.5e-06	5.34679	0.431373		26	GO:0010167	response to nitrate	33	17	4.63	3.8e-07	6.42022	0.515152
27	GO:0009969	xyloglucan biosynthetic process	19	12	3.07	5.1e-06	5.29243	0.631579		28	GO:0045036	protein targeting to chloroplast	50	37	7.02	4.4e-07	6.35655	0.74
28	GO:0010150	leaf senescence	164	53	26.48	6.9e-06	5.16115	0.323171		27	GO:0006418	tRNA aminoacylation for protein translat...	58	26	8.14	4.4e-07	6.35655	0.448276
29	GO:0009226	nucleotide-sugar biosynthetic process	41	22	6.62	7.8e-06	5.10791	0.536585		29	GO:0042793	plastid transcription	16	13	2.25	8.7e-07	6.06048	0.8125
30	GO:0006970	response to osmotic stress	554	158	89.44	1.6e-05	4.79588	0.285199		30	GO:0019288	isopentenyl diphosphate biosynthetic pro...	11	9	1.54	8.8e-07	6.05552	0.818182
31	GO:0010345	suberin biosynthetic process	21	12	3.39	2.1e-05	4.67778	0.571429		31	GO:0000373	Group II intron splicing	29	15	4.07	1.7e-06	5.76955	0.517241
32	GO:0009738	abscisic acid-activated signaling pathwa...	288	79	46.49	2.9e-05	4.5376	0.274306		32	GO:0071456	cellular response to hypoxia	240	61	33.7	2e-06	5.69897	0.254167
33	GO:0035435	phosphate ion transmembrane transport	28	14	4.52	3.3e-05	4.48149	0.5		34	GO:0009767	photosynthetic electron transport chain	54	39	7.58	2.2e-06	5.65758	0.722222
34	GO:0019748	secondary metabolic process	379	164	61.19	3.5e-05	4.45593	0.432718		33	GO:0045454	cell redox homeostasis	40	18	5.62	2.2e-06	5.65758	0.45
36	GO:0009409	response to cold	409	97	66.03	4.1e-05	4.38722	0.237164		35	GO:0031425	chloroplast RNA processing	25	20	3.51	4.4e-06	5.35655	0.8
35	GO:0055062	phosphate ion homeostasis	19	11	3.07	4.1e-05	4.38722	0.578947		37	GO:0009772	photosynthetic electron transport in pho....	8	7	1.12	7.5e-06	5.12494	0.875
37	GO:0051555	flavonol biosynthetic process	26	13	4.2	6.4e-05	4.19382	0.5		36	GO:0009904	chloroplast accumulation movement	8	7	1.12	7.5e-06	5.12494	0.875
38	GO:0009744	response to sucrose	79	27	12.75	6.6e-05	4.18046	0.341772		39	GO:1902326	positive regulation of chlorophyll biosy...	6	6	0.84	7.6e-06	5.11919	1
39	GO:0051209	release of sequestered calcium ion into ...	9	7	1.45	7.6e-05	4.11919	0.777778		38	GO:0090391	granum assembly	6	6	0.84	7.6e-06	5.11919	1
40	GO:0034976	response to endoplasmic reticulum stress	108	40	17.44	8.4e-05	4.07572	0.37037		40	GO:0009231	riboflavin biosynthetic process	13	9	1.83	8.8e-06	5.05552	0.692308
41	GO:0042537	benzene-containing compound metabolic pr...	74	29	11.95	0.00013	3.88606	0.391892		42	GO:0009645	response to low light intensity stimulus	19	11	2.67	1e-05	5	0.578947
42	GO:0046274	lignin catabolic process	18	10	2.91	0.00015	3.82391	0.555556		41	GO:0045727	positive regulation of translation	19	11	2.67	1e-05	5	0.578947
44	GO:0009074	aromatic amino acid family catabolic pro...	28	13	4.52	0.00017	3.76955	0.464286		43	GO:0009646	response to absence of light	52	20	7.3	1.1e-05	4.95861	0.384615
43	GO:0006006	glucose metabolic process	58	21	9.36	0.00017	3.76955	0.362069		44	GO:0010205	photoinhibition	11	8	1.54	1.7e-05	4.76955	0.727273
45	GO:0042545	cell wall modification	145	44	23.41	0.00019	3.72125	0.303448		45	GO:0071482	cellular response to light stimulus	133	51	18.67	2.1e-05	4.67778	0.383459
46	GO:0030968	endoplasmic reticulum unfolded protein r...	32	14	5.17	0.00021	3.67778	0.4375		47	GO:0016123	xanthophyll biosynthetic process	9	7	1.26	3e-05	4.52288	0.777778
47	GO:0016126	sterol biosynthetic process	43	19	6.94	0.00026	3.58503	0.44186		46	GO:0042823	pyridoxal phosphate biosynthetic process	9	7	1.26	3e-05	4.52288	0.777778
48	GO:0048765	root hair cell differentiation	125	57	20.18	0.0003	3.52288	0.456		48	GO:0009793	embryo development ending in seed dorman...	414	88	58.13	3.6e-05	4.4437	0.21256
49	GO:0009718	anthocyanin-containing compound biosynth...	33	14	5.33	0.00031	3.50864	0.424242		49	GO:0032543	mitochondrial translation	32	16	4.49	5.9e-05	4.22915	0.5
51	GO:0003333	amino acid transmembrane transport	73	24	11.79	0.00032	3.49485	0.328767		50	GO:0010218	response to far red light	45	17	6.32	6.7e-05	4.17393	0.377778
50	GO:0009664	plant-type cell wall organization	157	55	25.35	0.00032	3.49485	0.350318		51	GO:0015994	chlorophyll metabolic process	90	57	12.64	7.3e-05	4.13668	0.633333
52	GO:0030244	cellulose biosynthetic process	65	22	10.49	0.00035	3.45593	0.338462		52	GO:0006364	rRNA processing	285	89	40.02	7.9e-05	4.10237	0.312281
53	GO:1901606	alpha-amino acid catabolic process	91	28	14.69	0.00037	3.4318	0.307692		54	GO:0009643	photosynthetic acclimation	10	7	1.4	8.7e-05	4.06048	0.7
54	GO:0046189	phenol-containing compound biosynthetic ...	34	14	5.49	0.00044	3.35655	0.411765		53	GO:0009903	chloroplast avoidance movement	10	7	1.4	8.7e-05	4.06048	0.7
55	GO:0006486	protein glycosylation	162	43	26.15	0.00049	3.3098	0.265432		55	GO:0071483	cellular response to blue light	30	13	4.21	9.2e-05	4.03621	0.433333
56	GO:0016042	lipid catabolic process	263	70	42.46	0.0005	3.30103	0.26616		56	GO:0042548	regulation of photosynthesis, light reac...	30	20	4.21	9.7e-05	4.01323	0.666667
58	GO:0033356	UDP-L-arabinose metabolic process	11	7	1.78	0.00051	3.29243	0.636364		57	GO:0006353	DNA-templated transcription termination	51	18	7.16	0.00012	3.92082	0.352941
57	GO:0061615	glycolytic process through fructose-6-ph...	11	7	1.78	0.00051	3.29243	0.636364		60	GO:0042549	photosystem II stabilization	8	6	1.12	0.00017	3.76955	0.75
59	GO:0051923	sulfation	17	9	2.74	0.00052	3.284	0.529412		59	GO:0010258	NADH dehydrogenase complex (plastoquinon...	8	6	1.12	0.00017	3.76955	0.75
62	GO:0033320	UDP-D-xylose biosynthetic process	6	5	0.97	0.00057	3.24413	0.833333		58	GO:0010304	PSII associated light-harvesting complex...	8	6	1.12	0.00017	3.76955	0.75
61	GO:2000143	negative regulation of DNA-templated tra...	6	5	0.97	0.00057	3.24413	0.833333		61	GO:0009853	photorespiration	57	21	8	0.00029	3.5376	0.368421
60	GO:0007043	cell-cell junction assembly	6	5	0.97	0.00057	3.24413	0.833333		62	GO:0034599	cellular response to oxidative stress	80	28	11.23	0.00032	3.49485	0.35
63	GO:0009063	amino acid catabolic process	98	29	15.82	0.0006	3.22185	0.295918		63	GO:0009902	chloroplast relocation	16	13	2.25	0.00038	3.42022	0.8125
64	GO:0010038	response to metal ion	218	54	35.19	0.00066	3.18046	0.247706		68	GO:0045038	protein import into chloroplast thylakoi...	4	4	0.56	0.00039	3.40894	1
65	GO:0072330	monocarboxylic acid biosynthetic process	264	71	42.62	0.00077	3.11351	0.268939		67	GO:0043617	cellular response to sucrose starvation	4	4	0.56	0.00039	3.40894	1
66	GO:0051156	glucose 6-phosphate metabolic process	32	13	5.17	0.00082	3.08619	0.40625		66	GO:1900871	chloroplast mRNA modification	4	4	0.56	0.00039	3.40894	1
67	GO:0009251	glucan catabolic process	56	19	9.04	0.00085	3.07058	0.339286		65	GO:0009769	photosynthesis, light harvesting in phot....	4	4	0.56	0.00039	3.40894	1
68	GO:2000280	regulation of root development	82	25	13.24	0.00087	3.06048	0.304878		64	GO:0016560	protein import into peroxisome matrix, d...	4	4	0.56	0.00039	3.40894	1
70	GO:0010214	seed coat development	52	18	8.39	0.00088	3.05552	0.346154		69	GO:0030488	tRNA methylation	34	13	4.77	0.00041	3.38722	0.382353
69	GO:0009832	plant-type cell wall biogenesis	176	59	28.41	0.00088	3.05552	0.335227		74	GO:0006000	fructose metabolic process	12	7	1.68	0.00044	3.35655	0.583333
71	GO:0034219	carbohydrate transmembrane transport	69	22	11.14	0.00089	3.05061	0.318841		73	GO:0035434	copper ion transmembrane transport	12	7	1.68	0.00044	3.35655	0.583333
73	GO:0080147	root hair cell development	99	45	15.98	0.00101	2.99568	0.454545		72	GO:0030388	fructose 1,6-bisphosphate metabolic proc...	12	7	1.68	0.00044	3.35655	0.583333
72	GO:0080112	seed growth	15	8	2.42	0.00101	2.99568	0.533333		71	GO:1900865	chloroplast RNA modification	16	11	2.25	0.00044	3.35655	0.6875
75	GO:0019320	hexose catabolic process	12	7	1.94	0.00106	2.97469	0.583333		70	GO:0043489	RNA stabilization	9	6	1.26	0.00044	3.35655	0.666667
74	GO:0072334	UDP-galactose transmembrane transport	12	7	1.94	0.00106	2.97469	0.583333		75	GO:0010109	regulation of photosynthesis	49	29	6.88	0.00049	3.3098	0.591837
76	GO:0030198	extracellular matrix organization	22	10	3.55	0.00117	2.93181	0.454545		76	GO:0009638	phototropism	23	10	3.23	0.00058	3.23657	0.434783
78	GO:0042445	hormone metabolic process	154	40	24.86	0.00119	2.92445	0.25974		77	GO:0050821	protein stabilization	31	12	4.35	0.0006	3.22185	0.387097
77	GO:0010411	xyloglucan metabolic process	60	27	9.69	0.00119	2.92445	0.45		79	GO:0019430	removal of superoxide radicals	16	8	2.25	0.00067	3.17393	0.5
79	GO:0045492	xylan biosynthetic process	37	14	5.97	0.0012	2.92082	0.378378		78	GO:0006474	N-terminal protein amino acid acetylatio...	16	8	2.25	0.00067	3.17393	0.5
80	GO:0009625	response to insect	41	15	6.62	0.00122	2.91364	0.365854		81	GO:0009097	isoleucine biosynthetic process	13	7	1.83	0.00084	3.07572	0.538462
81	GO:1902600	proton transmembrane transport	145	38	23.41	0.00131	2.88273	0.262069		80	GO:0044070	regulation of monoatomic anion transport	13	7	1.83	0.00084	3.07572	0.538462
82	GO:0010119	regulation of stomatal movement	106	34	17.11	0.00136	2.86646	0.320755		82	GO:0010143	cutin biosynthetic process	24	10	3.37	0.00087	3.06048	0.416667
84	GO:0019432	triglyceride biosynthetic process	26	11	4.2	0.00138	2.86012	0.423077		87	GO:0009657	plastid organization	280	184	39.31	0.00089	3.05061	0.657143
83	GO:0006012	galactose metabolic process	26	11	4.2	0.00138	2.86012	0.423077		86	GO:0009052	pentose-phosphate shunt, non-oxidative b...	7	5	0.98	0.00089	3.05061	0.714286
85	GO:0010015	root morphogenesis	332	107	53.6	0.00146	2.83565	0.322289		85	GO:1903428	positive regulation of reactive oxygen s...	7	5	0.98	0.00089	3.05061	0.714286
86	GO:0005975	carbohydrate metabolic process	1123	327	181.3	0.00152	2.81816	0.291184		84	GO:0006552	leucine catabolic process	7	5	0.98	0.00089	3.05061	0.714286
88	GO:0006066	alcohol metabolic process	182	53	29.38	0.00166	2.77989	0.291209		83	GO:0010236	plastoquinone biosynthetic process	7	5	0.98	0.00089	3.05061	0.714286
87	GO:0010029	regulation of seed germination	90	26	14.53	0.00166	2.77989	0.288889		88	GO:0003002	regionalization	174	40	24.43	0.00097	3.01323	0.229885
89	GO:0042759	long-chain fatty acid biosynthetic proce...	34	15	5.49	0.00171	2.767	0.441176		89	GO:0048481	plant ovule development	55	17	7.72	0.00103	2.98716	0.309091
91	GO:0019336	phenol-containing compound catabolic pro...	7	5	1.13	0.00172	2.76447	0.714286		90	GO:0000002	mitochondrial genome maintenance	14	7	1.97	0.00148	2.82974	0.5
90	GO:0006564	L-serine biosynthetic process	7	5	1.13	0.00172	2.76447	0.714286		91	GO:0000302	response to reactive oxygen species	161	42	22.61	0.00152	2.81816	0.26087
92	GO:0015800	acidic amino acid transport	16	8	2.58	0.00173	2.76195	0.5		92	GO:0019750	chloroplast localization	21	17	2.95	0.0017	2.76955	0.809524
93	GO:0009826	unidimensional cell growth	306	75	49.4	0.00189	2.72354	0.245098		96	GO:0019464	glycine decarboxylation via glycine clea...	5	4	0.7	0.00172	2.76447	0.8
94	GO:0045337	farnesyl diphosphate biosynthetic proces...	13	7	2.1	0.00197	2.70553	0.538462		95	GO:0051083	'de novo' cotranslational protein foldin...	5	4	0.7	0.00172	2.76447	0.8
95	GO:0006071	glycerol metabolic process	27	11	4.36	0.00199	2.70115	0.407407		94	GO:0019877	diaminopimelate biosynthetic process	5	4	0.7	0.00172	2.76447	0.8
97	GO:0019375	galactolipid biosynthetic process	10	6	1.61	0.00205	2.68825	0.6		93	GO:0042794	plastid rRNA transcription	5	4	0.7	0.00172	2.76447	0.8
96	GO:0042732	D-xylose metabolic process	10	6	1.61	0.00205	2.68825	0.6		97	GO:0042335	cuticle development	22	11	3.09	0.00175	2.75696	0.5
98	GO:0010466	negative regulation of peptidase activit...	31	12	5	0.00212	2.67366	0.387097		98	GO:2000142	regulation of DNA-templated transcriptio...	18	8	2.53	0.00176	2.75449	0.444444
99	GO:0040008	regulation of growth	255	59	41.17	0.00223	2.6517	0.231373		100	GO:0006094	gluconeogenesis	26	10	3.65	0.00181	2.74232	0.384615
100	GO:0006032	chitin catabolic process	24	10	3.87	0.00261	2.58336	0.416667		99	GO:0001732	formation of cytoplasmic translation ini...	26	10	3.65	0.00181	2.74232	0.384615

## Sheet: Supplemantary Table 5
Differentially expressed genes in HPi+Phi treatment relative to HPi.
gene ID	logFC	unshrunk.logFC	logCPM	PValue
AT1G01250	1.31951	1.3229	2.16174	0.00218905
AT1G01470	0.768214	0.768336	6.08145	5.05137e-05
AT1G01500	1.11282	1.11368	2.89393	1.01822e-05
AT1G01590	2.29846	2.39886	-0.802051	0.00164631
AT1G01630	0.707956	0.708037	5.71896	0.000191752
AT1G02090	0.487959	0.488037	5.20949	0.0040011
AT1G02205	1.31243	1.31286	4.13896	3.89791e-06
AT1G02270	0.673946	0.674179	3.96635	0.000334708
AT1G02370	0.699984	0.700407	3.35922	0.0025006
AT1G02450	5.18404	1.44269e+08	-1.18074	0.00841492
AT1G02460	0.909934	0.912323	1.33076	0.00293833
AT1G02740	0.64849	0.648932	3.17767	0.00203784
AT1G02800	1.41708	1.42137	0.831369	0.00120069
AT1G02820	0.90352	0.903688	4.46945	0.000452825
AT1G03055	0.641518	0.641995	2.67633	0.00631362
AT1G03110	0.891742	0.891993	4.28329	0.000195139
AT1G03270	0.852128	0.853163	2.26967	0.00435659
AT1G03310	0.821786	0.821919	5.1599	9.14495e-07
AT1G03360	0.758143	0.758472	3.65516	0.00312244
AT1G03495	1.32546	1.32674	2.88468	0.00216641
AT1G03790	2.31833	2.35271	0.309606	0.000256584
AT1G03820	1.10993	1.11079	2.94513	0.000179012
AT1G03940	1.54272	1.54342	4.07662	0.00238941
AT1G04010	0.536169	0.53644	3.74033	0.00651067
AT1G04130	0.664004	0.664328	3.48002	0.0011909
AT1G04220	0.770065	0.770203	5.20563	0.00402146
AT1G04330	0.957839	0.960616	1.82319	0.00261689
AT1G04490	1.40599	1.41475	0.60867	0.00303314
AT1G04680	0.653961	0.654018	5.93349	6.66744e-05
AT1G04710	0.532008	0.532158	4.2814	0.00570251
AT1G04870	0.657116	0.657201	5.51304	0.000815363
AT1G05200	0.472441	0.472516	5.20456	0.00653971
AT1G05460	0.612223	0.612545	3.39586	0.00196286
AT1G06000	1.371	1.37106	7.42386	0.00490801
AT1G06160	2.41516	2.4297	1.03849	0.000164423
AT1G06210	0.579493	0.579612	4.88113	0.000376935
AT1G06500	0.579892	0.580378	2.84975	0.00537507
AT1G06540	2.67591	2.6826	2.25385	0.0016771
AT1G06550	1.34892	1.34903	6.36807	6.14271e-06
AT1G06720	0.755923	0.756004	5.6646	0.00233403
AT1G07280	0.679994	0.680124	4.95225	0.00109931
AT1G07370	0.708257	0.708464	4.28124	0.000665472
AT1G07400	2.38053	2.38336	2.29488	3.13962e-07
AT1G07430	5.17286	5.29442	0.605824	2.24549e-07
AT1G07590	0.99668	0.996686	10.0015	4.173e-05
AT1G07610	0.869651	0.869706	6.32677	0.000126536
AT1G07900	2.83117	2.85457	0.774508	2.51347e-05
AT1G08130	0.85244	0.852569	5.23147	6.01228e-06
AT1G08410	0.610695	0.610824	4.68564	0.000658545
AT1G08430	1.2702	1.27045	5.20495	2.99108e-06
AT1G08440	6.80333	1.44269e+08	-0.930779	0.000246568
AT1G08580	0.88304	0.88319	4.95545	2.09093e-05
AT1G08650	0.542952	0.543027	7.51029	0.00380283
AT1G08845	0.620325	0.620988	2.3485	0.009422
AT1G09180	1.46143	1.47039	0.811381	0.00633977
AT1G09310	1.32803	1.32805	8.62782	2.81986e-07
AT1G09350	2.89672	2.91808	2.11919	8.07776e-05
AT1G09490	0.673545	0.67372	4.45538	4.35657e-05
AT1G09500	1.56559	1.56835	2.78691	2.65501e-05
AT1G09530	0.608243	0.608466	4.84627	0.00061323
AT1G09830	0.438367	0.438428	5.19073	0.00635254
AT1G10230	0.689785	0.69029	2.93056	0.00326291
AT1G10310	0.645039	0.645292	3.82084	0.00056842
AT1G10370	1.67569	1.67577	6.80865	0.00057885
AT1G10490	0.768196	0.768308	5.26144	0.00120646
AT1G10520	1.04016	1.04257	1.53601	0.000961175
AT1G10640	0.992534	0.99291	3.4709	3.86814e-05
AT1G10657	1.68872	1.6898	3.2099	3.1001e-07
AT1G10900	0.942374	0.942455	5.97606	3.65761e-06
AT1G10960	0.647049	0.647055	8.85903	0.00749792
AT1G11090	0.619819	0.620119	3.58016	0.000595361
AT1G11190	0.954475	0.955406	3.26831	0.000136564
AT1G11240	0.636129	0.636282	4.60459	0.000333061
AT1G11410	0.867486	0.867701	4.46329	6.66938e-06
AT1G11420	0.670851	0.671564	2.6962	0.00681292
AT1G11475	0.925272	0.925553	4.19216	2.20845e-05
AT1G11700	0.655949	0.656114	4.62176	0.00297605
AT1G11790	0.792023	0.792166	4.82985	0.000481817
AT1G11840	0.709208	0.709223	8.3001	2.19211e-05
AT1G11850	1.26996	1.27039	3.8289	0.00038097
AT1G12000	0.515902	0.515921	7.43809	0.00743365
AT1G12030	2.57777	2.58809	1.80587	1.12677e-05
AT1G12050	1.12504	1.12523	5.32156	1.18471e-08
AT1G12110	0.526665	0.526673	8.22998	0.00398808
AT1G12140	0.633684	0.633768	5.50178	3.68311e-05
AT1G12200	0.795388	0.795556	5.86637	2.28275e-05
AT1G12845	1.48753	1.49121	1.7465	0.000226275
AT1G12940	2.19782	2.23443	-1.13104	0.00172468
AT1G12950	0.861843	0.862638	4.02017	0.000289762
AT1G13030	1.0021	1.00264	3.41697	1.38031e-05
AT1G13090	1.2653	1.26555	5.06684	4.29652e-07
AT1G13245	0.642769	0.642863	5.21563	0.0074663
AT1G13250	1.03213	1.03264	3.54933	1.15025e-05
AT1G13260	1.2658	1.26619	4.10242	1.82647e-08
AT1G13470	2.56914	2.62982	-0.97505	0.00840513
AT1G13609	2.24874	2.2499	3.1269	6.51216e-06
AT1G13650	1.12316	1.12347	3.97416	0.000247014
AT1G13860	0.551061	0.55125	4.10532	0.00184445
AT1G13930	0.816784	0.816806	7.95316	0.000123094
AT1G14060	0.992696	0.992993	4.40008	4.69962e-06
AT1G14360	0.662321	0.662519	4.64148	0.000870941
AT1G14520	0.783493	0.785703	2.0976	0.00968747
AT1G14630	1.37021	1.37277	1.54015	0.000481056
AT1G14840	0.651507	0.651609	4.81777	4.501e-05
AT1G14880	7.20205	7.64484	1.61234	5.03323e-05
AT1G14980	1.10728	1.10735	6.59858	3.17793e-06
AT1G15085	1.7626	1.7737	0.380303	0.000764688
AT1G15230	0.595709	0.595885	4.55441	0.000769689
AT1G15250	0.711827	0.712034	4.0923	0.00149118
AT1G15270	0.729136	0.729184	6.47709	7.03928e-05
AT1G15410	0.963092	0.96327	4.87732	1.21757e-06
AT1G15470	0.542899	0.543083	4.15005	0.00498917
AT1G15520	1.50109	1.50256	3.75121	0.0006714
AT1G15550	1.08199	1.08251	3.45232	1.80343e-05
AT1G15580	1.85383	1.86946	-0.498436	0.0020877
AT1G15825	1.06475	1.0669	1.19392	0.00117565
AT1G15830	0.927327	0.927797	3.07832	0.000202228
AT1G15940	0.650124	0.650244	4.88499	0.000625975
AT1G16350	0.730388	0.730443	6.28762	5.09154e-05
AT1G16410	2.01151	2.01173	6.07263	1.69244e-08
AT1G16430	0.752543	0.753754	2.01951	0.00324533
AT1G16730	0.978192	0.978435	4.37912	0.000888629
AT1G16850	1.30381	1.30964	1.2695	0.00579115
AT1G17020	2.09006	2.0918	3.3631	7.50569e-08
AT1G17030	1.21412	1.21867	1.13562	0.00215979
AT1G17285	1.16523	1.16879	1.62843	0.00424034
AT1G17550	0.714617	0.714717	5.63196	4.24842e-05
AT1G17560	0.688582	0.6892	2.84898	0.00370119
AT1G17710	1.12406	1.12982	8.57314	0.00688437
AT1G17745	0.916916	0.916991	7.3293	2.05513e-06
AT1G17760	0.459863	0.459965	4.88357	0.00767842
AT1G17870	1.62275	1.62375	3.01633	3.37094e-06
AT1G18000	0.617995	0.618124	4.50653	0.000319478
AT1G18100	2.32949	2.33514	1.72159	1.51528e-05
AT1G18150	0.589538	0.589615	5.79643	0.000477676
AT1G18360	1.20211	1.20267	3.70568	6.78709e-08
AT1G18590	0.807254	0.80739	5.48879	4.36118e-05
AT1G18630	0.607626	0.608013	3.255	0.00532528
AT1G18670	0.565019	0.56523	4.00148	0.0021376
AT1G18800	0.804782	0.804908	5.17712	3.32341e-05
AT1G18870	2.69425	2.69637	3.98106	9.34975e-07
AT1G19330	1.23175	1.23252	3.40453	1.91627e-05
AT1G19340	0.785619	0.786719	2.0356	0.00107116
AT1G19450	0.883894	0.883927	6.98503	5.55903e-06
AT1G19570	0.893043	0.893072	7.76006	3.9115e-06
AT1G19630	1.95923	1.96771	1.43282	7.03222e-05
AT1G19640	2.134	2.13853	1.75917	2.94194e-05
AT1G19670	1.17403	1.17428	5.44093	4.10226e-05
AT1G19800	0.580826	0.580926	4.86813	0.000199128
AT1G19940	1.02613	1.02912	1.22424	0.00816712
AT1G19960	2.4914	2.49656	2.62593	1.26623e-06
AT1G20070	0.725598	0.725901	4.00855	0.000192346
AT1G20220	0.944127	0.944198	6.22387	7.4846e-06
AT1G20450	0.988446	0.988499	6.72335	7.88595e-05
AT1G20510	0.556002	0.556161	4.80998	0.00268629
AT1G20640	0.562467	0.562586	4.84602	0.000555735
AT1G20650	1.00016	1.00036	4.73986	1.66727e-05
AT1G20670	0.4933	0.493466	4.09757	0.00577076
AT1G20950	0.974722	0.974771	6.9344	4.66105e-05
AT1G20990	1.40091	1.41558	-0.642513	0.00515405
AT1G21190	0.491661	0.491791	4.51062	0.0066097
AT1G21250	3.19612	3.19747	5.04585	1.04834e-07
AT1G21270	1.92473	1.92541	4.19058	2.09891e-06
AT1G21440	0.584457	0.584514	6.31342	7.11755e-05
AT1G21590	0.813412	0.813505	5.5861	1.99008e-06
AT1G21890	4.90285	5.00036	0.113525	5.26459e-07
AT1G22065	0.63492	0.635381	3.50658	0.00604181
AT1G22070	0.948683	0.949053	5.02716	1.97691e-06
AT1G22150	2.97219	3.01701	4.37056	3.1983e-06
AT1G22160	3.31242	3.31485	3.67931	1.53004e-10
AT1G22370	1.27505	1.27849	1.79003	0.000595308
AT1G22410	1.0723	1.07233	8.59763	4.3249e-06
AT1G22490	2.46909	2.51122	-0.814801	0.000426143
AT1G22950	0.667063	0.667304	3.94279	0.000145998
AT1G23020	0.764902	0.764984	5.40566	2.71641e-06
AT1G23100	0.965933	0.966998	2.65329	0.000401951
AT1G23130	0.711402	0.711411	8.81163	0.00152387
AT1G23200	1.42512	1.42916	2.00459	0.000347729
AT1G23205	0.526919	0.527027	4.33258	0.0034417
AT1G23280	0.648446	0.64854	5.2464	0.000877783
AT1G23390	0.732819	0.732894	5.62744	0.000879938
AT1G23730	2.14211	2.14343	3.31844	1.85699e-06
AT1G24020	1.41433	1.41447	5.75922	6.69466e-06
AT1G24100	0.646972	0.647028	6.26533	0.000283327
AT1G24120	0.474978	0.475101	4.39317	0.00588955
AT1G24145	1.81482	1.82092	1.37101	0.000387838
AT1G24147	1.52975	1.53293	1.51172	0.000295262
AT1G24148	1.10084	1.10156	3.25162	0.00044714
AT1G24260	1.44445	1.44636	1.57811	0.000161134
AT1G24280	0.688257	0.6884	4.70269	0.000148721
AT1G24310	0.643835	0.644015	4.32248	0.000596417
AT1G24490	0.574969	0.575065	5.07779	0.000195586
AT1G24575	1.85961	1.86185	3.95198	5.45043e-07
AT1G24625	0.779635	0.780091	3.47187	6.59874e-05
AT1G24881	2.83434	2.83579	3.84633	0.006112
AT1G25220	0.63683	0.636964	5.15318	0.000301769
AT1G25350	0.560943	0.560976	6.55283	0.00160766
AT1G25425	1.92043	1.9278	1.13083	0.000147343
AT1G25440	1.84379	1.84392	6.20982	7.36865e-09
AT1G25530	0.912115	0.912471	4.37264	4.88825e-05
AT1G25560	0.918508	0.918641	5.29002	7.0003e-06
AT1G26100	0.739816	0.74053	2.65207	0.000829127
AT1G26130	0.629937	0.630351	3.40545	0.00643927
AT1G26150	0.784184	0.784285	5.64316	0.000647399
AT1G26340	0.502068	0.502276	3.8677	0.00878571
AT1G26450	0.807948	0.808472	3.35738	0.00143523
AT1G26470	0.573679	0.573856	4.24331	0.00336061
AT1G26540	1.17138	1.17295	1.81607	2.26105e-05
AT1G26730	1.10664	1.10907	1.62599	0.00129923
AT1G26762	2.72378	2.83046	-0.401264	0.00105063
AT1G26910	0.73741	0.73767	4.05706	0.0007022
AT1G27030	0.506046	0.506115	5.97436	0.000786635
AT1G27330	0.589742	0.589828	5.47226	0.00109841
AT1G28060	0.536696	0.53678	5.14474	0.000736214
AT1G28230	1.85833	1.8671	1.72883	7.26082e-06
AT1G28395	0.635345	0.635571	3.94775	0.00171606
AT1G28570	0.624434	0.624813	3.6281	0.00385425
AT1G28610	1.84944	1.8503	3.8839	1.39389e-05
AT1G28680	0.674965	0.675025	6.14661	0.00028773
AT1G29030	0.89388	0.894312	3.7683	4.17622e-05
AT1G29050	0.441969	0.442049	5.00351	0.00657873
AT1G29170	0.556402	0.556507	4.77194	0.00181288
AT1G29270	1.10594	1.10927	1.41831	0.00022993
AT1G29390	0.887726	0.888097	3.74067	3.91377e-06
AT1G29395	2.09643	2.0999	2.01189	3.48458e-06
AT1G29400	0.412725	0.412753	6.86679	0.00943755
AT1G29860	2.20031	2.22727	-0.21649	0.00270323
AT1G29940	0.889435	0.889521	5.87413	0.000184613
AT1G29965	0.746085	0.746284	4.27249	0.00206897
AT1G30070	1.35685	1.35729	4.19207	3.43126e-08
AT1G30220	1.64176	1.65083	0.504234	0.00447518
AT1G30480	0.529619	0.529832	3.77964	0.00236234
AT1G30500	1.15648	1.15746	4.28623	5.33084e-06
AT1G30510	1.02917	1.02924	6.63855	4.54694e-07
AT1G30515	1.40093	1.41073	0.153182	0.00719098
AT1G30530	1.07459	1.07465	6.94379	0.000500629
AT1G30760	0.915382	0.916457	2.52404	0.00125263
AT1G30960	1.0963	1.09722	2.74754	0.000195098
AT1G31010	0.983128	0.984078	2.58087	0.00026332
AT1G31320	1.1613	1.16233	2.73341	1.75135e-06
AT1G31550	2.61995	2.62666	2.02302	1.63183e-08
AT1G31580	2.23486	2.23499	7.76383	8.04735e-08
AT1G31660	0.720772	0.720868	5.33654	0.00062288
AT1G31690	2.04164	2.04811	0.879018	7.09303e-05
AT1G31760	1.26827	1.27085	1.69053	0.000773901
AT1G31820	1.1155	1.11647	2.8406	2.99282e-05
AT1G31860	0.895947	0.896099	4.76205	8.94352e-05
AT1G31970	0.508044	0.508068	6.77578	0.0037986
AT1G32440	0.587916	0.587953	6.35042	0.000970267
AT1G32580	0.519032	0.519105	5.37644	0.00264798
AT1G32900	0.683852	0.68386	9.03173	0.00320078
AT1G32928	0.743066	0.743937	1.99594	0.0079206
AT1G33100	1.34349	1.35923	0.144028	0.00458193
AT1G33170	0.555834	0.555943	4.75938	0.00432441
AT1G33270	0.472056	0.472199	4.42251	0.00657725
AT1G33970	0.875733	0.876226	3.64556	7.18751e-05
AT1G33990	0.422419	0.422458	5.953	0.0076145
AT1G34060	4.25587	4.26219	3.33706	3.6899e-12
AT1G34065	0.641533	0.642289	2.52133	0.00673737
AT1G34245	0.834793	0.836571	1.57611	0.00570658
AT1G34340	0.990739	0.991308	3.87277	5.32658e-06
AT1G34570	1.22927	1.22982	3.69838	3.52098e-07
AT1G34640	0.976951	0.978294	3.16694	0.000301567
AT1G34780	0.61396	0.614206	3.96057	0.00250984
AT1G35250	0.761905	0.762532	2.91636	0.00417731
AT1G35260	0.832539	0.832998	3.50457	0.000254382
AT1G35310	1.47592	1.4798	1.76044	0.000218832
AT1G35320	0.737111	0.737306	4.70282	0.000698786
AT1G35530	1.03952	1.04111	2.08383	0.00451093
AT1G35910	1.72864	1.73308	2.27382	0.000106502
AT1G36280	0.789108	0.789361	4.14232	1.5214e-05
AT1G36310	0.5606	0.560689	5.00371	0.00075998
AT1G36370	0.62567	0.625711	7.09422	0.00169588
AT1G41880	0.515622	0.515642	6.99826	0.00599624
AT1G42440	0.475123	0.475164	5.97408	0.00897561
AT1G43620	0.752886	0.753265	3.77401	0.00132685
AT1G44900	0.529778	0.529885	4.72023	0.00894255
AT1G45010	1.83178	1.83295	3.23399	1.28417e-06
AT1G45191	1.53958	1.54069	2.99289	2.89704e-05
AT1G45201	1.10907	1.10911	7.2438	1.93356e-06
AT1G45231	0.814763	0.815351	3.1868	0.000714034
AT1G45249	0.478037	0.478122	5.68456	0.00547935
AT1G46480	2.09919	2.10383	1.53263	1.02261e-07
AT1G47395	0.991757	0.992585	2.1851	0.00572922
AT1G47400	1.54157	1.54303	2.09857	0.000180145
AT1G47510	1.532	1.53477	2.00929	0.000320199
AT1G47710	0.512569	0.512721	4.71912	0.000941066
AT1G47870	0.511947	0.512235	3.47635	0.00775435
AT1G47900	0.526973	0.527051	5.34125	0.0026983
AT1G48120	1.95372	1.95436	4.16133	1.10002e-07
AT1G48540	0.44663	0.44672	4.86431	0.00388725
AT1G48660	1.49781	1.51242	-0.0326879	0.00524175
AT1G48850	0.86486	0.864897	7.09443	4.1993e-05
AT1G48920	1.17875	1.17877	8.51429	7.19452e-06
AT1G48930	0.666781	0.667053	5.0157	0.00617409
AT1G49130	1.51131	1.51659	0.878782	0.0012559
AT1G49570	2.66363	2.66932	2.54701	3.66623e-06
AT1G49620	1.41466	1.41702	2.03562	8.42241e-05
AT1G49640	1.90487	1.93399	-1.19554	0.00282369
AT1G49750	0.736935	0.737016	5.88949	3.21493e-05
AT1G49860	0.915591	0.916075	3.42091	0.00185284
AT1G50110	0.888905	0.889503	4.13384	0.000140805
AT1G50840	0.88027	0.880344	5.92789	2.29964e-07
AT1G50910	0.752779	0.753895	2.08399	0.00779206
AT1G51140	1.94721	1.94768	4.80123	1.21208e-09
AT1G51170	1.07546	1.07609	3.47783	3.62372e-05
AT1G51340	0.895266	0.89555	4.14108	1.3265e-05
AT1G51402	1.40103	1.41057	0.0531144	0.00792526
AT1G51440	1.22864	1.22992	2.27846	0.000246637
AT1G51500	0.758172	0.758209	6.82351	1.0632e-05
AT1G51610	0.667328	0.667657	4.08541	0.000136065
AT1G51680	1.06956	1.06959	7.95392	1.83141e-07
AT1G51805	0.590869	0.590914	6.25502	0.00307051
AT1G52030	2.42811	2.45442	0.161232	4.25079e-05
AT1G52040	1.6079	1.62132	0.439501	0.00336783
AT1G52240	0.637218	0.638351	1.96831	0.00697284
AT1G52280	0.46899	0.469113	4.4684	0.00874227
AT1G52400	0.888947	0.889079	5.69839	0.00262438
AT1G52410	1.0723	1.07282	3.74551	0.000128616
AT1G52560	1.51206	1.52412	-0.380715	0.00797721
AT1G52690	5.86441	5.89427	2.56059	4.41851e-07
AT1G52700	1	1.00378	1.14887	0.00350177
AT1G52760	0.529942	0.529973	6.71088	0.000350734
AT1G52827	1.60903	1.61143	1.88879	3.94034e-05
AT1G52855	1.89428	1.90455	0.671712	8.7027e-05
AT1G52880	1.00322	1.00386	3.26383	6.95397e-05
AT1G52890	6.04123	6.12443	2.66525	1.61581e-07
AT1G52930	0.731212	0.731322	5.37696	0.000561518
AT1G53070	0.650018	0.650496	3.3387	0.0011869
AT1G53130	1.6005	1.6121	0.75343	0.00098225
AT1G53310	0.472639	0.472653	8.76736	0.00794859
AT1G53540	3.21718	3.24598	-0.109003	1.22754e-05
AT1G53541	2.65432	2.68532	-0.645237	0.00113098
AT1G53542	1.5375	1.54117	1.14569	0.00041978
AT1G54040	2.88277	2.89159	1.43774	2.85099e-07
AT1G54050	0.780378	0.781055	2.43134	0.000972464
AT1G54130	0.78492	0.784989	6.04309	5.77366e-07
AT1G54140	0.594105	0.59451	3.07393	0.00181641
AT1G54160	1.43264	1.43537	1.98177	5.08871e-05
AT1G54570	0.845972	0.846211	4.7859	0.000426198
AT1G54575	1.9392	1.9401	4.47037	1.23746e-09
AT1G54820	0.756574	0.756917	3.45152	0.000426568
AT1G55020	0.653246	0.653283	7.05447	0.00633617
AT1G55040	0.813679	0.814349	2.94523	0.000882591
AT1G55210	0.818578	0.818658	6.24618	8.83275e-06
AT1G55260	1.04324	1.04344	4.94643	5.68845e-06
AT1G55265	0.600239	0.600614	3.12331	0.000865351
AT1G55320	0.87577	0.875943	5.13393	0.00470863
AT1G55500	0.590691	0.59079	5.50431	0.000461942
AT1G55680	0.696027	0.696072	6.50268	3.84087e-06
AT1G55760	0.575659	0.576085	3.10028	0.00415727
AT1G55900	0.643377	0.643532	4.67991	9.55286e-05
AT1G56045	1.36322	1.36337	5.52579	1.57974e-08
AT1G56110	0.987737	0.987771	7.38326	2.59685e-05
AT1G56170	1.84705	1.85006	2.20593	5.87117e-07
AT1G56580	0.767021	0.767061	6.85282	4.48808e-05
AT1G56600	3.04766	3.05317	5.53773	2.71774e-08
AT1G56650	3.24567	3.25214	3.93144	5.68083e-08
AT1G56670	0.948769	0.949572	2.56876	0.00291805
AT1G56710	2.95829	2.97388	1.28914	9.76723e-07
AT1G57820	0.552715	0.552835	4.85	0.00825747
AT1G58225	3.05548	3.20091	-0.138565	0.00611286
AT1G58280	0.831788	0.832073	5.98302	1.62155e-05
AT1G58360	0.544827	0.544869	6.20911	0.000659484
AT1G58440	0.420174	0.420224	5.45543	0.00739075
AT1G58520	0.811693	0.811744	6.29095	2.29767e-05
AT1G59510	0.850868	0.852943	1.52322	0.00697047
AT1G59640	1.2466	1.24873	2.22614	2.52288e-05
AT1G59730	1.11814	1.12175	1.33651	0.00206898
AT1G60110	1.1242	1.12787	0.750771	0.00584811
AT1G60190	1.98155	1.98316	3.70077	0.000129949
AT1G60590	0.713089	0.713219	4.65023	0.00193163
AT1G60640	0.720704	0.720847	4.61402	0.000837675
AT1G60790	0.485016	0.485214	3.72455	0.00932227
AT1G60850	0.544559	0.544738	4.16138	0.005699
AT1G60890	0.499907	0.500076	4.22266	0.00188806
AT1G61255	1.45235	1.45967	0.684307	0.00287542
AT1G61570	1.01466	1.01488	4.76137	1.63234e-05
AT1G61610	1.74288	1.75427	-0.108917	0.00152538
AT1G61795	0.873684	0.874638	2.56615	0.00133765
AT1G61800	3.5094	3.51244	5.78079	1.1395e-06
AT1G62130	0.643317	0.643791	3.29316	0.00273643
AT1G62360	0.725133	0.725982	2.05032	0.00960849
AT1G62420	1.59788	1.6068	0.344666	0.00125178
AT1G62430	0.791952	0.792212	4.46746	1.1098e-05
AT1G62540	2.38413	2.38648	4.31666	6.34698e-10
AT1G62560	1.24392	1.24415	5.25478	3.11065e-07
AT1G62710	0.979324	0.980125	4.13363	0.000646446
AT1G62740	0.778166	0.778233	6.00522	6.06389e-06
AT1G63000	0.471784	0.471807	7.0535	0.00780015
AT1G63050	0.600238	0.600433	4.1672	0.000783173
AT1G63250	0.867693	0.868425	2.866	0.00163806
AT1G63660	0.564341	0.564396	5.87756	0.00476046
AT1G63810	1.05618	1.05636	5.05163	0.000104175
AT1G63820	1.32767	1.33326	1.25474	0.000815726
AT1G64050	0.639662	0.63978	4.90026	0.000991298
AT1G64110	1.57586	1.58119	2.38474	5.03053e-05
AT1G64220	1.00664	1.00968	1.31584	0.00426977
AT1G64360	2.23394	2.23831	1.58254	0.000470314
AT1G64370	0.602359	0.602387	6.93248	0.00225244
AT1G64390	0.759135	0.759172	6.89865	9.89136e-05
AT1G64400	1.73127	1.73167	4.95449	5.21297e-09
AT1G64600	0.895159	0.895717	3.26976	0.00324437
AT1G64660	1.11619	1.11643	5.1896	9.2813e-08
AT1G64710	1.01555	1.01583	4.87201	3.69872e-05
AT1G64850	0.670308	0.670405	5.20853	0.00013132
AT1G64880	0.740827	0.740895	6.02685	0.000572386
AT1G64900	1.13428	1.1344	5.96949	9.0201e-07
AT1G64970	2.40749	2.40823	4.76884	6.58128e-09
AT1G64980	0.80329	0.803394	5.26216	4.24422e-05
AT1G65060	1.52122	1.52137	6.30029	0.00346085
AT1G65080	0.802698	0.803514	2.53977	0.00185866
AT1G65480	2.10945	2.13283	-0.988677	0.000722905
AT1G65560	0.646571	0.646916	3.4769	0.00890156
AT1G65670	2.54363	2.61395	-1.67844	0.00257609
AT1G65800	1.04141	1.04175	4.19311	0.000103612
AT1G65840	0.477648	0.477669	8.0376	0.00664015
AT1G65860	0.85195	0.852221	4.43182	0.00130012
AT1G65890	3.39157	3.42743	0.352504	0.000689149
AT1G65980	0.52312	0.523135	7.89191	0.00365524
AT1G66390	3.72348	3.74524	2.91057	1.52553e-05
AT1G66920	1.35718	1.35839	2.73834	0.000243015
AT1G66980	0.666931	0.667095	5.00625	0.000197221
AT1G67110	0.966103	0.967895	1.35683	0.00371326
AT1G67300	0.639887	0.640173	4.20585	0.000923919
AT1G67320	0.720191	0.720507	3.7145	0.00188881
AT1G67360	0.689079	0.689156	6.11478	0.000442318
AT1G67630	0.94353	0.943974	3.63105	0.000296564
AT1G67750	1.6085	1.60897	4.32397	2.53722e-07
AT1G67860	1.01766	1.01799	3.80305	0.00154463
AT1G67865	1.41932	1.42002	3.05862	0.000847979
AT1G67900	1.17701	1.17716	5.26492	3.0194e-08
AT1G67920	1.67786	1.68144	3.17855	7.87575e-06
AT1G67950	0.602022	0.602257	3.83222	0.00276973
AT1G68520	1.51732	1.51745	5.77258	1.99072e-07
AT1G68570	0.908443	0.908552	5.74589	3.52955e-05
AT1G68600	1.11485	1.11561	3.19575	4.17458e-05
AT1G68760	0.916451	0.916845	4.02473	7.7994e-06
AT1G68990	0.569531	0.569618	5.13852	0.00884855
AT1G69040	0.774565	0.774781	4.52599	0.00169264
AT1G69070	0.89812	0.898248	5.24001	2.78066e-05
AT1G69160	0.518864	0.51898	4.7492	0.00546364
AT1G69230	1.72255	1.72499	1.90576	5.52079e-06
AT1G69480	1.76575	1.76733	3.30361	6.51581e-07
AT1G69490	2.4665	2.46888	2.94351	6.81672e-07
AT1G69610	0.568556	0.568918	3.28454	0.00298437
AT1G69690	1.23448	1.23506	3.56306	1.88315e-06
AT1G69720	1.89371	1.91095	-0.497804	0.000997965
AT1G69770	0.812409	0.812562	4.97667	0.000885371
AT1G69830	2.48621	2.48699	4.43573	4.00152e-07
AT1G69850	0.449275	0.449332	5.75168	0.00549006
AT1G69880	3.32326	3.32995	2.50253	2.54968e-07
AT1G70260	5.63982	5.68181	1.62585	8.89787e-10
AT1G70335	4.30874	4.35504	0.761825	0.000296887
AT1G70505	0.79321	0.793941	2.53108	0.0010824
AT1G70580	1.1698	1.16988	6.38163	2.26585e-07
AT1G70800	0.988595	0.994456	1.54236	0.00567936
AT1G70820	2.55206	2.55521	2.71521	2.22183e-08
AT1G70900	0.688016	0.688212	5.43783	0.000206494
AT1G71030	1.51519	1.51577	3.62689	1.6333e-05
AT1G71050	1.23976	1.24218	1.54262	0.000690345
AT1G71130	0.570776	0.571224	4.50468	0.00749067
AT1G71140	1.21824	1.21992	2.40193	0.000402052
AT1G71280	1.49605	1.52418	-0.179888	0.00630233
AT1G72030	0.77621	0.776362	4.92406	0.000105849
AT1G72040	0.52359	0.52363	6.12518	0.00127704
AT1G72090	0.620911	0.621004	5.17677	0.000377492
AT1G72440	0.663342	0.663399	5.88725	0.0031875
AT1G72630	0.657132	0.6575	3.55575	0.00265423
AT1G72890	0.563089	0.56372	4.14747	0.00413257
AT1G72930	1.16725	1.16738	5.81074	7.932e-06
AT1G73000	2.40478	2.53943	0.310017	0.0027472
AT1G73010	0.966279	0.967934	8.95917	0.000343992
AT1G73040	2.22831	2.25093	0.646212	0.000454815
AT1G73220	2.04428	2.04848	7.11628	2.33242e-06
AT1G73390	0.697019	0.697108	5.43123	3.39844e-05
AT1G73480	1.23222	1.2326	4.72941	2.6425e-05
AT1G73530	0.779454	0.779687	4.03141	0.000399843
AT1G73540	0.670626	0.670825	3.90634	0.00796121
AT1G73600	2.73061	2.73076	6.68358	4.44992e-12
AT1G73700	3.10514	3.12801	1.05733	1.43994e-06
AT1G73750	1.29392	1.29506	2.83817	5.75433e-06
AT1G73760	0.835483	0.835851	3.58398	8.20786e-05
AT1G73770	0.860334	0.861649	1.82701	0.00535564
AT1G73830	1.89312	1.89407	3.44022	2.58925e-06
AT1G73950	0.511502	0.511684	4.41149	0.00470062
AT1G74010	0.873222	0.874691	3.16667	0.00345453
AT1G74100	0.542974	0.543012	6.58884	0.00138829
AT1G74230	0.478435	0.478476	6.04967	0.00260925
AT1G74240	0.748481	0.749402	2.39688	0.00936019
AT1G74560	0.589463	0.589504	6.35118	0.00105774
AT1G74640	1.07938	1.07958	4.89242	1.35391e-06
AT1G74810	2.06258	2.0645	3.61328	6.00769e-05
AT1G74940	1.01179	1.01245	3.09656	3.47067e-05
AT1G75040	1.14821	1.14903	2.78753	7.09429e-05
AT1G75270	0.621826	0.621886	6.07025	0.000664909
AT1G75280	2.08054	2.08064	7.2212	3.49064e-09
AT1G75290	0.936902	0.938774	2.05197	0.000700282
AT1G75370	1.09287	1.09303	5.36798	4.29876e-08
AT1G75380	0.898192	0.898261	6.33714	0.00107244
AT1G75390	0.763368	0.763606	5.24243	0.000394867
AT1G75680	0.512452	0.512478	6.72307	0.00129299
AT1G75830	2.84794	2.88486	1.10147	0.0021842
AT1G75900	0.931604	0.932525	2.52614	0.000540839
AT1G76020	0.621428	0.621782	3.3793	0.00576666
AT1G76130	0.523962	0.524105	4.27818	0.00614956
AT1G76300	0.689833	0.690039	4.231	0.000631704
AT1G76350	0.651334	0.651496	4.67892	0.000215792
AT1G76470	1.74547	1.75376	1.45974	0.00794863
AT1G76680	0.705396	0.705416	7.6884	0.000981083
AT1G76790	1.29058	1.29078	5.30482	2.50294e-07
AT1G76952	1.23832	1.24349	0.851307	0.00183177
AT1G76955	7.98398	1.44269e+08	-0.403935	8.76811e-07
AT1G76960	8.10916	8.27282	2.19106	2.46244e-08
AT1G77030	0.604931	0.605014	5.35449	0.00936268
AT1G77320	0.609202	0.609562	3.42356	0.00470302
AT1G77520	1.33311	1.33408	3.11601	0.000103594
AT1G77530	1.27754	1.27868	2.6178	1.05767e-05
AT1G77540	1.07479	1.07534	3.51707	1.72942e-05
AT1G77550	0.799285	0.79944	4.97929	0.00087018
AT1G77570	1.11858	1.12181	1.1265	0.00426357
AT1G77600	0.778131	0.77834	4.42735	9.85797e-06
AT1G77610	0.61616	0.61625	5.43844	0.000139648
AT1G77670	0.771838	0.771958	5.40209	1.75871e-06
AT1G77920	1.16893	1.16925	4.98774	1.94747e-07
AT1G77990	0.729123	0.729404	4.03011	0.000170595
AT1G78020	1.31969	1.31978	6.568	2.41333e-05
AT1G78120	0.840442	0.840764	3.70883	0.000111275
AT1G78170	0.599029	0.59941	3.36426	0.00493754
AT1G78210	0.570267	0.570525	3.60996	0.00790272
AT1G78370	1.17469	1.17473	7.48522	1.37611e-07
AT1G78490	0.823738	0.82408	3.65376	0.000653359
AT1G78570	2.02198	2.02201	8.70832	5.02811e-05
AT1G78580	0.747138	0.747202	5.98504	3.33683e-05
AT1G78680	1.05802	1.05813	5.84642	4.66505e-08
AT1G78780	0.720295	0.721352	2.32185	0.00555791
AT1G78930	0.779859	0.780738	2.34172	0.00396686
AT1G79150	0.728393	0.728511	5.04965	0.0018684
AT1G79390	0.574715	0.57493	4.05302	0.00112103
AT1G79470	0.686294	0.68651	4.4524	0.00057544
AT1G79520	0.974888	0.975072	5.17637	2.51189e-05
AT1G79550	0.625277	0.625286	8.90508	0.000297096
AT1G79600	0.560143	0.560163	7.13994	0.00429073
AT1G79610	0.651455	0.651694	4.32654	0.000437507
AT1G79770	1.16355	1.16469	2.55033	4.16306e-05
AT1G79890	0.885453	0.88774	1.46881	0.00948509
AT1G79920	0.962162	0.962188	7.56353	1.2892e-06
AT1G79970	0.502481	0.502557	5.28683	0.00276844
AT1G80110	0.952327	0.954218	2.07352	0.00168466
AT1G80130	1.30926	1.3097	4.64953	1.80829e-05
AT1G80270	0.805604	0.805751	5.07876	0.00115089
AT1G80440	0.774232	0.774469	4.20459	0.00397224
AT1G80710	1.07069	1.07227	1.9117	0.000284915
AT1G80760	0.590939	0.591076	4.46274	0.00393672
AT2G01008	0.851886	0.852926	3.87661	0.00388726
AT2G01610	2.15655	2.16148	1.49884	4.38782e-06
AT2G01640	0.577966	0.578384	3.07569	0.00212804
AT2G01680	0.499568	0.499634	5.49062	0.00129153
AT2G01750	0.670025	0.670367	3.55365	0.00377896
AT2G02060	0.748084	0.748835	2.35757	0.00229476
AT2G02080	0.686092	0.686294	4.12446	0.00807402
AT2G02790	0.499552	0.499687	4.33111	0.0058651
AT2G02990	2.14317	2.14956	4.54942	4.33421e-06
AT2G03090	0.672723	0.672812	5.48038	3.95274e-05
AT2G03140	0.633576	0.633651	5.5755	0.000506564
AT2G03310	3.85417	3.86723	1.93828	9.71608e-11
AT2G03340	0.553612	0.55377	4.52025	0.000942887
AT2G04030	0.936426	0.93644	8.38102	1.9943e-05
AT2G04080	1.51301	1.51601	1.90464	8.95577e-05
AT2G04240	0.784048	0.784496	3.56522	0.00026564
AT2G04350	0.711988	0.712039	6.46039	0.000245662
AT2G04400	0.533199	0.533266	5.80518	0.00127931
AT2G04880	0.605335	0.605439	5.12112	0.000368934
AT2G05120	0.508863	0.509008	4.39013	0.00816957
AT2G05380	0.672115	0.672127	8.35105	0.00511874
AT2G05440	1.86275	1.86279	8.26598	1.1882e-07
AT2G05510	3.04868	3.04945	6.83574	2.31263e-07
AT2G05520	1.03899	1.03903	8.45341	0.000283886
AT2G05590	0.708139	0.70845	4.07317	0.000234059
AT2G07690	0.859332	0.859522	4.62035	0.0012762
AT2G11910	0.764443	0.764499	6.28711	3.88522e-05
AT2G12462	0.669916	0.670289	3.3714	0.00768495
AT2G14070	1.2906	1.30673	-0.613104	0.009201
AT2G14080	1.3479	1.34851	3.77178	7.28575e-06
AT2G14210	1.84861	1.86423	-0.293791	0.000838772
AT2G14247	2.34959	2.35194	2.25668	0.000112014
AT2G14560	6.95894	7.04272	3.78469	1.37962e-07
AT2G14610	8.39773	8.84199	1.26692	2.2403e-05
AT2G14750	1.26603	1.26612	6.71001	7.60022e-09
AT2G14860	1.33381	1.33579	2.39328	1.34464e-05
AT2G15050	1.45029	1.45056	5.25372	2.48947e-07
AT2G15080	0.988509	0.989241	2.65137	0.001914
AT2G15310	0.699542	0.700519	2.19035	0.0022688
AT2G15440	1.25498	1.25689	2.41582	2.83662e-06
AT2G15690	0.828471	0.828616	5.06925	7.43461e-05
AT2G15780	5.28077	1.44269e+08	-1.31762	0.00935481
AT2G15790	0.473656	0.473809	4.23797	0.00361228
AT2G16050	0.632984	0.633956	2.30631	0.00758056
AT2G16385	1.19934	1.20297	1.80478	0.000202886
AT2G16430	0.581523	0.581578	6.45827	0.00255967
AT2G16660	1.78621	1.7867	4.83754	3.76109e-10
AT2G16740	0.64764	0.647789	4.90282	0.000122373
AT2G17040	1.22457	1.22788	1.74809	0.00734343
AT2G17280	0.764203	0.764726	5.33766	0.00176125
AT2G17695	0.61494	0.61509	4.44139	0.00590163
AT2G17700	0.583339	0.58351	4.56396	0.000950146
AT2G18150	3.26425	3.26677	4.00514	7.75128e-11
AT2G18230	1.08872	1.08891	5.18745	1.10394e-07
AT2G18330	0.606399	0.606562	4.48602	0.00733315
AT2G18470	2.44917	2.46331	0.253975	2.33229e-05
AT2G18480	2.5357	2.54957	0.973354	4.45634e-06
AT2G18890	0.744114	0.744684	2.84729	0.000749307
AT2G18900	0.827116	0.827246	5.15697	0.000146786
AT2G18950	0.632982	0.633196	4.2718	0.0015747
AT2G19385	0.605396	0.605648	3.79425	0.00197821
AT2G19540	0.543486	0.543526	6.28329	0.00127505
AT2G19590	0.710446	0.710864	3.35303	0.000199587
AT2G19670	1.26673	1.26723	4.00768	3.61904e-05
AT2G19750	0.627505	0.627561	5.89536	0.000487557
AT2G19810	0.94835	0.94892	4.02742	0.00385349
AT2G19860	0.84874	0.848906	5.19024	6.48499e-05
AT2G19870	0.569134	0.569219	5.10789	0.000229191
AT2G19900	1.6624	1.66564	2.02146	0.000122066
AT2G19970	0.864061	0.864573	2.99984	0.00173189
AT2G20100	0.76505	0.765729	2.65214	0.00254162
AT2G20180	0.98125	0.981584	3.83185	9.34433e-06
AT2G20340	1.03289	1.0334	3.45843	1.97295e-05
AT2G20450	0.544118	0.544155	6.30861	0.00716811
AT2G20490	1.14894	1.14915	5.11357	2.18834e-06
AT2G20560	1.27298	1.2734	3.93396	7.74853e-06
AT2G20570	1.42647	1.42654	6.62366	2.84943e-08
AT2G20610	0.481148	0.481174	6.88868	0.0036682
AT2G20710	1.14093	1.14241	2.33855	0.000242791
AT2G20940	0.766201	0.76662	3.51651	0.00283755
AT2G20950	0.472847	0.472933	5.01846	0.00760298
AT2G21150	0.474126	0.474238	4.58831	0.00338708
AT2G21185	0.965195	0.965528	4.36539	1.21033e-05
AT2G21250	0.489177	0.489244	5.57105	0.00143215
AT2G21340	0.588176	0.588244	5.75237	0.000291436
AT2G21370	0.810087	0.810338	4.198	3.29276e-05
AT2G21380	1.03252	1.03273	4.76721	1.39506e-06
AT2G21440	0.643033	0.643104	5.49125	0.00122557
AT2G21590	0.722661	0.723291	2.86133	0.000820894
AT2G21650	1.31027	1.3115	2.9558	0.000220059
AT2G21790	1.04308	1.04316	6.12509	1.10671e-05
AT2G22080	0.527326	0.527422	5.85842	0.00154701
AT2G22190	1.50762	1.50892	3.1569	1.39328e-07
AT2G22240	1.95544	1.95556	6.80027	6.47506e-07
AT2G22250	1.27507	1.27527	5.41326	2.83813e-07
AT2G22430	0.980108	0.980156	6.9941	8.41268e-06
AT2G22540	1.50623	1.50647	5.18661	2.48003e-07
AT2G22590	3.79087	3.79777	3.46147	0.00316789
AT2G22795	0.544462	0.544507	5.96793	0.00694271
AT2G22810	3.14959	3.19109	-0.751076	7.74689e-05
AT2G22860	1.25301	1.25694	0.970323	0.00110672
AT2G22870	0.743802	0.744043	3.88536	0.000163773
AT2G22900	0.471205	0.471351	4.4196	0.00935947
AT2G23000	2.2382	2.23883	4.75531	3.99057e-05
AT2G23010	1.11301	1.11694	2.60996	0.00572177
AT2G23120	0.544016	0.544052	6.82339	0.00210842
AT2G23340	0.90984	0.910186	4.14645	0.000792957
AT2G23430	0.669174	0.669437	3.79073	0.000919532
AT2G23470	0.744066	0.744777	2.54972	0.00219067
AT2G23760	0.622502	0.622648	4.51266	0.00224006
AT2G23790	0.604232	0.604357	5.98252	0.0021285
AT2G23840	2.99895	3.00132	3.19341	5.48408e-10
AT2G23910	2.15244	2.15328	4.94067	0.00293884
AT2G24010	1.81414	1.83728	0.635356	0.00135922
AT2G24040	0.569242	0.56973	2.92414	0.00936304
AT2G24120	0.58888	0.588947	5.59957	0.00177108
AT2G24350	1.06084	1.06331	1.44672	0.00279818
AT2G24680	1.19671	1.20123	0.828887	0.00377666
AT2G24762	1.02311	1.02341	4.62542	3.45069e-06
AT2G24850	2.89014	2.92445	3.02323	0.00586981
AT2G25000	1.0605	1.06092	3.90345	0.000114354
AT2G25110	0.483546	0.483614	5.67408	0.0084053
AT2G25140	0.599148	0.599268	4.89065	0.0014038
AT2G25160	0.985642	0.985889	4.67042	0.000438397
AT2G25200	1.75186	1.75589	1.23257	4.74597e-06
AT2G25355	0.991621	0.992421	3.01211	0.000214113
AT2G25510	2.4327	2.43295	6.76077	2.10901e-07
AT2G25570	0.652995	0.653501	3.01637	0.00196312
AT2G25625	2.97744	2.98273	2.30431	8.2722e-07
AT2G25900	1.0742	1.07441	4.61835	0.000359105
AT2G26010	4.55513	4.57169	1.78952	2.53876e-05
AT2G26020	4.97585	5.07352	-0.128782	7.40309e-06
AT2G26150	1.51214	1.51382	2.17563	8.40532e-05
AT2G26260	0.51656	0.516752	4.1632	0.00324458
AT2G26440	0.843001	0.843556	3.33671	0.000194108
AT2G26690	0.750098	0.750137	6.52854	0.000118176
AT2G26695	0.676562	0.677225	2.37298	0.00665348
AT2G26710	1.09281	1.09345	3.27232	4.56075e-06
AT2G26840	0.715577	0.716072	2.94983	0.000386503
AT2G26900	0.62006	0.620095	6.66889	2.88142e-05
AT2G27040	0.608412	0.608495	5.44618	0.0022368
AT2G27060	0.92986	0.930108	4.43837	1.98356e-06
AT2G27535	4.15872	4.58247	-1.36104	0.000214553
AT2G27550	1.37944	1.38036	4.45272	6.3351e-08
AT2G27760	0.552392	0.552863	2.71036	0.00769111
AT2G27840	0.938276	0.938418	5.31849	0.000369715
AT2G28250	0.507271	0.507421	4.27858	0.00755402
AT2G28720	0.723894	0.72415	3.93919	0.00110248
AT2G28740	0.690768	0.690923	4.69867	0.000422017
AT2G28930	0.634439	0.634726	3.77266	0.000571752
AT2G29120	1.14961	1.15012	3.46056	3.61411e-05
AT2G29170	1.52129	1.53156	-0.373147	0.00785385
AT2G29190	0.733954	0.734029	5.85349	0.000299742
AT2G29200	0.861928	0.862074	5.24827	0.00315353
AT2G29300	1.35532	1.35753	1.68864	0.00109447
AT2G29310	1.63448	1.63534	3.30718	3.794e-07
AT2G29320	1.45786	1.45842	3.90068	1.10936e-07
AT2G29360	0.74598	0.746081	5.10246	0.000694366
AT2G29370	1.74692	1.7489	2.45978	2.9867e-05
AT2G29410	1.06053	1.06617	0.30276	0.0087393
AT2G29500	1.61194	1.61342	2.82702	3.46716e-06
AT2G29540	0.910658	0.911505	2.7184	0.000974088
AT2G29650	0.89597	0.89602	6.42525	1.72812e-05
AT2G29670	2.30587	2.30638	5.80572	1.19914e-12
AT2G29690	0.476339	0.476454	4.54824	0.00565676
AT2G29990	0.564867	0.565215	3.51492	0.00456675
AT2G30320	0.559018	0.559251	3.752	0.00649354
AT2G30424	1.29022	1.29376	1.08069	0.0010957
AT2G30550	0.768787	0.769023	5.06392	0.000276316
AT2G30615	2.16591	2.18892	-0.730779	0.000607599
AT2G30766	0.762227	0.762315	4.81553	0.00686382
AT2G30933	1.24882	1.2543	1.02041	0.00123719
AT2G31060	0.520655	0.520722	5.73635	0.00925395
AT2G31110	0.637941	0.638305	3.47727	0.00125146
AT2G31140	0.703226	0.703426	4.32262	7.97045e-05
AT2G31160	0.852543	0.853214	2.83136	0.00150478
AT2G31180	1.71856	1.7261	0.76815	0.000533644
AT2G31230	2.0022	2.00429	3.18933	1.5287e-09
AT2G31730	1.1703	1.1711	3.01866	1.87836e-06
AT2G31790	0.494851	0.49488	6.66504	0.00651854
AT2G31830	1.17484	1.17937	0.432049	0.00533441
AT2G31840	0.65769	0.657863	4.28337	0.000667152
AT2G32090	0.686838	0.68707	4.18135	0.00227305
AT2G32100	2.32388	2.32686	2.45689	5.54931e-07
AT2G32160	2.70679	2.71616	1.40292	1.41519e-05
AT2G32290	1.15709	1.15849	2.2993	0.00334404
AT2G32400	0.577631	0.577833	4.04244	0.00336622
AT2G32487	1.31957	1.3217	2.8273	0.000318556
AT2G32560	1.36969	1.36989	5.44911	4.56772e-08
AT2G32580	0.557509	0.557606	5.03738	0.000869955
AT2G32690	0.678849	0.678876	7.1005	0.00572933
AT2G32720	0.7329	0.73301	5.31258	9.57854e-05
AT2G32940	0.789362	0.790702	1.84337	0.00756096
AT2G32970	0.685094	0.685332	4.25036	0.000482229
AT2G32990	1.19346	1.19377	4.59542	6.07146e-05
AT2G33050	0.816081	0.816363	4.26064	0.000348299
AT2G33380	4.47115	4.47628	3.74642	2.09661e-09
AT2G33620	0.553355	0.553525	4.26193	0.001544
AT2G33840	0.582673	0.582771	5.11209	0.000508682
AT2G34260	1.02181	1.0222	3.92238	9.73309e-05
AT2G34357	0.918034	0.918102	6.17401	0.000262747
AT2G34490	0.822385	0.822565	4.69856	0.00148507
AT2G34620	0.797681	0.797799	4.89634	0.00219181
AT2G34720	0.55814	0.55822	5.70615	0.000986703
AT2G34810	0.886956	0.887239	4.88572	0.00602152
AT2G35060	0.480944	0.480992	6.19681	0.00549807
AT2G35350	0.752139	0.752727	2.92326	0.00417771
AT2G35605	0.696713	0.697006	3.92816	0.00130651
AT2G35620	0.555582	0.555686	4.98834	0.00221327
AT2G35720	0.860174	0.860454	4.26118	2.99194e-05
AT2G35760	1.05011	1.0506	3.44351	1.49085e-05
AT2G35810	0.568279	0.568417	4.75866	0.000297031
AT2G35840	0.495892	0.495926	6.35492	0.0021809
AT2G35860	0.684265	0.684328	5.82406	0.00128246
AT2G36070	0.55183	0.55192	5.17231	0.00188669
AT2G36120	1.0567	1.05673	7.68027	4.42333e-07
AT2G36570	0.693102	0.693234	4.74715	6.68631e-05
AT2G36620	0.576482	0.576505	6.99125	0.00144358
AT2G36880	0.968502	0.968512	9.2867	3.2403e-05
AT2G36910	0.520699	0.520722	7.028	0.00360877
AT2G37040	1.03722	1.03723	9.43206	0.00345483
AT2G37300	0.662974	0.663611	2.7471	0.00616865
AT2G37400	0.550108	0.550258	4.46278	0.000996988
AT2G37460	0.920089	0.920321	4.62882	3.06866e-06
AT2G37470	0.534031	0.534165	4.29741	0.00564687
AT2G37585	0.577341	0.57767	3.44564	0.00502236
AT2G37600	0.927397	0.927503	5.42823	2.90209e-05
AT2G37760	0.916093	0.916189	5.88921	3.38001e-06
AT2G37770	1.7234	1.72412	4.38065	7.02588e-06
AT2G37790	0.590666	0.590873	4.09867	0.00144241
AT2G37870	4.44956	4.47856	1.87238	9.57564e-08
AT2G37990	0.798223	0.798322	5.49149	2.39829e-05
AT2G38010	1.29975	1.30036	3.84139	1.3002e-06
AT2G38540	0.748712	0.748721	8.80009	0.000288999
AT2G38640	0.76931	0.769801	3.11128	0.000364894
AT2G38710	0.576024	0.576121	5.19877	0.000725687
AT2G38740	0.648169	0.648292	6.48041	0.000152346
AT2G38940	1.01887	1.01904	8.25291	5.14948e-06
AT2G39020	0.555769	0.555858	5.13318	0.00450071
AT2G39030	6.2255	1.44269e+08	1.18525	0.00460422
AT2G39220	1.08041	1.08083	3.66615	3.08307e-06
AT2G39230	1.07883	1.0821	1.1335	0.00110374
AT2G39240	2.18578	2.20336	-0.0777974	0.000424567
AT2G39330	4.24234	4.33795	-0.140276	7.23967e-05
AT2G39700	0.64753	0.647578	6.50356	0.000314319
AT2G39705	0.977948	0.978614	3.22298	0.000277961
AT2G39800	1.68999	1.69014	7.75951	2.90218e-07
AT2G39850	1.44261	1.44325	3.4596	1.39153e-07
AT2G40100	0.749572	0.749636	5.93254	0.000374338
AT2G40390	0.799802	0.80081	2.14221	0.00377802
AT2G40430	0.496804	0.496838	6.1961	0.00207536
AT2G40435	4.07246	4.10281	0.633541	2.82737e-07
AT2G40460	1.28093	1.28122	4.72088	0.000411874
AT2G40475	1.41545	1.41595	4.19597	1.02128e-07
AT2G40530	1.32887	1.33468	0.877328	0.000667838
AT2G40590	0.526891	0.52694	5.85718	0.00623597
AT2G40840	1.03765	1.03776	5.95907	1.1104e-05
AT2G41090	2.15487	2.155	7.02769	8.42203e-09
AT2G41180	1.36564	1.36679	3.08115	1.24921e-05
AT2G41190	2.16595	2.16701	3.80871	3.62676e-07
AT2G41240	3.31326	3.31994	1.75032	4.83596e-05
AT2G41650	0.68337	0.683455	5.56329	0.000390664
AT2G41870	1.61076	1.61143	4.02728	3.24731e-07
AT2G42200	1.47413	1.4764	1.93803	3.06274e-06
AT2G42320	0.808389	0.808563	4.5836	1.46837e-05
AT2G42540	5.56971	5.62537	1.95932	8.51992e-08
AT2G42600	0.719408	0.719421	8.44324	6.434e-06
AT2G42610	1.07869	1.07915	3.22469	2.25937e-05
AT2G42710	0.599385	0.599505	4.97505	0.00441806
AT2G43010	2.33665	2.33785	3.62257	3.29469e-08
AT2G43020	1.32285	1.32305	5.3013	1.23135e-08
AT2G43060	0.804414	0.8049	3.46105	0.000139692
AT2G43100	0.952405	0.952482	6.61896	4.58904e-07
AT2G43240	0.503744	0.503932	3.98282	0.00580762
AT2G43500	0.854795	0.85525	4.01155	0.00207871
AT2G43530	1.00306	1.00435	2.89226	0.000293998
AT2G43535	0.673005	0.673148	7.20732	0.00106436
AT2G43550	0.879984	0.880766	2.85954	0.0014289
AT2G43650	1.24279	1.24292	5.60762	2.10775e-06
AT2G43870	1.13795	1.14191	2.03141	0.00131408
AT2G44160	0.695001	0.695018	7.81788	5.1629e-05
AT2G44210	1.02949	1.02958	5.89262	4.03523e-06
AT2G44230	0.501235	0.501357	4.3627	0.00452248
AT2G44300	0.551933	0.552136	4.02794	0.00432091
AT2G44460	4.62393	4.63527	4.51668	3.69217e-05
AT2G44860	0.469643	0.469683	5.93454	0.00967806
AT2G45280	0.618806	0.61934	2.82625	0.00695909
AT2G45290	0.541999	0.542047	6.46123	0.00333833
AT2G45300	0.503916	0.503941	6.74114	0.00547329
AT2G45560	0.939616	0.940071	3.83731	1.34245e-05
AT2G45660	0.932249	0.93264	3.35767	0.000846608
AT2G45690	0.621391	0.621832	3.14366	0.00115689
AT2G45710	0.539249	0.539407	4.24021	0.00375673
AT2G45860	0.755486	0.755867	3.39189	0.000438023
AT2G45900	1.01322	1.01401	2.81586	0.000316204
AT2G46100	0.507772	0.507838	5.34576	0.00491695
AT2G46390	0.768151	0.768326	4.71273	0.0016961
AT2G46440	1.21653	1.21736	3.50952	0.0029446
AT2G46535	0.925641	0.926046	3.79968	0.000317054
AT2G46650	0.603916	0.604001	6.05298	0.000197865
AT2G46660	0.597303	0.597822	3.30425	0.00330973
AT2G46680	1.7636	1.76409	4.58939	3.04248e-08
AT2G46860	1.28107	1.28471	3.39074	0.00039292
AT2G47180	1.19645	1.19664	4.88979	1.14383e-05
AT2G47190	2.49897	2.55169	-0.285116	0.00898141
AT2G47770	2.42803	2.44166	0.897796	0.00109971
AT2G47880	1.29579	1.29685	2.75139	0.00304075
AT2G48090	0.982984	0.984447	2.34152	0.000144567
AT3G01120	0.666165	0.666173	9.0055	8.42393e-05
AT3G01160	0.591149	0.591248	4.95641	0.00259619
AT3G01730	1.75647	1.78677	0.977483	0.00351405
AT3G01800	0.716004	0.716303	3.78616	0.000478647
AT3G01810	0.715567	0.715661	5.35339	1.49987e-05
AT3G01950	0.706172	0.706709	3.76079	0.00158467
AT3G01990	0.919831	0.921024	2.48505	0.00115768
AT3G02020	0.788871	0.78894	6.86633	6.54769e-05
AT3G02050	0.490772	0.490831	5.74766	0.0042813
AT3G02190	0.510723	0.510926	4.00997	0.00668182
AT3G02250	0.774124	0.774264	4.9167	0.000107179
AT3G02480	3.88081	3.89234	1.89092	2.44658e-05
AT3G02570	0.639741	0.639809	5.7984	0.000239309
AT3G02720	0.450564	0.450608	5.69588	0.00400836
AT3G02830	0.692298	0.692334	6.6621	6.79578e-05
AT3G02870	0.66679	0.666922	6.18565	0.000130702
AT3G02885	1.21499	1.21571	2.96479	0.00148147
AT3G02920	0.549921	0.550316	3.02755	0.00729684
AT3G03190	0.95876	0.959478	3.29708	0.000157721
AT3G03270	0.549322	0.549436	4.91906	0.00554606
AT3G03341	4.70279	4.82306	-0.507652	1.02118e-06
AT3G03470	1.04549	1.04589	3.88409	0.00021896
AT3G03530	1.52901	1.5306	6.78835	1.71443e-07
AT3G03660	2.38866	2.45741	0.440419	0.00197567
AT3G03770	1.66638	1.66659	5.51715	2.61405e-08
AT3G03780	2.52819	2.52822	9.33444	7.96216e-09
AT3G03920	0.715152	0.715205	6.23901	0.00067344
AT3G04290	0.605836	0.605887	5.83245	0.00210172
AT3G04420	0.851448	0.852334	3.81405	0.00356165
AT3G04520	0.841965	0.842179	4.58952	6.23708e-06
AT3G04530	0.970354	0.971873	4.03357	0.00200807
AT3G04710	0.771644	0.771832	4.57041	0.000718986
AT3G04720	0.881998	0.882042	7.95256	0.00219078
AT3G04870	0.52998	0.530001	6.97822	0.0018903
AT3G05030	1.30745	1.30797	4.20789	5.00737e-05
AT3G05060	0.733223	0.733265	6.58706	0.000566473
AT3G05165	0.662295	0.662329	6.91146	0.000118749
AT3G05290	0.55917	0.559369	4.22486	0.00214683
AT3G05380	0.507211	0.507339	4.66199	0.00644342
AT3G05400	2.56748	2.56934	4.10581	3.20294e-06
AT3G05510	0.558509	0.558944	3.17937	0.00554798
AT3G05630	1.30531	1.30732	6.44743	2.12393e-07
AT3G05640	1.50443	1.50607	2.71041	3.9282e-05
AT3G05650	1.34204	1.3473	0.931301	0.00366194
AT3G05690	1.18106	1.18139	5.34142	7.72037e-08
AT3G05910	0.529355	0.529395	6.27502	0.000327763
AT3G05936	1.53216	1.53534	1.68301	2.48904e-05
AT3G06020	0.749703	0.751025	2.55816	0.00717887
AT3G06035	0.908648	0.908916	4.66596	8.6344e-06
AT3G06350	0.53119	0.531213	6.9426	0.000905071
AT3G06530	1.09401	1.0941	6.15119	0.000320159
AT3G06550	0.517407	0.517452	6.00192	0.00114975
AT3G06680	1.09081	1.09099	4.94975	9.97826e-07
AT3G06930	0.734881	0.735009	5.11067	4.43418e-05
AT3G07030	0.741	0.741258	4.0918	0.00131617
AT3G07090	1.11818	1.1183	5.79957	2.37461e-08
AT3G07230	0.952873	0.952957	5.92368	6.26764e-07
AT3G07310	1.12069	1.12084	5.20371	1.32109e-06
AT3G07390	1.11736	1.11758	5.27069	8.33993e-07
AT3G07540	0.752956	0.753343	3.42422	0.00201143
AT3G07590	0.906183	0.906715	3.39116	0.000115234
AT3G07750	0.736875	0.737189	3.77423	0.00128316
AT3G07770	1.28227	1.28235	6.57865	9.59854e-06
AT3G07860	0.846777	0.847361	3.18134	0.00023362
AT3G07940	0.53247	0.53262	4.41067	0.00162496
AT3G07970	0.876635	0.878665	1.5953	0.00369706
AT3G08520	1.08554	1.08565	5.7414	1.23432e-06
AT3G08610	0.555854	0.555884	6.7406	0.00267064
AT3G08690	0.490075	0.490162	5.17656	0.00597167
AT3G08860	4.37847	4.38353	4.30961	2.39911e-11
AT3G08870	1.51587	1.5207	1.10964	0.00339759
AT3G09350	0.839676	0.839846	4.65144	5.7176e-05
AT3G09390	1.16884	1.16888	8.28162	6.28034e-06
AT3G09440	1.37305	1.37307	9.02284	3.36076e-08
AT3G09540	0.742351	0.742791	3.37724	0.000543449
AT3G09680	1.46276	1.47011	0.569126	0.00218482
AT3G09700	0.60227	0.602708	3.03882	0.00453614
AT3G09720	0.76765	0.767881	4.2041	0.000519422
AT3G09820	0.556744	0.556756	8.17166	0.00179145
AT3G09922	1.94282	2.01801	7.86257	0.00822587
AT3G09980	0.533947	0.534004	5.60117	0.00259152
AT3G10090	1.18324	1.18383	3.48729	6.79797e-05
AT3G10110	0.966381	0.967151	2.94297	0.000392961
AT3G10130	0.598139	0.59827	4.80371	0.000664568
AT3G10360	0.472171	0.47225	5.38529	0.00559719
AT3G10370	0.580314	0.580416	5.23693	7.4673e-05
AT3G10420	0.561718	0.561742	7.80851	0.00289181
AT3G10450	0.796502	0.796991	3.32976	0.000435729
AT3G10520	1.35573	1.35613	4.54911	2.9195e-06
AT3G10525	0.666075	0.666217	4.68418	0.00104565
AT3G10530	0.75015	0.750345	4.47931	0.000256717
AT3G10860	0.573797	0.573835	6.59967	0.000857866
AT3G10940	0.812828	0.813203	3.74305	8.16774e-05
AT3G11120	1.09486	1.09507	4.8567	7.49934e-06
AT3G11250	0.618986	0.619063	5.59331	0.000838745
AT3G11410	0.890404	0.890515	5.86039	0.00190226
AT3G11470	0.679306	0.679729	3.09667	0.00189802
AT3G11660	0.73012	0.730223	5.64605	0.000223376
AT3G11670	0.753249	0.7533	6.82519	9.15863e-06
AT3G11690	0.86533	0.865638	4.26338	0.000104892
AT3G11710	0.717176	0.717201	7.24016	0.000255803
AT3G11720	0.757682	0.757991	3.78451	0.00047194
AT3G11964	0.879554	0.879618	6.31093	0.000757666
AT3G12050	0.678942	0.678995	6.12561	0.000108479
AT3G12200	0.526472	0.526569	4.96558	0.00125023
AT3G12270	0.702667	0.702831	4.63969	0.00124645
AT3G12280	0.697226	0.69729	5.81268	0.000112181
AT3G12340	0.64263	0.642944	3.58233	0.00415832
AT3G12520	1.57971	1.58063	4.1605	3.58267e-08
AT3G12580	2.36431	2.36441	7.12226	3.85364e-08
AT3G12670	0.638749	0.638792	6.41067	0.000324697
AT3G12860	1.0066	1.00712	3.62224	0.000681013
AT3G13150	0.701598	0.702004	3.35824	0.0029981
AT3G13470	1.34187	1.34191	7.51572	1.38953e-07
AT3G13570	0.586855	0.58692	5.67227	0.000698962
AT3G13620	0.571872	0.572062	3.96727	0.000453784
AT3G13650	1.2317	1.2325	3.41172	5.55161e-06
AT3G13672	1.93117	1.93933	0.670777	0.000854265
AT3G13784	4.78444	4.85454	0.337079	4.37554e-07
AT3G13810	0.845929	0.846211	4.23597	4.22277e-05
AT3G13860	0.729816	0.729923	5.34471	0.00034478
AT3G14020	1.46052	1.46167	3.24515	5.27186e-08
AT3G14060	0.757672	0.758278	2.98598	0.00297905
AT3G14067	0.702893	0.702907	8.01781	0.000377252
AT3G14210	2.60589	2.60598	7.46512	2.33502e-11
AT3G14370	1.35951	1.36349	1.85264	0.00120597
AT3G14570	0.669601	0.669814	4.41594	0.00573845
AT3G14620	1.35422	1.35444	5.62218	1.80127e-05
AT3G14720	1.05237	1.05248	6.03454	1.74377e-06
AT3G14780	0.937745	0.939427	1.90407	0.000807643
AT3G14890	0.757643	0.757888	4.12036	0.000899491
AT3G14940	0.885517	0.885536	9.03028	1.33953e-05
AT3G15000	0.524552	0.524582	6.81212	0.00746976
AT3G15350	0.851823	0.852101	4.20882	1.38731e-05
AT3G15353	0.683992	0.683999	9.20834	0.00584509
AT3G15460	0.731827	0.732165	3.731	0.000590164
AT3G15510	0.8902	0.890792	2.70791	0.000383191
AT3G15540	1.62988	1.63171	2.37639	4.54146e-06
AT3G15570	2.00603	2.00743	2.88538	6.34026e-08
AT3G15650	1.30456	1.30589	2.72791	1.47776e-05
AT3G15670	3.89641	3.95602	-0.0411878	0.000393853
AT3G15990	0.733947	0.734371	4.83983	0.00017676
AT3G16010	0.618876	0.619385	2.78684	0.00516163
AT3G16080	0.630969	0.631004	6.57566	0.000641328
AT3G16150	2.73373	2.73452	4.50181	1.08042e-09
AT3G16650	0.86872	0.870062	2.06759	0.0035861
AT3G16780	0.64828	0.648321	6.45232	0.00227
AT3G16810	0.966319	0.966449	5.38344	5.67728e-05
AT3G16840	0.582036	0.582109	5.45118	0.00166004
AT3G17120	1.2241	1.22447	4.58167	4.08937e-06
AT3G17170	0.578168	0.578254	4.86137	0.000238201
AT3G17330	0.782091	0.78224	4.55435	0.000170686
AT3G17390	0.554422	0.554427	9.5076	0.00228964
AT3G17520	4.12638	4.17041	0.479439	0.000394844
AT3G17830	0.741139	0.741765	2.74545	0.0096067
AT3G17930	0.733184	0.733259	5.82681	0.000427834
AT3G18130	0.591605	0.591637	6.63091	0.00695979
AT3G18160	0.800478	0.800826	3.5906	0.000110915
AT3G18210	0.892297	0.892545	4.42329	7.69204e-06
AT3G18280	0.803686	0.803769	5.88398	3.18058e-06
AT3G18290	0.923983	0.924021	6.82488	1.27703e-06
AT3G18490	0.520831	0.520844	7.90406	0.00329372
AT3G18500	0.629291	0.629499	3.96059	0.000746796
AT3G18580	0.670351	0.670867	3.06934	0.00728002
AT3G18600	0.829484	0.829583	5.51073	0.000212556
AT3G18610	0.870269	0.871908	1.59942	0.00727033
AT3G18830	0.721677	0.721797	5.77007	6.19373e-05
AT3G18850	1.01745	1.01855	2.27428	0.000175158
AT3G19000	0.808196	0.808302	5.43647	4.20095e-07
AT3G19150	0.677053	0.677414	3.58971	0.00129239
AT3G19370	0.535405	0.535463	5.58357	0.000979373
AT3G19620	1.17605	1.17819	2.48683	0.00205279
AT3G19640	0.430871	0.430953	5.07187	0.00656933
AT3G19650	0.551905	0.552166	3.60745	0.00216811
AT3G19710	0.984339	0.98439	7.87911	2.18703e-07
AT3G19790	0.570592	0.570957	3.26774	0.00613157
AT3G19840	0.63883	0.63903	4.27744	0.000184459
AT3G20070	0.563323	0.56365	3.12083	0.00342631
AT3G20100	0.558962	0.559033	5.3474	0.000721886
AT3G20120	0.499362	0.499586	3.86802	0.00507695
AT3G20240	1.14035	1.14098	3.34145	8.38614e-05
AT3G20300	1.25806	1.25861	3.76061	1.05182e-06
AT3G20380	0.668531	0.668869	3.84983	0.0028895
AT3G20470	1.34899	1.34961	4.13463	2.07993e-05
AT3G20500	0.779403	0.779594	4.74903	7.46723e-05
AT3G20540	0.552288	0.552369	5.2265	0.00162745
AT3G20710	1.81434	1.839	-0.175034	0.00916389
AT3G21060	0.665004	0.665407	3.23067	0.00621593
AT3G21080	1.25676	1.2619	0.911425	0.00150365
AT3G21190	0.767894	0.768004	5.44795	0.000105032
AT3G21330	1.90263	1.90944	1.26737	1.03812e-05
AT3G21360	0.721381	0.722071	3.10597	0.00287348
AT3G21420	0.670128	0.670559	4.01046	0.000555394
AT3G21480	0.711513	0.711806	3.72021	0.00170756
AT3G21520	2.38498	2.39453	2.1468	5.37413e-05
AT3G21540	0.783896	0.784056	4.80115	0.00171107
AT3G21700	0.689593	0.689903	3.96026	0.000174153
AT3G21720	1.7633	1.76452	6.62748	0.00159084
AT3G22100	4.42293	4.57989	-0.590003	0.000188389
AT3G22210	0.665043	0.665201	4.35646	0.000512789
AT3G22231	6.51949	6.57862	3.63904	3.89497e-06
AT3G22235	4.45747	4.46392	4.75914	1.23151e-06
AT3G22310	0.87972	0.879821	5.79437	0.0011586
AT3G22330	0.588856	0.588921	5.70396	0.000399914
AT3G22425	0.683622	0.683832	4.13358	0.000141556
AT3G22540	1.18484	1.18801	0.944334	0.00388558
AT3G22550	1.47531	1.47563	4.73609	6.33858e-08
AT3G22560	2.69525	2.72255	-0.19713	2.95946e-05
AT3G22660	0.565721	0.565804	5.20839	0.0034835
AT3G22740	1.32493	1.32713	3.20459	0.000221634
AT3G22890	0.636766	0.636773	9.53571	0.000206871
AT3G23120	2.35853	2.38168	1.19705	0.00198218
AT3G23340	0.613279	0.613588	3.64174	0.00229878
AT3G23370	1.03532	1.03707	1.9747	0.00368852
AT3G23450	1.76732	1.76797	3.88198	5.38298e-08
AT3G23570	0.644827	0.644958	5.19404	0.00146298
AT3G23580	1.03033	1.03053	4.80569	7.46077e-06
AT3G23790	0.762311	0.762725	3.84809	0.00065064
AT3G23810	2.06367	2.0637	8.80042	1.73308e-05
AT3G23820	0.662053	0.66207	7.87684	0.000192104
AT3G23830	0.773981	0.774123	5.24864	0.000542448
AT3G23840	0.846866	0.847342	3.84157	0.00210571
AT3G23920	0.664508	0.664531	7.67072	0.00103814
AT3G23990	0.897192	0.89722	7.65918	0.000306639
AT3G24310	2.91107	2.96052	-0.702423	0.000126162
AT3G24495	0.642713	0.643021	3.54492	0.00657119
AT3G24770	0.774587	0.774855	4.19654	2.85567e-05
AT3G25130	1.00991	1.01125	2.30675	0.0003323
AT3G25230	1.00656	1.0066	7.12751	7.94689e-06
AT3G25560	0.434973	0.435069	4.89983	0.00858149
AT3G25717	1.35056	1.35125	3.55718	2.65314e-06
AT3G25730	1.31778	1.31905	3.36729	1.22336e-06
AT3G25760	1.23567	1.23619	5.71737	6.66545e-06
AT3G25770	1.46257	1.46355	5.79112	1.91494e-06
AT3G25790	1.00783	1.00838	4.53347	1.74561e-05
AT3G25940	0.65804	0.658649	2.61405	0.00840731
AT3G26170	1.53348	1.53641	1.85758	0.000906548
AT3G26230	1.20978	1.21069	2.85514	0.000447116
AT3G26280	1.19638	1.19686	3.88795	3.78759e-05
AT3G26290	2.93886	2.93957	4.8953	7.7207e-09
AT3G26310	0.96135	0.961838	3.31089	2.63208e-05
AT3G26450	1.6403	1.64037	7.0795	1.00228e-08
AT3G26460	1.59648	1.59767	3.42292	5.9337e-06
AT3G26740	2.16351	2.16448	4.42396	7.27033e-06
AT3G26840	1.40448	1.40553	3.48127	4.65681e-07
AT3G26932	0.872633	0.87307	3.46101	0.000183725
AT3G26960	3.26801	3.27391	2.23048	5.49562e-07
AT3G27150	0.684351	0.684626	4.80226	0.000844438
AT3G27230	0.436671	0.43674	5.30826	0.0059709
AT3G27250	4.16489	4.1906	1.81521	2.46725e-07
AT3G27280	0.687005	0.68716	4.90721	0.00306306
AT3G27550	1.08517	1.08597	2.95225	4.86436e-05
AT3G27570	0.765931	0.766007	5.93721	0.000106543
AT3G27660	1.86971	1.87297	1.39859	3.8169e-06
AT3G27820	0.514884	0.514906	7.22797	0.00417323
AT3G28007	2.75135	2.77582	0.557154	8.08766e-05
AT3G28070	2.04249	2.0432	4.14676	1.37494e-08
AT3G28080	1.1655	1.16613	3.40425	3.55158e-05
AT3G28100	1.18044	1.18118	3.48108	8.27518e-06
AT3G28130	1.32587	1.3269	2.926	5.18004e-07
AT3G28270	0.772242	0.77232	6.04107	0.000387902
AT3G28510	3.77082	3.86442	2.46862	4.73015e-05
AT3G28540	2.24162	2.24417	2.2617	7.24855e-06
AT3G28760	0.661263	0.661666	3.215	0.0022279
AT3G28930	0.840976	0.841393	3.93195	0.00156174
AT3G29090	0.486946	0.487135	3.99217	0.00896552
AT3G29320	0.855722	0.855826	5.47337	2.67009e-05
AT3G29590	2.51926	2.5282	2.9287	0.00129875
AT3G29633	1.51699	1.54284	-0.59446	0.003599
AT3G29760	0.611363	0.611482	4.88458	0.000376067
AT3G29780	0.73769	0.738508	2.43698	0.00467505
AT3G30725	3.1749	3.57729	2.87949	0.00473455
AT3G42660	0.564098	0.564272	4.14658	0.00885904
AT3G43190	1.49751	1.49869	4.35528	1.15438e-05
AT3G43800	0.916233	0.916358	5.57023	5.50675e-06
AT3G43980	0.62655	0.626708	4.44515	0.00188942
AT3G44110	0.577403	0.577413	8.38494	0.000224262
AT3G44290	1.36398	1.38832	0.718795	0.00449763
AT3G44300	1.05867	1.05875	6.76019	0.000197536
AT3G44310	1.26779	1.2678	10.1994	3.25358e-07
AT3G44550	0.634075	0.634217	5.03262	0.000240192
AT3G44750	1.03694	1.03703	6.13448	0.000111822
AT3G44860	5.33205	5.45396	1.63542	5.64648e-05
AT3G44970	0.718125	0.718216	6.12301	0.00227242
AT3G44990	1.40378	1.40383	7.04918	1.10261e-07
AT3G45140	2.54998	2.5502	7.19359	3.81624e-07
AT3G45160	0.645334	0.645416	5.37799	0.00123314
AT3G45260	0.810213	0.810594	3.40698	0.000610088
AT3G45680	1.30348	1.30439	2.90182	0.00209276
AT3G45860	1.74311	1.76333	0.740937	0.00622561
AT3G45960	1.47025	1.48302	-0.118925	0.00453114
AT3G46090	1.43573	1.43847	1.21791	0.00316618
AT3G46230	3.4121	3.4325	0.966502	0.000166028
AT3G46430	0.680374	0.680441	5.9875	3.43586e-05
AT3G46450	0.459051	0.459114	5.42574	0.00609174
AT3G46540	0.554766	0.554873	4.74188	0.000510598
AT3G46560	0.513372	0.513468	4.8986	0.00608157
AT3G46590	0.73876	0.738836	6.00428	5.90479e-06
AT3G46670	1.32332	1.3239	3.80553	1.63272e-06
AT3G46940	0.66442	0.664601	4.26004	0.000193634
AT3G46970	1.86204	1.86249	5.71614	1.36347e-08
AT3G47510	0.814078	0.81474	3.3204	0.00148682
AT3G47540	1.11023	1.11123	3.21093	9.28693e-05
AT3G48150	0.541916	0.542237	3.36219	0.00797732
AT3G48240	1.53113	1.5342	2.41917	3.05966e-06
AT3G48250	0.821801	0.822403	3.02567	0.00146092
AT3G48440	0.572394	0.572846	2.98748	0.00512577
AT3G48510	1.70291	1.71732	0.0505201	0.000252683
AT3G48660	1.23243	1.23677	1.00528	0.000435434
AT3G48830	0.767312	0.768527	2.12005	0.00197412
AT3G49110	1.18381	1.18418	4.46824	1.10115e-05
AT3G49240	1.10823	1.10861	4.02584	0.000511335
AT3G49570	2.56825	2.57083	4.14042	4.55064e-09
AT3G49580	2.53834	2.53959	5.01612	1.44158e-07
AT3G49680	0.542094	0.542121	6.82991	0.000447872
AT3G50070	0.536999	0.537157	4.53087	0.00447954
AT3G50100	0.749629	0.750378	2.39038	0.00163068
AT3G50340	0.545829	0.546054	3.8244	0.00239052
AT3G50440	1.33483	1.33555	3.44418	3.5481e-05
AT3G50610	2.52727	2.56973	0.201186	0.000863922
AT3G50760	0.838383	0.839453	2.87164	0.000800808
AT3G50770	1.42806	1.43295	2.12196	0.00198198
AT3G50840	0.69196	0.692481	2.74336	0.000780388
AT3G50980	1.75938	1.77529	-0.476092	0.00439284
AT3G51000	0.645478	0.645599	5.15197	0.000533093
AT3G51220	1.23972	1.24828	0.20057	0.0031519
AT3G51430	0.524246	0.52442	4.57275	0.00434724
AT3G51800	0.672062	0.672083	7.38654	0.000189338
AT3G51860	0.910415	0.91066	5.85698	0.000106007
AT3G51895	1.48608	1.48673	3.68275	9.94318e-08
AT3G51940	0.652816	0.65371	2.13961	0.00318805
AT3G52040	0.796093	0.796376	3.8684	0.000564746
AT3G52070	1.19147	1.19338	1.69003	0.00238094
AT3G52105	0.910363	0.91123	2.62891	0.0056033
AT3G52170	0.969978	0.9703	4.0657	0.000132836
AT3G52180	1.38034	1.38099	4.82817	2.6988e-07
AT3G52190	0.465261	0.465393	5.97875	0.00252325
AT3G52220	0.4899	0.489968	5.2418	0.00178079
AT3G52360	0.62729	0.627369	5.41309	0.000252576
AT3G52370	0.909887	0.91004	5.2415	1.52214e-05
AT3G52630	0.777607	0.778267	2.67726	0.00121648
AT3G52880	0.460291	0.460301	7.98341	0.00555124
AT3G53020	0.497847	0.497857	8.16349	0.00612328
AT3G53230	1.01471	1.01486	5.34253	6.86249e-06
AT3G53235	1.72504	1.72868	1.6698	3.99175e-06
AT3G53540	0.481446	0.48155	4.78316	0.00592862
AT3G53620	0.641926	0.642071	6.72519	0.000215148
AT3G53830	1.8786	1.87917	4.1242	0.000169849
AT3G53940	0.708162	0.708748	2.82977	0.00270875
AT3G54085	0.571749	0.572152	2.95207	0.00681339
AT3G54280	0.744897	0.744959	6.02735	0.000656851
AT3G54460	0.492082	0.492156	5.05251	0.00207541
AT3G54470	0.504393	0.504425	6.42064	0.00922162
AT3G54600	1.21041	1.21051	6.49094	2.30832e-08
AT3G54740	0.488814	0.48908	3.6787	0.00781762
AT3G54820	0.884146	0.884584	3.79874	0.000101689
AT3G55010	0.988392	0.988523	5.36753	4.17064e-06
AT3G55120	1.84458	1.84474	6.39914	0.000487572
AT3G55130	0.880946	0.881148	4.75813	0.000176768
AT3G55240	2.26744	2.27035	2.0975	3.26619e-05
AT3G55290	1.00912	1.00987	3.26806	0.00010201
AT3G55510	0.745725	0.745913	4.49582	0.00084198
AT3G55515	2.24481	2.28174	-0.651403	0.00286489
AT3G55750	0.618159	0.618188	6.87215	0.00112417
AT3G55760	1.53331	1.53416	3.64894	5.81679e-07
AT3G55970	2.49629	2.53478	2.19846	0.00303335
AT3G56020	0.718335	0.718495	4.66674	0.000859063
AT3G56070	1.07509	1.07521	5.78384	3.36128e-05
AT3G56080	0.777231	0.77759	3.77769	3.05672e-05
AT3G56120	0.531626	0.531776	4.26449	0.0052063
AT3G56330	0.705956	0.706865	1.94672	0.0052488
AT3G56400	0.953738	0.954124	4.26607	0.00210079
AT3G56510	0.576391	0.576524	4.56505	0.000542265
AT3G56620	0.813179	0.815238	2.38023	0.00668182
AT3G56710	1.36741	1.37107	2.14606	0.00132612
AT3G56970	2.51042	2.5148	1.65071	0.00016443
AT3G56980	1.75663	1.7583	2.22114	2.21375e-06
AT3G56990	0.583638	0.583724	5.2308	0.00712727
AT3G57000	0.831657	0.831803	4.94083	9.67328e-06
AT3G57010	0.71413	0.714222	5.65552	0.00807098
AT3G57062	1.09969	1.10016	3.68339	2.38912e-06
AT3G57150	0.723336	0.723362	7.33831	0.00238206
AT3G57260	3.19284	3.21993	2.90003	0.000155382
AT3G57460	3.09469	3.20548	1.21962	0.00344594
AT3G57660	1.06043	1.06054	5.69707	0.000170878
AT3G57680	1.89809	1.90378	1.20789	4.63388e-05
AT3G57780	0.70919	0.709512	3.76649	0.00010298
AT3G57940	0.684038	0.684225	4.42617	0.00396099
AT3G58270	1.15637	1.15915	2.17168	0.000757922
AT3G58470	0.4959	0.496043	4.25162	0.00745093
AT3G58990	0.854381	0.854463	6.51787	1.74659e-05
AT3G59140	0.976542	0.976678	6.14852	0.000139464
AT3G59650	0.664118	0.664442	3.59777	0.00200994
AT3G59670	0.965903	0.966079	4.90681	0.00022006
AT3G59710	1.38542	1.39029	1.5287	3.50972e-05
AT3G59810	0.577642	0.577908	3.72475	0.00466626
AT3G59930	1.48106	1.48207	2.99274	1.83395e-06
AT3G59940	1.11873	1.11886	5.43445	0.000106196
AT3G59970	0.533221	0.533229	8.40438	0.00301377
AT3G60140	2.58485	2.58735	3.30324	0.000433783
AT3G60160	1.24979	1.25083	2.79093	3.1151e-05
AT3G60245	0.529387	0.529398	8.08743	0.00853633
AT3G60380	0.575908	0.576058	4.47343	0.00164762
AT3G60660	1.0018	1.0039	1.66115	0.00221055
AT3G60890	1.40023	1.41634	-0.963509	0.00583035
AT3G61130	0.415573	0.415598	6.53846	0.00758057
AT3G61370	0.745942	0.746683	2.67213	0.00687004
AT3G61400	2.34508	2.37959	0.247082	0.00212906
AT3G61820	0.892416	0.892546	5.61675	6.94028e-07
AT3G61880	1.81903	1.82301	2.77655	1.21567e-06
AT3G61890	1.14476	1.14501	4.73115	0.000471816
AT3G61900	1.05936	1.06247	1.02026	0.0014184
AT3G61950	1.24845	1.25127	1.30848	0.000239365
AT3G61970	0.786524	0.787723	1.83397	0.00309819
AT3G61990	0.48921	0.489286	5.48674	0.00414326
AT3G62270	0.802515	0.802579	6.55386	3.59727e-05
AT3G62310	0.435941	0.435975	6.15203	0.0088274
AT3G62460	0.659774	0.660113	3.46614	0.00700944
AT3G62550	1.62718	1.63575	1.33083	0.00933379
AT3G62580	0.511559	0.511608	6.12991	0.00137532
AT3G62590	0.753784	0.754549	2.95702	0.00237527
AT3G62600	0.630595	0.630663	6.03011	0.000851792
AT3G62740	0.978888	0.979554	2.53229	0.0035533
AT3G62960	1.83955	1.84524	1.02781	0.000230012
AT3G63000	0.548509	0.54859	5.38762	0.000241596
AT3G63090	0.61547	0.615918	3.01559	0.00469515
AT3G63480	0.872557	0.873927	1.86506	0.00878871
AT3G66652	0.683804	0.684132	3.42397	0.00673951
AT4G00620	0.873202	0.873399	4.63902	0.000966523
AT4G00630	0.576897	0.576944	6.69887	0.00046828
AT4G00670	0.805299	0.805906	2.93023	0.000374659
AT4G01060	1.98544	1.99063	2.2477	2.2606e-06
AT4G01080	2.17909	2.18005	3.95302	0.000597957
AT4G01550	0.716621	0.717131	3.51213	0.000452112
AT4G01840	0.55518	0.555635	2.75846	0.00940604
AT4G02060	0.644403	0.644525	4.8399	0.00274352
AT4G02280	0.88625	0.886483	4.89752	3.32681e-05
AT4G02290	1.1757	1.17586	5.61211	1.23076e-06
AT4G02340	0.438072	0.438228	4.36534	0.00892289
AT4G02360	1.61638	1.62368	1.34283	0.000104852
AT4G02400	0.599016	0.599098	5.24288	0.00263053
AT4G02590	0.429459	0.42952	5.54591	0.00654146
AT4G02630	0.819134	0.819455	3.86866	0.000761127
AT4G03050	1.19168	1.1953	0.903865	0.00255625
AT4G03070	0.842851	0.843539	2.64446	0.00189343
AT4G03400	0.576298	0.57637	5.59839	0.00288932
AT4G03410	0.645503	0.64576	3.77788	0.00130706
AT4G03420	0.618026	0.618201	4.268	0.00132848
AT4G03450	3.29764	3.33617	0.685104	2.45087e-05
AT4G03960	0.798832	0.799656	5.19465	0.000138499
AT4G04020	3.11757	3.11773	7.2338	1.75686e-10
AT4G04210	0.439176	0.439234	5.58894	0.00473465
AT4G04470	0.635131	0.635305	4.61377	0.000122992
AT4G04610	0.536539	0.536558	8.24522	0.00948797
AT4G04670	0.779583	0.779885	3.8716	0.00134085
AT4G04745	1.06112	1.06178	3.45315	5.18946e-05
AT4G04750	1.30212	1.30272	4.33376	0.000292843
AT4G04810	1.03407	1.03512	3.10535	0.00014462
AT4G04830	0.774199	0.774252	6.91924	0.000242976
AT4G04940	0.846992	0.847181	4.72648	0.00285023
AT4G05020	0.534191	0.534237	6.69137	0.00577939
AT4G05070	0.633401	0.633521	4.55161	0.00759042
AT4G05410	0.543955	0.544074	4.64404	0.00815261
AT4G06634	0.543851	0.544057	3.89438	0.00132177
AT4G08170	0.629686	0.630019	3.50422	0.000505686
AT4G08230	1.27475	1.27548	3.32248	1.64984e-06
AT4G08555	1.08849	1.08953	2.86116	0.00500152
AT4G08685	0.576144	0.576314	4.28382	0.00875359
AT4G08870	0.830675	0.830719	6.62175	0.00229329
AT4G08920	0.482814	0.48284	6.64051	0.00570447
AT4G09020	0.729689	0.73007	4.12261	0.00225391
AT4G09350	0.815324	0.815459	4.91574	0.000445718
AT4G09500	1.86669	1.86897	2.83776	2.18759e-07
AT4G09510	0.949519	0.949741	4.48679	7.80362e-05
AT4G09750	0.935752	0.935874	5.79574	8.99221e-05
AT4G09760	1.30359	1.30392	4.9231	1.90427e-09
AT4G09820	2.63673	2.65743	2.15821	0.000517617
AT4G09890	1.51033	1.51087	4.07284	2.15093e-07
AT4G09900	3.01511	3.01721	3.54526	1.05987e-12
AT4G10000	0.687062	0.687473	3.16292	0.0023211
AT4G10120	1.21417	1.21421	7.94464	8.54687e-08
AT4G10430	0.585976	0.58606	5.3169	0.000269721
AT4G10760	0.502242	0.502341	4.75372	0.00298613
AT4G10770	1.66391	1.66419	5.21925	7.16666e-10
AT4G11060	0.640789	0.641181	3.39729	0.000853115
AT4G11120	0.505961	0.506078	4.76339	0.00533537
AT4G11175	0.569547	0.56962	5.15838	0.00486003
AT4G11570	0.534377	0.534398	7.08422	0.00487352
AT4G11740	0.479224	0.479314	4.83618	0.00433749
AT4G11990	0.853948	0.855756	1.60492	0.00562529
AT4G12030	0.77736	0.777481	5.78409	0.000418058
AT4G12290	2.11892	2.12022	4.52694	3.40994e-11
AT4G12300	0.516322	0.516483	4.39295	0.00505564
AT4G12320	1.32159	1.32175	5.73326	1.67864e-05
AT4G12400	1.30488	1.30518	4.43658	6.92427e-06
AT4G12440	1.20419	1.20887	1.85799	0.00384741
AT4G12490	1.8652	1.86716	3.63204	0.000150002
AT4G12495	7.44278	8.39654	-0.325481	0.000144304
AT4G12500	1.07557	1.07804	2.94413	0.00695568
AT4G12580	1.31763	1.32584	0.208149	0.00313861
AT4G12750	0.927047	0.927627	3.55431	0.000586558
AT4G12880	0.814727	0.814832	5.62928	3.91873e-05
AT4G12910	0.731332	0.731628	4.23445	0.000209006
AT4G12980	0.873014	0.873135	4.99292	8.46756e-06
AT4G13070	0.727153	0.727828	2.66441	0.00246251
AT4G13235	0.992936	0.994121	2.49529	0.000535228
AT4G13260	0.920043	0.921366	2.17775	0.00231998
AT4G13280	2.03453	2.03763	1.71392	1.74001e-05
AT4G13290	1.55413	1.55531	2.60683	0.000212558
AT4G13520	0.646567	0.646658	5.31585	0.00133249
AT4G13540	0.762842	0.764148	1.65908	0.00896596
AT4G13550	0.534407	0.534485	5.19166	0.000362044
AT4G13575	0.892316	0.892512	4.42467	0.00106132
AT4G13750	1.37967	1.38004	4.34735	1.14986e-05
AT4G13770	1.23873	1.23877	7.86261	5.18025e-09
AT4G13800	3.4517	3.46691	2.52239	4.12665e-09
AT4G13810	0.900668	0.901093	3.8391	0.000882198
AT4G13830	1.38509	1.38539	4.70634	1.56269e-06
AT4G13840	1.60706	1.60728	5.46342	3.42349e-09
AT4G13930	0.767837	0.767846	9.07198	0.000433357
AT4G13990	0.832361	0.833106	3.08837	0.00203912
AT4G14020	1.08836	1.08867	4.83703	2.125e-07
AT4G14030	0.497668	0.497682	7.78843	0.00204496
AT4G14060	0.955344	0.95603	3.76055	0.00284468
AT4G14230	0.91248	0.912927	3.9089	1.44844e-05
AT4G14240	0.626652	0.626741	5.18173	0.0016903
AT4G14400	2.06402	2.06467	5.58943	1.13981e-05
AT4G14560	0.683378	0.683755	3.0859	0.00087761
AT4G14580	0.756282	0.756977	3.98849	0.0031238
AT4G14680	0.642375	0.642523	5.40502	0.000100079
AT4G14740	0.623351	0.623525	4.24708	0.000566769
AT4G14760	0.714395	0.714477	5.4694	0.000139716
AT4G15165	0.971792	0.975983	0.644107	0.00598768
AT4G15210	4.65264	4.70727	2.75979	1.03191e-06
AT4G15236	1.51168	1.52367	0.513334	0.0057396
AT4G15393	1.4449	1.44543	4.68254	3.78379e-07
AT4G15450	0.99512	0.996033	2.48246	7.38447e-05
AT4G15490	0.974668	0.974867	5.0535	6.73057e-05
AT4G15530	0.806854	0.806887	7.22648	9.83561e-05
AT4G15540	0.760046	0.760269	5.99879	8.44735e-06
AT4G15640	0.676551	0.676757	4.40907	0.000522439
AT4G15790	0.591009	0.591243	3.76423	0.00073046
AT4G15920	0.941692	0.941866	4.73793	5.76464e-05
AT4G16146	1.03267	1.03671	1.27137	0.000825793
AT4G16240	2.57782	2.63113	-0.687569	0.00119978
AT4G16370	0.653226	0.653242	7.31241	0.000698234
AT4G16590	7.0316	1.44269e+08	-1.41092	0.00487436
AT4G16620	0.931828	0.934145	1.62556	0.00153787
AT4G16630	0.61983	0.619909	5.4631	0.00591677
AT4G16807	1.01455	1.01754	0.924356	0.00389545
AT4G16860	1.85616	1.85679	4.33343	1.37866e-08
AT4G16880	2.6448	2.64816	2.32709	3.44625e-08
AT4G16950	0.938485	0.938568	5.92605	2.96715e-06
AT4G17470	1.14389	1.15084	0.41104	0.00887368
AT4G17570	0.424777	0.424872	4.77249	0.00910825
AT4G17670	1.35269	1.35363	3.55393	6.44427e-07
AT4G17695	0.664294	0.664904	2.64025	0.00883719
AT4G17770	1.47143	1.47166	5.57384	2.08482e-08
AT4G17830	0.623866	0.623966	5.37615	4.78182e-05
AT4G18030	0.507772	0.507794	7.0039	0.00282086
AT4G18040	0.452098	0.452146	5.70015	0.00676393
AT4G18220	0.58938	0.589679	3.62719	0.00328066
AT4G18270	1.25674	1.25904	2.10666	0.000943357
AT4G18280	1.33982	1.34121	2.54195	2.88067e-05
AT4G18390	0.967304	0.967515	4.6293	1.63971e-07
AT4G18425	0.965093	0.966676	2.14102	0.00902333
AT4G18440	1.00258	1.00277	5.04696	1.5881e-06
AT4G18630	0.661646	0.662104	3.40447	0.00895891
AT4G18910	0.563319	0.563601	3.58337	0.00455351
AT4G18970	1.02225	1.02235	5.51197	1.07889e-05
AT4G19120	0.804445	0.804539	5.75122	2.94018e-05
AT4G19170	2.1122	2.11238	6.1049	6.4393e-06
AT4G19420	1.0411	1.04127	5.00012	0.000117994
AT4G19430	3.87496	3.91189	0.0413744	4.6433e-07
AT4G19550	1.05826	1.06009	1.8168	0.00226208
AT4G19680	0.989889	0.992046	2.25988	0.00654917
AT4G20020	0.986108	0.986297	4.89246	2.15234e-05
AT4G20325	0.663646	0.664339	2.56907	0.00470782
AT4G20480	0.459335	0.459409	5.14839	0.00245459
AT4G20910	0.839503	0.8399	3.6315	0.000152787
AT4G21140	0.814199	0.81466	3.35843	9.17434e-05
AT4G21380	1.09391	1.09645	1.58395	0.00260456
AT4G21440	2.10341	2.11669	0.800774	0.000125103
AT4G21470	0.457985	0.458064	6.31769	0.00730628
AT4G21620	0.718421	0.718556	5.14689	0.000201108
AT4G21650	1.21979	1.22025	3.58838	0.000115599
AT4G21760	2.2736	2.27531	2.73995	1.73685e-07
AT4G21800	0.600595	0.600711	4.78998	0.000301194
AT4G21880	1.10823	1.10906	2.82597	0.000433395
AT4G21930	1.43779	1.44327	1.17311	7.08385e-05
AT4G21940	1.1498	1.15135	2.05038	0.000116474
AT4G22000	0.51923	0.519343	4.62704	0.00330626
AT4G22130	0.534294	0.534361	5.59101	0.00637357
AT4G22200	0.64244	0.642543	4.80997	0.000825326
AT4G22240	0.808483	0.808509	7.37211	8.72047e-05
AT4G22290	0.601695	0.601845	4.35186	0.000473674
AT4G22340	0.601619	0.60186	3.755	0.00124195
AT4G22380	0.812624	0.812895	4.15469	0.00039472
AT4G22470	1.29944	1.30331	1.09503	0.00173885
AT4G22610	1.87263	1.87951	1.70683	6.6198e-06
AT4G22840	0.645197	0.64567	2.71719	0.00718225
AT4G22880	3.55145	3.55493	4.80043	0.000146455
AT4G22920	0.466814	0.466918	4.79848	0.00615596
AT4G22990	0.891017	0.89186	2.58171	0.000398955
AT4G23000	0.785938	0.787369	4.90077	0.003448
AT4G23020	0.869025	0.870065	2.02656	0.00166858
AT4G23060	0.850508	0.850967	3.36249	0.000288983
AT4G23130	1.71163	1.71719	1.04856	0.000151668
AT4G23140	1.57631	1.58633	1.46258	0.000671889
AT4G23150	3.2501	3.34059	-0.303376	0.00369554
AT4G23170	1.35076	1.35242	2.76215	0.000753703
AT4G23200	1.30437	1.30655	1.73159	0.00428233
AT4G23250	1.40575	1.40626	4.29557	1.29996e-07
AT4G23320	3.45812	3.60819	-1.30623	0.00196233
AT4G23540	0.853664	0.853881	4.39558	0.000118614
AT4G23600	3.69513	3.69699	4.46636	1.73614e-08
AT4G23620	0.909308	0.909595	4.41847	1.82075e-06
AT4G23670	0.86338	0.863394	8.85137	0.000149463
AT4G23680	1.42784	1.42796	6.64504	9.217e-07
AT4G23885	0.658327	0.658624	4.17136	0.000603126
AT4G24000	7.29011	1.44269e+08	-0.00836885	0.00146971
AT4G24010	2.13767	2.15253	0.229995	0.00011797
AT4G24130	0.968822	0.969037	4.92774	0.000206922
AT4G24204	4.72727	1.44269e+08	-1.43697	0.00874489
AT4G24450	0.952293	0.952911	4.70291	0.000174393
AT4G24540	1.81595	1.81863	1.70131	3.13531e-05
AT4G24780	0.511517	0.51154	6.86613	0.000908833
AT4G24830	0.79918	0.799224	6.59278	7.32004e-05
AT4G25010	2.72116	2.74856	2.27908	0.000166905
AT4G25020	1.2642	1.26894	0.90745	0.00243413
AT4G25340	1.50707	1.50725	5.67804	7.87307e-08
AT4G25420	2.71932	2.73268	0.770055	4.75724e-07
AT4G25630	0.884674	0.884736	6.54961	0.000265985
AT4G25660	0.684074	0.684266	4.43666	0.000202872
AT4G25760	1.02288	1.0253	2.83496	0.0016427
AT4G26130	0.861001	0.861141	5.21148	5.89776e-05
AT4G26190	0.556395	0.556449	5.70511	0.00674337
AT4G26530	1.44892	1.44903	7.21211	4.19606e-05
AT4G26600	0.941035	0.941309	4.19286	3.5683e-06
AT4G26630	0.579807	0.579831	6.91495	0.00148644
AT4G26700	0.635552	0.635638	5.2872	0.000471092
AT4G26780	0.928043	0.92829	4.48824	2.68807e-05
AT4G26900	0.436084	0.436124	5.95942	0.00673769
AT4G27070	0.964013	0.964418	4.12129	1.68908e-05
AT4G27180	0.675943	0.67603	5.5441	1.21555e-05
AT4G27300	0.731625	0.731697	5.84691	0.00456492
AT4G27340	0.633369	0.633545	4.20073	0.00103246
AT4G27490	0.71193	0.712269	3.7028	0.00307933
AT4G27560	1.51068	1.5111	4.96334	9.20846e-06
AT4G27590	1.80681	1.81763	0.298059	0.00180007
AT4G27830	0.941932	0.942078	5.43698	1.80539e-06
AT4G27900	1.70441	1.70525	4.31166	3.19341e-08
AT4G28240	1.05218	1.05238	4.7765	7.77902e-07
AT4G28250	1.08341	1.08351	5.90346	1.8749e-05
AT4G28360	0.692489	0.692618	4.92098	0.000275549
AT4G28390	0.76558	0.765897	3.81955	0.00129596
AT4G28450	0.698359	0.698488	4.91371	0.00168008
AT4G28480	0.486204	0.486273	5.31037	0.00334445
AT4G28530	1.24927	1.25238	1.78894	0.000684979
AT4G28570	0.803892	0.80409	4.64094	3.01383e-06
AT4G28640	0.53393	0.534252	3.33397	0.00639441
AT4G28700	3.73076	3.78984	-0.610788	9.26134e-05
AT4G28790	1.21724	1.22155	0.785481	0.00140822
AT4G29020	0.837563	0.83761	6.52512	9.82947e-06
AT4G29070	0.915254	0.915411	4.93876	0.000322226
AT4G29190	1.71782	1.7187	4.2767	1.25217e-06
AT4G29390	0.495226	0.495258	6.40357	0.00492396
AT4G29510	1.17519	1.17541	5.0382	4.33864e-07
AT4G29520	0.676735	0.676947	4.49712	5.60164e-05
AT4G29530	0.826382	0.828065	1.81047	0.00336886
AT4G29700	0.850652	0.850831	5.11304	5.94947e-06
AT4G29930	0.988985	0.989702	2.97683	0.00207578
AT4G30020	0.585891	0.585961	5.63773	0.00099302
AT4G30110	1.22886	1.23015	3.16742	0.000138185
AT4G30220	0.686746	0.686871	4.96245	0.000254104
AT4G30290	0.680979	0.681126	5.65791	0.0012111
AT4G30530	0.932318	0.932355	7.67258	2.70798e-06
AT4G30800	1.08548	1.08609	3.42698	0.000324699
AT4G31210	0.717015	0.717097	5.45029	0.000123393
AT4G31330	1.45889	1.45977	4.09996	6.97303e-07
AT4G31450	0.554312	0.554427	4.71872	0.00077126
AT4G31500	0.636922	0.636945	7.75257	0.00186016
AT4G31580	0.616001	0.616065	5.81919	0.00017594
AT4G31590	0.480939	0.48099	5.81917	0.00592372
AT4G32420	0.546423	0.546477	5.74661	0.000668031
AT4G32480	0.580756	0.580948	5.9286	0.00342172
AT4G32520	0.526846	0.526887	6.13125	0.0032189
AT4G32770	0.728096	0.728163	5.6257	0.00742081
AT4G32880	0.567746	0.567839	5.17332	0.000664374
AT4G32920	1.30782	1.30801	5.42374	3.57016e-07
AT4G32940	0.66354	0.663564	7.58742	0.000138372
AT4G32950	1.64458	1.65441	-0.0296984	0.0005458
AT4G32980	1.00755	1.00792	4.24557	1.62458e-05
AT4G33040	0.738029	0.738438	4.01405	0.00633772
AT4G33080	0.454413	0.45445	6.09528	0.00236158
AT4G33110	0.543241	0.543286	5.72135	0.00414749
AT4G33140	0.662164	0.662419	4.09005	0.000106684
AT4G33220	0.776143	0.776223	5.62068	1.80267e-05
AT4G33467	2.67932	2.78541	-0.745915	0.00393628
AT4G33550	1.07967	1.08079	3.5369	0.000405733
AT4G33580	0.690766	0.690805	6.63769	0.000118552
AT4G33666	0.645174	0.645307	4.41424	0.00742843
AT4G33720	4.97116	4.98975	3.24983	1.29433e-07
AT4G33905	3.32585	3.34529	1.24091	3.57441e-06
AT4G33960	1.51509	1.51692	2.8596	9.52435e-06
AT4G33970	2.02233	2.04187	-0.00874121	0.00211425
AT4G34050	1.13636	1.13637	9.04443	2.38127e-07
AT4G34060	0.689293	0.690224	2.15267	0.00468907
AT4G34230	0.738281	0.738337	6.39888	9.59399e-05
AT4G34240	0.750086	0.750141	6.03572	5.17563e-06
AT4G34250	0.515133	0.515464	3.04685	0.00944423
AT4G34480	0.522618	0.522713	5.07666	0.00636243
AT4G34530	2.25596	2.25871	2.2924	1.42568e-05
AT4G34590	0.703545	0.703675	5.23823	0.000240006
AT4G34650	0.882686	0.883306	2.8315	0.00086771
AT4G34770	1.52532	1.53128	0.406436	0.00110925
AT4G34950	1.15553	1.15587	5.02279	1.34514e-06
AT4G35190	1.02936	1.03231	2.35756	0.00213769
AT4G35290	1.19238	1.1937	2.40843	0.000727871
AT4G35300	0.522745	0.522805	5.8268	0.00123165
AT4G35360	0.443176	0.443265	4.98272	0.00773134
AT4G35550	0.592067	0.592315	3.74657	0.00184243
AT4G35640	1.71737	1.71945	3.32534	1.14352e-05
AT4G35880	0.673709	0.674032	3.70729	0.000686414
AT4G36010	1.27454	1.27634	2.48682	2.16517e-05
AT4G36040	0.566426	0.566471	6.2425	0.00327067
AT4G36240	0.964763	0.965311	3.23259	1.64941e-05
AT4G36250	0.893747	0.893809	6.31476	1.38992e-06
AT4G36360	0.678478	0.678504	7.07601	0.00167324
AT4G36420	0.557597	0.557707	5.01367	0.000708939
AT4G36430	1.52452	1.52523	4.68542	1.01134e-05
AT4G36570	0.849021	0.850002	3.4966	0.00199729
AT4G36700	4.31702	4.43588	-0.879713	3.20008e-05
AT4G36830	1.41772	1.42119	1.61994	0.00050033
AT4G36900	1.07844	1.0796	2.59985	2.58747e-05
AT4G37000	1.09163	1.09187	4.82125	7.01622e-06
AT4G37090	0.63548	0.635683	4.21005	0.00091358
AT4G37190	0.517844	0.518062	3.75707	0.00474377
AT4G37670	0.595181	0.595586	3.15958	0.00596562
AT4G37970	0.860191	0.862944	1.27008	0.0059882
AT4G37980	0.787714	0.787796	5.6577	0.000515832
AT4G38340	0.996763	0.999683	0.967509	0.00901372
AT4G38580	0.799501	0.800158	3.19959	0.000360321
AT4G38860	1.55157	1.55198	4.35051	3.11242e-07
AT4G38890	1.03525	1.0354	5.38359	2.06826e-05
AT4G38950	0.848933	0.849006	5.916	1.40267e-05
AT4G39030	0.78314	0.783395	4.48811	0.00159874
AT4G39160	0.473137	0.473266	4.3613	0.007084
AT4G39210	3.69673	3.69793	5.48918	1.01026e-10
AT4G39250	2.30999	2.32381	0.485498	0.000758203
AT4G39260	0.991479	0.991514	8.15839	2.89712e-06
AT4G39280	0.545471	0.545523	5.82034	0.000421303
AT4G39330	1.22786	1.2279	7.32509	1.08439e-06
AT4G39350	0.809138	0.809168	7.19123	3.23171e-06
AT4G39470	0.536274	0.536536	3.45965	0.00742487
AT4G39480	2.41942	2.42904	1.12445	6.8041e-05
AT4G39510	1.014	1.01432	4.06032	3.58088e-06
AT4G39540	0.683407	0.683495	5.42488	8.85619e-06
AT4G39730	0.714325	0.714375	6.80162	0.000862962
AT4G39780	0.628823	0.629008	4.01263	0.00532008
AT4G39800	1.96693	1.96696	8.42079	6.26718e-09
AT4G39940	0.856382	0.85644	6.93985	5.26683e-05
AT4G39955	0.833961	0.834239	4.49824	2.13636e-06
AT4G39980	1.44046	1.44056	6.52764	5.74167e-06
AT4G40000	0.685278	0.685998	2.66591	0.0070499
AT5G01210	0.538072	0.538191	4.64644	0.00333231
AT5G01270	0.740681	0.740797	5.14755	2.35668e-05
AT5G01300	3.23934	3.3297	-1.15566	0.00270606
AT5G01410	0.689735	0.689744	8.59179	0.0046353
AT5G01445	1.0574	1.06163	0.712919	0.00569997
AT5G01500	0.751836	0.752062	4.49221	1.6998e-05
AT5G01520	0.770587	0.771016	3.39113	0.00125114
AT5G01770	0.769382	0.769721	3.772	0.00399685
AT5G01780	0.495155	0.495379	3.78257	0.00888348
AT5G01790	1.19281	1.19365	3.21335	5.25206e-06
AT5G01820	1.103	1.10309	7.01683	1.89686e-07
AT5G01880	0.757429	0.758144	2.7997	0.00290405
AT5G02030	0.905067	0.905605	3.37831	0.000119787
AT5G02050	0.791732	0.791841	5.55574	0.00109491
AT5G02180	1.43652	1.43746	3.54968	4.11978e-08
AT5G02230	0.932599	0.932823	4.60323	1.42327e-05
AT5G02430	1.09935	1.10079	2.19292	0.000597746
AT5G02470	0.531295	0.531622	3.24401	0.00962545
AT5G02490	2.11015	2.11046	5.53863	1.25145e-10
AT5G02590	1.06659	1.06703	3.72902	1.68887e-06
AT5G02620	0.994308	0.994645	4.27411	7.99513e-05
AT5G02760	1.38148	1.38205	3.60817	4.89562e-05
AT5G02810	1.83979	1.84018	4.73913	0.000273354
AT5G02890	1.09652	1.09738	3.05717	6.80124e-05
AT5G03160	0.594782	0.594879	5.29227	0.000274611
AT5G03210	3.92162	3.93473	2.91825	2.98731e-07
AT5G03300	0.647831	0.647856	7.28747	0.000178444
AT5G03350	1.68465	1.68598	4.08089	0.00022173
AT5G03370	0.634276	0.634583	3.74399	0.00318576
AT5G03495	1.67327	1.67913	1.30983	0.00022806
AT5G03545	1.36068	1.36148	9.47784	2.28747e-05
AT5G03650	0.591204	0.591235	6.56782	0.000415236
AT5G03660	0.474267	0.474326	5.71288	0.00455428
AT5G03740	0.48319	0.483242	5.7702	0.0030487
AT5G03760	0.785012	0.785054	6.65617	2.52125e-05
AT5G03850	0.634986	0.635023	6.62072	0.00215062
AT5G04080	0.852056	0.852569	3.8649	0.00016521
AT5G04120	1.05722	1.05766	4.48721	0.00205959
AT5G04130	0.603738	0.603825	5.21942	0.000604544
AT5G04160	0.759094	0.759357	4.11649	8.65633e-05
AT5G04280	0.627476	0.627572	5.14115	0.000371358
AT5G04380	5.78059	1.44269e+08	-1.36268	0.00554364
AT5G04895	0.70884	0.709247	3.59888	0.00539365
AT5G04950	0.789049	0.789094	6.09113	7.34054e-05
AT5G05090	1.10767	1.11041	1.38494	0.00382793
AT5G05200	0.487977	0.48801	6.30561	0.00482659
AT5G05250	1.10871	1.109	3.80423	0.000706865
AT5G05270	1.87561	1.87572	7.01572	0.000521172
AT5G05340	1.77651	1.78961	1.93477	0.00223998
AT5G05390	1.8815	1.89297	0.56089	0.00105628
AT5G05580	0.656615	0.656656	6.24235	0.000227013
AT5G05830	0.7009	0.70137	3.10388	0.000576649
AT5G05840	2.30534	2.32332	1.39053	0.000103646
AT5G05920	0.642296	0.642704	3.52437	0.000888958
AT5G05960	0.669075	0.669158	5.79669	0.00102631
AT5G05990	0.942332	0.94282	3.37039	2.15718e-05
AT5G06190	1.3357	1.34268	0.530035	0.00291478
AT5G06480	1.75673	1.76893	0.0397814	0.000753904
AT5G06510	2.29254	2.29532	3.36751	1.80136e-07
AT5G06550	0.773648	0.773973	3.88799	0.00356478
AT5G06720	1.54236	1.54815	1.09711	0.000261894
AT5G06760	4.19296	4.20115	2.90133	1.65923e-07
AT5G07190	1.95067	1.96739	1.05594	0.000808684
AT5G07460	0.825097	0.82525	5.17155	1.81818e-05
AT5G07560	1.6485	1.66387	-0.47287	0.00366326
AT5G07580	0.718573	0.718713	4.73842	0.0010153
AT5G07660	0.875355	0.877017	1.70797	0.00767404
AT5G07670	0.553769	0.554044	3.56541	0.0035486
AT5G07690	1.78584	1.7867	3.48349	9.27815e-07
AT5G07790	0.954349	0.955637	2.22912	0.000302795
AT5G07800	0.769675	0.770757	1.89822	0.00930775
AT5G07990	1.47757	1.478	5.5767	0.00619085
AT5G08030	1.40942	1.41503	3.69164	0.00108549
AT5G08040	0.718507	0.718651	4.80608	0.000401412
AT5G08170	0.721507	0.721639	4.97766	3.18898e-05
AT5G08180	0.908734	0.908806	6.16741	0.000127618
AT5G08420	0.463187	0.463226	5.91857	0.0033843
AT5G08600	1.05597	1.05689	2.72338	4.63562e-05
AT5G08640	1.72749	1.72757	7.52171	0.00189473
AT5G08760	2.13935	2.14183	2.35157	1.28279e-07
AT5G09250	0.808289	0.808695	3.59252	4.4878e-05
AT5G09420	0.622261	0.622622	3.5347	0.00284304
AT5G09570	1.04193	1.04648	4.47242	0.00548545
AT5G09590	0.940516	0.940561	6.9625	2.89651e-05
AT5G09620	0.606808	0.606865	5.98168	0.000392265
AT5G09810	0.688501	0.68851	8.77848	4.34676e-05
AT5G09860	0.473791	0.473882	4.85165	0.00604672
AT5G09870	0.670938	0.670959	7.34958	0.0019111
AT5G09930	0.734111	0.73517	1.54766	0.00933816
AT5G09990	1.32103	1.32435	1.05866	0.000167388
AT5G10070	0.745216	0.74549	3.9895	3.04008e-05
AT5G10210	1.04642	1.04842	1.26664	0.00273528
AT5G10230	0.825237	0.825643	3.09477	0.00356537
AT5G10240	0.613181	0.61327	5.31162	0.000676494
AT5G10400	0.500591	0.500673	5.16253	0.00594233
AT5G10760	4.00896	4.04122	2.38686	9.21933e-08
AT5G10770	0.786279	0.786365	6.34621	1.30329e-05
AT5G10910	0.571968	0.57216	3.90902	0.00218828
AT5G10950	0.477466	0.477582	4.50202	0.00408001
AT5G11060	1.99003	1.9908	4.087	1.63445e-10
AT5G11240	0.884952	0.885123	4.87237	0.00051852
AT5G11610	2.28776	2.29503	1.09035	1.13155e-05
AT5G11750	0.715065	0.715505	3.24114	0.00120561
AT5G11790	1.68729	1.68744	6.22707	1.11662e-08
AT5G11930	2.31845	2.33104	1.85803	3.53713e-06
AT5G11950	0.917533	0.917708	4.9961	8.13742e-06
AT5G12020	4.9306	4.95238	1.71284	1.38607e-07
AT5G12030	3.1875	3.2029	0.826053	2.47635e-05
AT5G12080	1.2647	1.26498	4.81806	1.22159e-06
AT5G12110	2.01392	2.01422	5.18745	1.38997e-07
AT5G12220	0.745988	0.746321	3.66952	0.000868758
AT5G13170	4.57164	4.57796	3.6371	9.95784e-08
AT5G13400	0.636359	0.636499	4.5128	0.000551118
AT5G13550	0.964072	0.964207	5.84534	3.92226e-06
AT5G13610	0.635334	0.635658	3.42647	0.00136264
AT5G13740	1.25543	1.25557	5.46839	4.662e-09
AT5G13800	0.483086	0.483146	5.54399	0.00358186
AT5G13830	1.492	1.49666	1.21766	0.000109321
AT5G13930	1.15546	1.15547	9.83405	0.00108976
AT5G13950	0.529726	0.529802	5.28611	0.0034745
AT5G14050	0.599205	0.599267	5.65274	0.00173384
AT5G14200	0.964856	0.964888	7.985	2.15262e-07
AT5G14550	0.469393	0.469552	4.17387	0.00855248
AT5G14580	0.863033	0.863365	4.06266	0.00715842
AT5G14600	0.850632	0.851174	3.16924	0.00258796
AT5G14640	0.574704	0.57475	6.3814	0.000157873
AT5G14650	1.56311	1.56429	2.96874	4.80416e-06
AT5G14940	0.889939	0.890745	2.82205	0.0012516
AT5G14970	0.63536	0.635412	5.95881	0.00396644
AT5G15160	1.84079	1.8456	1.39904	0.000142813
AT5G15450	1.01464	1.01467	7.52383	3.81873e-06
AT5G15500	8.76637	9.21088	1.93647	7.86222e-09
AT5G15520	0.534963	0.535152	4.15178	0.00809528
AT5G15550	0.910346	0.91051	5.13087	2.96414e-05
AT5G15700	0.939522	0.939936	3.84759	0.000248667
AT5G15750	0.650375	0.650535	4.56144	0.0024475
AT5G15800	2.09281	2.10418	0.178299	0.000433972
AT5G15960	3.42146	3.42811	2.79467	1.63777e-08
AT5G15970	1.7521	1.75237	5.78043	1.28092e-06
AT5G16040	0.741953	0.742334	3.55827	0.00108457
AT5G16450	0.532535	0.532724	4.08901	0.0085288
AT5G16530	0.80973	0.810592	2.99866	0.00563206
AT5G16570	1.62772	1.62971	2.32967	4.16968e-05
AT5G16750	0.658142	0.658245	5.2857	0.00191587
AT5G16930	0.863681	0.863989	4.12207	0.00289321
AT5G16990	0.51855	0.518702	4.35326	0.00263219
AT5G17010	1.41095	1.41112	5.92458	0.000132025
AT5G17220	2.44933	2.45184	4.62895	0.000367119
AT5G17270	0.756376	0.756576	4.49329	0.000800256
AT5G17700	0.99337	0.994007	3.6503	8.1373e-05
AT5G17760	0.551009	0.551216	4.80682	0.0053011
AT5G17860	1.28337	1.28397	4.84977	9.85093e-07
AT5G17920	0.904402	0.904404	11.3632	6.30593e-05
AT5G18040	0.577669	0.578013	3.10222	0.00422787
AT5G18440	0.87878	0.879184	3.52108	8.15052e-05
AT5G18550	1.08138	1.08188	4.18469	7.05518e-06
AT5G18760	0.600779	0.60106	3.52658	0.00294719
AT5G18820	1.01167	1.01238	2.9814	0.0030079
AT5G18840	1.88275	1.8852	2.76594	1.09263e-06
AT5G18920	0.821803	0.823387	1.73436	0.00357092
AT5G19140	0.878584	0.878631	7.20462	0.00299184
AT5G19190	0.605554	0.605614	5.4319	0.00805116
AT5G19300	0.760324	0.760701	3.67196	0.00145113
AT5G19470	9.52222	1.44269e+08	0.95989	9.00255e-05
AT5G19540	0.892893	0.893002	5.63387	3.70698e-07
AT5G19890	2.10369	2.10868	2.2951	0.000123838
AT5G19920	0.562351	0.562644	3.41292	0.00228356
AT5G20120	0.497877	0.498119	3.62678	0.00482627
AT5G20160	0.696436	0.696497	5.90569	0.000934517
AT5G20180	0.688557	0.68875	4.34538	0.000364752
AT5G20190	0.560003	0.560026	7.15803	0.00892865
AT5G20240	1.38828	1.40165	-0.208168	0.00488414
AT5G20280	0.5558	0.555825	7.6659	0.00114372
AT5G20670	0.979708	0.981178	1.73238	0.00195679
AT5G20700	0.755554	0.755566	8.8004	2.77063e-05
AT5G21100	0.664184	0.664235	5.98071	0.00037097
AT5G22020	1.1365	1.13662	6.0788	0.00110255
AT5G22060	0.508088	0.50811	6.97825	0.00334644
AT5G22100	0.942809	0.943091	4.21893	8.35191e-06
AT5G22110	0.754499	0.755188	2.57461	0.00130005
AT5G22220	0.926237	0.927175	2.68007	0.000844767
AT5G22270	2.08599	2.09184	1.75216	2.49233e-06
AT5G22300	1.94469	1.9451	4.7998	4.6464e-08
AT5G22320	0.569104	0.569259	4.24526	0.00176524
AT5G22330	0.51094	0.511022	5.06764	0.00291227
AT5G22460	1.77748	1.78099	1.50028	2.06213e-05
AT5G22500	1.0664	1.06686	4.42965	5.35929e-05
AT5G22580	1.37606	1.37669	3.46553	5.53995e-05
AT5G22650	0.733166	0.733188	7.56784	0.000119697
AT5G22920	0.829502	0.82971	4.17167	0.00113328
AT5G22930	1.25086	1.25326	1.8832	0.000323831
AT5G23000	1.52269	1.53076	0.415096	0.00256107
AT5G23010	0.723628	0.723662	7.57245	0.000325986
AT5G23020	0.913712	0.913759	7.86669	1.01809e-06
AT5G23070	0.716382	0.716575	4.1842	7.61116e-05
AT5G23300	0.646673	0.646857	4.52764	0.000954126
AT5G23360	0.903518	0.905202	1.47166	0.00368521
AT5G23370	1.11875	1.1219	1.00272	0.00128409
AT5G23480	0.77638	0.77746	2.01606	0.00336864
AT5G23535	0.536904	0.537041	4.74802	0.00389348
AT5G23580	0.747842	0.748099	4.13151	8.75218e-06
AT5G23750	0.723227	0.723442	4.30902	0.000227469
AT5G23810	1.20159	1.20498	1.64997	0.00030504
AT5G24080	3.12544	3.16685	0.0907597	7.03861e-05
AT5G24150	1.63212	1.63221	6.70124	8.03906e-05
AT5G24155	1.90131	1.9058	1.57885	0.000998802
AT5G24160	1.49235	1.49285	4.46486	4.9374e-06
AT5G24200	2.29115	2.30645	1.1839	0.00155253
AT5G24210	0.940893	0.941079	5.24941	0.000459525
AT5G24300	0.508256	0.508292	6.25427	0.00135228
AT5G24310	0.655922	0.656428	3.2093	0.00578843
AT5G24600	1.001	1.00621	2.72381	0.00381134
AT5G24655	1.27052	1.27536	2.67025	0.000639331
AT5G24660	1.34645	1.34673	5.84835	1.14641e-06
AT5G24760	0.76012	0.760277	5.02986	0.000366558
AT5G24770	4.07719	4.08409	3.66924	6.99983e-11
AT5G24780	1.44403	1.44515	3.05886	0.000313157
AT5G24810	0.750093	0.750139	6.39266	0.000558078
AT5G24990	0.862725	0.863849	2.34151	0.0044856
AT5G25130	1.69277	1.69411	2.71484	3.63691e-05
AT5G25140	0.882055	0.882379	3.49817	0.000110707
AT5G25190	2.92013	2.92615	1.89846	2.10155e-09
AT5G25220	0.631958	0.632022	5.81479	3.28824e-05
AT5G25280	0.716163	0.716223	6.02377	0.000482987
AT5G25450	1.09317	1.09578	1.40142	0.000888362
AT5G25610	1.81161	1.81167	7.91651	3.68196e-09
AT5G25630	0.494549	0.494582	6.24467	0.00632572
AT5G26110	0.609081	0.609286	4.14445	0.000946174
AT5G26220	3.32929	3.33302	4.7633	1.26144e-06
AT5G26667	0.438725	0.438766	6.22907	0.00572678
AT5G26780	0.521858	0.521903	6.11028	0.00205679
AT5G26830	0.518033	0.518059	6.74457	0.00412726
AT5G26860	0.617009	0.617086	5.59064	0.00745877
AT5G27030	0.762674	0.762814	4.83799	7.48742e-05
AT5G27120	0.941513	0.941568	6.5748	0.000168814
AT5G27280	0.610304	0.610785	3.4115	0.00463019
AT5G27330	1.00539	1.00559	5.14354	0.000854557
AT5G27930	0.819649	0.820083	3.59697	0.00024825
AT5G28030	1.1426	1.14409	1.93614	0.000322231
AT5G28510	2.58093	2.63426	-0.426648	0.000174495
AT5G28540	0.598177	0.59819	8.21202	0.00189211
AT5G28910	1.12888	1.13201	1.22559	0.00848296
AT5G35400	0.698077	0.698691	2.64454	0.000808698
AT5G35480	2.43864	2.44331	1.53512	9.07633e-06
AT5G35490	0.941932	0.94337	1.57919	0.00683681
AT5G35680	0.520174	0.520219	6.11891	0.00129554
AT5G35732	0.912403	0.913272	2.81717	0.000439666
AT5G36130	2.74503	2.77252	0.997779	2.88305e-05
AT5G36140	3.57638	3.6001	1.88834	1.56132e-05
AT5G36150	1.96152	1.97289	0.597097	0.00268141
AT5G36160	0.717153	0.717197	6.47267	3.07863e-05
AT5G36740	0.772654	0.773752	2.07764	0.00609917
AT5G36907	3.39633	3.54571	-0.996906	0.0012026
AT5G36920	1.2782	1.28694	-0.196355	0.00648802
AT5G37300	2.82099	2.8341	0.58894	2.93905e-05
AT5G37360	0.463806	0.463856	5.51209	0.00870393
AT5G37440	1.97811	1.98781	0.799498	0.000120144
AT5G37600	0.465191	0.465208	7.85602	0.00771148
AT5G37720	0.496008	0.496089	5.13169	0.00247238
AT5G37980	3.06074	3.08146	0.548257	3.9425e-07
AT5G37990	1.24593	1.24603	6.02479	0.000615911
AT5G38000	2.71915	2.72401	2.59297	7.35286e-08
AT5G38020	1.60793	1.60832	4.77282	9.86446e-06
AT5G38030	0.669305	0.66949	4.38601	0.00314241
AT5G38060	0.936399	0.937815	1.90432	0.00245423
AT5G38530	0.66714	0.667207	6.05366	0.000108688
AT5G38700	1.67572	1.68944	0.566277	0.00188519
AT5G38720	0.626582	0.626782	4.02598	0.000314833
AT5G38780	1.10836	1.11075	1.44572	0.00495273
AT5G39520	3.55237	3.58606	0.129093	2.76992e-05
AT5G39610	1.48742	1.4894	2.37379	2.45038e-06
AT5G39790	1.01564	1.01664	2.72508	0.000170824
AT5G39800	0.697517	0.698349	2.50468	0.00309514
AT5G39850	0.875301	0.875607	4.14937	2.9133e-05
AT5G39890	1.12715	1.12959	2.3431	0.000836016
AT5G40080	0.746812	0.747673	2.46008	0.00351293
AT5G40270	0.653117	0.653412	3.92558	0.000651501
AT5G40370	0.682225	0.682292	6.3297	0.000413049
AT5G40480	0.688014	0.688108	5.45937	0.0082203
AT5G40490	0.6134	0.613536	4.63178	0.00238381
AT5G40500	1.39311	1.39403	2.87855	8.22887e-07
AT5G40640	0.560832	0.561131	3.5858	0.00657174
AT5G40670	0.718774	0.718868	5.74709	0.000169522
AT5G40760	0.594535	0.594586	6.21429	0.00205632
AT5G40800	3.15407	3.20463	-0.200181	0.000306756
AT5G40960	0.784194	0.786734	1.22394	0.00919468
AT5G41140	1.01022	1.01037	5.07391	6.9191e-07
AT5G41360	0.688153	0.688356	4.27998	4.04081e-05
AT5G41380	2.28243	2.30116	0.646257	1.46928e-05
AT5G41410	0.84169	0.84193	4.24302	0.000109942
AT5G41460	1.45958	1.46061	3.19044	9.38418e-08
AT5G41670	0.708199	0.708232	6.9385	0.000268465
AT5G41880	0.769073	0.769485	3.36864	0.000997599
AT5G41900	2.06322	2.06679	1.90192	3.75331e-06
AT5G42020	0.626375	0.62639	8.28382	0.00268717
AT5G42150	0.545744	0.545847	4.97488	0.00151065
AT5G42300	0.475308	0.475334	6.92838	0.00578506
AT5G42530	3.38183	3.38234	6.46523	1.08334e-07
AT5G42580	0.922512	0.923852	2.13798	0.00697176
AT5G42650	0.638356	0.638414	6.44024	0.00598629
AT5G42670	0.626942	0.627167	3.82989	0.00106018
AT5G42720	0.507609	0.507686	5.3256	0.00614773
AT5G42800	3.75243	3.75636	5.31209	4.7599e-05
AT5G43150	1.36317	1.36341	6.12001	2.13439e-08
AT5G43290	2.34376	2.35921	0.0220864	0.000189645
AT5G43440	1.34253	1.34578	1.53231	3.57575e-05
AT5G43745	0.727719	0.727862	4.72947	0.000103741
AT5G43850	1.06379	1.06387	6.1696	7.64244e-06
AT5G43990	0.766735	0.767441	2.79072	0.00468681
AT5G44005	1.21784	1.22142	2.79701	1.43004e-05
AT5G44190	0.623117	0.623141	6.85148	0.00725721
AT5G44400	2.73053	2.73215	3.99171	6.48818e-12
AT5G44420	5.79158	5.85425	1.175	2.16471e-06
AT5G44430	8.53844	1.44269e+08	-0.479813	0.000586879
AT5G44565	1.39966	1.41043	0.786406	0.00171357
AT5G44572	1.08182	1.08295	2.23756	0.00274162
AT5G44575	1.0158	1.01764	1.28972	0.00686087
AT5G44580	1.38739	1.38748	6.48539	3.61251e-06
AT5G44635	1.00103	1.00141	3.85872	9.8198e-05
AT5G44680	1.2855	1.2858	4.39617	7.72032e-06
AT5G44780	0.803461	0.804012	2.97032	0.00388627
AT5G44820	0.80542	0.806391	3.22135	0.00907883
AT5G45650	2.26054	2.26136	3.97019	1.42734e-07
AT5G45820	1.34494	1.34548	3.33197	0.000365193
AT5G45850	1.24226	1.24736	0.519215	0.00235414
AT5G45950	1.41532	1.41554	5.29875	1.59841e-06
AT5G45960	1.13878	1.14221	0.676983	0.00114184
AT5G46100	1.09966	1.10155	1.80662	0.000224185
AT5G46280	0.611693	0.611821	4.70113	0.00217927
AT5G46590	1.68909	1.69498	1.04139	7.04322e-05
AT5G46690	0.957338	0.957942	2.98646	0.000444555
AT5G46710	0.927909	0.929298	2.30791	0.00310033
AT5G46730	1.93379	1.93478	3.56296	5.43001e-09
AT5G46830	5.06528	5.2985	-0.788962	1.32383e-05
AT5G46920	0.64046	0.640785	3.62184	0.000888802
AT5G47000	2.25575	2.26117	1.87164	5.75329e-08
AT5G47240	1.20459	1.20658	2.33427	0.00524084
AT5G47330	2.4663	2.48399	0.201946	0.000541073
AT5G47370	0.957255	0.957497	4.4968	1.15017e-06
AT5G47390	0.537772	0.537888	4.83555	0.00220066
AT5G47630	0.748067	0.748517	3.19143	0.00240601
AT5G47640	0.795809	0.795907	5.54703	0.00192361
AT5G47650	0.588648	0.588843	4.02054	0.000764801
AT5G47870	0.849021	0.849126	5.48947	0.00202495
AT5G47880	0.431547	0.431585	6.02435	0.00548395
AT5G47980	1.26109	1.26212	2.83857	0.000654497
AT5G48000	0.703813	0.703902	5.49485	0.00221808
AT5G48010	1.26899	1.26912	6.01562	1.38091e-06
AT5G48030	0.743207	0.743298	5.44946	0.000103615
AT5G48070	1.13554	1.13677	3.64745	1.9469e-05
AT5G48180	1.08252	1.08256	7.51242	1.81837e-05
AT5G48330	0.558277	0.558655	3.33323	0.0059572
AT5G48370	0.479645	0.480014	3.41397	0.00933857
AT5G48570	3.26029	3.26126	4.62247	1.67831e-10
AT5G48600	0.595437	0.595597	4.27718	0.00680916
AT5G48850	3.40352	3.40467	6.30079	1.38763e-08
AT5G48880	2.75068	2.75109	6.1365	0.00011194
AT5G48930	0.639814	0.63983	7.79064	5.88101e-05
AT5G49630	1.16132	1.16179	4.52616	2.57523e-05
AT5G49740	0.889183	0.889256	6.17101	0.00102637
AT5G49850	1.19591	1.1994	2.45571	7.55422e-05
AT5G49910	1.05209	1.0521	8.43196	1.81062e-06
AT5G50130	1.04143	1.04299	2.12885	0.00427704
AT5G50160	1.1634	1.16379	4.58102	5.03378e-06
AT5G50240	0.811796	0.812487	2.97725	0.00119276
AT5G50260	0.967139	0.969371	2.57636	0.00702152
AT5G50360	3.53171	3.59824	-0.288006	4.28495e-06
AT5G50370	0.636993	0.637131	4.83692	0.00148156
AT5G50410	0.577127	0.577427	3.48692	0.00838683
AT5G50790	2.23649	2.24818	1.04162	2.60612e-05
AT5G50800	2.08618	2.08953	3.47243	1.98746e-05
[truncated: 2,113 more rows]

## Sheet: Supplementary Table 6
Differentially expressed genes in LPi+Phi treatment relative to LPi.
DEGs of LPi_Phi VS Lpi
ID	logFC	unshrunk.logFC	logCPM	PValue
AT1G01010	0.585227	0.585369	4.38395	0.0015904
AT1G01060	1.14396	1.14397	9.39323	1.21998e-05
AT1G01080	1.10327	1.10348	5.45091	2.3022e-05
AT1G01170	1.37364	1.37401	4.96442	0.000280295
AT1G01210	0.641769	0.642146	3.57763	0.000942571
AT1G01290	0.61159	0.611865	3.75795	0.00121326
AT1G01320	1.92739	1.92744	8.66645	5.67298e-10
AT1G01390	1.30665	1.30825	2.40579	0.000179433
AT1G01430	0.722507	0.722597	5.9713	1.58299e-05
AT1G01450	0.91836	0.919031	3.03079	4.40528e-05
AT1G01490	0.552026	0.552068	6.60051	0.000800921
AT1G01520	1.02461	1.02485	4.99692	0.000911892
AT1G01715	1.10104	1.10304	1.75005	0.000736079
AT1G01740	0.649611	0.650263	2.69357	0.0182297
AT1G01770	0.569837	0.570047	4.169	0.0118916
AT1G01790	0.943943	0.943982	7.34884	2.75401e-06
AT1G01800	0.436018	0.436056	6.07114	0.0211744
AT1G01860	0.664836	0.665404	3.09406	0.00124331
AT1G01920	0.915851	0.916124	4.24449	2.20812e-05
AT1G01970	0.632132	0.632317	4.85656	0.00163059
AT1G01990	1.07095	1.07127	4.49959	2.27966e-06
AT1G02050	1.40645	1.40753	2.94704	9.92928e-07
AT1G02060	1.4904	1.49135	3.27961	3.06755e-06
AT1G02100	1.03307	1.03318	5.64664	1.65826e-08
AT1G02110	1.24293	1.24324	4.82949	1.38401e-05
AT1G02150	1.30466	1.30479	6.52837	3.00573e-07
AT1G02280	1.96446	1.96471	6.40943	1.44976e-09
AT1G02300	0.824966	0.825923	2.41807	0.0177331
AT1G02475	1.16577	1.16599	5.34799	1.37858e-06
AT1G02560	0.793383	0.793418	7.53062	4.3826e-05
AT1G02620	5.38863	1.44269e+08	-1.46763	0.00501726
AT1G02650	0.95096	0.955134	1.11084	0.0146553
AT1G02840	0.949768	0.949809	7.12193	3.03144e-07
AT1G02850	1.39971	1.39977	6.71584	2.05458e-06
AT1G02860	0.60774	0.608078	3.62984	0.00302542
AT1G02870	0.870025	0.870293	4.43769	0.000127934
AT1G02910	0.945846	0.945989	5.62564	4.28743e-06
AT1G02930	0.815767	0.815786	7.76221	0.0179278
AT1G02960	0.488026	0.488182	4.08618	0.0113328
AT1G03055	0.756403	0.75754	2.67633	0.00331426
AT1G03090	0.883774	0.883922	5.45216	0.000270038
AT1G03160	1.04377	1.04395	5.40614	5.66136e-07
AT1G03400	1.6344	1.63544	3.82871	6.99779e-06
AT1G03475	0.819813	0.819867	6.86851	5.0536e-05
AT1G03510	1.11106	1.11602	0.620018	0.00294584
AT1G03530	0.658925	0.659135	4.48532	0.00125132
AT1G03600	1.47496	1.47501	8.10103	1.90279e-05
AT1G03610	0.548994	0.549128	4.71199	0.006814
AT1G03650	1.51658	1.52057	1.43789	9.97362e-06
AT1G03680	1.10326	1.10332	7.08869	4.25349e-05
AT1G03687	0.674068	0.674396	3.79677	0.000869861
AT1G03760	1.50525	1.50624	3.29686	8.99149e-07
AT1G03770	0.944302	0.944989	2.99237	0.000422403
AT1G03800	0.982136	0.986041	0.876093	0.0104983
AT1G03930	0.531055	0.531157	5.21764	0.000324443
AT1G03960	0.482325	0.482633	3.13504	0.0156413
AT1G04110	0.93074	0.931791	2.96103	0.00393797
AT1G04350	1.06116	1.06128	6.1019	0.000211831
AT1G04420	1.48197	1.48215	6.39584	3.34331e-07
AT1G04530	0.631033	0.631117	6.3079	0.00132567
AT1G04620	0.921203	0.921542	4.20727	0.000162963
AT1G04640	1.62933	1.62989	4.68802	1.85015e-09
AT1G04710	0.606989	0.607213	4.2814	0.00184388
AT1G04770	1.54065	1.54085	5.66582	1.82066e-09
AT1G04860	0.531209	0.531293	5.37345	0.000787709
AT1G04870	0.484471	0.48454	5.51304	0.0139482
AT1G04880	2.03038	2.05589	0.0609105	0.00491415
AT1G04940	0.76748	0.767645	5.34244	3.59388e-05
AT1G04985	0.732082	0.732318	4.5302	8.28124e-05
AT1G05140	0.782613	0.782718	5.7509	7.30672e-05
AT1G05160	0.511379	0.511675	3.31407	0.0206993
AT1G05180	0.486443	0.486517	5.24881	0.00115698
AT1G05190	1.37077	1.37081	8.17213	8.87421e-06
AT1G05200	0.488289	0.488376	5.20456	0.00482873
AT1G05230	0.774461	0.774722	4.40094	1.21272e-05
AT1G05385	1.53279	1.53368	3.95138	3.52842e-06
AT1G05410	0.645735	0.645975	4.18985	0.000216577
AT1G05430	0.45632	0.456451	4.56632	0.0135806
AT1G05560	0.564683	0.564731	6.12492	0.00448564
AT1G05600	1.02727	1.02817	2.83439	4.40715e-05
AT1G05675	1.30485	1.30727	1.80049	0.00191253
AT1G05680	1.54775	1.54787	6.03071	7.01286e-05
AT1G05730	0.885962	0.888825	0.894411	0.0113624
AT1G05750	0.778469	0.77929	2.4394	0.0028286
AT1G05820	0.85752	0.859574	1.6558	0.00449608
AT1G05830	0.675068	0.675166	5.41429	0.0011499
AT1G05890	0.915516	0.915578	6.39919	2.42257e-07
AT1G05900	0.501333	0.501484	4.48282	0.00817178
AT1G05970	0.828421	0.829334	2.52845	0.00569227
AT1G06110	0.537736	0.537815	5.31194	0.00019165
AT1G06130	0.645729	0.645867	4.85905	3.68478e-05
AT1G06150	0.481806	0.481904	5.2516	0.00504166
AT1G06160	1.81205	1.81803	1.03849	0.000748169
AT1G06180	0.842765	0.842913	5.04389	0.000342334
AT1G06190	1.00619	1.00633	5.97626	6.57966e-07
AT1G06240	0.996437	0.996893	3.97056	0.000115289
AT1G06250	1.49667	1.49941	1.60665	0.000198137
AT1G06260	2.29043	2.29531	1.60322	3.9418e-06
AT1G06380	0.509985	0.510261	3.56681	0.0075514
AT1G06390	0.622116	0.622167	6.29349	3.00221e-05
AT1G06430	1.05033	1.05036	8.38891	9.80085e-06
AT1G06440	1.07246	1.07449	1.43252	0.0046762
AT1G06450	0.602962	0.603658	2.40961	0.00529936
AT1G06460	1.2986	1.29888	4.97291	2.58002e-07
AT1G06510	0.986844	0.987385	3.91452	0.00014386
AT1G06530	0.714682	0.714784	5.67075	0.00052539
AT1G06560	0.972392	0.972761	4.00067	2.54938e-05
AT1G06630	0.494609	0.494755	4.2796	0.00357245
AT1G06645	0.834411	0.835055	3.32382	0.000680089
AT1G06650	0.977457	0.977632	5.49276	3.15766e-05
AT1G06690	1.13285	1.133	6.0357	9.40411e-06
AT1G06710	1.13475	1.13569	2.872	2.91321e-05
AT1G06720	0.777058	0.777173	5.6646	0.0020575
AT1G06770	0.614167	0.614585	3.24682	0.000864161
AT1G06820	0.545682	0.545795	5.13559	0.00177494
AT1G06900	0.727725	0.727793	6.15961	0.000118968
AT1G06950	1.27529	1.27535	7.56407	7.746e-09
AT1G07010	1.06695	1.06702	6.73387	6.82007e-05
AT1G07110	1.08156	1.08161	7.28074	2.40403e-06
AT1G07170	0.765318	0.765682	3.67256	7.51111e-05
AT1G07180	1.02362	1.0237	7.02529	0.000287772
AT1G07200	0.847533	0.847642	5.64221	2.5819e-05
AT1G07320	1.45926	1.45931	8.08007	3.16331e-06
AT1G07330	1.5993	1.62949	-1.04087	0.0214074
AT1G07390	1.52906	1.53099	2.75076	2.51019e-06
AT1G07440	1.66502	1.66558	4.51751	4.82499e-07
AT1G07450	1.85306	1.85545	2.6864	3.02849e-06
AT1G07550	0.909342	0.911751	1.59935	0.00615103
AT1G07615	0.858683	0.859198	3.40363	0.000186616
AT1G07645	0.953033	0.956063	0.981685	0.00498475
AT1G07700	0.906651	0.906796	5.67698	7.35642e-06
AT1G07745	1.02769	1.02869	2.69844	2.73703e-05
AT1G07830	0.517484	0.517641	4.31013	0.00846238
AT1G07970	0.705173	0.705443	4.09222	0.000101965
AT1G08110	0.585561	0.585609	6.20325	0.00078725
AT1G08210	1.07104	1.07135	4.43533	6.76585e-08
AT1G08450	0.656212	0.656282	5.78109	0.000327053
AT1G08460	0.594974	0.595117	4.59184	0.000907699
AT1G08465	0.725102	0.725698	3.37063	0.000600189
AT1G08490	0.848359	0.848478	5.70919	1.40707e-06
AT1G08520	1.35	1.35007	7.50423	3.80306e-06
AT1G08540	1.03297	1.03311	6.23011	3.56619e-06
AT1G08550	1.41644	1.41673	5.02641	5.31389e-07
AT1G08570	0.768603	0.768639	7.1233	3.22466e-05
AT1G08610	0.85528	0.856192	3.04015	0.0038606
AT1G08630	2.1357	2.13782	3.2909	1.89481e-06
AT1G08640	0.877924	0.878034	6.09146	9.08504e-07
AT1G08900	1.61908	1.62019	3.45265	9.55534e-05
AT1G08910	1.15244	1.15274	4.48633	3.74207e-07
AT1G08980	1.89766	1.8981	5.01104	1.09042e-06
AT1G09080	2.98398	2.98842	2.09623	5.4735e-06
AT1G09130	0.70152	0.701563	6.82416	5.31791e-05
AT1G09230	0.548439	0.548602	4.25586	0.00219457
AT1G09280	0.908295	0.908534	4.58761	3.79741e-06
AT1G09300	0.716248	0.716544	3.7664	7.18394e-05
AT1G09340	1.37256	1.37258	9.3561	2.26344e-06
AT1G09380	1.22821	1.23432	0.341301	0.0125401
AT1G09410	0.820317	0.82331	0.503081	0.0173218
AT1G09415	2.14926	2.15201	2.75387	6.89933e-06
AT1G09420	0.767855	0.768244	3.76321	0.000496741
AT1G09480	1.32138	1.32284	2.29	0.000516683
AT1G09520	0.474049	0.474233	4.00729	0.0129043
AT1G09620	0.571985	0.572007	7.47359	0.00174178
AT1G09640	0.483548	0.483559	8.16815	0.00598522
AT1G09700	0.585189	0.585474	3.76411	0.00376158
AT1G09750	0.998083	0.998205	6.0496	0.000178717
AT1G09770	0.746581	0.746623	6.8113	1.26758e-05
AT1G09795	0.694879	0.695008	5.13613	2.23636e-05
AT1G09820	0.59792	0.598499	2.73363	0.0113015
AT1G09830	0.440953	0.441046	5.19073	0.00660928
AT1G09900	0.767967	0.768246	4.41623	3.71802e-05
AT1G09910	0.649915	0.650122	4.05653	0.000449049
AT1G09940	0.717427	0.717576	4.82566	2.32183e-05
AT1G10000	1.07488	1.08028	0.327302	0.0158665
AT1G10070	1.42575	1.42795	2.66769	0.00172818
AT1G10095	0.715244	0.715767	2.81322	0.00113729
AT1G10150	0.691932	0.692231	3.89891	0.000731753
AT1G10155	1.25075	1.25369	2.08095	0.00604103
AT1G10170	0.5768	0.576845	6.05731	0.0146813
AT1G10240	0.539266	0.539642	3.19845	0.00385031
AT1G10340	1.64982	1.65477	1.76099	1.74831e-05
AT1G10360	1.32687	1.32716	5.18643	4.761e-06
AT1G10490	0.548879	0.548981	5.26144	0.016882
AT1G10510	0.810258	0.810376	5.73001	9.99062e-07
AT1G10522	0.983734	0.984223	4.0803	1.52028e-05
AT1G10570	1.24336	1.24362	4.74831	2.5797e-08
AT1G10585	2.31203	2.31557	2.58303	3.87584e-06
AT1G10600	0.716325	0.716567	4.11829	0.00015141
AT1G10610	1.15069	1.15164	2.93337	1.97816e-05
AT1G10657	0.600204	0.600771	3.2099	0.016204
AT1G10660	0.494213	0.494261	5.71747	0.0109763
AT1G10740	0.797948	0.798032	5.89046	1.40817e-05
AT1G10760	0.536006	0.536046	6.27405	0.00499802
AT1G10830	0.736577	0.736829	4.45725	0.000332613
AT1G10840	0.457343	0.457371	6.88442	0.00379289
AT1G10865	0.891736	0.892	4.27801	1.04263e-05
AT1G10910	1.41987	1.42014	5.30414	3.48588e-08
AT1G10920	1.5888	1.59024	2.88498	1.45101e-06
AT1G10960	1.20003	1.20007	8.85903	2.22615e-05
AT1G11070	4.35554	4.79918	-0.410977	0.000272539
AT1G11080	0.899267	0.899793	4.04406	0.00258149
AT1G11180	1.06035	1.06138	2.78766	0.000229697
AT1G11240	0.485674	0.485806	4.60459	0.00688588
AT1G11290	1.42054	1.42209	2.58555	6.98981e-07
AT1G11303	1.16749	1.16872	2.57943	8.96626e-06
AT1G11330	1.17424	1.17445	5.00139	4.51964e-08
AT1G11350	1.09996	1.10028	4.34716	0.000353386
AT1G11400	0.71661	0.716759	4.824	1.31825e-05
AT1G11430	1.1536	1.15375	6.13285	1.42549e-06
AT1G11440	0.653423	0.65383	3.34189	0.00318891
AT1G11530	1.00426	1.0049	3.51724	0.00567181
AT1G11630	0.803613	0.804194	3.14655	9.95297e-05
AT1G11710	1.08087	1.08204	2.54854	0.000120112
AT1G11720	0.777118	0.777184	6.3629	2.76717e-06
AT1G11750	0.672673	0.672747	6.23548	0.00034927
AT1G11755	0.733639	0.734089	3.35316	0.000746733
AT1G11820	0.772558	0.772643	6.17393	2.18803e-05
AT1G11850	1.01245	1.01333	3.8289	0.00544202
AT1G11860	1.17277	1.17279	9.71938	2.40277e-06
AT1G11870	0.744803	0.744989	4.97894	1.37405e-05
AT1G11930	0.425527	0.425579	5.61286	0.0143944
AT1G12010	0.86559	0.866061	3.87672	6.77312e-06
AT1G12020	1.46993	1.47061	3.93615	5.79677e-07
AT1G12030	3.08909	3.09751	1.80587	6.02793e-07
AT1G12120	0.586173	0.58626	5.37878	0.000225405
AT1G12210	1.05957	1.06091	2.1323	5.59588e-05
AT1G12220	0.722006	0.722562	2.98013	0.00202366
AT1G12240	0.599721	0.599737	7.84404	0.000154384
AT1G12244	0.718479	0.719135	3.07081	0.000742212
AT1G12250	1.24039	1.24057	5.7155	4.20256e-05
AT1G12280	1.53325	1.5341	3.48743	3.24735e-08
AT1G12320	1.43309	1.43421	3.22332	4.96825e-06
AT1G12410	0.827305	0.827362	6.87341	2.55508e-05
AT1G12440	0.778649	0.778733	6.0052	5.38434e-05
AT1G12520	1.50317	1.50325	6.82587	1.32658e-07
AT1G12580	0.445888	0.445947	5.64792	0.00840267
AT1G12700	0.787565	0.789241	1.91865	0.0130736
AT1G12770	0.904506	0.904654	5.52425	2.26034e-06
AT1G12780	1.08584	1.08603	5.47485	5.76582e-05
AT1G12790	1.65805	1.66083	2.0191	7.49107e-06
AT1G12800	1.05449	1.05455	7.36418	6.75818e-07
AT1G12805	3.34815	3.57543	-1.13052	0.0028889
AT1G12860	1.39391	1.39446	4.57593	4.28196e-08
AT1G12880	0.971888	0.972599	2.93509	1.82251e-05
AT1G12900	1.40926	1.40927	10.4779	1.54761e-05
AT1G12910	0.539404	0.539507	4.92079	0.000393771
AT1G12920	0.542594	0.542624	6.87839	0.00135783
AT1G12930	0.469796	0.469911	4.70279	0.0124947
AT1G13030	0.640378	0.64082	3.41697	0.00215298
AT1G13080	0.425417	0.425471	5.73567	0.0170008
AT1G13150	1.58259	1.58864	0.807046	0.000148768
AT1G13220	0.699306	0.699519	4.47329	0.0021968
AT1G13230	1.67279	1.70371	-1.15399	0.0139395
AT1G13245	1.2989	1.29918	5.21563	9.27529e-06
AT1G13260	0.930518	0.931017	4.10242	3.09274e-06
AT1G13270	1.33464	1.33503	4.78894	5.28324e-07
AT1G13350	0.554251	0.55433	5.28743	0.00255425
AT1G13380	0.673707	0.673865	4.7767	0.00032893
AT1G13390	0.479205	0.479293	4.75245	0.00803969
AT1G13400	1.52209	1.53977	-0.788175	0.019997
AT1G13570	0.718632	0.718879	3.98364	7.66409e-05
AT1G13630	0.787674	0.78911	1.92159	0.00743801
AT1G13640	1.50459	1.50474	6.28011	3.88021e-09
AT1G13700	1.58664	1.59119	2.12128	1.53806e-05
AT1G13710	0.865004	0.865413	3.75168	0.00215423
AT1G13780	0.711937	0.712673	2.61552	0.00235523
AT1G13800	0.859586	0.860759	2.19939	0.00133573
AT1G13810	0.81714	0.817756	3.22303	0.000520629
AT1G13820	0.966002	0.966257	5.16347	1.68743e-05
AT1G13940	0.499244	0.499415	4.25173	0.00970875
AT1G14030	1.09731	1.09766	4.64634	4.3636e-06
AT1G14060	0.519092	0.51925	4.40008	0.0066825
AT1G14150	1.05505	1.05521	5.71669	0.000142914
AT1G14200	1.37616	1.37737	3.19472	1.1232e-05
AT1G14205	1.25193	1.25748	0.728274	0.000817756
AT1G14250	1.26755	1.27616	0.715112	0.0230538
AT1G14270	1.18968	1.18993	5.3273	5.66854e-07
AT1G14300	0.786908	0.78718	4.15031	0.000512809
AT1G14345	1.34629	1.34642	6.57169	1.09616e-06
AT1G14410	0.699058	0.699342	4.28599	0.000257489
AT1G14440	0.825538	0.826287	3.19727	0.0030415
AT1G14470	1.04687	1.05172	0.360301	0.00967587
AT1G14580	0.750064	0.750391	3.89329	0.000868914
AT1G14590	0.970969	0.971761	3.08105	0.00165652
AT1G14620	0.60226	0.602379	4.80451	0.00213468
AT1G14640	0.904949	0.906066	2.10164	0.0041354
AT1G14642	1.61337	1.62744	-0.459708	0.0102905
AT1G14650	0.522428	0.522473	6.10893	0.00486708
AT1G14687	1.37793	1.38178	1.20269	0.000486456
AT1G14760	1.3569	1.36564	-0.130394	0.0052284
AT1G14770	0.565257	0.565801	2.74014	0.0063174
AT1G14810	0.911449	0.911508	6.79052	7.0314e-07
AT1G14820	0.460081	0.460216	4.29416	0.0041109
AT1G14840	0.58915	0.589371	4.81777	0.000317787
AT1G14880	7.8036	8.05263	1.61234	2.67758e-06
AT1G15125	2.68507	2.6875	3.19654	5.11552e-07
AT1G15140	1.02761	1.02776	5.84519	2.50871e-08
AT1G15160	1.356	1.35776	2.5253	8.44721e-07
AT1G15180	1.81394	1.81438	5.23799	4.1367e-08
AT1G15200	0.808839	0.808933	5.8464	5.64767e-06
AT1G15230	0.469658	0.46977	4.55441	0.00867657
AT1G15250	0.626263	0.626575	4.0923	0.00586496
AT1G15290	1.24597	1.24602	7.78975	1.51531e-07
AT1G15390	1.26137	1.26174	4.74703	5.23169e-08
AT1G15410	0.664342	0.664518	4.87732	0.00019008
AT1G15415	3.25401	3.28835	-0.0801145	0.000118039
AT1G15420	0.519142	0.519272	4.642	0.0126057
AT1G15480	0.519729	0.519987	3.56666	0.0206151
AT1G15500	1.34488	1.3449	8.45805	2.80653e-09
AT1G15510	1.09362	1.09424	3.81824	1.74342e-05
AT1G15670	0.901584	0.901863	4.43013	9.57367e-05
AT1G15730	1.10834	1.10857	5.44437	2.78549e-05
AT1G15750	0.816222	0.816244	7.93382	1.95325e-05
AT1G15790	1.03524	1.03736	1.73164	0.00181557
AT1G15825	1.39149	1.40035	1.19392	0.000610486
AT1G15830	1.28931	1.29157	3.07832	2.6109e-05
AT1G15870	1.09078	1.09373	1.23208	0.00714867
AT1G15885	1.3464	1.34981	1.36731	0.000374366
AT1G15910	0.57002	0.570153	4.72494	0.00152821
AT1G15920	0.48772	0.487847	4.38755	0.00505638
AT1G15930	0.586921	0.58694	7.76696	0.0018027
AT1G15940	0.490468	0.490588	4.88499	0.0108641
AT1G15980	1.1447	1.14477	7.04819	3.92158e-05
AT1G16030	0.508816	0.509303	2.64881	0.013694
AT1G16080	1.23887	1.23896	6.91091	8.28218e-07
AT1G16090	1.2462	1.2477	2.85344	1.07056e-05
AT1G16260	2.24587	2.24681	4.2889	3.12923e-09
AT1G16320	0.817862	0.817956	6.00787	0.00116107
AT1G16445	1.30616	1.30938	1.938	0.00209628
AT1G16460	0.421355	0.421417	5.51619	0.020067
AT1G16510	1.03746	1.03816	3.02478	0.000303837
AT1G16720	1.42419	1.42423	8.21506	5.61613e-06
AT1G16790	0.822856	0.823913	2.60071	0.000456172
AT1G16830	0.895182	0.897125	1.64202	0.0169301
AT1G16880	1.32286	1.32289	8.3034	1.5954e-06
AT1G17100	0.763105	0.763143	7.00274	0.00158528
AT1G17200	1.13305	1.13326	5.31777	9.47587e-05
AT1G17220	1.22999	1.23002	8.50812	1.0607e-07
AT1G17380	0.932592	0.93379	1.93934	0.0070224
AT1G17470	0.744777	0.744828	6.57846	9.63308e-06
AT1G17530	1.06233	1.06253	4.90217	1.25474e-05
AT1G17580	0.553096	0.553173	5.52399	0.00797895
AT1G17600	2.26024	2.26491	2.3783	6.26563e-07
AT1G17630	0.911933	0.91365	1.55219	0.00132435
AT1G17650	1.13622	1.13657	4.91327	4.00206e-06
AT1G17665	0.773773	0.775676	0.971752	0.0191332
AT1G17690	0.512061	0.512166	5.08909	0.00943907
AT1G17840	0.426719	0.426748	6.6506	0.0133869
AT1G17850	0.661559	0.661871	3.89276	0.000968927
AT1G17960	3.53392	3.53729	3.21781	3.54809e-10
AT1G17990	1.8636	1.86462	3.95838	0.000413952
AT1G18000	0.839819	0.840164	4.50653	1.14809e-05
AT1G18020	3.21971	3.22246	4.20532	4.97491e-05
AT1G18060	0.940614	0.940711	6.51163	0.00239344
AT1G18170	1.12807	1.12845	4.50886	0.000130015
AT1G18300	0.917216	0.918276	2.7777	0.00321684
AT1G18330	1.21017	1.21043	5.07622	2.30964e-08
AT1G18400	0.950954	0.951321	4.32182	0.01045
AT1G18450	0.62634	0.626418	5.61173	6.19639e-05
AT1G18485	1.85241	1.85356	3.68154	3.71798e-08
AT1G18500	0.498599	0.498637	6.41538	0.00109283
AT1G18620	0.58378	0.583915	4.99588	0.0058847
AT1G18650	0.825058	0.825456	4.10167	0.000288343
AT1G18680	1.2633	1.2646	2.70838	3.50502e-06
AT1G18690	0.485734	0.485987	3.25453	0.0159973
AT1G18730	1.18778	1.18794	5.76629	0.000113181
AT1G18750	0.587526	0.588149	2.7527	0.0121353
AT1G18773	1.47658	1.47954	1.90088	0.000226116
AT1G18810	1.80742	1.80828	4.11279	2.62535e-08
AT1G18830	1.27211	1.28885	-0.938232	0.0214575
AT1G19140	0.521724	0.521796	5.5397	0.00223989
AT1G19150	0.903391	0.903485	6.3293	0.00139186
AT1G19290	0.993347	0.993898	3.44348	0.000122214
AT1G19340	0.614178	0.615271	2.0356	0.00926601
AT1G19350	0.544355	0.544411	6.58679	0.0120376
AT1G19490	0.714858	0.715092	4.20915	0.00134479
AT1G19540	1.18139	1.1841	1.92596	0.000733496
AT1G19600	1.08179	1.0819	6.04937	6.83903e-08
AT1G19670	1.89186	1.89214	5.44093	8.75635e-08
AT1G19680	1.6257	1.626	5.07766	2.44809e-09
AT1G19690	0.489976	0.490292	3.14424	0.0208331
AT1G19715	0.79281	0.792911	5.77372	1.55092e-06
AT1G19720	1.27571	1.27594	5.64547	3.7301e-07
AT1G19740	0.712922	0.713	5.91057	0.00238667
AT1G19790	1.16561	1.17298	0.138012	0.0142194
AT1G19960	2.1309	2.1333	2.62593	2.46072e-06
AT1G20020	1.18385	1.18388	8.09905	5.39869e-05
AT1G20120	2.45947	2.48712	0.496804	2.14278e-05
AT1G20340	0.946831	0.946834	11.0226	0.0035429
AT1G20470	0.814752	0.815696	2.55307	0.00352259
AT1G20490	1.04296	1.04382	2.71776	0.000281035
AT1G20540	0.45426	0.454404	4.28793	0.0081325
AT1G20560	0.417719	0.417767	5.49948	0.00825352
AT1G20630	0.547577	0.547693	4.70769	0.00573731
AT1G20810	0.855614	0.855825	4.98811	0.000302974
AT1G20816	0.939694	0.940543	3.17029	3.89062e-05
AT1G20890	0.533938	0.534184	3.56203	0.0102652
AT1G20910	0.846547	0.846889	4.02485	5.42257e-06
AT1G20920	0.636107	0.636181	5.67671	0.00189697
AT1G21060	1.70174	1.70246	4.12834	1.59731e-07
AT1G21065	0.735116	0.735212	5.88247	0.00103328
AT1G21130	0.939738	0.939856	5.60862	0.000157982
AT1G21150	0.991827	0.99337	1.9405	0.00168409
AT1G21160	0.763769	0.763932	4.93998	1.78225e-05
AT1G21240	3.71602	3.74721	0.763636	0.000161191
AT1G21250	2.49805	2.4987	5.04585	1.05746e-06
AT1G21320	0.780532	0.781114	2.22562	0.0229408
AT1G21350	0.883004	0.883297	4.69985	2.87761e-05
AT1G21400	0.966021	0.966192	5.32627	5.55946e-05
AT1G21410	0.700813	0.701012	4.37372	0.00048101
AT1G21460	0.551978	0.552054	5.43353	0.00420868
AT1G21520	1.96374	1.96459	3.52083	4.53563e-07
AT1G21580	0.674267	0.674314	6.43028	0.00193922
AT1G21600	1.71108	1.71136	5.62315	1.64711e-09
AT1G21650	0.747071	0.747227	4.77671	0.000149599
AT1G21710	0.760146	0.760408	4.09349	3.83602e-05
AT1G21770	1.01325	1.01338	5.71013	1.12018e-06
AT1G21840	0.737381	0.738323	2.28298	0.00261341
AT1G21910	0.683826	0.684358	3.48619	0.00625812
AT1G22210	1.60625	1.62899	-1.34464	0.0219881
AT1G22250	1.05324	1.05795	0.836376	0.00787727
AT1G22340	0.961825	0.965674	0.63443	0.0095619
AT1G22370	1.08466	1.08637	1.79003	0.00127455
AT1G22380	3.01691	3.05622	-0.263008	0.000130924
AT1G22400	1.04848	1.04861	5.56867	7.50176e-06
AT1G22430	1.22081	1.22097	5.78617	4.81181e-07
AT1G22570	0.686914	0.687492	2.63175	0.00354442
AT1G22590	1.61427	1.61542	3.84614	7.08483e-06
AT1G22630	1.48796	1.48822	5.46282	8.08118e-06
AT1G22700	0.979879	0.979998	6.01483	0.000144373
AT1G22730	0.481523	0.481598	5.30054	0.0012259
AT1G22850	0.495945	0.495965	7.28251	0.00803845
AT1G22885	0.59058	0.590859	3.68602	0.0163494
AT1G22890	0.806206	0.806537	3.98364	0.00623715
AT1G22940	0.753151	0.753411	4.29093	2.20818e-05
AT1G23090	1.53009	1.53048	5.393	2.04142e-10
AT1G23180	0.703617	0.70381	4.8385	4.97679e-05
AT1G23280	0.545698	0.5458	5.2464	0.00519501
AT1G23310	1.81748	1.81749	11.3475	2.30561e-06
AT1G23360	0.982627	0.983068	3.96745	2.58019e-05
AT1G23390	2.29077	2.29132	5.62744	9.70009e-10
AT1G23400	1.11974	1.11992	5.68579	1.49402e-06
AT1G23450	1.56228	1.56791	0.582344	0.00198895
AT1G23730	1.33911	1.34069	3.31844	0.000626582
AT1G23740	0.705185	0.705213	7.89145	0.00370643
AT1G23840	2.42732	2.44033	0.550075	3.99647e-05
AT1G23860	0.894328	0.894477	5.16745	7.66346e-06
AT1G24040	0.75295	0.753231	4.23028	0.00184234
AT1G24095	1.10178	1.10268	2.57216	0.000113095
AT1G24145	1.05631	1.05893	1.37101	0.0145413
AT1G24147	2.87723	2.89287	1.51172	2.28644e-06
AT1G24148	0.663224	0.6637	3.25162	0.0210457
AT1G24340	0.881028	0.881182	5.36091	1.37613e-06
AT1G24490	0.545458	0.545569	5.07779	0.000449975
AT1G24610	0.638236	0.63841	4.71352	0.000467918
AT1G24706	0.447906	0.447954	5.92659	0.0218331
AT1G24880	0.861155	0.86117	8.22584	3.81144e-05
AT1G24996	0.474142	0.474181	6.10874	0.00628852
AT1G25260	0.956618	0.956697	6.2859	1.66372e-06
AT1G25290	1.21716	1.21806	3.3628	3.22339e-07
AT1G25420	0.413559	0.41364	4.93984	0.00920819
AT1G25440	0.767901	0.768011	6.20982	0.000550098
AT1G25470	1.05381	1.05423	3.92073	9.12339e-06
AT1G25520	0.577686	0.577802	5.1693	0.00142392
AT1G25560	0.806733	0.806886	5.29002	4.08644e-05
AT1G26090	0.67695	0.677488	3.16689	0.000828173
AT1G26150	1.36142	1.36161	5.64316	1.01612e-06
AT1G26180	1.13022	1.13063	4.32121	1.34143e-06
AT1G26220	0.84761	0.847872	4.75535	0.00221312
AT1G26240	1.74828	1.75054	1.8803	0.000327056
AT1G26250	2.6064	2.60671	5.58411	1.20089e-07
AT1G26540	1.0354	1.03912	1.81607	0.000414823
AT1G26560	0.632649	0.632925	4.64922	0.00215637
AT1G26580	0.96024	0.960302	6.34274	1.49397e-07
AT1G26620	0.705088	0.705497	3.41006	0.000950773
AT1G26665	0.717948	0.71808	4.70138	0.00011353
AT1G26670	0.622853	0.622899	6.13651	0.00127486
AT1G26720	4.2322	4.23946	2.59312	1.13107e-10
AT1G26761	0.693193	0.693499	4.43274	0.00652425
AT1G26790	0.937285	0.937657	4.25069	0.0058026
AT1G26800	1.1809	1.18314	2.22863	7.64678e-05
AT1G27020	0.737329	0.737396	5.75904	0.0161879
AT1G27050	0.630047	0.630417	3.81664	0.00325204
AT1G27060	0.783824	0.785458	1.85988	0.00516285
AT1G27070	0.441833	0.442063	3.58505	0.0229945
AT1G27090	0.521031	0.521062	6.87852	0.00124062
AT1G27360	0.780648	0.781093	3.54239	0.00026379
AT1G27370	0.653416	0.653622	4.40374	0.00105912
AT1G27410	1.58459	1.58662	2.42951	5.33212e-07
AT1G27470	0.85222	0.852372	5.17818	0.000341997
AT1G27480	1.03043	1.03064	5.16913	1.00622e-05
AT1G27510	0.99867	0.998791	5.99068	2.65057e-07
AT1G27520	0.73037	0.730476	5.31327	0.000184435
AT1G27595	0.578371	0.578455	5.43582	0.00505221
AT1G27650	0.809687	0.809775	5.93625	7.64199e-06
AT1G27750	0.538688	0.538847	4.36221	0.0148898
AT1G27920	1.01796	1.0181	5.24996	1.85866e-06
AT1G27940	0.841195	0.842994	2.48336	0.00656637
AT1G27950	0.541411	0.541442	7.11106	0.00284896
AT1G28010	1.62632	1.6271	4.26991	4.35564e-09
AT1G28140	0.977551	0.977734	5.3376	0.000111641
AT1G28150	1.02116	1.0215	4.32894	0.000235033
AT1G28210	0.949064	0.950185	2.45867	0.00274484
AT1G28320	0.468713	0.468805	4.93772	0.00948718
AT1G28330	0.943087	0.943247	5.13578	0.00166913
AT1G28530	0.552995	0.553472	3.13108	0.0204127
AT1G28560	1.01294	1.01417	2.35977	0.000569948
AT1G28670	0.558189	0.558304	5.43473	0.00382425
AT1G28690	0.95303	0.95669	0.520648	0.0156269
AT1G29070	1.75256	1.75269	7.50959	1.44643e-06
AT1G29100	7.78805	1.44269e+08	-1.21697	8.96695e-05
AT1G29110	1.48243	1.48702	0.695813	0.00257537
AT1G29120	0.533224	0.533302	5.42221	0.000949474
AT1G29320	0.614246	0.614512	4.05377	0.00290205
AT1G29420	1.57278	1.59675	-0.261002	0.00357408
AT1G29430	1.01961	1.02066	3.24818	0.00406719
AT1G29450	1.62269	1.62746	1.91826	0.00118831
AT1G29465	0.940602	0.941668	2.77072	0.000249314
AT1G29500	1.05456	1.05823	1.77953	0.00898896
AT1G29530	0.949193	0.949618	4.40321	2.58633e-05
AT1G29600	2.88128	2.88874	1.62146	7.00694e-08
AT1G29700	0.608218	0.608323	5.47392	0.000718296
AT1G29720	1.15214	1.15253	4.83531	0.000592863
AT1G29740	1.35026	1.36402	-0.273861	0.0148764
AT1G29830	1.4372	1.44945	-0.655675	0.0107001
AT1G29900	0.758089	0.75812	7.51714	0.000129651
AT1G29940	0.679881	0.679964	5.87413	0.00240817
AT1G30210	0.857072	0.857371	4.3306	0.000363101
AT1G30230	1.127	1.12702	8.95638	6.46374e-08
AT1G30410	0.80996	0.810045	5.78549	0.000814478
AT1G30460	0.544947	0.545146	4.21387	0.00216501
AT1G30520	0.960246	0.960679	4.63816	5.61722e-05
AT1G30610	0.8443	0.844643	4.40294	6.35388e-05
AT1G30680	0.871357	0.871536	5.08097	9.24779e-07
AT1G30880	1.21964	1.21974	6.20258	1.39363e-08
AT1G31180	0.672354	0.672439	6.07523	1.99999e-05
AT1G31190	0.728386	0.728527	5.1455	0.00066957
AT1G31280	0.662325	0.662497	4.55786	3.82189e-05
AT1G31290	1.20205	1.20994	0.509647	0.0090954
AT1G31350	0.86026	0.860601	4.03335	0.000118978
AT1G31410	0.621945	0.622192	4.2302	0.000437406
AT1G31540	0.902206	0.902336	5.39968	1.25918e-05
AT1G31550	0.633247	0.634233	2.02302	0.0177048
AT1G31580	1.17572	1.17574	7.76383	0.000138236
AT1G31600	0.455316	0.455387	5.16269	0.00630698
AT1G31650	0.717881	0.718055	4.9167	3.53928e-05
AT1G31800	1.55919	1.55932	6.76598	2.44822e-09
AT1G31814	0.514462	0.514788	3.23036	0.0144648
AT1G31820	1.8123	1.81449	2.8406	1.04713e-07
AT1G31835	1.39842	1.40325	1.75243	0.000500588
AT1G31970	0.662769	0.662816	6.77578	0.000179083
AT1G32060	0.685542	0.685546	10.3776	0.00976359
AT1G32080	1.40184	1.40188	7.91912	1.05624e-06
AT1G32120	1.28216	1.28403	2.51044	4.05721e-05
AT1G32160	0.863526	0.863644	5.69282	0.000329127
AT1G32200	1.24826	1.24843	6.0285	2.73052e-07
AT1G32220	0.881878	0.882017	5.87225	0.000944033
AT1G32270	1.12698	1.13198	0.697793	0.00744163
AT1G32310	0.620748	0.621153	3.24468	0.0068582
AT1G32350	1.59502	1.59691	1.86607	0.00147683
AT1G32370	0.470762	0.470976	3.55868	0.00720767
AT1G32415	0.720716	0.722435	1.15807	0.016493
AT1G32470	1.45845	1.4585	8.08336	1.60023e-05
AT1G32490	0.606493	0.606567	5.7091	0.00047406
AT1G32500	0.970521	0.970641	5.98641	9.39087e-06
AT1G32550	1.00638	1.00669	4.77806	0.000117037
AT1G32580	0.51525	0.515331	5.37644	0.00296252
AT1G32583	1.52695	1.53055	1.54364	0.000428308
AT1G32610	0.917618	0.920412	1.01419	0.0145768
AT1G32780	1.10946	1.111	2.49891	9.62606e-05
AT1G32928	1.24743	1.25098	1.99594	0.000274533
AT1G32960	2.5564	2.57097	0.52143	0.00126937
AT1G32990	0.885788	0.88585	7.17204	0.000471117
AT1G33030	1.02603	1.02788	1.47734	0.0149507
AT1G33050	0.736184	0.736239	6.10192	3.98104e-05
AT1G33055	4.94754	5.03302	0.922609	2.39987e-08
AT1G33060	0.516365	0.516588	3.75888	0.00331367
AT1G33080	1.12273	1.12336	3.37278	1.27612e-06
AT1G33102	0.883674	0.885297	1.55218	0.00380782
AT1G33110	0.575438	0.575462	6.9535	0.000290812
AT1G33250	0.573724	0.573839	4.92498	0.00120089
AT1G33290	1.42881	1.42925	4.80409	2.9344e-08
AT1G33350	0.910606	0.912193	1.64525	0.00662493
AT1G33390	0.722735	0.722954	4.45555	0.00320003
AT1G33410	0.574785	0.57486	5.63564	0.00663661
AT1G33420	0.658749	0.659035	3.65169	0.0017797
AT1G33560	0.750686	0.750841	4.80075	6.84036e-05
AT1G33600	1.19508	1.19548	4.85371	1.20335e-07
AT1G33640	2.55812	2.59877	-0.74919	0.000225893
AT1G33680	0.510723	0.51077	6.09161	0.00297928
AT1G33790	1.66986	1.67025	4.57942	7.08573e-09
AT1G33810	0.612519	0.612644	5.27535	0.00199208
AT1G33960	5.27881	5.29311	2.85917	3.89283e-08
AT1G34000	0.99567	0.995727	7.17722	0.000122771
AT1G34050	1.64254	1.66195	-0.607889	0.0132347
AT1G34210	0.633291	0.633393	5.22485	0.000217234
AT1G34245	1.78816	1.79312	1.57611	4.53849e-06
AT1G34315	1.08319	1.08404	2.76666	7.06654e-05
AT1G34317	0.866238	0.868834	0.81607	0.0158927
AT1G34380	0.75691	0.758184	1.89058	0.0084247
AT1G34570	0.676557	0.676958	3.69838	0.000727749
AT1G34580	1.31666	1.32152	0.627453	0.00123656
AT1G35230	1.22446	1.22704	1.27696	0.00358114
AT1G35290	1.63917	1.64247	1.95227	2.83418e-05
AT1G35310	0.792143	0.79345	1.76044	0.0170098
AT1G35320	0.731022	0.731185	4.70282	0.00068757
AT1G35340	0.88088	0.881077	5.12478	4.67869e-05
AT1G35420	1.71965	1.71987	5.61213	5.09462e-07
AT1G35430	0.748151	0.748903	2.59707	0.00121955
AT1G35516	1.22506	1.22516	6.10732	1.7864e-08
AT1G35680	1.21164	1.2117	7.72747	4.02261e-05
AT1G35710	3.40921	3.41035	4.71866	4.20627e-09
AT1G35830	1.8682	1.8823	0.498801	0.001661
AT1G36180	2.77844	2.77941	4.32407	4.18483e-11
AT1G36320	0.719358	0.719436	6.04431	0.000111483
AT1G36370	2.08478	2.08487	7.09422	3.4832e-10
AT1G36390	0.688807	0.689058	4.47864	0.000665015
AT1G42430	1.60064	1.60102	5.90517	7.39727e-08
AT1G42540	0.708299	0.708444	5.07249	3.78766e-05
AT1G42550	1.16137	1.16142	7.49129	1.14253e-06
AT1G42560	1.7719	1.8013	-0.188438	0.0126712
AT1G42970	1.72139	1.7214	10.9207	8.92681e-07
AT1G43310	2.57159	2.61611	-0.797515	0.000740949
AT1G43560	1.09355	1.09374	5.4546	4.30006e-05
AT1G43580	0.463187	0.463266	5.06573	0.0041894
AT1G43605	3.61035	3.70728	0.441535	2.67436e-06
AT1G43670	1.08508	1.08514	7.05042	9.37787e-07
AT1G43910	0.930472	0.93054	5.80116	0.000475333
AT1G44000	1.47213	1.47226	6.91739	1.04669e-07
AT1G44030	1.69622	1.73755	-1.37414	0.0103688
AT1G44120	0.861936	0.862428	3.3011	0.000970265
AT1G44446	0.906714	0.90675	7.64764	0.000704558
AT1G44575	0.694697	0.694702	10.1484	0.00295145
AT1G44790	0.621811	0.622027	4.28636	0.00289916
AT1G44890	2.27758	2.28623	1.21578	9.43572e-06
AT1G44920	0.848143	0.848255	5.8635	8.65896e-05
AT1G45110	1.00689	1.00902	1.86677	0.00420173
AT1G45165	1.54204	1.5459	1.20603	0.000125878
AT1G45229	0.602181	0.603391	1.3826	0.0228962
AT1G45230	1.32611	1.32635	5.63596	9.36123e-08
AT1G45332	0.510964	0.511035	5.3461	0.00403876
AT1G45474	1.0767	1.07679	6.71873	0.000171086
AT1G47210	0.663212	0.663401	4.46006	0.0012932
AT1G47270	1.29629	1.29675	4.2309	2.74433e-06
AT1G47370	2.89283	3.04236	-1.16714	0.00875689
AT1G47490	0.576062	0.576116	6.28696	0.000632308
AT1G47500	0.488568	0.488635	5.61985	0.00564478
AT1G47570	0.592194	0.592321	4.55799	0.000113759
AT1G47580	1.47013	1.47096	3.9703	7.08092e-07
AT1G47820	0.787272	0.788152	2.48271	0.0013278
AT1G48030	0.779509	0.779525	8.21327	3.1086e-05
AT1G48170	0.486534	0.486783	3.52791	0.0160265
AT1G48350	1.17126	1.17135	7.24899	2.42814e-05
AT1G48390	0.952056	0.955389	0.866548	0.0138559
AT1G48430	0.438041	0.438093	5.4193	0.0218761
AT1G48450	0.923625	0.923701	6.59787	4.74307e-06
AT1G48520	0.735838	0.735946	5.83024	6.63845e-05
AT1G48540	0.497666	0.497778	4.86431	0.00100532
AT1G48550	0.653276	0.653654	3.47829	0.000525915
AT1G48570	0.90967	0.909936	4.78082	3.36951e-05
AT1G48605	1.04473	1.04644	1.62236	0.000883008
AT1G48650	1.22075	1.22084	6.78319	2.2011e-08
AT1G48660	1.4037	1.41337	-0.0326879	0.00483973
AT1G48950	0.631262	0.631458	4.44245	0.000688523
AT1G48970	0.608788	0.608947	4.5304	0.000213827
AT1G49010	1.42712	1.42774	4.39056	1.10069e-06
AT1G49032	2.00393	2.00481	3.97228	8.86008e-07
AT1G49180	0.980676	0.981458	3.03602	0.000175906
AT1G49200	2.70935	2.71148	3.45883	9.50629e-06
AT1G49380	0.858404	0.858574	5.3752	6.37196e-06
AT1G49490	0.870436	0.872859	1.44283	0.00592017
AT1G49510	0.737331	0.737536	4.83974	2.815e-05
AT1G49530	0.965145	0.967419	1.18724	0.00272032
AT1G49540	0.491614	0.491754	4.45846	0.0143745
AT1G49600	0.48624	0.486261	7.2258	0.00543007
AT1G49630	1.08734	1.08756	5.17609	2.4139e-07
AT1G49640	2.23091	2.36749	-1.19554	0.0167307
AT1G49650	2.16115	2.16281	3.21438	7.40793e-08
AT1G49730	1.1773	1.17765	4.6895	6.34664e-07
AT1G49750	1.62466	1.62486	5.88949	4.1841e-10
AT1G49760	0.618337	0.618359	7.51644	0.00181962
AT1G49860	2.83364	2.83701	3.42091	1.58863e-08
AT1G49975	1.31392	1.31445	4.44437	0.000619519
AT1G49990	1.37516	1.37823	1.47965	0.0023202
AT1G50000	0.718566	0.719476	2.44398	0.00314809
AT1G50140	0.417135	0.417194	5.52888	0.020467
AT1G50170	0.650993	0.651209	4.392	0.000651015
AT1G50180	1.34096	1.34211	3.04977	1.58546e-07
AT1G50200	0.658195	0.658211	8.15012	0.000116455
AT1G50250	0.96773	0.967754	8.39533	4.09883e-05
AT1G50260	0.487613	0.487784	4.10074	0.00710036
AT1G50290	1.03392	1.03457	3.26162	2.50991e-05
AT1G50320	0.938799	0.938867	6.81181	0.000136034
AT1G50380	0.423131	0.423188	5.50686	0.0140257
AT1G50400	1.77773	1.78417	0.754503	8.18262e-05
AT1G50450	1.15534	1.15556	5.56339	4.97762e-06
AT1G50840	0.966682	0.966821	5.92789	6.62461e-08
AT1G50900	1.49516	1.49537	6.1716	1.65279e-06
AT1G50910	0.641468	0.642461	2.08399	0.0206405
AT1G50920	0.761258	0.761288	7.46827	0.00016766
AT1G50970	0.958581	0.959048	3.42245	4.27543e-05
AT1G51080	1.3228	1.32447	2.78062	3.08502e-06
AT1G51100	1.40587	1.40678	3.96759	2.75622e-06
AT1G51110	1.25187	1.25202	6.09684	3.31117e-06
AT1G51200	0.46566	0.46567	8.01399	0.022654
AT1G51270	0.734303	0.734809	3.23323	0.00560554
AT1G51310	1.40749	1.40814	4.20953	7.27161e-09
AT1G51350	0.507321	0.507456	4.70073	0.0087061
AT1G51360	0.799042	0.799511	3.35267	0.000597071
AT1G51370	0.576359	0.577064	2.37915	0.0203367
AT1G51405	1.05284	1.05584	1.4425	0.000941349
AT1G51460	2.15743	2.16588	1.42682	4.65357e-05
AT1G51500	0.650542	0.650584	6.82351	8.88975e-05
AT1G51580	0.771284	0.771612	4.17915	6.89116e-06
AT1G51730	0.967429	0.967546	5.71771	6.63341e-07
AT1G51805	0.772174	0.772241	6.25502	0.000211174
AT1G51950	0.48587	0.485949	5.30629	0.00943351
AT1G51965	0.602201	0.602541	3.36644	0.0104525
AT1G52000	1.24138	1.24167	4.16545	5.2278e-05
AT1G52040	1.58812	1.59524	0.439501	0.00136797
AT1G52100	2.60752	2.60772	6.71533	1.98201e-09
AT1G52130	5.51435	5.75938	-0.912981	5.43993e-06
AT1G52290	0.709024	0.70943	3.86379	0.00415663
AT1G52310	0.564836	0.564933	5.07824	0.000356249
AT1G52315	1.40407	1.40758	1.21878	0.000869455
AT1G52342	1.58993	1.59037	4.77813	5.0012e-06
AT1G52370	0.713173	0.713408	4.0494	0.000906769
AT1G52430	1.40882	1.41639	0.0969607	0.00876419
AT1G52450	1.47527	1.4777	1.69919	5.63383e-05
AT1G52500	1.06587	1.06631	3.84773	3.68985e-05
AT1G52510	1.08881	1.0889	6.60795	2.80733e-05
AT1G52550	1.36417	1.36567	2.88788	7.48493e-05
AT1G52570	1.43698	1.4398	1.70477	9.10425e-05
AT1G52590	0.914672	0.915089	3.95527	5.98953e-05
AT1G52618	0.997188	1.00021	0.899243	0.0101786
AT1G52700	1.19106	1.19425	1.14887	0.000504115
AT1G52710	1.78818	1.789	3.79987	1.31532e-07
AT1G52740	0.667639	0.667675	6.756	7.45529e-05
AT1G52870	2.22169	2.22184	7.39562	1.36019e-07
AT1G52905	1.22494	1.22602	3.1879	2.50907e-06
AT1G52980	0.929524	0.929587	6.69334	1.03213e-05
AT1G53030	1.32544	1.32665	2.78334	2.82552e-05
AT1G53090	1.14767	1.14781	5.69418	6.68354e-07
AT1G53120	0.887032	0.887457	4.11279	1.30411e-06
AT1G53160	1.46677	1.47762	0.703383	0.000655119
AT1G53200	1.27072	1.2716	3.3964	6.76416e-07
AT1G53250	1.50357	1.5062	2.48848	3.63677e-06
AT1G53350	1.51698	1.51818	3.02391	2.04522e-06
AT1G53390	0.46522	0.465314	4.89282	0.0070442
AT1G53440	0.970186	0.970376	5.02011	3.19199e-06
AT1G53450	0.757624	0.758093	3.38084	0.000726183
AT1G53460	1.13442	1.13498	3.72116	5.3474e-06
AT1G53510	0.543736	0.543792	5.93074	0.000812102
AT1G53520	0.901891	0.902478	4.01148	2.29038e-05
AT1G53640	1.73961	1.7428	1.70222	9.02468e-06
AT1G53670	0.759475	0.759569	6.26218	0.00158226
AT1G53780	1.114	1.11408	6.2254	9.9208e-07
AT1G53790	0.507395	0.507798	2.58643	0.0186711
AT1G53800	1.21556	1.21579	5.42911	1.23766e-06
AT1G53870	2.35681	2.36024	2.61889	1.57941e-08
AT1G53875	1.87651	1.87954	2.22277	8.56128e-05
AT1G53887	1.2256	1.2318	0.10343	0.0228678
AT1G53980	1.58648	1.60836	-0.781801	0.0100353
AT1G53990	1.08649	1.08879	1.89898	0.00192467
AT1G54110	0.583865	0.58477	2.36758	0.0166917
AT1G54250	0.49585	0.496089	3.6112	0.00521933
AT1G54310	1.08324	1.08395	3.59449	1.22805e-05
AT1G54350	0.924427	0.924537	5.93541	1.79194e-05
AT1G54380	0.509098	0.509259	4.2575	0.0116473
AT1G54440	0.511632	0.511797	4.28038	0.00389642
AT1G54500	1.54046	1.54059	6.61473	1.13051e-06
AT1G54520	0.660504	0.66058	6.07054	0.000541811
AT1G54680	1.16479	1.16694	1.86678	0.00202978
AT1G54730	1.0097	1.00994	4.52765	7.66528e-05
AT1G54740	1.17091	1.17119	4.86226	9.66799e-07
AT1G54780	0.967372	0.967402	7.9036	0.000261246
AT1G54820	0.828135	0.828816	3.45152	0.000308968
AT1G55000	1.26842	1.26864	5.03275	1.5733e-06
AT1G55010	2.14846	2.16944	0.183012	5.44261e-05
AT1G55110	0.503864	0.503964	4.63813	0.0069368
AT1G55140	0.753753	0.75421	3.81172	0.00142904
AT1G55152	0.542579	0.542739	4.00783	0.00750808
AT1G55200	1.04603	1.04707	2.60712	0.00139926
AT1G55340	0.502018	0.502157	4.58416	0.00453593
AT1G55350	0.75279	0.752857	6.32021	0.000685782
AT1G55370	0.904794	0.905259	4.08328	0.00119807
AT1G55490	1.43761	1.43764	8.93243	4.24667e-09
AT1G55675	1.29818	1.29873	3.81202	4.77395e-05
AT1G55805	0.869215	0.86951	4.3479	1.62041e-05
AT1G55810	1.04489	1.04506	5.41062	2.94659e-06
AT1G55870	0.486841	0.487058	3.88274	0.0125025
AT1G55910	0.83468	0.834841	5.20713	0.00256064
AT1G55915	0.56557	0.566353	2.38565	0.0178501
AT1G55930	0.921337	0.92173	4.19276	1.51218e-05
AT1G55960	2.09544	2.09553	8.34982	1.5022e-07
AT1G55970	0.984211	0.984737	3.71283	3.4124e-05
AT1G56000	1.03885	1.0391	4.90922	1.8163e-06
AT1G56050	1.14803	1.1483	5.276	9.73273e-08
AT1G56120	1.52766	1.52956	2.16015	3.52914e-06
AT1G56130	1.02464	1.02607	1.90653	0.00022726
AT1G56150	1.2389	1.24099	2.07848	4.79212e-05
AT1G56180	0.835106	0.835302	4.93172	1.68493e-05
AT1G56190	0.666545	0.666575	7.38891	0.000150131
AT1G56200	1.54434	1.54446	6.52702	1.77984e-07
AT1G56220	0.790785	0.790849	6.33039	0.00289259
AT1G56260	0.637536	0.638881	1.78638	0.0233761
AT1G56280	1.02349	1.0235	9.0476	1.39152e-06
AT1G56500	0.744825	0.744873	6.88836	0.00020133
AT1G56510	1.46103	1.46128	5.3954	1.77801e-08
AT1G56520	1.49025	1.49159	3.19316	5.16858e-07
AT1G56570	1.15122	1.15339	1.51873	0.00266028
AT1G56690	1.09999	1.10257	1.32387	0.00122448
AT1G57630	1.12477	1.12753	1.04133	0.0191375
AT1G57660	0.59145	0.591473	7.49101	0.0010293
AT1G57720	0.559663	0.55967	8.77002	0.000740722
AT1G57770	1.66138	1.66162	6.04565	9.86056e-08
AT1G57790	1.97644	1.97868	2.60636	2.36211e-07
AT1G58025	0.558569	0.558716	4.61214	0.00137027
AT1G58110	0.430883	0.430954	5.17109	0.0166516
AT1G58150	1.87238	1.87547	1.98836	2.72565e-07
AT1G58180	0.474245	0.474334	5.03809	0.0159687
AT1G58225	3.08289	3.10941	-0.138565	0.000100349
AT1G58235	1.39153	1.39177	5.03748	2.8197e-08
AT1G58290	0.933232	0.933244	9.08909	3.09031e-05
AT1G58300	1.44832	1.45381	0.103774	0.00572996
AT1G58400	0.643286	0.643643	3.24946	0.0010098
AT1G58520	0.497108	0.497163	6.29095	0.00661401
AT1G58602	1.86367	1.86379	6.80872	1.77358e-09
AT1G58807	1.53504	1.53518	6.37773	1.20407e-10
AT1G58848	1.18352	1.18361	6.60979	5.31521e-08
AT1G59124	1.53504	1.53518	6.37773	1.20407e-10
AT1G59620	1.06158	1.06246	2.87663	0.000441071
AT1G59700	0.866467	0.866633	5.13527	0.000505119
AT1G59720	1.00724	1.00819	2.81561	0.000364511
AT1G59760	0.52308	0.523148	5.65275	0.00109741
AT1G59830	0.528065	0.528163	5.09729	0.00109464
AT1G59900	0.441042	0.441067	6.91346	0.0120728
AT1G59950	3.94509	4.04376	-0.871805	0.000213706
AT1G59990	0.815485	0.815705	4.97021	6.72527e-06
AT1G60000	1.14551	1.14565	6.13802	6.43432e-05
AT1G60060	0.628864	0.629738	2.32648	0.0173013
AT1G60160	0.760429	0.760639	4.46075	0.000155079
AT1G60230	1.2613	1.26183	4.38663	1.67829e-07
AT1G60260	1.52752	1.5279	4.46784	1.60229e-08
AT1G60460	1.65016	1.66074	0.403002	0.000900455
AT1G60470	0.872826	0.873444	2.49369	0.0106709
AT1G60500	0.578887	0.579698	2.09218	0.0126545
AT1G60530	0.564328	0.564703	3.27091	0.0122796
AT1G60550	1.55569	1.55594	6.07798	2.16945e-08
AT1G60590	1.94733	1.94833	4.65023	3.82832e-08
AT1G60600	1.31442	1.31491	4.80201	1.76616e-07
AT1G60730	1.13582	1.13589	6.5608	1.80072e-05
AT1G60740	0.676108	0.677361	2.02617	0.0159434
AT1G60850	0.502004	0.502187	4.16138	0.0116516
AT1G60870	0.584561	0.584655	5.31772	0.0205028
AT1G60950	1.16859	1.16859	10.4731	0.000183473
AT1G60990	0.862442	0.862718	4.49475	0.000102451
AT1G61010	0.430119	0.430191	5.20452	0.0109211
AT1G61120	3.36985	3.43022	-0.912715	0.00110356
AT1G61190	1.27659	1.27674	6.12031	4.98784e-09
AT1G61215	0.751747	0.752495	2.74992	0.00185503
AT1G61280	0.760988	0.762707	1.22855	0.0202967
AT1G61300	1.28065	1.2811	4.68536	1.05993e-06
AT1G61370	0.482656	0.483017	2.87369	0.0173477
AT1G61380	0.693528	0.693665	4.87017	8.21454e-05
AT1G61390	1.2454	1.25147	0.386068	0.0116354
AT1G61400	1.66381	1.66707	1.78696	7.67994e-06
AT1G61420	1.07231	1.07328	2.48876	0.000551117
AT1G61430	1.07963	1.08032	3.16723	7.56141e-05
AT1G61440	1.46301	1.47633	-0.468051	0.00417758
AT1G61460	1.31074	1.31423	1.07177	0.00137337
AT1G61470	1.45881	1.47323	0.0997668	0.0153964
AT1G61500	1.51844	1.51994	2.67623	6.41142e-07
AT1G61610	1.41897	1.44018	-0.108917	0.0210954
AT1G61900	0.493267	0.493342	5.50605	0.00236159
AT1G61970	1.51786	1.51915	2.82213	1.42333e-07
AT1G61980	0.609372	0.609702	3.58214	0.00106215
AT1G62030	0.773385	0.774018	2.78342	0.0004118
AT1G62130	0.950531	0.95109	3.29316	4.29714e-05
AT1G62180	1.35587	1.35589	9.47691	2.70753e-07
AT1G62250	0.964369	0.964741	4.79056	0.000100302
AT1G62260	0.788869	0.790335	1.60842	0.0212281
AT1G62280	2.63545	2.69161	1.23246	0.000210893
AT1G62290	1.87805	1.87961	3.15922	3.44051e-07
AT1G62390	1.00629	1.00634	7.23875	8.07164e-08
AT1G62500	2.20493	2.20552	4.94448	1.01138e-09
AT1G62510	1.82413	1.82513	4.99305	3.93268e-06
AT1G62580	0.982479	0.984112	1.47052	0.00355925
AT1G62630	1.40745	1.40808	4.12774	7.08418e-06
AT1G62750	1.43582	1.43584	9.57613	7.32179e-07
AT1G62780	1.05893	1.05906	6.13034	1.8622e-05
AT1G62850	0.505093	0.50529	4.22028	0.0188143
AT1G62960	0.815993	0.816082	6.23146	1.51712e-05
AT1G63090	0.541149	0.541286	4.65183	0.000708901
AT1G63160	0.654095	0.654532	3.32102	0.00411214
AT1G63180	1.14858	1.1493	3.51509	0.000199386
AT1G63260	0.85536	0.855801	3.92584	1.02817e-05
AT1G63350	1.51996	1.52263	1.98986	9.08411e-06
AT1G63360	1.23884	1.2392	4.89305	4.18495e-05
AT1G63610	0.949937	0.950198	4.82043	1.12893e-05
AT1G63660	0.536678	0.536738	5.87756	0.00750508
AT1G63670	0.610779	0.61099	4.25381	0.000335975
AT1G63680	1.1566	1.15682	5.55705	4.23435e-08
AT1G63770	0.586833	0.586849	7.87764	0.000205843
AT1G63780	0.459165	0.459268	4.90405	0.0228578
AT1G63860	1.36071	1.3621	3.12638	7.42201e-06
AT1G63880	1.22172	1.222	4.82849	9.73611e-06
AT1G63900	0.523778	0.523884	5.09249	0.00308183
AT1G63970	0.657099	0.657216	5.53891	0.00158546
AT1G63980	1.75738	1.75748	7.03631	1.74415e-11
AT1G64110	0.841754	0.842414	2.38474	0.00271238
AT1G64150	1.08813	1.08852	4.49852	8.60285e-06
AT1G64185	1.18995	1.19414	0.907761	0.00468574
AT1G64230	1.31729	1.31732	8.06241	9.66176e-07
AT1G64310	1.67778	1.70104	-0.851431	0.0111122
AT1G64320	1.30988	1.31591	0.325496	0.00286155
AT1G64355	0.827393	0.827665	4.55625	0.000757277
AT1G64430	1.31578	1.31593	6.06559	4.16045e-09
AT1G64500	1.02279	1.02284	7.4264	0.000613698
AT1G64510	1.11151	1.11158	7.45816	9.16139e-05
AT1G64550	0.44522	0.445254	6.53405	0.00503774
AT1G64561	1.98892	1.99379	1.44267	1.46908e-05
AT1G64580	0.51105	0.51153	2.77138	0.0202627
AT1G64680	1.2637	1.2638	6.66784	2.87968e-06
AT1G64710	0.834285	0.834437	4.87201	0.000267225
AT1G64720	1.91727	1.91729	9.90114	8.88516e-07
AT1G64740	0.978151	0.978305	5.55474	1.96922e-05
AT1G64770	1.20403	1.20411	7.1147	8.8737e-06
AT1G64790	0.613937	0.613969	7.12347	0.0206909
AT1G64810	0.5132	0.513369	4.3238	0.0064779
AT1G64860	1.01793	1.01797	7.38506	1.43889e-05
AT1G64960	0.542532	0.542756	3.91263	0.0115915
AT1G65070	1.09368	1.09393	5.04594	2.82942e-07
AT1G65080	0.815838	0.816837	2.53977	0.00196189
AT1G65110	1.93916	1.95172	0.086658	0.00519493
AT1G65190	1.33026	1.33044	5.53123	1.35731e-05
AT1G65230	1.03359	1.03373	5.74045	6.81365e-05
AT1G65260	0.958508	0.958563	7.18972	5.84723e-05
AT1G65280	0.76877	0.768901	5.25828	3.95332e-05
AT1G65346	4.66719	4.79273	-0.849163	2.35117e-05
AT1G65390	1.6666	1.66927	3.38634	0.000491631
AT1G65410	0.433165	0.43331	4.37857	0.0227027
AT1G65420	0.812231	0.81348	2.14058	0.00688572
AT1G65486	1.31621	1.31747	3.00665	1.15694e-05
AT1G65490	2.22156	2.22268	4.84139	4.73246e-07
AT1G65660	0.617001	0.617099	5.30235	0.000150248
AT1G65700	0.51171	0.511998	3.38718	0.0236509
AT1G65790	3.06271	3.1208	-0.588007	0.000715552
AT1G65845	0.995724	0.996285	4.27295	0.000267646
AT1G66100	1.64952	1.64975	5.62474	0.00249274
AT1G66130	1.07132	1.07153	5.34557	5.37795e-05
AT1G66140	0.628216	0.628418	4.23531	0.000245485
AT1G66230	1.14848	1.15154	2.43978	0.000267739
AT1G66330	0.766861	0.766911	6.87137	0.000401379
AT1G66465	1.90441	1.91761	-0.200908	0.00521987
AT1G66520	0.614921	0.615425	3.34511	0.00573033
AT1G66540	1.53547	1.53639	3.91121	5.70766e-07
AT1G66570	3.68263	3.70534	0.622124	0.000155553
AT1G66590	1.33074	1.33232	2.25651	4.24169e-05
AT1G66600	2.90071	2.90944	1.06483	1.63719e-05
AT1G66660	0.612374	0.612993	2.72695	0.00481047
AT1G66670	0.536586	0.536632	6.43608	0.00115884
AT1G66730	0.928802	0.929012	4.66233	4.37497e-06
AT1G66740	0.452068	0.452227	4.07348	0.0148457
AT1G66760	0.438209	0.438235	6.17595	0.0236363
AT1G66820	1.13491	1.13533	4.2571	0.000239095
AT1G66840	1.1865	1.18681	5.03812	7.41825e-07
AT1G66880	0.614948	0.615054	4.95907	0.000469345
AT1G66910	0.839257	0.839915	3.18526	0.00659728
AT1G66920	0.788497	0.789439	2.73834	0.0204351
AT1G66930	1.12427	1.12944	0.528521	0.00419282
AT1G66950	2.33629	2.34133	1.55848	2.3594e-07
AT1G66960	1.46515	1.47184	0.207366	0.00155362
AT1G66970	1.70674	1.70687	6.72592	7.98638e-06
AT1G66980	0.629797	0.629898	5.00625	0.00032282
AT1G67040	0.62973	0.630239	3.24271	0.00337566
AT1G67070	1.41199	1.41265	4.07208	1.57213e-06
AT1G67080	0.637396	0.637574	4.55554	0.00186769
AT1G67090	1.34262	1.34262	13.6403	6.60931e-05
AT1G67120	1.33409	1.33429	5.60291	0.000178918
AT1G67400	0.94783	0.949347	2.17005	0.00284257
AT1G67470	1.16983	1.17091	2.96682	5.69331e-05
AT1G67700	1.09263	1.09269	7.30089	0.000420886
AT1G67830	0.828044	0.828442	3.81936	0.000634806
AT1G67900	0.671075	0.671272	5.26492	0.000130543
AT1G68010	1.3078	1.30782	9.69278	2.03023e-05
AT1G68020	0.501649	0.501755	4.96395	0.00426621
AT1G68110	2.80004	2.81724	0.718403	1.9553e-05
AT1G68120	0.987181	0.991685	0.447899	0.0111274
AT1G68130	0.77869	0.779049	3.96926	4.83727e-05
AT1G68185	0.495854	0.496238	2.96391	0.0133478
AT1G68190	1.58822	1.58981	3.16005	0.000234429
AT1G68260	0.551061	0.551492	3.31948	0.0150205
AT1G68400	0.524447	0.524614	4.56823	0.00538501
AT1G68440	0.626797	0.62682	7.57984	0.00103045
AT1G68520	1.75055	1.751	5.77258	5.56499e-08
AT1G68540	0.622395	0.62301	2.71318	0.0107528
AT1G68550	0.598474	0.598569	5.21187	0.000148061
AT1G68570	0.842855	0.842955	5.74589	8.58292e-05
AT1G68580	0.441433	0.441493	5.61484	0.00613531
AT1G68585	0.681256	0.682444	2.17441	0.00791595
AT1G68590	1.74373	1.7439	6.87373	1.45856e-07
AT1G68730	0.677563	0.678076	3.25722	0.00122046
AT1G68800	2.0451	2.08588	-1.08969	0.00179764
AT1G68830	0.928365	0.928426	6.97711	0.000228251
AT1G68862	0.998967	1.00151	1.23361	0.00469778
AT1G68870	0.667203	0.667994	2.53159	0.00593097
AT1G68890	1.505	1.50528	5.58617	9.55549e-08
AT1G68935	1.54046	1.54816	0.725816	0.00589685
AT1G68940	0.470211	0.470382	3.86761	0.0175165
AT1G68990	0.8393	0.83948	5.13852	0.000354647
AT1G69160	1.83455	1.8351	4.7492	6.33625e-10
AT1G69200	1.45945	1.45987	5.13171	3.37892e-09
AT1G69210	0.576139	0.577038	1.85913	0.0219874
AT1G69220	0.442756	0.442818	5.49135	0.00551679
AT1G69280	0.859184	0.860593	2.05177	0.00126398
AT1G69380	0.644064	0.644666	2.76721	0.00499613
AT1G69523	1.18438	1.18556	3.02468	0.000535985
AT1G69550	1.15498	1.15533	4.60339	1.00594e-06
AT1G69570	0.863824	0.86425	3.74851	4.77708e-05
AT1G69730	1.36892	1.36938	4.63847	2.82869e-06
AT1G69740	0.962235	0.962294	7.17448	1.7277e-06
AT1G69750	0.637003	0.637201	4.21195	0.00018503
AT1G69800	0.613902	0.614068	4.5707	0.000243786
AT1G69840	0.929462	0.929674	4.86046	2.83725e-05
AT1G69935	0.822781	0.823036	4.491	0.00116823
AT1G70020	1.52168	1.54373	-0.525755	0.0195808
AT1G70070	1.00689	1.00711	5.15875	1.47569e-06
AT1G70090	0.515098	0.515159	5.85073	0.000974838
AT1G70100	0.761934	0.76222	4.38399	0.000158016
AT1G70130	2.52516	2.55706	-1.05272	0.00174686
AT1G70150	0.575099	0.575596	2.83588	0.0107424
AT1G70200	1.14519	1.14541	5.53556	5.37249e-07
AT1G70250	0.570889	0.570993	4.98352	0.0014358
AT1G70290	0.631077	0.631165	5.44718	0.000664782
AT1G70310	0.614675	0.614718	6.53053	8.05955e-05
AT1G70350	0.720319	0.720992	2.83147	0.0037899
AT1G70360	0.789338	0.790444	1.94964	0.00177312
AT1G70480	0.62819	0.628336	4.97456	0.000165723
AT1G70510	0.991909	0.995676	0.833927	0.00936907
AT1G70520	0.595799	0.596	4.11589	0.00184415
AT1G70570	0.62655	0.626631	5.69696	5.71991e-05
AT1G70580	0.606645	0.606707	6.38163	0.00104836
AT1G70610	0.848836	0.848965	5.86379	7.76929e-06
AT1G70620	0.806335	0.806389	6.34151	0.00286822
AT1G70660	0.538055	0.538105	6.16624	0.00231379
AT1G70700	1.78529	1.78552	6.05799	4.85545e-08
AT1G70760	0.886797	0.886866	6.59403	0.000894431
AT1G70820	1.04935	1.05072	2.71521	0.000711339
AT1G71030	2.38814	2.39198	3.62689	6.83594e-07
AT1G71040	0.417341	0.417395	5.65128	0.0188689
AT1G71080	0.90809	0.908208	5.48085	1.77926e-06
AT1G71140	0.717598	0.718428	2.40193	0.0193201
AT1G71180	0.547317	0.547661	3.31305	0.00703423
AT1G71260	0.651207	0.651361	4.70216	0.000552134
AT1G71280	3.28949	3.32476	-0.179888	6.39433e-07
AT1G71330	1.55744	1.56066	1.80289	3.60947e-05
AT1G71340	0.87434	0.87447	5.35412	1.72941e-06
AT1G71460	1.09706	1.09803	2.95045	3.31197e-06
AT1G71480	0.721591	0.721701	5.46486	0.00547163
AT1G71490	1.68321	1.68523	2.36177	1.13318e-07
AT1G71500	1.79972	1.79979	7.96101	7.15823e-08
AT1G71710	0.556474	0.556632	4.60656	0.00120616
AT1G71720	1.54273	1.54315	5.13205	1.68657e-07
AT1G71730	1.27497	1.27515	5.47383	1.57906e-09
AT1G71810	0.614519	0.614635	5.17989	0.00133777
AT1G71866	2.0392	2.09704	-0.971551	0.0119003
AT1G71890	4.9874	5.43797	0.804641	7.55242e-06
AT1G71970	0.542381	0.542726	3.70687	0.0107656
AT1G71990	1.15193	1.15311	2.41629	0.000154494
AT1G72010	0.878351	0.87852	5.02442	3.05786e-05
AT1G72030	1.07623	1.07648	4.92406	1.93925e-06
AT1G72040	1.15566	1.15579	6.12518	2.0916e-08
AT1G72060	1.55956	1.562	1.95916	0.000370018
AT1G72090	0.625364	0.625491	5.17677	0.000395126
AT1G72275	1.0642	1.06539	2.83856	6.70338e-05
AT1G72330	0.764238	0.764408	4.30759	0.000618403
AT1G72360	0.948246	0.949033	2.82624	0.000252351
AT1G72410	1.1827	1.18283	5.82949	2.47101e-07
AT1G72430	1.16397	1.16413	6.3607	1.95772e-05
AT1G72450	1.00007	1.00028	5.18128	6.30742e-05
AT1G72540	0.963009	0.965443	0.957663	0.00314572
AT1G72610	0.828	0.828008	9.61359	0.00560164
AT1G72640	1.26265	1.26299	5.11909	6.69542e-07
AT1G72645	2.7072	2.70842	4.53932	6.7712e-09
AT1G72680	0.628944	0.62902	5.50121	0.0025378
AT1G72740	0.670009	0.670173	4.72931	0.000243001
AT1G72750	0.488379	0.488417	6.32928	0.0034897
AT1G72820	0.78207	0.782357	4.45721	0.000188851
AT1G72910	1.68735	1.68938	3.60831	4.48883e-05
AT1G72920	1.14839	1.15018	2.77439	0.00205007
AT1G72930	2.24543	2.24584	5.81074	1.93951e-09
AT1G72940	1.38738	1.38801	4.05129	1.47249e-05
AT1G72970	0.465021	0.465076	6.3576	0.00651748
AT1G73060	0.946513	0.946601	6.45808	8.50419e-05
AT1G73066	2.29405	2.30681	0.330227	0.00010524
AT1G73090	0.919906	0.920438	3.64984	7.11224e-05
AT1G73110	1.17951	1.17973	5.51508	2.69287e-05
AT1G73180	0.780573	0.780684	5.50335	1.09468e-05
AT1G73310	0.546198	0.546662	2.99273	0.00895799
AT1G73470	0.516766	0.517045	3.72024	0.00550699
AT1G73480	0.875498	0.875678	4.72941	0.000786227
AT1G73490	0.430697	0.43076	5.53578	0.0148884
AT1G73530	1.03433	1.03493	4.03141	3.14455e-05
AT1G73600	0.729299	0.72958	6.68358	0.000450175
AT1G73650	0.875841	0.875929	6.14377	7.59425e-05
AT1G73655	1.2368	1.23706	5.23263	9.1766e-05
AT1G73660	0.686214	0.686302	5.99466	1.60532e-05
AT1G73805	1.67046	1.67246	1.98729	0.000298003
AT1G73840	0.452844	0.452933	4.99511	0.0178485
AT1G73885	1.40871	1.40877	7.49411	2.31246e-05
AT1G73890	1.89152	1.90196	0.943466	0.00126968
AT1G73920	0.710444	0.710541	5.80632	0.000108841
AT1G73990	0.819842	0.819919	6.30855	1.6474e-06
AT1G74040	0.945618	0.945804	5.22157	4.53101e-07
AT1G74050	0.816076	0.816098	7.87256	4.67011e-06
AT1G74070	1.26328	1.26358	5.1954	5.0431e-06
AT1G74170	1.12841	1.12899	3.58054	1.04202e-05
AT1G74180	1.2451	1.24634	2.69773	3.18152e-05
AT1G74250	0.932423	0.932622	4.97835	8.38697e-07
AT1G74290	1.68833	1.69306	1.39215	0.000691605
AT1G74370	1.83597	1.83735	3.74069	8.63317e-09
AT1G74400	0.958405	0.963598	-0.118979	0.0216967
AT1G74430	1.32687	1.33102	1.68433	0.000917361
AT1G74470	1.04448	1.04448	10.3839	0.000521933
AT1G74530	0.439249	0.439403	4.27599	0.0203288
AT1G74540	1.29337	1.30258	-0.0333581	0.0071441
AT1G74640	0.452946	0.453061	4.89242	0.0208377
AT1G74710	0.691188	0.691294	4.7836	0.000130175
AT1G74720	0.597404	0.597495	5.44221	7.98772e-05
AT1G74730	0.997366	0.997444	6.93409	0.000204873
AT1G74850	1.36789	1.36819	5.4837	8.21113e-09
AT1G74910	0.443007	0.44304	6.6155	0.00882608
AT1G74960	0.661172	0.661207	7.23822	2.1796e-05
AT1G74970	1.36585	1.36593	7.51896	2.24644e-06
AT1G75010	0.881099	0.881419	4.1442	1.76502e-05
AT1G75100	1.48412	1.48436	6.07189	1.07114e-06
AT1G75120	0.533691	0.534022	3.29652	0.0235649
AT1G75125	0.986528	0.989493	0.977972	0.0236463
AT1G75130	0.622737	0.622893	4.4952	0.000177769
AT1G75180	1.18614	1.18633	5.36461	1.54087e-07
AT1G75190	2.07439	2.08078	1.26052	5.37011e-06
AT1G75240	0.992466	0.992726	4.85754	4.46334e-05
AT1G75280	0.842945	0.842986	7.2212	0.000330053
AT1G75300	0.804452	0.804902	3.308	0.000144367
AT1G75350	1.13095	1.13102	7.26486	4.45871e-05
AT1G75430	1.38385	1.39467	-0.24057	0.0142249
AT1G75460	1.4939	1.49407	6.1714	3.42262e-06
AT1G75490	2.86214	2.87725	0.968086	3.88203e-06
AT1G75520	0.830329	0.83206	1.67568	0.002791
AT1G75660	0.700797	0.700845	6.56349	3.51536e-05
AT1G75690	1.36079	1.36094	6.56853	3.75395e-05
AT1G75770	0.927802	0.92874	2.73118	8.38784e-05
AT1G75860	0.694648	0.694897	4.03255	0.000318014
AT1G75890	1.19371	1.20083	0.0524395	0.00880068
AT1G75900	0.614034	0.614832	2.52614	0.0163458
AT1G75960	1.41609	1.42082	1.3154	0.000103532
AT1G76010	0.819883	0.819911	7.72373	9.59399e-06
AT1G76050	0.883199	0.883534	4.24082	2.19043e-05
AT1G76080	0.503491	0.503507	7.87821	0.0186348
AT1G76110	1.5521	1.55308	4.29265	1.23457e-07
AT1G76120	0.683511	0.683932	3.60117	0.000596794
AT1G76130	0.717852	0.71813	4.27818	0.000301107
AT1G76405	0.636311	0.636893	3.42942	0.00544347
AT1G76450	1.17957	1.17972	6.17706	9.97065e-05
AT1G76530	2.03348	2.03657	1.94626	2.0744e-05
AT1G76570	0.969306	0.969486	5.25882	0.000285741
AT1G76720	1.25831	1.25939	2.78336	2.21573e-05
AT1G76730	1.01779	1.01801	5.18728	8.25967e-06
AT1G76780	1.20499	1.20797	1.4597	0.00136754
AT1G76820	0.883471	0.884219	2.92637	0.000203837
AT1G76930	0.845121	0.845144	8.38243	0.00132677
AT1G77030	0.58054	0.580639	5.35449	0.0130405
AT1G77060	1.65796	1.65871	4.45502	3.93512e-07
AT1G77090	1.0253	1.02551	5.31641	2.30626e-05
AT1G77120	1.54539	1.54584	4.88123	0.000547719
AT1G77122	0.751534	0.751961	3.84787	0.00340622
AT1G77180	0.555964	0.555993	6.86165	0.00102579
AT1G77210	0.666226	0.666999	2.24137	0.0183394
AT1G77240	5.78052	5.87806	0.974338	6.57413e-05
AT1G77405	1.23967	1.24665	0.0900912	0.0067816
AT1G77490	1.48279	1.48296	6.32812	2.77711e-06
AT1G77630	0.461935	0.462202	3.65784	0.0204192
AT1G77670	0.67744	0.677537	5.40209	1.12116e-05
AT1G77720	0.774747	0.775259	3.32719	0.00318884
AT1G77990	1.02845	1.02886	4.03011	2.51173e-06
AT1G78010	1.36837	1.36883	4.53114	2.71665e-07
AT1G78140	1.07889	1.07912	5.25896	3.40835e-06
AT1G78180	0.797103	0.79752	4.07477	0.000226728
AT1G78200	0.496255	0.496421	4.41303	0.00864784
AT1G78230	1.07334	1.07377	4.75225	8.52128e-05
AT1G78270	1.00085	1.00129	3.8991	0.000340476
AT1G78290	0.876181	0.876332	5.24706	0.000107127
AT1G78360	1.54587	1.56211	-0.993983	0.0072219
AT1G78450	2.24643	2.25411	1.62142	2.9819e-06
AT1G78460	2.60928	2.61049	4.15248	5.46596e-08
AT1G78510	1.13466	1.13472	7.19293	4.3766e-06
AT1G78630	1.07176	1.0718	8.0813	6.88441e-05
AT1G78750	2.51143	2.54847	-0.492748	0.000293735
AT1G78780	0.586678	0.587334	2.32185	0.0174583
AT1G78820	1.19807	1.19827	5.60898	2.12178e-06
AT1G78910	0.903017	0.904093	2.39137	8.16141e-05
AT1G78930	0.998757	1.00026	2.34172	0.000638876
AT1G78960	1.65395	1.65467	3.78437	3.81617e-09
AT1G78995	1.79232	1.79337	3.65045	1.07062e-06
AT1G79050	0.647788	0.647934	5.01049	0.000212278
AT1G79080	0.643698	0.64406	3.63972	0.00127167
AT1G79190	0.716324	0.716616	4.02898	0.00475624
AT1G79220	0.751376	0.752507	2.03466	0.00612217
AT1G79280	0.564252	0.564295	6.50111	0.00920449
AT1G79490	0.700612	0.701022	3.40087	0.00825233
AT1G79510	0.936816	0.936961	5.65802	3.55541e-05
AT1G79540	0.60625	0.606596	3.5082	0.00205532
AT1G79560	0.947601	0.947699	6.12987	5.45453e-07
AT1G79600	0.855339	0.855388	7.13994	5.79193e-05
AT1G79700	1.00262	1.00323	3.51928	8.6956e-05
AT1G79780	1.7801	1.78975	0.241535	0.000154392
AT1G79850	1.1234	1.12345	7.54115	6.77928e-06
AT1G79950	0.677335	0.677466	4.94879	0.000785995
AT1G80030	0.92254	0.92265	6.11089	5.78619e-07
AT1G80050	0.748477	0.748779	4.21587	0.000180428
AT1G80060	0.634594	0.635703	1.7407	0.0229865
AT1G80070	0.580329	0.580345	7.91006	0.0130425
AT1G80080	0.939858	0.940189	4.28746	0.000180795
AT1G80150	0.79252	0.793201	2.91393	0.00246139
AT1G80180	1.0031	1.00326	5.64414	0.00223911
AT1G80190	0.63151	0.632125	2.87453	0.00463428
AT1G80245	0.776343	0.777222	2.62303	0.00439547
AT1G80260	0.542472	0.542552	5.32691	0.00224671
AT1G80380	1.31016	1.31022	7.81255	1.15268e-06
AT1G80420	0.799432	0.799775	3.82457	6.5326e-05
AT1G80440	2.97489	2.97697	4.20459	2.2839e-09
AT1G80480	1.20134	1.20157	5.12709	1.93123e-08
AT1G80560	0.630383	0.630462	5.64729	0.000229746
AT1G80570	0.646404	0.647051	2.38467	0.00232576
AT1G80600	0.518622	0.518658	6.57532	0.00207423
AT1G80620	0.66741	0.667531	5.16166	0.000156417
AT1G80640	0.898025	0.898199	5.39451	0.000194256
AT1G80650	1.30686	1.30845	2.71356	3.38899e-05
AT1G80770	0.861691	0.861915	5.01837	2.89285e-06
AT1G80780	0.749874	0.749932	6.32346	8.53455e-06
AT1G80850	0.711828	0.712454	2.92708	0.000436711
AT1G80980	0.741898	0.742534	2.71112	0.000472352
AT2G01008	2.76432	2.76552	3.87661	1.16162e-09
AT2G01021	2.64309	2.64319	7.5509	4.2841e-08
AT2G01023	2.71713	2.7204	2.4169	1.06026e-07
AT2G01060	0.397449	0.397507	5.30732	0.0208723
AT2G01080	0.503601	0.503881	3.39254	0.0233049
AT2G01090	0.782391	0.78298	3.16837	0.000333774
AT2G01110	0.933624	0.933709	6.50066	5.9906e-05
AT2G01130	0.660148	0.660289	4.59446	0.0032796
AT2G01270	0.490037	0.490091	5.75419	0.000541149
AT2G01280	2.09556	2.11414	0.394746	0.000759264
AT2G01290	1.42045	1.42059	6.33328	2.83771e-06
AT2G01320	1.31082	1.31097	5.99228	6.60776e-07
AT2G01390	0.888954	0.891176	1.15051	0.00770099
AT2G01440	0.766064	0.766219	4.97941	2.64301e-06
AT2G01570	0.466374	0.466406	6.69176	0.00429188
AT2G01590	1.34514	1.34555	4.92338	2.4435e-06
AT2G01620	0.653595	0.653856	4.11838	0.00468996
AT2G01730	0.868813	0.871524	0.831088	0.0043631
AT2G01755	1.51697	1.51891	2.78096	1.44779e-05
AT2G01850	1.14259	1.14265	7.15553	2.73612e-07
AT2G01860	3.0788	3.08154	3.69986	1.11158e-09
AT2G01870	0.832267	0.833381	2.68393	0.00712905
AT2G01913	0.890187	0.891955	1.88064	0.00281864
AT2G02010	0.841653	0.841887	3.97348	0.00449127
AT2G02070	0.806421	0.806671	4.7754	1.70203e-05
AT2G02080	0.967664	0.968133	4.12446	0.000709925
AT2G02160	1.00416	1.00422	6.71815	5.15917e-07
AT2G02410	0.876198	0.876565	3.90496	0.000200557
AT2G02450	1.06498	1.066	2.96964	5.85937e-05
AT2G02540	0.866514	0.868394	1.58724	0.00477493
AT2G02710	1.56862	1.56899	5.01019	3.53537e-08
AT2G02740	0.92885	0.929439	3.82589	1.55082e-05
AT2G02750	1.01719	1.02087	0.758003	0.00544771
AT2G02760	0.572797	0.572847	6.06254	0.000379515
AT2G02765	1.38845	1.38939	3.21264	1.31306e-07
AT2G02955	1.11319	1.11392	3.38179	6.71212e-06
AT2G02980	1.36394	1.3664	1.99602	2.10602e-05
AT2G03050	0.788035	0.789219	2.31509	0.00125819
AT2G03070	0.508599	0.508745	4.4288	0.00644808
AT2G03140	0.465802	0.465869	5.5755	0.0122728
AT2G03310	1.26002	1.26333	1.93828	6.66011e-05
AT2G03380	1.2885	1.29238	0.899707	0.000202896
AT2G03390	0.859172	0.859297	5.72315	5.41822e-06
AT2G03420	1.00445	1.00484	4.31501	1.7456e-05
AT2G03530	1.46831	1.46967	2.7881	3.87522e-06
AT2G03550	0.863313	0.863574	4.58903	0.00314727
AT2G03750	1.35515	1.35568	4.50284	5.18963e-06
AT2G03760	1.01894	1.01904	5.74741	0.00157604
AT2G03780	0.5544	0.554638	4.00282	0.0029355
AT2G03820	1.02543	1.02552	6.44427	5.35527e-07
AT2G03980	1.01896	1.01925	4.51287	4.90197e-06
AT2G04030	1.29452	1.29456	8.38102	2.68513e-07
AT2G04039	1.12672	1.12687	6.04554	6.86555e-05
AT2G04040	2.4536	2.45379	6.22851	2.18975e-08
AT2G04050	2.08919	2.08933	6.13561	4.02437e-05
AT2G04070	3.45485	3.46271	1.96104	1.42398e-05
AT2G04230	0.709675	0.709952	3.79664	0.000752542
AT2G04270	0.990574	0.990935	4.51565	6.21659e-05
AT2G04360	0.556986	0.55713	4.77536	0.000571011
AT2G04378	0.652894	0.653145	4.03756	0.00119379
AT2G04380	0.69226	0.692504	4.25545	0.000311448
AT2G04450	1.06202	1.06456	1.55272	0.0124856
AT2G04495	2.35897	2.3984	-0.893947	0.00422296
AT2G04530	1.07561	1.07625	3.75138	5.92801e-07
AT2G04700	1.1979	1.19802	6.25738	4.90803e-06
AT2G04740	0.602889	0.603127	4.10796	0.00511143
AT2G04790	1.98622	1.98723	4.04801	4.59657e-07
AT2G04795	1.82281	1.82466	3.55672	2.65657e-06
AT2G04842	0.850283	0.850364	6.42586	3.29376e-05
AT2G04860	0.985405	0.987778	1.07862	0.00684705
AT2G04865	0.466111	0.466226	4.63991	0.020329
AT2G04890	0.791251	0.791613	3.61196	0.000211296
AT2G05185	1.27123	1.273	2.05556	0.000501895
AT2G05310	1.45026	1.45043	6.16119	1.38138e-05
AT2G05380	0.935617	0.935638	8.35105	0.000293764
AT2G05530	8.88098	1.44269e+08	-0.296011	6.26016e-07
AT2G05540	2.90578	2.90659	5.83759	5.23548e-11
AT2G05620	0.991186	0.99124	7.27924	0.00112955
AT2G05915	3.03636	3.07932	0.188668	3.78296e-05
AT2G06010	0.641538	0.641793	4.00994	0.000506769
AT2G06040	1.03203	1.0327	3.34536	0.00108032
AT2G06255	2.2513	2.26291	0.815829	1.44211e-06
AT2G06990	0.654832	0.654913	5.67829	0.000538522
AT2G07180	1.3959	1.39611	5.29335	1.74313e-08
AT2G07599	5.83848	5.86067	2.54763	2.21605e-11
AT2G07613	3.28729	3.35565	-1.27059	0.000167454
AT2G07617	4.2387	4.28953	-0.0537959	8.66548e-07
AT2G07621	4.36896	4.38879	1.29767	6.19183e-09
AT2G07623	5.37246	5.40539	1.52838	5.9758e-11
AT2G07625	5.51371	5.57189	0.876652	3.6637e-08
AT2G07629	3.42513	3.4448	0.457076	3.1068e-06
AT2G07633	4.14231	4.16783	0.707553	1.21856e-07
AT2G07634	5.83753	5.9658	0.14027	1.64646e-07
AT2G07637	6.16637	6.21924	1.64393	2.12116e-10
AT2G07638	4.07755	4.08703	2.03051	1.56655e-10
AT2G07641	2.2628	2.26511	2.35513	2.56526e-08
AT2G07643	5.23937	5.69195	-1.48303	6.1806e-05
AT2G07646	4.98719	5.43776	-1.89326	0.000204909
AT2G07648	6.20821	6.45516	-0.290095	3.33768e-07
AT2G07652	7.60519	7.64638	3.39492	1.22845e-12
AT2G07654	4.08007	4.15169	-0.718686	9.50945e-05
AT2G07656	4.63356	4.75898	-0.870078	2.99036e-05
AT2G07658	4.27906	4.29113	1.86953	1.01748e-09
AT2G07659	4.19973	4.23613	0.31404	1.25746e-05
AT2G07661	5.12509	5.22747	-0.18784	7.85413e-07
AT2G07662	5.68381	5.6882	4.69116	2.17153e-14
AT2G07665	6.35792	6.37641	3.2966	2.60138e-13
AT2G07667	5.27867	5.30266	1.87626	2.70848e-11
AT2G07669	7.51213	7.76093	0.864372	4.67012e-10
AT2G07671	3.03701	3.03847	3.70138	7.64419e-12
AT2G07672	5.20878	5.23273	1.80933	8.75799e-12
AT2G07673	4.05876	4.15793	-1.03875	4.49971e-05
AT2G07674	3.70154	3.70701	2.46303	9.88566e-11
AT2G07676	4.60703	4.65849	0.181473	7.16097e-08
AT2G07678	5.40842	5.42403	2.59372	1.08838e-09
AT2G07681	5.9166	6.04498	0.233757	1.90281e-07
AT2G07684	3.51604	3.53314	0.645394	3.62177e-06
AT2G07687	3.19358	3.21053	0.351628	2.32719e-06
AT2G07689	4.68462	4.71349	1.10025	1.55654e-08
AT2G07691	5.69086	5.85914	-0.29004	2.24848e-07
AT2G07692	4.60569	4.69044	-0.334838	1.03219e-05
AT2G07695	4.17829	4.18858	2.03748	2.35564e-10
AT2G07696	4.04081	4.04963	2.10909	1.24636e-09
AT2G07698	2.41707	2.41928	2.44981	3.21745e-06
AT2G07701	6.57129	6.63012	1.87089	6.54653e-11
AT2G07702	8.56403	8.81348	1.87151	2.07096e-10
AT2G07705	6.31469	6.48408	0.244119	7.92987e-08
AT2G07706	2.27671	2.27702	5.46634	7.98313e-07
AT2G07708	3.69772	3.70998	1.33176	4.87218e-08
AT2G07715	1.92043	1.92209	2.68189	1.9975e-06
AT2G07718	2.56529	2.56649	3.65066	1.20924e-10
AT2G07719	2.6983	2.70715	0.88869	3.31802e-05
AT2G07721	4.82983	4.99556	-1.01519	7.37166e-06
AT2G07722	7.27561	7.28448	5.25669	5.29526e-15
AT2G07724	4.73355	4.80673	-0.134603	1.32237e-06
AT2G07725	4.00365	4.00836	2.97459	4.66776e-11
AT2G07727	3.449	3.45162	3.24743	2.0029e-10
AT2G07728	4.8248	4.84419	1.72683	3.52413e-10
AT2G07732	3.3338	3.40194	-1.27047	0.000449499
AT2G07734	4.21401	4.22777	1.61741	2.55695e-06
AT2G07738	5.49129	5.65912	-0.519847	5.05589e-06
AT2G07739	5.42756	5.43309	4.10546	1.66535e-15
AT2G07741	6.75044	6.80106	2.2791	3.3371e-08
AT2G07749	5.72971	5.7823	1.23563	2.02515e-09
AT2G07751	3.60516	3.61487	1.54637	1.00203e-08
AT2G07771	7.48928	1.44269e+08	-1.47151	3.96082e-05
AT2G07772	4.47103	4.52787	-0.0185525	3.21661e-06
AT2G07773	4.25423	4.29071	0.397052	4.01297e-09
AT2G07774	3.05301	3.05648	2.4939	2.1098e-10
AT2G07775	4.16766	4.20165	0.364004	6.43397e-07
AT2G07776	1.55561	1.56309	-0.0081666	0.000962443
AT2G07777	3.87964	3.88212	3.78091	6.88744e-11
AT2G07779	4.44088	4.45659	1.66987	5.69832e-10
AT2G07785	5.67483	5.76139	0.578272	3.26769e-09
AT2G07787	3.55546	3.57138	0.830236	7.96824e-07
AT2G07795	7.20008	7.66049	-0.166416	4.10492e-07
AT2G07798	4.22253	4.23348	1.98467	9.78716e-09
AT2G07806	4.50472	4.52632	1.29511	1.94772e-09
AT2G07815	4.44019	4.45163	2.11924	5.72277e-10
AT2G07820	7.75431	1.44269e+08	-1.25788	1.17506e-05
AT2G07825	4.37012	4.44253	-0.370687	6.02603e-06
AT2G07827	3.66051	3.69599	-0.187118	3.18236e-06
AT2G07835	5.83045	5.84948	2.73474	8.68685e-14
AT2G09990	0.523422	0.523458	6.53545	0.0021149
AT2G10940	1.02452	1.02454	9.3028	6.34527e-05
AT2G11000	0.576553	0.576692	4.81043	0.00079707
AT2G11035	0.821612	0.823541	1.28663	0.0141685
AT2G11225	0.640552	0.640581	6.9518	0.00171558
AT2G11890	0.496155	0.496222	5.61799	0.0016931
AT2G12170	1.92381	1.93072	0.879443	5.68545e-05
AT2G12905	2.67448	2.74924	-1.29957	0.00808395
AT2G13360	1.87146	1.87148	10.3052	5.02195e-07
AT2G13440	0.852251	0.852427	5.12295	1.13821e-05
AT2G13550	1.24308	1.24444	2.49288	6.18496e-06
AT2G13660	1.49928	1.50093	2.55201	2.43937e-05
AT2G13790	0.610718	0.610821	5.02534	0.000341582
AT2G13810	2.42559	2.4531	-0.681807	6.34727e-05
AT2G13840	0.693515	0.694007	3.07978	0.0039073
AT2G14045	0.655937	0.656157	4.48177	0.000672143
AT2G14050	0.708288	0.709099	2.47381	0.00337009
AT2G14060	1.10012	1.1025	1.67575	0.00977686
AT2G14070	1.22739	1.2422	-0.613104	0.0117592
AT2G14080	1.47201	1.4729	3.77178	3.36567e-06
AT2G14260	0.639944	0.64006	5.1443	0.00041946
AT2G14285	1.30448	1.30552	3.28237	2.81352e-06
AT2G14560	4.24516	4.24913	3.78469	1.12932e-07
AT2G14610	4.69867	4.86388	1.26692	0.0049548
AT2G14660	0.7718	0.772697	2.64806	0.00694406
AT2G14775	1.45806	1.46512	0.327482	0.000862831
AT2G14800	1.69619	1.71591	-0.655479	0.012506
AT2G14880	1.11037	1.11058	5.53768	2.47366e-06
AT2G14910	1.28368	1.28372	7.7825	1.16041e-06
AT2G15020	0.947129	0.9472	6.61866	0.0114455
AT2G15042	2.39205	2.41295	-0.237496	0.000315134
AT2G15050	1.03004	1.03022	5.25372	2.02526e-05
AT2G15080	3.2462	3.25779	2.65137	6.97953e-08
AT2G15090	1.24308	1.24391	3.95888	4.67792e-07
AT2G15130	2.36147	2.36856	1.12014	7.35946e-07
AT2G15580	0.851124	0.851238	5.47385	0.000104393
AT2G15630	0.779333	0.781462	1.03308	0.00985092
AT2G15695	0.535579	0.535693	4.83249	0.00348886
AT2G15820	0.763422	0.763782	4.01079	5.73977e-05
AT2G15880	1.6003	1.60446	1.48475	0.000971338
AT2G15960	2.51808	2.51966	3.56744	6.28703e-07
AT2G15980	0.539077	0.539748	2.31208	0.0168051
AT2G16060	1.57161	1.57212	4.84681	1.07892e-05
AT2G16070	0.489111	0.489232	5.07755	0.011453
AT2G16280	0.413633	0.413661	6.73317	0.0144187
AT2G16365	0.992677	0.992854	5.42659	5.11033e-06
AT2G16400	0.815294	0.815569	4.53162	0.000105287
AT2G16500	0.829131	0.829156	8.19599	1.00306e-05
AT2G16586	3.65211	3.65239	6.88699	2.18385e-13
AT2G16630	0.580946	0.581226	3.69687	0.00102008
AT2G16650	1.99665	1.99726	4.43754	1.84314e-08
AT2G16660	0.86396	0.864152	4.83754	1.05415e-05
AT2G16710	0.504434	0.504637	3.72682	0.00893273
AT2G16780	0.903415	0.903633	4.54818	1.39496e-05
AT2G16940	0.66187	0.661911	6.71998	0.000153345
AT2G17033	1.35846	1.35881	5.00941	3.91163e-08
AT2G17036	1.54827	1.55209	1.14423	0.000469234
AT2G17040	1.85607	1.85969	1.74809	0.000164608
AT2G17240	1.53548	1.53572	5.85133	3.03149e-08
AT2G17450	0.745535	0.745918	3.62252	0.000190172
AT2G17470	1.23038	1.23859	-0.102909	0.00809486
AT2G17510	0.671458	0.671552	5.5523	0.00029708
AT2G17525	0.832389	0.833274	2.39277	0.00472743
AT2G17540	0.444303	0.444463	4.14727	0.0105943
AT2G17640	1.17508	1.17556	3.98276	7.44892e-08
AT2G17695	0.611064	0.61128	4.44139	0.00724258
AT2G17780	1.79813	1.80143	2.79393	3.0058e-06
AT2G17820	0.564383	0.564508	5.31398	0.00150936
AT2G17880	1.70991	1.71332	2.34566	4.91892e-06
AT2G17930	0.623037	0.623084	6.36265	0.018449
AT2G17972	0.915898	0.916355	4.30345	0.000130248
AT2G18120	1.76251	1.76489	2.37877	8.08518e-05
AT2G18180	6.29518	6.75322	-0.400472	2.23287e-05
AT2G18190	6.21099	6.33975	0.617958	1.51687e-06
AT2G18193	1.44065	1.44083	5.21075	8.4647e-05
AT2G18280	1.43269	1.43277	6.89964	8.21884e-08
AT2G18290	0.989469	0.990056	3.66878	0.000213082
AT2G18300	1.66979	1.67103	4.32167	0.000264304
AT2G18390	0.730062	0.730276	4.25276	1.57096e-05
AT2G18560	1.40109	1.40221	3.40917	1.6044e-07
AT2G18700	1.29376	1.29403	5.0712	2.16914e-06
AT2G18710	0.765809	0.765873	6.48639	0.000496322
AT2G18910	0.487901	0.488029	4.62529	0.0122091
AT2G18940	1.05972	1.05993	5.25429	1.11136e-07
AT2G19120	0.60145	0.602163	2.39794	0.0207653
AT2G19260	0.910818	0.911491	3.07545	3.23849e-05
AT2G19280	0.692332	0.692749	3.38748	0.000811725
AT2G19330	1.24214	1.25326	-0.406556	0.0204553
AT2G19385	0.594154	0.594443	3.79425	0.00261139
AT2G19400	0.943446	0.944748	2.32125	0.00159536
AT2G19480	0.542538	0.54256	7.4678	0.000704426
AT2G19540	0.523808	0.523852	6.28329	0.00200503
AT2G19590	0.472129	0.472432	3.35303	0.0133817
AT2G19640	0.514648	0.514834	4.09532	0.00988713
AT2G19650	0.795417	0.79561	4.82802	0.00257287
AT2G19740	0.659252	0.659318	6.05827	0.000174178
AT2G19870	0.633678	0.633822	5.10789	5.96117e-05
AT2G19940	0.63907	0.639154	5.72978	2.31042e-05
AT2G20020	0.860956	0.861133	5.28613	2.97097e-06
AT2G20050	0.576183	0.576246	5.92276	0.000274965
AT2G20180	1.33539	1.3364	3.83185	3.88108e-07
AT2G20250	1.53497	1.54171	1.38305	9.79871e-05
AT2G20270	0.767493	0.767775	4.26038	0.0001206
AT2G20330	0.558675	0.558761	5.4198	0.000333472
AT2G20390	0.473817	0.474022	3.80308	0.019429
AT2G20690	1.2071	1.20737	5.19378	1.40532e-08
AT2G20720	3.01769	3.02059	3.04692	8.94626e-09
AT2G20800	2.4011	2.40267	2.88153	1.91477e-05
AT2G20830	0.591926	0.592065	4.87908	5.51962e-05
AT2G20850	0.848656	0.848973	4.06683	4.03506e-05
AT2G20860	0.756434	0.756477	6.95501	5.96342e-05
AT2G20875	1.443	1.45064	0.576497	0.000833268
AT2G20890	0.999737	0.999766	8.19723	3.37105e-05
AT2G20920	0.50298	0.503046	5.77238	0.0118923
AT2G21080	0.583684	0.583934	3.88746	0.0233515
AT2G21170	0.787075	0.78709	8.60758	2.23655e-05
AT2G21200	1.79929	1.84717	-0.524829	0.01462
AT2G21210	1.38934	1.39023	4.72909	0.000425275
AT2G21220	1.06724	1.07251	0.910112	0.0164955
AT2G21280	1.20751	1.2077	5.78562	1.33058e-05
AT2G21320	0.591341	0.591456	5.20054	0.00903081
AT2G21330	1.18416	1.18416	10.9412	8.14106e-05
AT2G21350	0.856652	0.85916	0.869798	0.0153824
AT2G21385	1.42103	1.42125	5.9757	4.40146e-08
AT2G21440	0.53794	0.538039	5.49125	0.00736107
AT2G21530	1.46467	1.4649	5.71308	1.76066e-06
AT2G21640	2.02787	2.02942	2.9914	1.28304e-05
AT2G21730	2.32197	2.35078	-0.134765	0.000130676
AT2G21770	1.27207	1.28004	0.402779	0.00892349
AT2G21790	0.756392	0.756473	6.12509	0.000459729
AT2G21860	1.52485	1.52518	5.52665	6.77602e-09
AT2G21890	1.55918	1.58471	-0.964427	0.024172
AT2G21900	5.38025	5.42399	1.13375	2.3609e-10
AT2G21950	0.55078	0.55088	5.08314	0.000699497
AT2G21960	1.01024	1.01035	6.25946	9.69026e-05
AT2G22200	0.756494	0.758074	1.43729	0.0170137
AT2G22260	1.00465	1.00638	1.83998	0.000228565
AT2G22360	1.41353	1.41382	5.66184	1.7545e-08
AT2G22420	1.13905	1.13955	3.96194	2.93602e-06
AT2G22450	0.498682	0.498899	3.40899	0.0155606
AT2G22490	0.684947	0.685068	5.03816	2.99273e-05
AT2G22650	0.652962	0.653469	3.15325	0.0026221
AT2G22870	0.701975	0.702418	3.88536	0.000529627
AT2G22910	0.470876	0.471024	4.27108	0.005294
AT2G22980	1.79505	1.79637	3.57935	0.000101832
AT2G22990	1.96449	1.96459	7.59982	9.87326e-05
AT2G23060	1.33783	1.34298	0.473014	0.000366262
AT2G23070	0.421935	0.421959	6.94263	0.00693358
AT2G23170	1.13659	1.13696	3.96176	6.18706e-05
AT2G23200	1.07014	1.07053	4.03266	5.11088e-05
AT2G23390	0.88041	0.880534	5.70264	6.20584e-07
AT2G23420	0.54596	0.546013	6.1712	0.00219055
AT2G23590	1.90244	1.90463	2.45309	3.36786e-08
AT2G23600	1.98284	1.98305	6.84187	1.14205e-06
AT2G23610	0.70292	0.703045	5.46105	2.08535e-05
AT2G23670	1.12605	1.12613	7.00935	1.72358e-05
AT2G23680	0.895892	0.896366	3.23482	0.000924546
AT2G23740	0.640762	0.640895	4.91864	0.000724988
AT2G23760	0.902872	0.903178	4.51266	6.2761e-05
AT2G24020	1.00766	1.0078	6.18852	3.17153e-05
AT2G24060	1.13495	1.13512	5.83753	1.66802e-06
AT2G24090	1.21066	1.21074	7.23413	1.34928e-05
AT2G24100	0.928169	0.928286	5.52769	4.34155e-07
AT2G24120	1.21742	1.21761	5.59957	2.65423e-07
AT2G24280	1.15802	1.15809	6.76648	1.39971e-07
AT2G24395	0.937529	0.938633	3.23413	0.00152412
AT2G24540	0.784823	0.78495	5.29991	0.00163612
AT2G24580	0.534387	0.534481	5.23035	0.00566726
AT2G24645	1.18763	1.19273	1.22646	0.00402156
AT2G24650	0.668105	0.66839	3.97626	0.00531663
AT2G24690	0.47259	0.472778	3.97126	0.0182592
AT2G24700	1.55649	1.55865	2.17781	8.72393e-05
AT2G24762	0.843356	0.843554	4.62542	3.64088e-05
AT2G24790	0.494777	0.494801	7.2225	0.0146762
AT2G24820	1.03951	1.0396	6.66862	6.30329e-06
AT2G24830	0.463714	0.463886	3.95172	0.0208711
AT2G24850	3.60672	3.61018	3.02323	2.70817e-06
AT2G24860	0.898875	0.899214	4.31272	0.00130041
AT2G24945	0.712238	0.712999	2.3349	0.0225695
AT2G25080	2.01879	2.01889	7.90665	1.50146e-06
AT2G25200	2.30282	2.32085	1.23257	3.04498e-06
AT2G25410	4.41156	4.8559	-1.2848	0.000388317
AT2G25510	3.05566	3.05594	6.76077	1.33796e-08
AT2G25605	1.14681	1.14741	3.84522	2.39989e-06
AT2G25660	0.906996	0.907122	5.69362	8.62627e-06
AT2G25670	0.516286	0.516319	6.73441	0.00124604
AT2G25730	1.01912	1.01921	5.72345	6.07606e-05
AT2G25735	1.65357	1.65834	1.69363	4.64042e-05
AT2G25830	0.46438	0.4645	4.90645	0.00887042
AT2G25840	1.33984	1.34017	5.29973	1.58429e-09
AT2G25850	0.688387	0.6885	4.90027	8.3728e-05
AT2G25870	0.860224	0.860314	6.15665	1.23877e-06
AT2G25900	1.47473	1.47539	4.61835	2.2345e-05
AT2G25910	0.670326	0.670385	5.92735	4.47392e-06
AT2G25964	0.799212	0.799669	3.19243	0.000226576
AT2G26010	7.08141	1.44269e+08	1.78952	0.00486602
AT2G26020	5.57114	1.44269e+08	-0.128782	0.00319373
AT2G26030	1.09233	1.09285	3.66443	1.24364e-06
AT2G26070	0.510679	0.511017	3.12815	0.00836423
AT2G26080	0.984743	0.984751	10.1047	1.78473e-05
AT2G26150	1.16689	1.17021	2.17563	0.00307134
AT2G26250	0.974988	0.975019	7.88011	1.05768e-06
AT2G26300	0.463723	0.463762	6.03729	0.00429033
AT2G26330	0.962916	0.963055	5.63167	5.8695e-06
AT2G26340	0.848504	0.848658	5.46834	0.00130727
AT2G26350	0.469634	0.469831	3.72654	0.0102937
AT2G26400	4.18883	4.20439	1.47489	5.02187e-06
AT2G26430	0.613838	0.613932	5.21348	0.000247771
AT2G26470	0.489643	0.489966	3.28956	0.0113856
AT2G26500	1.82176	1.82179	8.889	5.15452e-06
AT2G26540	0.57847	0.578679	4.39099	0.0111527
AT2G26550	0.463082	0.463269	4.33443	0.00735899
AT2G26580	1.20244	1.20298	4.06796	0.000470215
AT2G26740	1.28728	1.28742	6.1182	4.62844e-06
AT2G26790	0.74256	0.743623	2.00694	0.0166983
AT2G26800	0.637344	0.637396	6.35042	0.000136756
AT2G26860	0.526097	0.526411	3.39478	0.00897937
AT2G26900	0.681514	0.681559	6.66889	6.76982e-06
AT2G26910	0.887091	0.887151	6.81273	2.62932e-06
AT2G26930	0.681735	0.681904	4.93479	0.000638554
AT2G26975	1.25997	1.26026	4.99441	6.69624e-05
AT2G27290	0.594882	0.594981	5.60024	0.0187996
AT2G27340	0.83397	0.834514	3.06629	0.000105622
AT2G27385	1.14095	1.14113	5.25616	0.000254421
AT2G27402	1.72584	1.72652	5.16255	7.09596e-08
AT2G27535	4.26696	4.50504	-1.36104	2.18613e-05
AT2G27650	4.02421	4.12325	-1.01628	0.000259153
AT2G27680	0.847934	0.848012	6.62838	0.000130094
AT2G27830	0.946239	0.946467	4.56518	4.07589e-06
AT2G27860	0.465136	0.465148	7.66738	0.00285043
AT2G28000	0.812794	0.812811	8.83164	4.96057e-06
AT2G28100	0.577503	0.57769	4.25348	0.00185221
AT2G28105	0.936209	0.940344	0.972868	0.00821195
AT2G28120	0.99429	0.9954	2.5668	0.000571247
AT2G28190	0.818978	0.818994	8.14121	0.000853259
AT2G28290	0.672801	0.672838	6.84568	0.0124527
AT2G28305	0.494376	0.494477	4.81926	0.0144978
AT2G28380	0.615314	0.61541	5.33671	0.000298514
AT2G28450	1.44858	1.44882	5.55494	3.71391e-08
AT2G28540	0.833551	0.833686	5.34105	1.24787e-05
AT2G28570	0.772527	0.772847	3.85435	0.000174671
AT2G28600	0.562616	0.562734	4.93236	0.00204081
AT2G28605	1.6717	1.6724	4.54078	1.38919e-07
AT2G28630	2.41324	2.4178	2.98243	6.47658e-08
AT2G28700	2.29428	2.32299	-0.170148	0.00176218
AT2G28780	1.07345	1.07406	4.64526	1.58395e-05
AT2G28800	1.00116	1.00119	8.1841	0.000104422
AT2G28815	3.25869	3.27812	0.575221	1.93501e-06
AT2G28840	0.737016	0.737048	6.82839	6.37557e-06
AT2G28880	0.462242	0.462426	4.34472	0.00512175
AT2G28910	0.907643	0.907664	7.99582	5.00433e-06
AT2G28930	1.09736	1.09791	3.77266	6.09548e-07
AT2G29110	2.16997	2.22946	-1.37444	0.00740813
AT2G29120	1.12152	1.12266	3.46056	0.000124718
AT2G29140	0.588983	0.589052	5.5729	0.00164336
AT2G29180	1.4035	1.4039	4.85171	4.02503e-06
AT2G29290	1.70332	1.70391	5.0269	0.000106113
AT2G29300	3.90365	3.93723	1.68864	5.04887e-07
AT2G29310	1.83758	1.84021	3.30718	4.35785e-07
AT2G29320	1.06644	1.06707	3.90068	1.19473e-05
AT2G29340	1.5985	1.59875	5.88325	1.86431e-07
AT2G29360	0.892921	0.893182	5.10246	0.000176866
AT2G29370	2.47936	2.48516	2.45978	2.02892e-06
AT2G29400	1.31078	1.31086	6.65442	8.28506e-09
AT2G29450	0.967183	0.967237	7.06432	5.06761e-05
AT2G29630	1.16308	1.16311	8.24149	2.85441e-06
AT2G29650	0.508711	0.508765	6.42525	0.00825993
AT2G29720	1.72544	1.72658	3.15306	2.31281e-07
AT2G29760	0.654744	0.655299	2.90734	0.00272645
AT2G30000	0.721176	0.721924	2.45812	0.00172994
AT2G30010	0.789458	0.789608	5.21202	0.00701713
AT2G30100	0.683961	0.684103	5.03187	0.000115065
AT2G30150	0.879467	0.879701	4.95944	1.67514e-05
AT2G30160	0.523138	0.523321	4.22068	0.0018283
AT2G30170	1.11435	1.11464	4.95514	3.52366e-05
AT2G30230	0.522821	0.523067	3.74091	0.0186646
AT2G30260	1.00497	1.0051	5.40903	9.62772e-09
AT2G30280	0.766269	0.766759	3.37522	0.000468812
AT2G30320	0.847653	0.848104	3.752	0.000149863
AT2G30390	1.06074	1.06086	6.2466	1.13628e-06
AT2G30420	3.18282	3.24232	-0.397868	9.83344e-05
AT2G30424	1.36164	1.36791	1.08069	0.00141956
AT2G30520	0.97805	0.978062	9.2064	1.28984e-05
AT2G30590	0.473761	0.473894	4.54061	0.00251397
AT2G30660	2.17104	2.18794	-0.442671	0.000407658
AT2G30670	2.42296	2.44396	0.237193	3.58791e-05
AT2G30695	0.655792	0.656071	4.15987	0.00173095
AT2G30780	0.710375	0.710599	4.18171	5.98818e-05
AT2G30950	0.922566	0.922578	9.28103	4.24755e-05
AT2G31060	0.588529	0.588591	5.73635	0.00306013
AT2G31070	0.908124	0.908373	4.93091	4.54505e-05
AT2G31141	2.03773	2.08292	-1.06481	0.0142439
AT2G31150	1.96444	1.96525	4.21595	6.37132e-09
AT2G31170	0.955682	0.956053	4.53786	1.04156e-06
AT2G31280	0.431472	0.431565	4.98164	0.0167818
AT2G31340	0.552875	0.553187	3.41525	0.0217842
AT2G31380	1.10157	1.10163	6.95028	0.000563607
AT2G31400	0.73335	0.733373	7.88185	6.29708e-06
AT2G31410	0.63315	0.633204	6.27962	7.78826e-05
AT2G31450	0.656465	0.656806	3.76997	0.00092226
AT2G31530	0.466269	0.466449	4.24233	0.00833809
AT2G31560	1.09194	1.09216	5.2006	7.63985e-06
AT2G31730	0.717584	0.718314	3.01866	0.000889558
AT2G31740	0.636827	0.636947	5.18755	0.000573366
AT2G31810	1.22373	1.22384	6.55595	1.68462e-08
AT2G31840	0.687439	0.687725	4.28337	0.000556971
AT2G31880	0.82544	0.825534	5.83103	0.00126934
AT2G31890	1.07333	1.07364	4.92164	7.71022e-07
AT2G31970	0.762228	0.762394	4.863	0.00036157
AT2G32100	1.40131	1.40394	2.45689	0.000280403
AT2G32160	1.93513	1.94257	1.40292	0.000447683
AT2G32180	1.98772	1.98961	3.53263	2.11287e-08
AT2G32230	0.916948	0.917077	5.94319	5.86379e-07
AT2G32340	0.837203	0.83846	2.20514	0.00522796
AT2G32415	0.494956	0.49517	3.85726	0.00480075
AT2G32440	0.980472	0.980766	4.548	3.82103e-06
AT2G32480	0.754315	0.754374	6.50609	8.60073e-05
AT2G32487	1.76118	1.76257	2.8273	4.83678e-06
AT2G32500	1.4104	1.411	4.53396	4.73606e-06
AT2G32530	1.75369	1.75388	6.19382	7.56402e-10
AT2G32540	1.76373	1.76396	6.26995	2.36798e-07
AT2G32550	2.85499	2.86838	1.87372	1.70375e-08
AT2G32640	1.22557	1.22593	4.82804	2.13336e-06
AT2G32650	1.70909	1.70987	4.32624	3.43462e-08
AT2G32680	3.95499	3.96379	2.27237	4.0891e-07
AT2G32740	3.51581	3.6353	-0.434831	0.000309813
AT2G32770	1.1583	1.16942	-0.0372923	0.0147206
AT2G33050	0.52754	0.527705	4.26064	0.0139645
AT2G33060	1.22162	1.22297	2.63974	5.34361e-06
AT2G33170	0.733698	0.733844	4.9945	1.54467e-05
AT2G33180	1.83403	1.83484	4.61934	1.96537e-08
AT2G33250	1.65819	1.65846	5.62034	2.89905e-07
AT2G33340	1.45312	1.45317	7.37914	4.94952e-10
AT2G33450	1.10891	1.10903	6.68913	7.14002e-05
AT2G33480	0.506407	0.50653	4.64281	0.00889831
AT2G33500	0.52696	0.527509	2.64246	0.023403
AT2G33600	0.426374	0.42652	4.25514	0.0107986
AT2G33610	0.520081	0.520187	4.85388	0.000615347
AT2G33620	0.577272	0.577469	4.26193	0.00100745
AT2G33740	0.523587	0.523717	4.63868	0.00431833
AT2G33800	1.19337	1.19342	7.95104	5.62302e-05
AT2G33810	1.55036	1.56592	0.184462	0.00333833
AT2G33820	0.611408	0.61197	2.84127	0.00371855
AT2G33830	1.28826	1.28861	5.36475	0.00117185
AT2G33855	1.0526	1.05301	4.52666	0.000116105
AT2G33860	0.620751	0.620987	4.23313	0.000534737
AT2G34060	0.971567	0.972529	3.19105	0.000116725
AT2G34070	0.725849	0.725913	6.20869	2.0043e-05
AT2G34080	0.556956	0.557071	4.65347	0.00168647
AT2G34170	0.478634	0.478822	4.23368	0.016969
AT2G34240	1.638	1.64722	0.0608652	0.00124692
AT2G34310	0.645947	0.64607	5.36801	0.00114064
AT2G34360	1.47313	1.48089	0.0366648	0.0168755
AT2G34390	1.52691	1.53915	0.253527	0.00593085
AT2G34400	1.17466	1.17674	1.72024	0.000989774
AT2G34440	1.96272	1.97534	0.525232	4.32604e-05
AT2G34460	1.11645	1.11656	6.66797	0.000173793
AT2G34510	0.90663	0.906914	4.79786	0.00237161
AT2G34590	0.54604	0.546067	7.15169	0.000890958
AT2G34640	1.17864	1.17891	5.44345	3.47115e-09
AT2G34690	0.517072	0.517134	5.67504	0.00246479
AT2G34750	1.10985	1.10993	6.75938	4.29291e-09
AT2G34860	1.21802	1.21812	6.58086	3.29223e-05
AT2G34900	0.763773	0.763991	4.53672	0.000153525
AT2G34925	1.17814	1.18276	0.750968	0.00655962
AT2G35040	0.706284	0.706336	6.66373	5.06269e-05
AT2G35130	0.930091	0.930438	4.54087	1.90261e-05
AT2G35155	0.495731	0.495915	4.29243	0.00920246
AT2G35240	0.495175	0.495285	4.83483	0.00514258
AT2G35260	0.723115	0.723152	7.27635	0.00144852
AT2G35370	1.04541	1.04543	8.23177	0.000218544
AT2G35390	1.02264	1.02276	6.09154	6.10443e-07
AT2G35410	1.04307	1.04319	6.16774	8.40194e-05
AT2G35420	1.9464	1.95648	0.807281	1.87304e-05
AT2G35430	0.741173	0.742527	1.8881	0.0128281
AT2G35450	0.86363	0.863978	4.22971	3.54663e-05
AT2G35480	0.497802	0.498373	2.38989	0.0222943
AT2G35490	0.586701	0.586752	6.39677	0.0055386
AT2G35500	1.19628	1.19655	5.26084	9.50813e-06
AT2G35580	6.9874	7.23564	0.444043	1.17318e-07
AT2G35660	1.2928	1.29311	5.03121	5.35252e-06
AT2G35720	0.562205	0.562392	4.26118	0.00309896
AT2G35750	1.06432	1.06482	3.68179	9.13033e-05
AT2G35790	0.465659	0.465768	4.7235	0.0103776
AT2G35795	0.729226	0.729479	4.20614	0.000118589
AT2G35800	1.25523	1.25539	6.10328	3.64303e-08
AT2G35820	1.52867	1.52948	3.93204	3.48652e-06
AT2G35830	1.27665	1.2769	5.58983	0.000143841
AT2G35840	0.428341	0.428376	6.35492	0.0110017
AT2G35900	0.468371	0.468544	3.96787	0.0129735
AT2G35920	0.887907	0.888031	5.48567	5.44517e-06
AT2G35960	0.913643	0.913984	4.3495	0.000720211
AT2G36000	1.61298	1.61332	5.49534	3.52968e-08
AT2G36110	2.32797	2.37105	-0.168934	0.00485711
AT2G36130	0.453047	0.453139	4.87856	0.00526447
AT2G36145	1.32233	1.32282	4.72974	2.14062e-05
AT2G36160	0.51369	0.513704	7.79621	0.00517227
AT2G36430	0.744013	0.7445	3.35686	0.0038186
AT2G36460	0.738877	0.738915	6.82397	6.09376e-05
AT2G36590	0.795293	0.795825	3.54663	0.0108774
AT2G36750	1.10187	1.10221	3.87825	0.000110471
AT2G36790	0.920154	0.920403	4.21466	0.00495176
AT2G36800	1.32989	1.33	6.16979	1.19151e-06
AT2G36835	1.15068	1.15087	5.5537	8.84063e-06
AT2G36885	0.810509	0.810682	4.84704	8.44565e-05
AT2G36900	0.946662	0.946932	4.43235	2.65629e-06
AT2G36930	1.71921	1.71938	6.06363	3.54159e-11
AT2G36980	1.08942	1.09303	1.15635	0.010653
AT2G36990	1.31739	1.31754	6.5216	1.4956e-07
AT2G37020	0.593181	0.593441	3.85615	0.000582924
AT2G37025	2.62251	2.63011	2.00308	1.58944e-05
AT2G37200	0.766763	0.766917	4.64856	7.62493e-05
AT2G37220	1.78158	1.78161	9.01337	5.87244e-09
AT2G37310	0.514127	0.514642	2.33488	0.0231031
AT2G37340	1.09093	1.091	6.56406	5.09951e-08
AT2G37410	0.922968	0.923023	6.7386	1.582e-07
AT2G37450	0.912996	0.913272	4.6451	1.31153e-05
AT2G37630	0.667054	0.667163	5.36156	0.000251594
AT2G37660	1.26562	1.2657	7.22877	2.69504e-06
AT2G37690	0.990446	0.990627	5.07666	4.17554e-05
AT2G37760	0.902344	0.902446	5.88921	4.30465e-06
AT2G37770	1.26575	1.26612	4.38065	0.000151589
AT2G37920	1.07151	1.07204	4.03464	7.97589e-05
AT2G38025	0.788356	0.788671	4.42052	0.000197188
AT2G38140	1.21658	1.21669	6.84299	7.85405e-06
AT2G38170	1.19853	1.19857	7.74723	0.000101001
AT2G38185	0.596177	0.596689	2.95042	0.00340499
AT2G38210	0.852797	0.853034	4.8428	0.0109812
AT2G38230	1.6306	1.63063	9.1272	8.87378e-06
AT2G38270	1.1345	1.1347	5.53112	6.79939e-07
AT2G38310	0.85393	0.853972	7.21398	0.000134558
AT2G38330	0.925248	0.925567	4.49303	4.64645e-05
AT2G38370	0.575716	0.576046	3.42357	0.0100997
AT2G38440	0.46595	0.465997	6.00866	0.00623639
AT2G38460	0.734548	0.735389	2.60538	0.000923136
AT2G38530	1.04164	1.04169	6.59667	2.0552e-05
AT2G38820	0.7788	0.779102	3.74229	0.0070201
AT2G38823	1.49008	1.49193	1.9405	6.44386e-05
AT2G38830	1.02432	1.02636	1.59816	0.00294298
AT2G38950	0.610479	0.610584	5.30044	0.000171755
AT2G39000	0.99942	0.999679	4.76272	5.55263e-05
AT2G39030	6.12865	6.20357	1.18525	1.44619e-06
AT2G39080	0.514032	0.514122	5.43427	0.00220584
AT2G39100	0.944324	0.945116	2.85043	7.23509e-05
AT2G39140	1.07735	1.07771	4.47752	1.76021e-05
AT2G39190	1.17847	1.17858	6.41879	2.15183e-08
AT2G39310	1.65091	1.65096	7.78892	2.87036e-09
AT2G39470	1.62183	1.622	6.56622	5.08989e-06
AT2G39560	1.18556	1.18726	2.51344	2.85893e-05
AT2G39570	2.76433	2.76442	7.76679	3.44398e-10
AT2G39580	1.43248	1.43262	5.96315	2.9136e-07
AT2G39650	0.607432	0.607841	3.2092	0.00505913
AT2G39670	1.27711	1.27729	5.94517	2.54816e-09
AT2G39690	0.729078	0.729644	2.93836	0.00325225
AT2G39730	1.45942	1.45942	13.1397	2.29998e-05
AT2G39740	0.584711	0.584936	4.15681	0.00485864
AT2G39760	0.56983	0.569916	5.28685	0.000200956
AT2G39810	0.568454	0.568556	5.19285	0.000528049
AT2G39850	1.19813	1.19954	3.4596	7.03166e-06
AT2G39930	0.419039	0.419112	5.14175	0.021545
AT2G39950	1.02126	1.02142	5.60895	1.4532e-07
AT2G40000	1.79695	1.79711	6.75948	3.06886e-09
AT2G40020	2.02522	2.02639	3.85471	1.43275e-06
AT2G40085	1.24149	1.24586	0.692889	0.00259276
AT2G40100	0.675557	0.675645	5.93254	0.00118091
AT2G40200	1.661	1.66415	2.30093	0.000104115
AT2G40300	1.39435	1.39455	5.39323	2.26591e-08
AT2G40330	1.15236	1.15262	4.67145	2.5221e-06
AT2G40340	0.938719	0.940384	1.28693	0.0211415
AT2G40360	0.793756	0.793802	6.83171	0.000344388
AT2G40400	1.16392	1.164	7.04952	4.53308e-08
AT2G40490	0.642132	0.642188	6.91109	0.000969517
AT2G40520	1.62904	1.63074	3.1203	7.9105e-08
AT2G40540	0.558229	0.558305	5.75841	0.000208182
AT2G40650	0.396401	0.396502	4.76056	0.0192758
AT2G40670	0.934155	0.936457	2.17094	0.00152549
AT2G40690	0.918232	0.919008	3.40846	3.81391e-05
AT2G40710	2.02519	2.05007	-0.56829	0.00377762
AT2G40711	0.83116	0.834261	0.658707	0.0183099
AT2G40715	1.8759	1.88722	0.143478	0.000168148
AT2G40720	1.21086	1.21315	1.58311	4.7625e-05
AT2G40760	0.929108	0.929483	4.18392	0.000178887
AT2G40815	0.615787	0.616292	2.86238	0.00503393
AT2G40850	1.21978	1.22233	1.61287	0.000277888
AT2G40920	0.839816	0.840212	4.04503	0.000134254
AT2G40935	0.603396	0.604012	2.53646	0.00387133
AT2G40960	1.3908	1.39192	3.09486	3.0171e-07
AT2G41080	1.28904	1.29028	2.73193	1.1732e-06
AT2G41090	0.85714	0.857184	7.02769	0.00062712
AT2G41120	0.579538	0.579876	4.00413	0.0167022
AT2G41200	0.717171	0.718188	2.14356	0.0157693
AT2G41210	2.41965	2.42184	3.00429	2.88046e-09
AT2G41250	1.87924	1.87946	6.46427	3.52074e-10
AT2G41260	3.82995	4.06366	-0.559712	0.0110687
AT2G41340	1.81601	1.81999	2.03667	5.7644e-07
AT2G41460	0.641467	0.641865	3.43968	0.00294377
AT2G41500	0.762563	0.762773	4.43668	0.000205871
AT2G41560	1.0226	1.0227	6.47756	0.000655815
AT2G41620	0.870794	0.870889	5.75019	4.2313e-06
AT2G41680	1.25317	1.25324	7.25103	1.58657e-07
AT2G41700	0.507535	0.507594	5.66191	0.00965554
AT2G41710	0.523524	0.523635	4.69594	0.00843099
AT2G41720	0.854381	0.854572	5.13689	1.2656e-06
AT2G41840	0.494488	0.494494	9.02946	0.0106877
AT2G41890	0.464417	0.464597	4.13287	0.0199549
AT2G41905	1.99793	2.00133	2.10069	2.18124e-06
AT2G41940	0.801535	0.801917	4.52785	0.0170902
AT2G41945	0.565246	0.565506	3.7438	0.00926053
AT2G41950	0.625467	0.625851	3.89856	0.00902224
AT2G41980	0.461633	0.461812	4.06465	0.011296
AT2G41990	1.06731	1.07067	2.09185	0.00190611
AT2G42065	3.21271	3.24711	-0.290841	1.12513e-05
AT2G42070	0.670363	0.670556	4.689	9.55529e-05
AT2G42130	0.619846	0.619995	5.03688	0.00290507
AT2G42170	1.88277	1.88505	2.63419	3.03098e-08
AT2G42290	0.753349	0.753879	3.03456	0.000579501
AT2G42330	0.555945	0.55612	3.95801	0.00693152
AT2G42590	0.666094	0.666123	7.34085	0.000216179
AT2G42640	0.921915	0.922923	2.52973	0.000902027
AT2G42650	0.799086	0.799788	2.84885	0.000243246
AT2G42660	0.847325	0.849072	1.35338	0.0098432
AT2G42750	0.60208	0.602138	6.54634	0.0225352
AT2G42770	0.945479	0.945691	5.26854	2.686e-06
AT2G42780	0.464404	0.464483	5.12393	0.00342669
AT2G42810	0.396749	0.396786	6.15167	0.0174813
AT2G42840	1.10896	1.10902	7.31238	3.09543e-06
AT2G42860	1.42137	1.43447	-0.281008	0.00546224
AT2G42920	1.4053	1.40612	3.40847	4.62386e-08
AT2G42940	2.05576	2.07858	-0.678625	0.0106708
AT2G42975	0.694358	0.694616	4.43304	0.00272922
AT2G43030	1.173	1.17305	7.80985	3.46787e-05
AT2G43140	0.829016	0.829238	4.11009	0.000958373
AT2G43180	0.6932	0.693683	3.41308	0.000734747
AT2G43200	0.668506	0.669011	3.17477	0.00161724
AT2G43235	1.01025	1.0106	4.54858	1.02555e-06
AT2G43370	0.716207	0.716772	2.85796	0.000684257
AT2G43530	0.539288	0.539635	2.89226	0.021891
AT2G43540	0.750592	0.750883	3.79882	0.00130847
AT2G43560	1.23508	1.23524	6.26159	1.80208e-05
AT2G43680	0.614688	0.614713	7.27758	0.000627078
AT2G43710	0.523393	0.52341	7.87144	0.00299859
AT2G43720	0.720492	0.721576	1.80286	0.0127252
AT2G43745	1.57384	1.5884	-0.23066	0.00195261
AT2G43750	0.778702	0.778727	7.8309	3.72517e-05
AT2G43770	0.648639	0.648762	5.09314	1.38464e-05
AT2G43820	1.26812	1.26822	6.12851	3.01533e-05
AT2G43930	1.01305	1.0142	2.50745	6.9744e-05
AT2G43945	0.822048	0.822173	5.82761	9.99695e-05
AT2G43970	0.682487	0.682498	8.65206	0.000241324
AT2G44020	0.641371	0.641739	3.42168	0.00137915
AT2G44040	1.06072	1.06106	4.59449	1.78147e-06
AT2G44210	0.914263	0.914424	5.89262	2.68209e-05
AT2G44290	1.24806	1.24843	4.18033	1.51466e-05
AT2G44460	2.57071	2.57141	4.51668	0.000365486
AT2G44570	1.68105	1.69089	0.490671	0.00192849
AT2G44640	1.03283	1.03314	5.05228	1.94253e-07
AT2G44650	0.88107	0.881187	6.07267	1.46771e-06
AT2G44760	0.460638	0.460781	4.57038	0.0103312
AT2G44800	0.76214	0.764403	1.10853	0.0166807
AT2G44870	0.709226	0.709314	5.98523	0.000430318
AT2G44920	1.76388	1.76426	5.50493	2.65612e-05
AT2G44970	0.42026	0.420312	5.57102	0.00770393
AT2G45000	0.839113	0.839295	4.92264	0.00158278
AT2G45030	0.633393	0.633467	5.71329	0.000284077
AT2G45180	1.27353	1.27355	9.22584	0.000274554
AT2G45190	1.04044	1.0409	4.22796	0.000528976
AT2G45210	0.650122	0.650432	3.47049	0.000918509
AT2G45250	0.720693	0.721037	3.7602	0.000263144
AT2G45270	0.760335	0.760661	4.10227	0.000143616
AT2G45280	1.16106	1.16221	2.82625	1.71254e-05
AT2G45340	0.420914	0.420989	5.29934	0.00912137
AT2G45360	1.36701	1.3771	-0.291455	0.00995203
AT2G45380	0.444397	0.444446	5.66772	0.0126979
AT2G45410	2.30421	2.36513	-1.56727	0.00788824
AT2G45440	0.468876	0.468936	5.82159	0.0122266
AT2G45460	0.703749	0.704289	3.11585	0.00476062
AT2G45560	1.18547	1.186	3.83731	5.13284e-07
AT2G45620	0.627671	0.62773	6.01959	6.76014e-05
AT2G45630	1.06247	1.06313	3.44854	0.000153414
AT2G45700	0.545927	0.546049	4.89898	0.00147513
AT2G45740	1.37842	1.37854	6.2327	4.45377e-07
AT2G45770	0.87117	0.871393	5.04394	1.91606e-05
AT2G45850	1.15284	1.15347	3.88846	9.33718e-06
AT2G45950	0.924339	0.924626	4.59384	2.27755e-06
AT2G46050	1.76524	1.7844	-0.618204	0.00419564
AT2G46090	0.446926	0.447082	4.38202	0.0173495
AT2G46100	0.512843	0.512935	5.34576	0.0048431
AT2G46110	0.812379	0.813685	2.35744	0.000556846
AT2G46250	1.06982	1.07017	4.24954	4.84371e-05
AT2G46280	0.932556	0.932592	7.37161	8.25709e-07
AT2G46400	2.02182	2.02365	2.77928	0.000571367
[truncated: 8,262 more rows]

## Sheet: Supplementary Table 7
Shared genes between HPi+Phi and LPi+Phi up and downregulated genes
intersection between HPi+Phi and LPi+Phi upregulated genes	intersection between HPi+Phi and LPi+Phi downregulated genes
AT1G03055	AT1G01120
AT1G04710	AT1G01580
AT1G04870	AT1G01620
AT1G05200	AT1G02340
AT1G06160	AT1G02360
AT1G06720	AT1G02400
AT1G09830	AT1G02575
AT1G10490	AT1G02816
AT1G10657	AT1G03220
AT1G10960	AT1G03550
AT1G11240	AT1G03870
AT1G11850	AT1G04610
AT1G12030	AT1G05300
AT1G13030	AT1G05340
AT1G13245	AT1G05650
AT1G13260	AT1G05660
AT1G14060	AT1G06120
AT1G14840	AT1G06620
AT1G14880	AT1G06760
AT1G15230	AT1G07160
AT1G15250	AT1G07460
AT1G15410	AT1G08320
AT1G15825	AT1G09070
AT1G15830	AT1G09560
AT1G15940	AT1G11460
AT1G18000	AT1G11670
AT1G19340	AT1G13670
AT1G19670	AT1G14170
AT1G19960	AT1G14290
AT1G21250	AT1G14540
AT1G22370	AT1G14550
AT1G23280	AT1G14780
AT1G23390	AT1G14870
AT1G23730	AT1G14920
AT1G24145	AT1G15100
AT1G24147	AT1G15330
AT1G24148	AT1G16120
AT1G24490	AT1G16130
AT1G25440	AT1G16150
AT1G25560	AT1G16930
AT1G26150	AT1G17400
AT1G26540	AT1G17860
AT1G29940	AT1G18390
AT1G31550	AT1G18570
AT1G31580	AT1G19020
AT1G31820	AT1G19770
AT1G31970	AT1G21110
AT1G32580	AT1G21140
AT1G32928	AT1G21310
AT1G34245	AT1G21360
AT1G34570	AT1G22530
AT1G35310	AT1G22550
AT1G35320	AT1G22740
AT1G36370	AT1G23030
AT1G48540	AT1G23760
AT1G48660	AT1G24320
AT1G49640	AT1G25230
AT1G49750	AT1G26440
AT1G49860	AT1G27170
AT1G50840	AT1G27730
AT1G50910	AT1G29300
AT1G51500	AT1G29330
AT1G51805	AT1G30040
AT1G52040	AT1G30130
AT1G52700	AT1G30700
AT1G54820	AT1G30840
AT1G58225	AT1G30990
AT1G58520	AT1G31130
AT1G60590	AT1G31885
AT1G60850	AT1G33760
AT1G61610	AT1G34370
AT1G62130	AT1G34760
AT1G63660	AT1G35670
AT1G64110	AT1G44020
AT1G64710	AT1G45145
AT1G65080	AT1G49030
AT1G66920	AT1G49960
AT1G66980	AT1G50520
AT1G67900	AT1G51480
AT1G68520	AT1G51860
AT1G68570	AT1G51880
AT1G68990	AT1G52540
AT1G69160	AT1G52820
AT1G70580	AT1G53610
AT1G70820	AT1G53633
AT1G71030	AT1G53635
AT1G71140	AT1G53680
AT1G71280	AT1G54000
AT1G72030	AT1G57990
AT1G72040	AT1G58037
AT1G72090	AT1G58190
AT1G72930	AT1G58320
AT1G73480	AT1G59580
AT1G73530	AT1G60140
AT1G73600	AT1G60787
AT1G74640	AT1G61130
AT1G75280	AT1G61250
AT1G75900	AT1G61560
AT1G76130	AT1G61590
AT1G77030	AT1G61890
AT1G77670	AT1G62300
AT1G77990	AT1G63550
AT1G78780	AT1G63720
AT1G78930	AT1G64920
AT1G79600	AT1G65970
AT1G80440	AT1G66270
AT2G01008	AT1G66280
AT2G02080	AT1G66460
AT2G03140	AT1G66700
AT2G03310	AT1G67710
AT2G04030	AT1G67810
AT2G05380	AT1G68450
AT2G14070	AT1G68690
AT2G14080	AT1G70170
AT2G14560	AT1G70690
AT2G14610	AT1G70985
AT2G15050	AT1G71697
AT2G15080	AT1G73260
AT2G16660	AT1G73410
AT2G17040	AT1G74080
AT2G17695	AT1G74360
AT2G19385	AT1G74740
AT2G19540	AT1G75000
AT2G19590	AT1G75030
AT2G19870	AT1G76090
AT2G20180	AT1G77330
AT2G21440	AT1G77380
AT2G21790	AT1G77760
AT2G22870	AT1G78070
AT2G23760	AT1G78260
AT2G24120	AT1G78340
AT2G24762	AT1G78390
AT2G24850	AT1G78660
AT2G25200	AT1G78830
AT2G25510	AT1G78850
AT2G25900	AT1G78860
AT2G26010	AT1G80310
AT2G26020	AT1G80460
AT2G26150	AT2G01180
AT2G26900	AT2G03200
AT2G27535	AT2G04430
AT2G28930	AT2G05180
AT2G29120	AT2G14100
AT2G29300	AT2G19060
AT2G29310	AT2G21045
AT2G29320	AT2G21560
AT2G29360	AT2G21840
AT2G29370	AT2G22500
AT2G29650	AT2G22880
AT2G30320	AT2G25090
AT2G30424	AT2G25215
AT2G31060	AT2G25260
AT2G31730	AT2G25460
AT2G31840	AT2G26360
AT2G32100	AT2G26410
AT2G32160	AT2G27080
AT2G32487	AT2G28670
AT2G33050	AT2G28970
AT2G33620	AT2G28990
AT2G35720	AT2G29065
AT2G35840	AT2G29220
AT2G37760	AT2G29740
AT2G37770	AT2G30620
AT2G39030	AT2G30740
AT2G39850	AT2G31020
AT2G40100	AT2G31350
AT2G41090	AT2G32030
AT2G43530	AT2G32300
AT2G44210	AT2G33710
AT2G44460	AT2G34830
AT2G45280	AT2G35000
AT2G45560	AT2G35710
AT2G46100	AT2G35930
AT2G47180	AT2G35980
AT3G01120	AT2G36100
AT3G02830	AT2G36630
AT3G03270	AT2G36970
AT3G03770	AT2G37130
AT3G04870	AT2G37750
AT3G05380	AT2G38470
AT3G05400	AT2G38870
AT3G05650	AT2G39040
AT3G07310	AT2G39180
AT3G07590	AT2G39200
AT3G07750	AT2G39430
AT3G07860	AT2G39518
AT3G08860	AT2G39530
AT3G10450	AT2G40080
AT3G10520	AT2G40095
AT3G10525	AT2G40110
AT3G11470	AT2G41660
AT3G12340	AT2G42060
AT3G12520	AT2G42350
AT3G13470	AT2G43050
AT3G13810	AT2G44010
AT3G14210	AT2G44380
AT3G14620	AT2G44500
AT3G17170	AT2G44790
AT3G17330	AT2G45220
AT3G17930	AT2G45470
AT3G18500	AT2G46150
AT3G18610	AT2G46270
AT3G18850	AT2G46495
AT3G19000	AT2G46500
AT3G20070	AT2G46620
AT3G20470	AT2G46940
AT3G20540	AT2G47460
AT3G21080	AT2G47890
AT3G21720	AT3G01175
AT3G22210	AT3G01190
AT3G22231	AT3G01290
AT3G22235	AT3G01420
AT3G22550	AT3G01760
AT3G22660	AT3G02120
AT3G22890	AT3G02430
AT3G23120	AT3G02880
AT3G23450	AT3G03550
AT3G23580	AT3G04010
AT3G25770	AT3G04060
AT3G26230	AT3G05150
AT3G27660	AT3G05155
AT3G27820	AT3G05200
AT3G28070	AT3G05730
AT3G28270	AT3G06060
AT3G28510	AT3G06300
AT3G28540	AT3G06390
AT3G28930	AT3G07195
AT3G29090	AT3G08720
AT3G29633	AT3G08930
AT3G44290	AT3G09020
AT3G44300	AT3G09220
AT3G44310	AT3G09400
AT3G44860	AT3G09940
AT3G44970	AT3G10500
AT3G45140	AT3G10720
AT3G45160	AT3G10815
AT3G45860	AT3G10986
AT3G46670	AT3G11230
AT3G48830	AT3G11820
AT3G49110	AT3G12040
AT3G49570	AT3G13600
AT3G49580	AT3G13610
AT3G50070	AT3G13710
AT3G50440	AT3G13720
AT3G51000	AT3G13790
AT3G52170	AT3G14260
AT3G53540	AT3G14590
AT3G54460	AT3G15630
AT3G54740	AT3G16670
AT3G55130	AT3G16720
AT3G55290	AT3G18010
AT3G55970	AT3G18450
AT3G56330	AT3G19390
AT3G56400	AT3G19680
AT3G56710	AT3G20410
AT3G57260	AT3G20940
AT3G57460	AT3G21560
AT3G57680	AT3G22460
AT3G58270	AT3G22830
AT3G58470	AT3G23190
AT3G59940	AT3G23800
AT3G60890	AT3G24300
AT4G00620	AT3G24520
AT4G03400	AT3G24540
AT4G03410	AT3G24840
AT4G03450	AT3G25250
AT4G04810	AT3G25950
AT4G04830	AT3G26500
AT4G05070	AT3G26520
AT4G08870	AT3G26610
AT4G08920	AT3G28290
AT4G09350	AT3G28300
AT4G11175	AT3G44710
AT4G12320	AT3G45330
AT4G12500	AT3G45410
AT4G12750	AT3G45700
AT4G13540	AT3G46280
AT4G13550	AT3G46400
AT4G13575	AT3G46620
AT4G13750	AT3G46690
AT4G13810	AT3G47420
AT4G13840	AT3G47730
AT4G14030	AT3G47820
AT4G14400	AT3G48020
AT4G14680	AT3G48850
AT4G15236	AT3G48940
AT4G15530	AT3G49210
AT4G16240	AT3G49530
AT4G16630	AT3G49750
AT4G16860	AT3G49760
AT4G16880	AT3G50140
AT4G16950	AT3G51330
AT4G18390	AT3G51350
AT4G19170	AT3G51360
AT4G21620	AT3G52060
AT4G21940	AT3G52400
AT4G22380	AT3G52450
AT4G22470	AT3G52460
AT4G23060	AT3G52500
AT4G23130	AT3G52800
AT4G23140	AT3G52970
AT4G23150	AT3G53150
AT4G23170	AT3G53400
AT4G23540	AT3G53990
AT4G26190	AT3G54420
AT4G26530	AT3G55150
AT4G26600	AT3G55430
AT4G26700	AT3G56000
AT4G26900	AT3G56110
AT4G27300	AT3G57530
AT4G27340	AT3G58875
AT4G27490	AT3G59120
AT4G27830	AT3G60130
AT4G29020	AT3G61070
AT4G30110	AT3G61230
AT4G31210	AT3G61390
AT4G31330	AT3G62260
AT4G32420	AT3G62720
AT4G32770	AT4G00300
AT4G32920	AT4G01120
AT4G32980	AT4G01350
AT4G33110	AT4G01750
AT4G33220	AT4G01920
AT4G33960	AT4G01950
AT4G33970	AT4G02370
AT4G34060	AT4G02540
AT4G34240	AT4G03190
AT4G34530	AT4G03480
AT4G35640	AT4G04695
AT4G36040	AT4G04990
AT4G37190	AT4G05200
AT4G37670	AT4G08300
AT4G37980	AT4G09110
AT4G38860	AT4G10510
AT4G39250	AT4G11230
AT4G39470	AT4G11320
AT4G39540	AT4G12330
AT5G01410	AT4G12420
AT5G01780	AT4G12545
AT5G03350	AT4G12550
AT5G04895	AT4G14130
AT5G05200	AT4G14368
AT5G05580	AT4G14370
AT5G05990	AT4G14630
AT5G06720	AT4G15160
AT5G07580	AT4G15330
AT5G07670	AT4G15340
AT5G08600	AT4G15400
AT5G08760	AT4G15610
AT5G10760	AT4G15740
AT5G10910	AT4G15800
AT5G12220	AT4G17215
AT5G13400	AT4G17800
AT5G13550	AT4G18940
AT5G14050	AT4G19690
AT5G14970	AT4G20110
AT5G15700	AT4G20170
AT5G16750	AT4G20860
AT5G17270	AT4G21600
AT5G17700	AT4G21830
AT5G17760	AT4G21850
AT5G18820	AT4G22070
AT5G19190	AT4G22230
AT5G19540	AT4G22640
AT5G20670	AT4G22810
AT5G22300	AT4G23190
AT5G22920	AT4G23450
AT5G23070	AT4G23700
AT5G23480	AT4G24230
AT5G24160	AT4G24310
AT5G24210	AT4G25250
AT5G24660	AT4G25390
AT5G24810	AT4G25470
AT5G25130	AT4G26140
AT5G25140	AT4G26470
AT5G25190	AT4G26690
AT5G25630	AT4G26890
AT5G26110	AT4G27280
AT5G26220	AT4G27745
AT5G27030	AT4G28110
AT5G35480	AT4G28940
AT5G35490	AT4G30060
AT5G37360	AT4G30170
AT5G37720	AT4G30270
AT5G38060	AT4G31140
AT5G39790	AT4G31940
AT5G39850	AT4G32290
AT5G40670	AT4G33120
AT5G41410	AT4G33920
AT5G42530	AT4G34000
AT5G42670	AT4G35100
AT5G44190	AT4G35500
AT5G44420	AT4G35750
AT5G44580	AT4G36850
AT5G44680	AT4G37010
AT5G45820	AT4G37070
AT5G45960	AT4G37940
AT5G46100	AT4G37950
AT5G46710	AT4G38390
AT5G47000	AT4G38470
AT5G47650	AT4G38830
AT5G48030	AT4G39090
AT5G48180	AT4G39270
AT5G48850	AT4G40070
AT5G49740	AT5G01040
AT5G49910	AT5G01050
AT5G50130	AT5G01250
AT5G50915	AT5G01280
AT5G51440	AT5G01490
AT5G51540	AT5G01550
AT5G52040	AT5G01710
AT5G52470	AT5G01830
AT5G52640	AT5G02090
AT5G52900	AT5G02170
AT5G54580	AT5G02360
AT5G54585	AT5G02400
AT5G54610	AT5G03553
AT5G54630	AT5G04770
AT5G55280	AT5G05410
AT5G55930	AT5G06200
AT5G57280	AT5G06300
AT5G58610	AT5G06530
AT5G59000	AT5G06740
AT5G59130	AT5G06800
AT5G59320	AT5G06860
AT5G59540	AT5G06900
AT5G61590	AT5G07080
AT5G62370	AT5G07390
AT5G63060	AT5G07440
AT5G64080	AT5G07780
AT5G64680	AT5G08790
AT5G66130	AT5G10100
AT5G67370	AT5G10280
AT5G67480	AT5G10430
	AT5G10435
	AT5G10625
	AT5G10720
	AT5G10740
	AT5G11090
	AT5G11280
	AT5G15130
	AT5G15290
	AT5G15350
	AT5G15950
	AT5G16250
	AT5G17960
	AT5G18860
	AT5G19230
	AT5G19600
	AT5G19860
	AT5G22940
	AT5G23210
	AT5G23830
	AT5G23840
	AT5G24090
	AT5G24100
	AT5G24230
	AT5G24470
	AT5G24590
	AT5G25770
	AT5G25930
	AT5G26010
	AT5G26300
	AT5G26320
	AT5G27420
	AT5G28080
	AT5G35580
	AT5G35940
	AT5G37550
	AT5G37770
	AT5G39580
	AT5G40590
	AT5G40690
	AT5G42180
	AT5G43520
	AT5G43780
	AT5G43830
	AT5G44020
	AT5G44380
	AT5G44460
	AT5G44610
	AT5G44910
	AT5G45000
	AT5G45340
	AT5G46090
	AT5G46890
	AT5G46900
	AT5G47450
	AT5G47590
	AT5G47950
	AT5G49330
	AT5G49870
	AT5G50010
	AT5G50200
	AT5G51160
	AT5G52020
	AT5G53110
	AT5G54230
	AT5G54700
	AT5G55970
	AT5G56870
	AT5G56980
	AT5G56985
	AT5G57480
	AT5G57560
	AT5G57770
	AT5G58430
	AT5G58750
	AT5G59530
	AT5G60270
	AT5G60660
	AT5G62330
	AT5G62340
	AT5G64100
	AT5G64120
	AT5G64260
	AT5G64310
	AT5G64700
	AT5G65390
	AT5G65920
	AT5G66650
	AT5G66675
	AT5G67300

## Sheet: Supplementary Table 8
Enriched GO terms in the up and downregulated differentially expressed genes in HPi+Phi treatment relative to HPi.
Enriched GO Terms in upregulated DEGs of Hpi+Phi vs HPi										Enriched GO Terms in downregulated DEGs of Hpi+Phi vs HPi
	GO.ID	Term	Annotated	Significant	Expected	elimFisher	-logpval'	% of Sig. genes			GO.ID	Term	Annotated	Significant	Expected	elimFisher	-logpval'	% of Sig. genes
1	GO:0009414	response to water deprivation	424	82	32.56	7.9e-14	13.1024	0.193396		1	GO:0071456	cellular response to hypoxia	240	74	16.24	1.3e-29	28.8861	0.308333
2	GO:0019761	glucosinolate biosynthetic process	50	25	3.84	5.8e-13	12.2366	0.5		2	GO:0006952	defense response	1666	221	112.76	1.4e-13	12.8539	0.132653
3	GO:0042026	protein refolding	37	19	2.84	2.8e-12	11.5528	0.513514		3	GO:0006468	protein phosphorylation	1151	153	77.91	2.3e-12	11.6383	0.132928
4	GO:0006364	rRNA processing	285	78	21.89	8.8e-09	8.05552	0.273684		4	GO:0042742	defense response to bacterium	375	65	25.38	9.1e-10	9.04096	0.173333
5	GO:0009611	response to wounding	245	46	18.82	1.3e-08	7.88606	0.187755		5	GO:0010224	response to UV-B	73	20	4.94	4.8e-08	7.31876	0.273973
6	GO:0009651	response to salt stress	463	71	35.56	1.6e-08	7.79588	0.153348		6	GO:0010114	response to red light	67	19	4.53	5.7e-08	7.24413	0.283582
7	GO:0009408	response to heat	270	53	20.74	3.1e-08	7.50864	0.196296		7	GO:0010218	response to far red light	45	15	3.05	1.3e-07	6.88606	0.333333
8	GO:0009751	response to salicylic acid	190	39	14.59	1.6e-07	6.79588	0.205263		8	GO:0007623	circadian rhythm	144	37	9.75	2.6e-07	6.58503	0.256944
9	GO:0009625	response to insect	41	15	3.15	1.7e-07	6.76955	0.365854		9	GO:0009646	response to absence of light	52	15	3.52	1.1e-06	5.95861	0.288462
10	GO:0030490	maturation of SSU-rRNA	56	23	4.3	2.8e-07	6.55284	0.410714		10	GO:0009651	response to salt stress	463	63	31.34	1.9e-06	5.72125	0.136069
11	GO:0009737	response to abscisic acid	603	81	46.31	5.6e-07	6.25181	0.134328		11	GO:0006979	response to oxidative stress	456	72	30.86	5.7e-06	5.24413	0.157895
12	GO:0009753	response to jasmonic acid	236	41	18.12	6.8e-07	6.16749	0.173729		12	GO:0046777	protein autophosphorylation	167	28	11.3	7.5e-06	5.12494	0.167665
13	GO:0051085	chaperone cofactor-dependent protein ref...	47	15	3.61	1.3e-06	5.88606	0.319149		13	GO:0002237	response to molecule of bacterial origin	51	16	3.45	8.2e-06	5.08619	0.313725
14	GO:0010150	leaf senescence	164	31	12.59	2.5e-06	5.60206	0.189024		14	GO:0009611	response to wounding	245	36	16.58	9.3e-06	5.03152	0.146939
15	GO:0009073	aromatic amino acid family biosynthetic ...	56	16	4.3	3e-06	5.52288	0.285714		15	GO:0009409	response to cold	409	56	27.68	1.5e-05	4.82391	0.136919
17	GO:0006457	protein folding	196	50	15.05	3.9e-06	5.40894	0.255102		16	GO:0009620	response to fungus	663	73	44.88	2.1e-05	4.67778	0.110106
16	GO:0009423	chorismate biosynthetic process	11	7	0.84	3.9e-06	5.40894	0.636364		17	GO:0009637	response to blue light	89	18	6.02	2.4e-05	4.61979	0.202247
18	GO:0006979	response to oxidative stress	456	73	35.02	4.1e-06	5.38722	0.160088		18	GO:0010200	response to chitin	22	8	1.49	5.9e-05	4.22915	0.363636
19	GO:0008652	amino acid biosynthetic process	222	55	17.05	4.3e-06	5.36653	0.247748		19	GO:2000028	regulation of photoperiodism, flowering	97	18	6.57	8e-05	4.09691	0.185567
20	GO:0042542	response to hydrogen peroxide	73	18	5.61	7.3e-06	5.13668	0.246575		20	GO:0009626	plant-type hypersensitive response	90	17	6.09	9.9e-05	4.00436	0.188889
21	GO:0050821	protein stabilization	31	11	2.38	1.1e-05	4.95861	0.354839		21	GO:0009751	response to salicylic acid	190	32	12.86	0.0001	4	0.168421
22	GO:2000143	negative regulation of DNA-templated tra...	6	5	0.46	1.5e-05	4.82391	0.833333		24	GO:0009736	cytokinin-activated signaling pathway	91	17	6.16	0.00011	3.95861	0.186813
23	GO:0000462	maturation of SSU-rRNA from tricistronic...	39	12	3	2.2e-05	4.65758	0.307692		23	GO:0005975	carbohydrate metabolic process	1123	116	76.01	0.00011	3.95861	0.103295
24	GO:0030150	protein import into mitochondrial matrix	29	10	2.23	3.6e-05	4.4437	0.344828		22	GO:0007166	cell surface receptor signaling pathway	82	16	5.55	0.00011	3.95861	0.195122
25	GO:0010438	cellular response to sulfur starvation	7	5	0.54	4.9e-05	4.3098	0.714286		25	GO:0009414	response to water deprivation	424	49	28.7	0.00018	3.74473	0.115566
26	GO:0042273	ribosomal large subunit biogenesis	79	20	6.07	5.7e-05	4.24413	0.253165		26	GO:0002239	response to oomycetes	78	15	5.28	0.0002	3.69897	0.192308
29	GO:0018216	peptidyl-arginine methylation	11	6	0.84	6.7e-05	4.17393	0.545455		27	GO:0009759	indole glucosinolate biosynthetic proces...	10	5	0.68	0.00027	3.56864	0.5
28	GO:0000479	endonucleolytic cleavage of tricistronic...	11	6	0.84	6.7e-05	4.17393	0.545455		28	GO:0006880	intracellular sequestering of iron ion	15	6	1.02	0.00028	3.55284	0.4
27	GO:0009615	response to virus	101	24	7.76	6.7e-05	4.17393	0.237624		30	GO:1900424	regulation of defense response to bacter...	56	12	3.79	0.0003	3.52288	0.214286
31	GO:0009098	leucine biosynthetic process	16	7	1.23	9.6e-05	4.01773	0.4375		29	GO:0010187	negative regulation of seed germination	27	8	1.83	0.0003	3.52288	0.296296
30	GO:0035999	tetrahydrofolate interconversion	16	7	1.23	9.6e-05	4.01773	0.4375		31	GO:0098662	inorganic cation transmembrane transport	365	50	24.71	0.00034	3.46852	0.136986
33	GO:0000103	sulfate assimilation	22	8	1.69	0.00014	3.85387	0.363636		32	GO:0010039	response to iron ion	22	7	1.49	0.00044	3.35655	0.318182
32	GO:0009624	response to nematode	82	17	6.3	0.00014	3.85387	0.207317		33	GO:0009873	ethylene-activated signaling pathway	202	27	13.67	0.00055	3.25964	0.133663
34	GO:0005983	starch catabolic process	18	7	1.38	0.00023	3.63827	0.388889		34	GO:0006552	leucine catabolic process	7	4	0.47	0.00062	3.20761	0.571429
35	GO:0006264	mitochondrial DNA replication	9	5	0.69	0.00026	3.58503	0.555556		35	GO:0042752	regulation of circadian rhythm	56	16	3.79	0.00064	3.19382	0.285714
36	GO:0048316	seed development	630	73	48.38	0.00028	3.55284	0.115873		36	GO:0006833	water transport	38	9	2.57	0.00079	3.10237	0.236842
37	GO:0016125	sterol metabolic process	79	16	6.07	0.00029	3.5376	0.202532		37	GO:0098655	monoatomic cation transmembrane transpor...	388	51	26.26	0.00083	3.08092	0.131443
38	GO:0031408	oxylipin biosynthetic process	30	9	2.3	0.0003	3.52288	0.3		38	GO:0009585	red, far-red light phototransduction	55	11	3.72	0.00099	3.00436	0.2
39	GO:0031126	sno(s)RNA 3'-end processing	14	6	1.08	0.00036	3.4437	0.428571		40	GO:0007584	response to nutrient	13	5	0.88	0.00115	2.9393	0.384615
40	GO:0009809	lignin biosynthetic process	51	12	3.92	0.00038	3.42022	0.235294		39	GO:0009938	negative regulation of gibberellic acid ...	13	5	0.88	0.00115	2.9393	0.384615
41	GO:0006970	response to osmotic stress	554	88	42.55	0.0004	3.39794	0.158845		41	GO:0009772	photosynthetic electron transport in pho...	8	4	0.54	0.00117	2.93181	0.5
44	GO:0034758	positive regulation of iron ion transpor...	3	3	0.23	0.00045	3.34679	1		42	GO:0043617	cellular response to sucrose starvation	4	3	0.27	0.00118	2.92812	0.75
43	GO:0033506	glucosinolate biosynthetic process from ...	3	3	0.23	0.00045	3.34679	1		44	GO:0009636	response to toxic substance	330	51	22.34	0.00127	2.8962	0.154545
42	GO:0031120	snRNA pseudouridine synthesis	3	3	0.23	0.00045	3.34679	1		43	GO:0009737	response to abscisic acid	603	68	40.81	0.00127	2.8962	0.112769
47	GO:0051259	protein complex oligomerization	61	16	4.68	0.00046	3.33724	0.262295		46	GO:0010167	response to nitrate	33	8	2.23	0.00131	2.88273	0.242424
46	GO:0080187	floral organ senescence	6	4	0.46	0.00046	3.33724	0.666667		45	GO:0010193	response to ozone	33	8	2.23	0.00131	2.88273	0.242424
45	GO:0009264	deoxyribonucleotide catabolic process	6	4	0.46	0.00046	3.33724	0.666667		47	GO:0009416	response to light stimulus	779	120	52.73	0.00139	2.85699	0.154044
48	GO:0006167	AMP biosynthetic process	10	5	0.77	0.00048	3.31876	0.5		48	GO:0009909	regulation of flower development	153	21	10.36	0.00154	2.81248	0.137255
50	GO:0009086	methionine biosynthetic process	26	8	2	0.00053	3.27572	0.307692		50	GO:0070417	cellular response to cold	34	8	2.3	0.00161	2.79317	0.235294
49	GO:0042435	indole-containing compound biosynthetic ...	60	13	4.61	0.00053	3.27572	0.216667		49	GO:0098739	import across plasma membrane	34	8	2.3	0.00161	2.79317	0.235294
53	GO:0009749	response to glucose	68	14	5.22	0.00056	3.25181	0.205882		51	GO:1990961	xenobiotic detoxification by transmembra...	50	10	3.38	0.00166	2.77989	0.2
52	GO:0098754	detoxification	289	41	22.19	0.00056	3.25181	0.141869		52	GO:0048511	rhythmic process	153	41	10.36	0.00187	2.72816	0.267974
51	GO:1902358	sulfate transmembrane transport	15	6	1.15	0.00056	3.25181	0.4		53	GO:0010119	regulation of stomatal movement	106	16	7.17	0.00202	2.69465	0.150943
54	GO:0031167	rRNA methylation	33	9	2.53	0.00065	3.18709	0.272727		56	GO:0006826	iron ion transport	60	11	4.06	0.00208	2.68194	0.183333
55	GO:0070887	cellular response to chemical stimulus	1781	175	136.78	0.00071	3.14874	0.0982594		55	GO:0006749	glutathione metabolic process	60	11	4.06	0.00208	2.68194	0.183333
56	GO:0042759	long-chain fatty acid biosynthetic proce...	34	9	2.61	0.00082	3.08619	0.264706		54	GO:2000377	regulation of reactive oxygen species me...	60	11	4.06	0.00208	2.68194	0.183333
58	GO:0080186	developmental vegetative growth	16	6	1.23	0.00083	3.08092	0.375		58	GO:0005992	trehalose biosynthetic process	21	6	1.42	0.00213	2.67162	0.285714
57	GO:0051131	chaperone-mediated protein complex assem...	11	5	0.84	0.00083	3.08092	0.454545		57	GO:0034219	carbohydrate transmembrane transport	69	12	4.67	0.00213	2.67162	0.173913
59	GO:0016554	cytidine to uridine editing	22	7	1.69	0.00095	3.02228	0.318182		59	GO:0071555	cell wall organization	536	58	36.28	0.00215	2.66756	0.108209
60	GO:0009416	response to light stimulus	779	84	59.83	0.00098	3.00877	0.107831		60	GO:0006633	fatty acid biosynthetic process	179	23	12.12	0.0023	2.63827	0.128492
64	GO:0006690	icosanoid metabolic process	7	4	0.54	0.001	3	0.571429		61	GO:0006782	protoporphyrinogen IX biosynthetic proce...	15	5	1.02	0.00239	2.6216	0.333333
63	GO:0010106	cellular response to iron ion starvation	7	4	0.54	0.001	3	0.571429		62	GO:0052542	defense response by callose deposition	29	7	1.96	0.00267	2.57349	0.241379
62	GO:0019264	glycine biosynthetic process from serine	7	4	0.54	0.001	3	0.571429		64	GO:1902356	oxaloacetate(2-) transmembrane transport	5	3	0.34	0.00279	2.5544	0.6
61	GO:0051607	defense response to virus	64	13	4.92	0.001	3	0.203125		63	GO:0045730	respiratory burst	5	3	0.34	0.00279	2.5544	0.6
65	GO:0046686	response to cadmium ion	72	14	5.53	0.00102	2.9914	0.194444		65	GO:0009627	systemic acquired resistance	90	14	6.09	0.00282	2.54975	0.155556
66	GO:0019748	secondary metabolic process	379	73	29.11	0.00107	2.97062	0.192612		66	GO:1901615	organic hydroxy compound metabolic proce...	392	45	26.53	0.00308	2.51145	0.114796
67	GO:1901607	alpha-amino acid biosynthetic process	193	44	14.82	0.00125	2.90309	0.227979		67	GO:0042343	indole glucosinolate metabolic process	20	9	1.35	0.00312	2.50585	0.45
69	GO:0000727	double-strand break repair via break-ind...	12	5	0.92	0.00133	2.87615	0.416667		68	GO:0070413	trehalose metabolism in response to stre...	10	4	0.68	0.00315	2.50169	0.4
68	GO:0006268	DNA unwinding involved in DNA replicatio...	12	5	0.92	0.00133	2.87615	0.416667		69	GO:0098754	detoxification	289	42	19.56	0.00323	2.4908	0.145329
71	GO:1901617	organic hydroxy compound biosynthetic pr...	237	36	18.2	0.00155	2.80967	0.151899		70	GO:0031347	regulation of defense response	284	41	19.22	0.00324	2.48945	0.144366
70	GO:0034219	carbohydrate transmembrane transport	69	15	5.3	0.00155	2.80967	0.217391		71	GO:0015979	photosynthesis	282	35	19.09	0.00339	2.4698	0.124113
72	GO:0032259	methylation	448	68	34.41	0.00159	2.7986	0.151786		73	GO:0009863	salicylic acid mediated signaling pathwa...	73	12	4.94	0.00346	2.46092	0.164384
74	GO:0006390	mitochondrial transcription	4	3	0.31	0.0017	2.76955	0.75		72	GO:0042542	response to hydrogen peroxide	73	12	4.94	0.00346	2.46092	0.164384
73	GO:0048833	specification of floral organ number	4	3	0.31	0.0017	2.76955	0.75		74	GO:0006887	exocytosis	65	11	4.4	0.00399	2.39903	0.169231
76	GO:0006565	L-serine catabolic process	8	4	0.61	0.00189	2.72354	0.5		75	GO:0009738	abscisic acid-activated signaling pathwa...	288	32	19.49	0.00402	2.39577	0.111111
75	GO:0070814	hydrogen sulfide biosynthetic process	8	4	0.61	0.00189	2.72354	0.5		76	GO:0042128	nitrate assimilation	39	8	2.64	0.00403	2.39469	0.205128
77	GO:0031118	rRNA pseudouridine synthesis	13	5	1	0.00203	2.6925	0.384615		77	GO:1902600	proton transmembrane transport	145	19	9.81	0.00426	2.37059	0.131034
78	GO:0080027	response to herbivore	25	7	1.92	0.00218	2.66154	0.28		78	GO:0000302	response to reactive oxygen species	161	29	10.9	0.00431	2.36552	0.180124
79	GO:0009409	response to cold	409	48	31.41	0.00221	2.65561	0.117359		79	GO:0014070	response to organic cyclic compound	348	52	23.55	0.00441	2.35556	0.149425
80	GO:0010286	heat acclimation	63	12	4.84	0.00274	2.56225	0.190476		88	GO:0006824	cobalt ion transport	2	2	0.14	0.00458	2.33913	1
82	GO:0046112	nucleobase biosynthetic process	26	7	2	0.00279	2.5544	0.269231		87	GO:0015675	nickel cation transport	2	2	0.14	0.00458	2.33913	1
81	GO:0051555	flavonol biosynthetic process	26	7	2	0.00279	2.5544	0.269231		86	GO:1900409	positive regulation of cellular response...	2	2	0.14	0.00458	2.33913	1
83	GO:0072330	monocarboxylic acid biosynthetic process	264	39	20.27	0.0029	2.5376	0.147727		85	GO:0072489	methylammonium transmembrane transport	2	2	0.14	0.00458	2.33913	1
84	GO:1990641	response to iron ion starvation	14	5	1.08	0.00295	2.53018	0.357143		84	GO:1905622	negative regulation of leaf development	2	2	0.14	0.00458	2.33913	1
85	GO:0042255	ribosome assembly	72	13	5.53	0.00305	2.5157	0.180556		83	GO:0043610	regulation of carbohydrate utilization	2	2	0.14	0.00458	2.33913	1
86	GO:0006572	tyrosine catabolic process	9	4	0.69	0.00319	2.49621	0.444444		82	GO:1903648	positive regulation of chlorophyll catab...	2	2	0.14	0.00458	2.33913	1
87	GO:0016036	cellular response to phosphate starvatio...	81	14	6.22	0.00327	2.48545	0.17284		81	GO:0010151	chloroplast elongation	2	2	0.14	0.00458	2.33913	1
88	GO:0046942	carboxylic acid transport	156	24	11.98	0.00343	2.46471	0.153846		80	GO:0010421	hydrogen peroxide-mediated programmed ce...	2	2	0.14	0.00458	2.33913	1
89	GO:0042908	xenobiotic transport	73	13	5.61	0.00346	2.46092	0.178082		90	GO:0071219	cellular response to molecule of bacteri...	11	4	0.74	0.00469	2.32883	0.363636
90	GO:0030488	tRNA methylation	34	8	2.61	0.00355	2.44977	0.235294		89	GO:0071423	malate transmembrane transport	11	4	0.74	0.00469	2.32883	0.363636
91	GO:0055085	transmembrane transport	1371	152	105.29	0.00377	2.42366	0.110868		91	GO:0009606	tropism	126	17	8.53	0.00493	2.30715	0.134921
92	GO:0006270	DNA replication initiation	27	9	2.07	0.00401	2.39686	0.333333		92	GO:0015995	chlorophyll biosynthetic process	64	13	4.33	0.00511	2.29158	0.203125
98	GO:0051091	positive regulation of DNA-binding trans...	5	3	0.38	0.00402	2.39577	0.6		93	GO:0098542	defense response to other organism	1203	144	81.43	0.00523	2.2815	0.119701
97	GO:0009200	deoxyribonucleoside triphosphate metabol...	5	3	0.38	0.00402	2.39577	0.6		99	GO:0006809	nitric oxide biosynthetic process	6	3	0.41	0.0053	2.27572	0.5
96	GO:0046386	deoxyribose phosphate catabolic process	5	3	0.38	0.00402	2.39577	0.6		98	GO:0009805	coumarin biosynthetic process	6	3	0.41	0.0053	2.27572	0.5
95	GO:0051410	detoxification of nitrogen compound	5	3	0.38	0.00402	2.39577	0.6		97	GO:1902326	positive regulation of chlorophyll biosy...	6	3	0.41	0.0053	2.27572	0.5
94	GO:0006269	DNA replication, synthesis of RNA primer	5	3	0.38	0.00402	2.39577	0.6		96	GO:0007043	cell-cell junction assembly	6	3	0.41	0.0053	2.27572	0.5
93	GO:0006177	GMP biosynthetic process	5	3	0.38	0.00402	2.39577	0.6		95	GO:0071731	response to nitric oxide	6	3	0.41	0.0053	2.27572	0.5
100	GO:0031540	regulation of anthocyanin biosynthetic p...	15	5	1.15	0.00415	2.38195	0.333333		94	GO:1901962	S-adenosyl-L-methionine transmembrane tr...	6	3	0.41	0.0053	2.27572	0.5
99	GO:0048438	floral whorl development	195	26	14.98	0.00415	2.38195	0.133333		100	GO:0048584	positive regulation of response to stimu...	276	36	18.68	0.00549	2.26043	0.130435

## Sheet: Supplementary table 9
Enriched GO terms in the up and downregulated differentially expressed genes in LPi+Phi treatment relative to LPi.
Enriched GO Terms in upregulated DEGs of LPi+Phi vs LPi										Enriched GO Terms in downregulated DEGs of LPi+Phi vs LPi
	GO.ID	Term	Annotated	Significant	Expected	elimFisher	-logpval'	% of Sig. genes			GO.ID	Term	Annotated	Significant	Expected	elimFisher	-logpval'	% of Sig. genes
1	GO:0009658	chloroplast organization	204	137	34.42	< 1e-30	22.6198	0.671569		1	GO:0071555	cell wall organization	536	237	99.38	5.7e-26	25.2441	0.442164
2	GO:0015979	photosynthesis	282	180	47.58	2.4e-21	20.6198	0.638298		2	GO:0009414	response to water deprivation	424	148	78.61	1.9e-14	13.7212	0.349057
3	GO:0010027	thylakoid membrane organization	52	39	8.77	3.9e-20	19.4089	0.75		3	GO:0009834	plant-type secondary cell wall biogenesi...	77	47	14.28	7e-13	12.1549	0.61039
4	GO:0009451	RNA modification	399	175	67.32	1.2e-16	15.9208	0.438596		4	GO:0042546	cell wall biogenesis	235	127	43.57	2.7e-12	11.5686	0.540426
5	GO:1901259	chloroplast rRNA processing	23	22	3.88	1.8e-16	15.7447	0.956522		5	GO:0098869	cellular oxidant detoxification	165	69	30.59	3.3e-12	11.4815	0.418182
6	GO:0015995	chlorophyll biosynthetic process	64	45	10.8	1.7e-15	14.7696	0.703125		6	GO:0006486	protein glycosylation	162	68	30.04	1.1e-10	9.95861	0.419753
7	GO:0019253	reductive pentose-phosphate cycle	21	19	3.54	3e-13	12.5229	0.904762		7	GO:0016036	cellular response to phosphate starvatio...	81	40	15.02	3e-10	9.52288	0.493827
8	GO:0032544	plastid translation	21	18	3.54	9.4e-12	11.0269	0.857143		8	GO:0071456	cellular response to hypoxia	240	84	44.5	9.5e-10	9.02228	0.35
9	GO:0045037	protein import into chloroplast stroma	29	21	4.89	6e-11	10.2218	0.724138		9	GO:0045492	xylan biosynthetic process	37	29	6.86	2e-09	8.69897	0.783784
10	GO:0010207	photosystem II assembly	27	20	4.56	8.8e-11	10.0555	0.740741		10	GO:0006888	endoplasmic reticulum to Golgi vesicle-m...	99	44	18.35	2.7e-09	8.56864	0.444444
11	GO:0006397	mRNA processing	560	160	94.48	3.5e-10	9.45593	0.285714		11	GO:0048767	root hair elongation	70	37	12.98	5.8e-09	8.23657	0.528571
12	GO:0009773	photosynthetic electron transport in pho...	16	14	2.7	1.3e-09	8.88606	0.875		12	GO:0042744	hydrogen peroxide catabolic process	101	44	18.73	5.9e-09	8.22915	0.435644
13	GO:0006364	rRNA processing	285	128	48.08	2.8e-09	8.55284	0.449123		13	GO:0006468	protein phosphorylation	1151	289	213.4	8.7e-09	8.06048	0.251086
14	GO:0042742	defense response to bacterium	375	108	63.27	4.9e-09	8.3098	0.288		14	GO:0009651	response to salt stress	463	133	85.84	4.7e-08	7.3279	0.287257
16	GO:0110102	ribulose bisphosphate carboxylase comple...	10	10	1.69	1.9e-08	7.72125	1		16	GO:0005975	carbohydrate metabolic process	1123	406	208.21	7.6e-08	7.11919	0.361532
15	GO:0010239	chloroplast mRNA processing	10	10	1.69	1.9e-08	7.72125	1		15	GO:0006833	water transport	38	22	7.05	7.6e-08	7.11919	0.578947
17	GO:0048564	photosystem I assembly	18	14	3.04	2.3e-08	7.63827	0.777778		17	GO:0046274	lignin catabolic process	18	14	3.34	8e-08	7.09691	0.777778
19	GO:0006782	protoporphyrinogen IX biosynthetic proce...	15	12	2.53	1.4e-07	6.85387	0.8		18	GO:0006979	response to oxidative stress	456	130	84.54	1.1e-07	6.95861	0.285088
18	GO:0031425	chloroplast RNA processing	25	22	4.22	1.4e-07	6.85387	0.88		19	GO:0009737	response to abscisic acid	603	182	111.8	1.2e-07	6.92082	0.301824
21	GO:0010206	photosystem II repair	13	11	2.19	1.7e-07	6.76955	0.846154		20	GO:0006099	tricarboxylic acid cycle	60	29	11.12	1.5e-07	6.82391	0.483333
20	GO:0042793	plastid transcription	16	14	2.7	1.7e-07	6.76955	0.875		21	GO:0045489	pectin biosynthetic process	57	33	10.57	2.7e-07	6.56864	0.578947
22	GO:0009767	photosynthetic electron transport chain	54	41	9.11	1.9e-07	6.72125	0.759259		22	GO:0009664	plant-type cell wall organization	157	76	29.11	2.8e-07	6.55284	0.484076
23	GO:0009853	photorespiration	57	26	9.62	4e-07	6.39794	0.45614		23	GO:0006032	chitin catabolic process	24	16	4.45	3e-07	6.52288	0.666667
24	GO:0000373	Group II intron splicing	29	17	4.89	4.6e-07	6.33724	0.586207		24	GO:0009611	response to wounding	245	78	45.42	3.6e-07	6.4437	0.318367
25	GO:0009627	systemic acquired resistance	90	35	15.18	5.3e-07	6.27572	0.388889		25	GO:0006096	glycolytic process	72	32	13.35	3.9e-07	6.40894	0.444444
26	GO:0006353	DNA-templated transcription termination	51	24	8.6	5.4e-07	6.26761	0.470588		26	GO:0009699	phenylpropanoid biosynthetic process	123	67	22.8	4.2e-07	6.37675	0.544715
27	GO:0009772	photosynthetic electron transport in pho....	8	8	1.35	6.5e-07	6.18709	1		27	GO:0010417	glucuronoxylan biosynthetic process	11	10	2.04	4.4e-07	6.35655	0.909091
28	GO:0030388	fructose 1,6-bisphosphate metabolic proc...	12	10	2.02	8.8e-07	6.05552	0.833333		28	GO:0019761	glucosinolate biosynthetic process	50	25	9.27	4.7e-07	6.3279	0.5
29	GO:0010196	nonphotochemical quenching	15	11	2.53	2.2e-06	5.65758	0.733333		29	GO:0030244	cellulose biosynthetic process	65	32	12.05	7.7e-07	6.11351	0.492308
31	GO:0032543	mitochondrial translation	32	19	5.4	2.9e-06	5.5376	0.59375		30	GO:0016126	sterol biosynthetic process	43	22	7.97	1.4e-06	5.85387	0.511628
30	GO:0006418	tRNA aminoacylation for protein translat...	58	27	9.79	2.9e-06	5.5376	0.465517		31	GO:0010345	suberin biosynthetic process	21	14	3.89	1.7e-06	5.76955	0.666667
32	GO:0017004	cytochrome complex assembly	41	24	6.92	5.1e-06	5.29243	0.585366		32	GO:0006817	phosphate ion transport	40	23	7.42	2.1e-06	5.67778	0.575
33	GO:0010020	chloroplast fission	24	14	4.05	5.3e-06	5.27572	0.583333		33	GO:0010411	xyloglucan metabolic process	60	34	11.12	2.2e-06	5.65758	0.566667
34	GO:0009409	response to cold	409	104	69	6.4e-06	5.19382	0.254279		34	GO:0009969	xyloglucan biosynthetic process	19	13	3.52	2.6e-06	5.58503	0.684211
35	GO:0010109	regulation of photosynthesis	49	26	8.27	1.6e-05	4.79588	0.530612		35	GO:0008643	carbohydrate transport	147	50	27.25	5.6e-06	5.25181	0.340136
36	GO:0006094	gluconeogenesis	26	14	4.39	1.9e-05	4.72125	0.538462		36	GO:0009226	nucleotide-sugar biosynthetic process	41	27	7.6	6.3e-06	5.20066	0.658537
37	GO:0018026	peptidyl-lysine monomethylation	10	8	1.69	2.1e-05	4.67778	0.8		37	GO:0009809	lignin biosynthetic process	51	26	9.46	6.6e-06	5.18046	0.509804
39	GO:0090391	granum assembly	6	6	1.01	2.3e-05	4.63827	1		38	GO:0051555	flavonol biosynthetic process	26	15	4.82	9.9e-06	5.00436	0.576923
38	GO:1902326	positive regulation of chlorophyll biosy...	6	6	1.01	2.3e-05	4.63827	1		39	GO:0006121	mitochondrial electron transport, succin...	9	8	1.67	1e-05	5	0.888889
41	GO:0010190	cytochrome b6f complex assembly	8	7	1.35	2.6e-05	4.58503	0.875		40	GO:0009826	unidimensional cell growth	306	107	56.73	2.1e-05	4.67778	0.349673
40	GO:0010304	PSII associated light-harvesting complex...	8	7	1.35	2.6e-05	4.58503	0.875		41	GO:0052325	cell wall pectin biosynthetic process	14	10	2.6	2.3e-05	4.63827	0.714286
42	GO:0045454	cell redox homeostasis	40	18	6.75	3e-05	4.52288	0.45		42	GO:0042761	very long-chain fatty acid biosynthetic ...	22	13	4.08	2.8e-05	4.55284	0.590909
44	GO:0015986	proton motive force-driven ATP synthesis	37	17	6.24	3.6e-05	4.4437	0.459459		43	GO:0009749	response to glucose	68	27	12.61	3.8e-05	4.42022	0.397059
43	GO:0000302	response to reactive oxygen species	161	51	27.16	3.6e-05	4.4437	0.31677		45	GO:0007043	cell-cell junction assembly	6	6	1.11	4e-05	4.39794	1
45	GO:0016117	carotenoid biosynthetic process	34	19	5.74	6e-05	4.22185	0.558824		44	GO:0033320	UDP-D-xylose biosynthetic process	6	6	1.11	4e-05	4.39794	1
46	GO:0031167	rRNA methylation	33	17	5.57	6.6e-05	4.18046	0.515152		46	GO:0006334	nucleosome assembly	35	17	6.49	5.2e-05	4.284	0.485714
47	GO:0009751	response to salicylic acid	190	59	32.06	8.1e-05	4.09151	0.310526		47	GO:0080147	root hair cell development	99	52	18.35	5.3e-05	4.27572	0.525253
49	GO:0000967	rRNA 5'-end processing	9	7	1.52	0.0001	4	0.777778		48	GO:0003333	amino acid transmembrane transport	73	28	13.53	5.7e-05	4.24413	0.383562
48	GO:0043489	RNA stabilization	9	7	1.52	0.0001	4	0.777778		50	GO:0043622	cortical microtubule organization	46	20	8.53	8.4e-05	4.07572	0.434783
50	GO:0009642	response to light intensity	152	56	25.64	0.00011	3.95861	0.368421		49	GO:0009407	toxin catabolic process	46	20	8.53	8.4e-05	4.07572	0.434783
51	GO:0015994	chlorophyll metabolic process	90	59	15.18	0.00013	3.88606	0.655556		52	GO:0016998	cell wall macromolecule catabolic proces...	33	16	6.12	8.8e-05	4.05552	0.484848
52	GO:0009793	embryo development ending in seed dorman...	414	99	69.85	0.00014	3.85387	0.23913		51	GO:0042545	cell wall modification	145	52	26.88	8.8e-05	4.05552	0.358621
53	GO:0019684	photosynthesis, light reaction	149	98	25.14	0.00016	3.79588	0.657718		53	GO:0045337	farnesyl diphosphate biosynthetic proces...	13	9	2.41	8.9e-05	4.05061	0.692308
55	GO:0010189	vitamin E biosynthetic process	12	8	2.02	0.00017	3.76955	0.666667		56	GO:0007030	Golgi organization	43	19	7.97	9.7e-05	4.01323	0.44186
54	GO:0006400	tRNA modification	93	38	15.69	0.00017	3.76955	0.408602		55	GO:0009833	plant-type primary cell wall biogenesis	27	14	5.01	9.7e-05	4.01323	0.518519
57	GO:0045036	protein targeting to chloroplast	50	34	8.44	0.00021	3.67778	0.68		54	GO:0015918	sterol transport	27	14	5.01	9.7e-05	4.01323	0.518519
56	GO:0046940	nucleoside monophosphate phosphorylation	15	9	2.53	0.00021	3.67778	0.6		57	GO:0009789	positive regulation of abscisic acid-act...	50	21	9.27	0.0001	4	0.42
58	GO:0009643	photosynthetic acclimation	10	7	1.69	0.00029	3.5376	0.7		58	GO:0009744	response to sucrose	79	29	14.65	0.00011	3.95861	0.367089
59	GO:0071482	cellular response to light stimulus	133	48	22.44	0.00031	3.50864	0.360902		59	GO:0033384	geranyl diphosphate biosynthetic process	11	8	2.04	0.00013	3.88606	0.727273
61	GO:0000103	sulfate assimilation	22	11	3.71	0.00035	3.45593	0.5		60	GO:0006004	fucose metabolic process	44	19	8.16	0.00014	3.85387	0.431818
60	GO:0016554	cytidine to uridine editing	22	11	3.71	0.00035	3.45593	0.5		63	GO:0055062	phosphate ion homeostasis	19	11	3.52	0.00015	3.82391	0.578947
63	GO:0006526	arginine biosynthetic process	13	8	2.19	0.00037	3.4318	0.615385		62	GO:0010466	negative regulation of peptidase activit...	31	15	5.75	0.00015	3.82391	0.483871
62	GO:0051085	chaperone cofactor-dependent protein ref...	47	18	7.93	0.00037	3.4318	0.382979		61	GO:0051592	response to calcium ion	31	15	5.75	0.00015	3.82391	0.483871
65	GO:0016556	mRNA modification	48	24	8.1	0.00039	3.40894	0.5		65	GO:1902600	proton transmembrane transport	145	45	26.88	0.00019	3.72125	0.310345
64	GO:0000460	maturation of 5.8S rRNA	36	15	6.07	0.00039	3.40894	0.416667		64	GO:1905582	response to mannose	9	7	1.67	0.00019	3.72125	0.777778
66	GO:0007623	circadian rhythm	144	45	24.29	0.00041	3.38722	0.3125		66	GO:0006890	retrograde vesicle-mediated transport, G...	35	16	6.49	0.00021	3.67778	0.457143
69	GO:0009904	chloroplast accumulation movement	8	6	1.35	0.00047	3.3279	0.75		67	GO:0006900	vesicle budding from membrane	56	22	10.38	0.00023	3.63827	0.392857
68	GO:0010019	chloroplast-nucleus signaling pathway	8	6	1.35	0.00047	3.3279	0.75		69	GO:0045490	pectin catabolic process	98	33	18.17	0.00025	3.60206	0.336735
67	GO:0010258	NADH dehydrogenase complex (plastoquinon...	8	6	1.35	0.00047	3.3279	0.75		68	GO:0098661	inorganic anion transmembrane transport	88	36	16.32	0.00025	3.60206	0.409091
71	GO:0034599	cellular response to oxidative stress	80	29	13.5	0.00049	3.3098	0.3625		71	GO:0006749	glutathione metabolic process	60	23	11.12	0.00026	3.58503	0.383333
70	GO:0072348	sulfur compound transport	33	14	5.57	0.00049	3.3098	0.424242		70	GO:1905177	tracheary element differentiation	17	10	3.15	0.00026	3.58503	0.588235
72	GO:0046686	response to cadmium ion	72	24	12.15	0.0005	3.30103	0.333333		72	GO:0034976	response to endoplasmic reticulum stress	108	40	20.02	0.00027	3.56864	0.37037
73	GO:0042026	protein refolding	37	15	6.24	0.00056	3.25181	0.405405		73	GO:0006970	response to osmotic stress	554	165	102.71	0.00029	3.5376	0.297834
74	GO:0016116	carotenoid metabolic process	43	27	7.25	0.00069	3.16115	0.627907		74	GO:0016125	sterol metabolic process	79	38	14.65	0.0003	3.52288	0.481013
78	GO:0016120	carotene biosynthetic process	6	5	1.01	0.0007	3.1549	0.833333		75	GO:0006887	exocytosis	65	24	12.05	0.00037	3.4318	0.369231
77	GO:0008615	pyridoxine biosynthetic process	6	5	1.01	0.0007	3.1549	0.833333		77	GO:0048765	root hair cell differentiation	125	67	23.18	0.0004	3.39794	0.536
76	GO:0042823	pyridoxal phosphate biosynthetic process	9	8	1.52	0.0007	3.1549	0.888889		76	GO:2000652	regulation of secondary cell wall biogen...	33	17	6.12	0.0004	3.39794	0.515152
75	GO:0030488	tRNA methylation	34	14	5.74	0.0007	3.1549	0.411765		78	GO:0046513	ceramide biosynthetic process	15	9	2.78	0.00043	3.36653	0.6
79	GO:0042254	ribosome biogenesis	404	167	68.16	0.00079	3.10237	0.413366		79	GO:0006071	glycerol metabolic process	27	13	5.01	0.00044	3.35655	0.481481
80	GO:0009902	chloroplast relocation	16	12	2.7	0.0008	3.09691	0.75		80	GO:0052546	cell wall pectin metabolic process	32	20	5.93	0.00047	3.3279	0.625
84	GO:0006390	mitochondrial transcription	4	4	0.67	0.00081	3.09151	1		81	GO:0019375	galactolipid biosynthetic process	10	7	1.85	0.00053	3.27572	0.7
83	GO:0045038	protein import into chloroplast thylakoi...	4	4	0.67	0.00081	3.09151	1		82	GO:0015031	protein transport	818	193	151.66	0.00055	3.25964	0.235941
82	GO:1900871	chloroplast mRNA modification	4	4	0.67	0.00081	3.09151	1		83	GO:0007018	microtubule-based movement	63	23	11.68	0.00059	3.22915	0.365079
81	GO:0016560	protein import into peroxisome matrix, d...	4	4	0.67	0.00081	3.09151	1		84	GO:0006629	lipid metabolic process	1184	347	219.52	0.00068	3.16749	0.293074
85	GO:0006979	response to oxidative stress	456	124	76.93	0.0009	3.04576	0.27193		85	GO:0035435	phosphate ion transmembrane transport	28	13	5.19	0.00069	3.16115	0.464286
86	GO:0031349	positive regulation of defense response	111	36	18.73	0.00109	2.96257	0.324324		86	GO:0000226	microtubule cytoskeleton organization	187	62	34.67	0.00074	3.13077	0.331551
88	GO:0016123	xanthophyll biosynthetic process	9	6	1.52	0.00121	2.91721	0.666667		87	GO:0009860	pollen tube growth	158	46	29.29	0.00079	3.10237	0.291139
87	GO:0042372	phylloquinone biosynthetic process	9	6	1.52	0.00121	2.91721	0.666667		88	GO:1990937	xylan acetylation	8	6	1.48	0.0008	3.09691	0.75
89	GO:0061077	chaperone-mediated protein folding	62	26	10.46	0.00134	2.8729	0.419355		89	GO:0010089	xylem development	46	18	8.53	0.00088	3.05552	0.391304
90	GO:0010380	regulation of chlorophyll biosynthetic p...	21	14	3.54	0.00135	2.86967	0.666667		90	GO:0010192	mucilage biosynthetic process	32	14	5.93	0.0009	3.04576	0.4375
92	GO:1902182	shoot apical meristem development	15	8	2.53	0.00136	2.86646	0.533333		91	GO:0048278	vesicle docking	39	16	7.23	0.00092	3.03621	0.410256
91	GO:0019344	cysteine biosynthetic process	25	11	4.22	0.00136	2.86646	0.44		92	GO:0010311	lateral root formation	54	20	10.01	0.00106	2.97469	0.37037
93	GO:1900865	chloroplast RNA modification	16	11	2.7	0.00138	2.86012	0.6875		93	GO:0009827	plant-type cell wall modification	36	15	6.67	0.0011	2.95861	0.416667
94	GO:0009626	plant-type hypersensitive response	90	27	15.18	0.00144	2.84164	0.3		96	GO:0015689	molybdate ion transport	6	5	1.11	0.00111	2.95468	0.833333
95	GO:0080156	mitochondrial mRNA modification	29	12	4.89	0.00159	2.7986	0.413793		95	GO:0009805	coumarin biosynthetic process	6	5	1.11	0.00111	2.95468	0.833333
96	GO:0009416	response to light stimulus	779	217	131.43	0.00168	2.77469	0.278562		94	GO:0080170	hydrogen peroxide transmembrane transpor...	6	5	1.11	0.00111	2.95468	0.833333
98	GO:0045727	positive regulation of translation	19	9	3.21	0.00199	2.70115	0.473684		97	GO:0006006	glucose metabolic process	58	21	10.75	0.00113	2.94692	0.362069
97	GO:0006801	superoxide metabolic process	19	9	3.21	0.00199	2.70115	0.473684		98	GO:0019432	triglyceride biosynthetic process	26	12	4.82	0.00117	2.93181	0.461538
100	GO:0048497	maintenance of floral organ identity	7	5	1.18	0.00212	2.67366	0.714286		100	GO:0051511	negative regulation of unidimensional ce...	4	4	0.74	0.00118	2.92812	1
99	GO:0010236	plastoquinone biosynthetic process	7	5	1.18	0.00212	2.67366	0.714286		99	GO:0010253	UDP-rhamnose biosynthetic process	4	4	0.74	0.00118	2.92812	1

## Sheet: Supplementary table 10
Genes with increased expression in HPi+Phi relative to HPi.
ID	Related to:
AT1G12110	NPK transport
AT5G45380	NPK transport
AT1G08090	NPK transport
AT1G13900	NPK transport
AT2G38940	NPK transport
AT5G17630	NPK transport
AT2G38060	NPK transport
AT5G14040	NPK transport
AT5G33320	NPK transport
AT5G09650	NPK transport
AT4G00370	NPK transport
AT3G53620	NPK transport
AT5G37500	NPK transport
AT3G53720	NPK transport
AT4G22200	NPK transport
AT5G27150	NPK transport
AT1G77990	Micro nutrient transport
AT3G15990	Micro nutrient transport
AT1G78000	Micro nutrient transport
AT4G08620	Micro nutrient transport
AT3G12520	Micro nutrient transport
AT3G49580	Micro nutrient transport
AT1G36370	Micro nutrient transport
AT4G35640	Micro nutrient transport
AT5G13550	Micro nutrient transport
AT5G04590	Micro nutrient transport
AT1G22150	Micro nutrient transport
AT3G22890	Micro nutrient transport
AT5G24800	Micro nutrient transport
AT2G30160	Micro nutrient transport
AT4G16370	Micro nutrient transport
AT1G76800	Micro nutrient transport
AT1G10970	Micro nutrient transport
AT1G47400	Micro nutrient transport
AT1G47395	Micro nutrient transport
AT1G07030	Micro nutrient transport
AT3G12750	Micro nutrient transport
AT1G56430	Micro nutrient transport
AT1G64980	Micro nutrient transport
AT4G10380	Micro nutrient transport
AT1G80760	Micro nutrient transport
AT4G18910	Micro nutrient transport
AT3G05920	Micro nutrient transport
AT1G71050	Micro nutrient transport
AT5G17450	Micro nutrient transport
AT5G24580	Micro nutrient transport
AT1G08430	Exudates
AT1G18420	Exudates
AT1G25480	Exudates
AT1G51340	Exudates
AT2G41700	Exudates
AT3G21250	Exudates
AT3G56200	Exudates
AT4G12030	Exudates

[truncated: 7 more sheets: Supplementary table 11, Supplementary table 12, Supplementary table 13, Supplementary  table 14, Supplementary Table 15, Supplementary Table 16, Supplementary Table 17]
